# Supplementary material for: Pan-cancer analysis identifies LPCATs family as a prognostic biomarker and validation of LPCAT4/WNT/β-catenin/c-JUN/ACSL3 in hepatocellular carcinoma
Source: publisher site journal article supplement (doi:10.18632/aging.204723), 2023-05-23
Supplement: Supplementary file [file aging-v15i11-204723-supplementary-material-SD1.pdf]

## SUPPLEMENTARY FIGURE

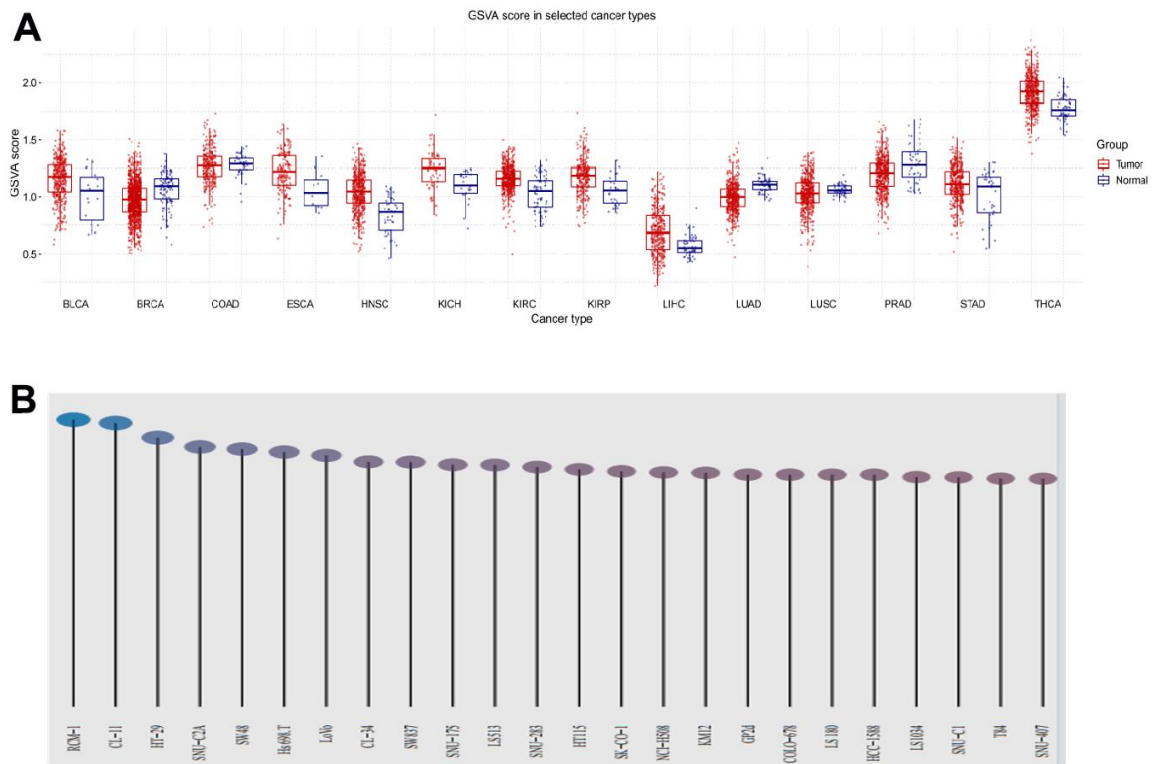

**Supplementary Figure 1.** (A) The LPCATs score in tumors and normal tissues was demonstrated. (B) LPCAT4 expression level in LIHC cell lines was demonstrated.
