# Supplementary material for: Pan-cancer analysis identifies LPCATs family as a prognostic biomarker and validation of LPCAT4/WNT/β-catenin/c-JUN/ACSL3 in hepatocellular carcinoma
Source: Aging (Albany NY). 2023 May 23;15(11):4699–713. doi: 10.18632/aging.204723 (PMC10292872; doi:10.18632/aging.204723)
Supplement: Supplementary Table 1 [file aging-15-204723-s002.xlsx]

## Sheet: SheetName
Supplementary Table 1. The uniCox analysis was used to evaluate association among OS, PFS, DSS, DFI and LPCATs score.
cancertype	sur_type	hr_categorical	coxp_categorical	logrankp	higher_risk_of_death	coxp_continus	hr_continus
ACC	OS	0.610981	0.203863	0.198243	Lower GSVA	0.0831455	0.264418
ACC	PFS	0.625191	0.129503	0.126902	Lower GSVA	0.141785	0.409708
ACC	DSS	0.528402	0.122367	0.11533	Lower GSVA	0.0639607	0.230017
ACC	DFI	0.19745	0.0380889	0.0210144	Lower GSVA	0.0768048	0.107048
BLCA	OS	1.04937	0.748585	0.748999	Higher GSVA	0.943231	1.03057
BLCA	PFS	1.08293	0.548607	0.547706	Higher GSVA	0.86565	1.06678
BLCA	DSS	1.0333	0.857435	0.857586	Higher GSVA	0.515239	0.723902
BLCA	DFI	1.30262	0.466394	0.46514	Higher GSVA	0.951204	1.06143
BRCA	OS	1.22921	0.20543	0.204892	Higher GSVA	0.477141	1.40738
BRCA	PFS	1.11918	0.420219	0.420528	Higher GSVA	0.963176	1.0194
BRCA	DSS	1.01296	0.952757	0.952612	Higher GSVA	0.617187	1.38483
BRCA	DFI	0.973125	0.900802	0.900799	Lower GSVA	0.694059	1.29518
CESC	OS	1.6837	0.0297723	0.0278539	Higher GSVA	0.0094377	5.09349
CESC	PFS	1.85991	0.00491611	0.00424495	Higher GSVA	0.0156185	3.86642
CESC	DSS	1.71782	0.0514606	0.0485787	Higher GSVA	0.0559397	3.89748
CESC	DFI	1.74458	0.162273	0.156927	Higher GSVA	0.954674	1.05784
CHOL	OS	0.592469	0.290946	0.285625	Lower GSVA	0.652496	0.589012
CHOL	PFS	0.569586	0.190939	0.185299	Lower GSVA	0.477864	0.497091
CHOL	DSS	0.566429	0.284029	0.277802	Lower GSVA	0.74758	0.667205
CHOL	DFI	1.0483	0.941929	0.941924	Higher GSVA	0.348879	4.17269
COAD	OS	1.13952	0.588244	0.58798	Higher GSVA	0.399929	0.532839
COAD	PFS	1.07882	0.695052	0.696864	Higher GSVA	0.886957	0.917934
COAD	DSS	0.930545	0.829397	0.829361	Lower GSVA	0.151177	0.181983
COAD	DFI	0.401398	0.0946972	0.0843218	Lower GSVA	0.0591036	0.0776294
DLBC	OS	1.05195	0.943154	0.943149	Higher GSVA	0.76072	1.60925
DLBC	PFS	1.49798	0.448422	0.445516	Higher GSVA	0.334146	3.11407
DLBC	DSS	1.18759	0.86363	0.863465	Higher GSVA	0.817064	0.583212
DLBC	DFI	1.74232	0.682026	0.680266	Higher GSVA	0.392231	70.8772
ESCA	OS	0.543582	0.00999837	0.0089392	Lower GSVA	0.412985	0.577759
ESCA	PFS	0.730117	0.0952707	0.0942553	Lower GSVA	0.511669	0.697105
ESCA	DSS	0.449458	0.00632338	0.00508443	Lower GSVA	0.16769	0.320847
ESCA	DFI	0.583915	0.202752	0.197469	Lower GSVA	0.157824	0.213805
GBM	OS	1.13015	0.485938	0.477725	Higher GSVA	0.268414	1.63671
GBM	PFS	1.32903	0.0882069	0.0870763	Higher GSVA	0.0580012	2.29587
GBM	DSS	1.11896	0.547402	0.537846	Higher GSVA	0.400561	1.4857
HNSC	OS	1.4061	0.0125027	0.0120877	Higher GSVA	0.00275172	3.64478
HNSC	PFS	1.39825	0.00634356	0.00611098	Higher GSVA	0.00246298	3.19919
HNSC	DSS	1.5511	0.0137673	0.0130276	Higher GSVA	0.0023162	5.21225
HNSC	DFI	1.39902	0.377501	0.375346	Higher GSVA	0.0588131	9.83914
KICH	OS	0.736146	0.648083	0.646803	Lower GSVA	0.791666	0.57651
KICH	PFS	0.451191	0.193854	0.182282	Lower GSVA	0.483731	0.289706
KICH	DSS	0.673788	0.605288	0.602946	Lower GSVA	0.390402	0.134575
KICH	DFI	3.21579e-10	0.999296	0.0249866	Lower GSVA	0.0496759	8.54179e-06
KIRC	OS	1.6147	0.00213222	0.00193276	Higher GSVA	0.000597578	11.617
KIRC	PFS	1.79199	2.4635e-05	1.8791e-05	Higher GSVA	1.4956e-05	15.0659
KIRC	DSS	1.66947	0.00956441	0.00880079	Higher GSVA	0.00119426	18.6925
KIRC	DFI	1.34422	0.568555	0.567165	Higher GSVA	0.296692	13.7938
KIRP	OS	0.99784	0.994288	0.994288	Lower GSVA	0.389765	2.34729
KIRP	PFS	0.824503	0.412658	0.412156	Lower GSVA	0.395572	0.496094
KIRP	DSS	1.05164	0.894069	0.894058	Higher GSVA	0.271504	3.63502
KIRP	DFI	0.60696	0.188611	0.184495	Lower GSVA	0.216423	0.196678
LAML	OS	1.32199	0.154492	0.153134	Higher GSVA	0.351972	1.71981
LGG	OS	1.95472	0.000153718	0.000107982	Higher GSVA	0.000894765	8.34255
LGG	PFS	1.43259	0.00878128	0.00826226	Higher GSVA	0.000839124	6.92682
LGG	DSS	1.86068	0.000771183	0.000596126	Higher GSVA	0.00314996	7.25887
LGG	DFI	0.791821	0.573593	0.584957	Lower GSVA	0.0984676	0.0646207
LIHC	OS	2.16323	2.0693e-05	1.3016e-05	Higher GSVA	8.06242e-08	11.6154
LIHC	PFS	1.49454	0.00262718	0.00244474	Higher GSVA	0.000872065	3.13566
LIHC	DSS	2.10843	0.00113075	0.000867756	Higher GSVA	5.83689e-06	14.4195
LIHC	DFI	1.32806	0.0872149	0.0856792	Higher GSVA	0.0333047	2.59955
LUAD	OS	1.00947	0.949389	0.949189	Higher GSVA	0.149566	0.423368
LUAD	PFS	0.960962	0.748054	0.748923	Lower GSVA	0.0891184	0.425777
LUAD	DSS	1.08801	0.657411	0.657281	Higher GSVA	0.606151	0.673285
LUAD	DFI	1.05403	0.803387	0.803588	Higher GSVA	0.842923	0.83857
LUSC	OS	0.920889	0.550751	0.550566	Lower GSVA	0.848113	0.913787
LUSC	PFS	0.960893	0.752249	0.751988	Lower GSVA	0.879151	0.936074
LUSC	DSS	0.683254	0.0850796	0.0832519	Lower GSVA	0.330589	0.500622
LUSC	DFI	0.686986	0.150105	0.147472	Lower GSVA	0.339568	0.419285
MESO	OS	0.962142	0.87099	0.869737	Lower GSVA	0.95277	1.04892
MESO	PFS	0.877335	0.581119	0.579045	Lower GSVA	0.427172	0.523757
MESO	DSS	1.10648	0.745075	0.746946	Higher GSVA	0.622528	1.59996
MESO	DFI	0.707107	0.674327	0.672879	Lower GSVA	0.937834	0.775759
OV	OS	1.15977	0.316197	0.314282	Higher GSVA	0.527279	1.29284
OV	PFS	1.09438	0.488766	0.488461	Higher GSVA	0.892132	0.952998
OV	DSS	1.1135	0.503976	0.501752	Higher GSVA	0.820295	1.10581
OV	DFI	1.10653	0.609158	0.609571	Higher GSVA	0.87075	1.10332
PAAD	OS	1.41548	0.0994691	0.0980338	Higher GSVA	0.00407055	5.1224
PAAD	PFS	1.54763	0.0174937	0.0168506	Higher GSVA	4.9546e-05	7.47327
PAAD	DSS	1.24883	0.345381	0.344858	Higher GSVA	0.0228831	4.24879
PAAD	DFI	1.87082	0.137457	0.131209	Higher GSVA	0.00127937	66.4374
PCPG	OS	0.569288	0.44149	0.435734	Lower GSVA	0.159942	0.0502666
PCPG	PFS	0.602044	0.228915	0.22408	Lower GSVA	0.0178407	0.055366
PCPG	DSS	0.471654	0.386931	0.375805	Lower GSVA	0.328264	0.0876265
PCPG	DFI	0.331916	0.339756	0.315569	Lower GSVA	0.0665775	0.00211622
PRAD	OS	2.27449	0.233902	0.22093	Higher GSVA	0.527661	4.0791
PRAD	PFS	0.878732	0.522782	0.522469	Lower GSVA	0.625133	0.713596
PRAD	DSS	3.54682	0.257963	0.227151	Higher GSVA	0.176032	89.1717
PRAD	DFI	0.677273	0.284757	0.28168	Lower GSVA	0.10955	0.130398
READ	OS	1.7546	0.24002	0.233197	Higher GSVA	0.619821	1.7902
READ	PFS	1.35899	0.412813	0.410198	Higher GSVA	0.736722	1.37404
READ	DSS	2.14706	0.410667	0.400378	Higher GSVA	0.846433	0.63051
READ	DFI	0.786588	0.832211	0.831838	Lower GSVA	0.761094	0.482494
SARC	OS	0.760913	0.176341	0.175698	Lower GSVA	0.437202	0.633032
SARC	PFS	0.805095	0.176017	0.175255	Lower GSVA	0.469793	0.711154
SARC	DSS	0.788675	0.284361	0.284392	Lower GSVA	0.718797	0.794386
SARC	DFI	0.684119	0.124661	0.122202	Lower GSVA	0.358488	0.530132
SKCM	OS	0.792528	0.0851359	0.0844502	Lower GSVA	0.028773	0.383146
SKCM	PFS	0.896431	0.326099	0.326329	Lower GSVA	0.0633752	0.504299
SKCM	DSS	0.76384	0.0660707	0.0652387	Lower GSVA	0.0149526	0.314239
STAD	OS	0.728044	0.0471404	0.0461838	Lower GSVA	0.517964	0.728846
STAD	PFS	0.788566	0.0975678	0.0966679	Lower GSVA	0.785307	0.884929
STAD	DSS	0.641689	0.0329543	0.0314595	Lower GSVA	0.897335	0.922165
STAD	DFI	0.800932	0.46228	0.460857	Lower GSVA	0.4123	2.16625
TGCT	OS	3.06201	0.332481	0.307496	Higher GSVA	0.417138	16.3661
TGCT	PFS	0.900827	0.739622	0.741443	Lower GSVA	0.145144	0.261308
TGCT	DSS	2.09052	0.547111	0.538007	Higher GSVA	0.556865	9.07586
TGCT	DFI	0.889183	0.743406	0.74525	Lower GSVA	0.356356	0.382593
THCA	OS	0.828129	0.70868	0.708272	Lower GSVA	0.78837	0.632315
THCA	PFS	1.54995	0.0873052	0.0848179	Higher GSVA	0.762534	1.292
THCA	DSS	0.774021	0.737624	0.736937	Lower GSVA	0.446118	0.150692
THCA	DFI	2.3837	0.0333846	0.0281573	Higher GSVA	0.605915	1.94912
THYM	OS	1.10137	0.885663	0.885619	Higher GSVA	0.948533	1.13599
THYM	PFS	1.01186	0.977085	0.977085	Higher GSVA	0.584249	1.91176
THYM	DSS	0.878601	0.89722	0.89715	Lower GSVA	0.325932	0.0455902
UCEC	OS	0.619353	0.187633	0.183539	Lower GSVA	0.0877961	0.196314
UCEC	PFS	0.68645	0.193403	0.190712	Lower GSVA	0.126302	0.315725
UCEC	DSS	0.476001	0.102081	0.0944852	Lower GSVA	0.0518479	0.115647
UCEC	DFI	0.562606	0.265633	0.259097	Lower GSVA	0.294921	0.253464
UCS	OS	1.6233	0.162256	0.159177	Higher GSVA	0.130793	3.41577
UCS	PFS	1.29932	0.411589	0.410191	Higher GSVA	0.149269	2.93189
UCS	DSS	1.61206	0.192808	0.189677	Higher GSVA	0.198241	2.91878
UCS	DFI	1.59455	0.473958	0.470163	Higher GSVA	0.210368	5.88374
UVM	OS	2.23474	0.066616	0.0604952	Higher GSVA	0.0207845	14.2887
UVM	PFS	1.53325	0.247373	0.244108	Higher GSVA	0.399314	2.08526
UVM	DSS	2.1591	0.092167	0.0850928	Higher GSVA	0.0333872	12.2024
