# Supplementary material for: Pan-cancer analysis identifies LPCATs family as a prognostic biomarker and validation of LPCAT4/WNT/β-catenin/c-JUN/ACSL3 in hepatocellular carcinoma
Source: Aging (Albany NY). 2023 May 23;15(11):4699–713. doi: 10.18632/aging.204723 (PMC10292872; doi:10.18632/aging.204723)
Supplement: Supplementary Table 2 [file aging-15-204723-s003.xlsx]

## Sheet: Sheet 1
Supplementary Table 2. GO enrichment analysis of DEGs.
ONTOLOGY	ID	Description	GeneRatio	BgRatio	pvalue	p.adjust	qvalue	geneID	Count	zscore
BP	GO:0030198	extracellular matrix organization	117/2423	368/18670	2.17714e-21	1.28886e-17	9.45106e-18	KLK4/KLK2/COL7A1/ECM2/CHADL/TNR/CTRB1/PLG/TTR/KLKB1/ITGAD/CSGALNACT1/KLK7/COL8A1/ADAMTS3/SMOC2/COL14A1/DCN/ICAM5/COL12A1/ADAM8/GREM1/LAMB1/TNFRSF11B/ICAM3/COL11A2/ITGA4/IBSP/MMP23B/ABI3BP/ITGB2/TGFB1/MMP3/FSCN1/COL24A1/MMP11/FOXC2/EGFL6/PTX3/COL6A2/IL6/ITGAM/FBLN2/ADAMTS2/AEBP1/CARMIL2/MMP28/COL28A1/PHLDB1/MMP8/MFAP4/EMILIN1/SERPINB5/MFAP5/CTSK/FBLN1/ANTXR1/PDGFRA/QSOX1/ADAMTS20/HAPLN1/COL6A3/ACA…	117	8.96765
BP	GO:0043062	extracellular structure organization	126/2423	422/18670	2.52575e-20	7.47623e-17	5.48222e-17	KLK4/KLK2/COL7A1/APOC4/APOC3/APOA5/ECM2/CHADL/TNR/LPA/APOC1/CTRB1/PLG/TTR/KLKB1/LCAT/ITGAD/CSGALNACT1/KLK7/COL8A1/ADAMTS3/SMOC2/COL14A1/DCN/ICAM5/COL12A1/ADAM8/GREM1/LAMB1/TNFRSF11B/ICAM3/COL11A2/ITGA4/IBSP/MMP23B/ABI3BP/ITGB2/TGFB1/MMP3/FSCN1/COL24A1/MMP11/FOXC2/EGFL6/PTX3/COL6A2/IL6/ITGAM/FBLN2/ADAMTS2/AEBP1/CARMIL2/MMP28/COL28A1/PHLDB1/MMP8/MFAP4/EMILIN1/SERPINB5/MFAP5/CTSK/FBLN1/ANTXR1/PDGFRA…	126	8.37419
BP	GO:0048705	skeletal system morphogenesis	78/2423	239/18670	2.14774e-15	4.2382e-12	3.10781e-12	TBX4/COL7A1/MTHFD1/PAPPA2/POR/CSGALNACT1/COL14A1/FGR/COL12A1/NKX3-2/TGFB3/GREM1/MGP/TBX1/GSC/HOXA2/HOXB3/VWA2/HOXB7/TGFB1/RUNX2/FOXC2/HOXB6/COL6A2/SFRP1/HOXA1/GLI3/DLX5/HOXA11/HOXB8/ROR2/TIFAB/TWIST1/CHST11/HHIP/PDGFRA/HOXC4/COL6A3/FMN1/ACAN/CYP26B1/MMP14/SFRP4/DSCAML1/MDFI/WNT10B/TFAP2A/PRRX1/FGFR1/HOXC11/HAS2/MMP2/COL1A1/RIPPLY2/FGF4/MMP16/SFRP2/TMEM119/NOG/RFLNA/SOX11/MSX2/CER1/FBN2/SHOX2/EYA1…	78	7.69948
BP	GO:0051963	regulation of synapse assembly	46/2423	106/18670	9.30774e-15	1.37755e-11	1.01013e-11	CUX2/ASIC2/AMIGO2/LRTM2/SLIT1/EPHA7/NLGN3/SLITRK2/CLSTN2/BDNF/NTRK3/SEMA4D/OXTR/GRIN1/SEMA4A/SNCA/LRRN3/SLITRK5/SLITRK6/THBS2/NTNG2/ADGRB1/GPC4/LRFN4/DKK1/SLITRK4/FZD1/SRPX2/SYNDIG1/VSTM5/MUSK/ADGRB2/ADGRB3/FLRT2/GAP43/CBLN2/TPBG/GRID2/NTRK2/NRXN1/LINGO2/LRRN1/SLITRK1/EPHB3/NLGN1/EFNA5	46	6.48745
BP	GO:0072503	cellular divalent inorganic cation homeostasis	126/2423	493/18670	1.78051e-14	2.10812e-11	1.54585e-11	MT1B/DRD1/ESR1/MT1X/ADCY8/IL13/P2RX2/DRD5/MT1M/SAA1/MT2A/MT1G/MT3/ADRA1A/MT1E/MT1H/HTR2B/SLC30A2/ACKR2/P2RX3/RGN/GNA15/CCR6/JPH1/S100A9/CXCR6/JPH3/CCL28/GPR20/CCL11/TRPM2/FASLG/C1QTNF1/LCK/CAV3/RASA3/P2RX1/PIK3CG/HAP1/GRM5/CXCR3/STC2/CORO1A/PTGFR/ATP2A3/KCTD17/GPR18/TGFB1/PRKCB/CCL19/CACNA2D1/AVPR1B/CCR4/GRM1/IL2/CACNB3/FAM155A/P2RX5/XCR1/CXCL9/ADCY5/TRPC3/CCR5/ANK2/FPR1/KEL/FPR2/ADORA1/CD24/PTPR…	126	7.48331
BP	GO:0051965	positive regulation of synapse assembly	35/2423	68/18670	2.54555e-14	2.51161e-11	1.84173e-11	CUX2/ASIC2/AMIGO2/LRTM2/NLGN3/SLITRK2/CLSTN2/BDNF/NTRK3/SEMA4D/OXTR/SEMA4A/LRRN3/SLITRK5/SLITRK6/THBS2/ADGRB1/SLITRK4/SRPX2/SYNDIG1/VSTM5/ADGRB2/ADGRB3/FLRT2/CBLN2/TPBG/GRID2/NTRK2/NRXN1/LINGO2/LRRN1/SLITRK1/EPHB3/NLGN1/EFNA5	35	5.57802
BP	GO:0030098	lymphocyte differentiation	97/2423	353/18670	1.89706e-13	1.3982e-10	1.02528e-10	LEPR/RAG1/RIPK3/CCR6/LGALS9/ITM2A/SLAMF6/CD86/ZAP70/VAV1/NFAM1/NCKAP1L/ADAM8/LCK/IL12RB1/SPI1/IL12A/CD2/SASH3/GATA3/DOCK10/CLEC4E/ITGA4/LY9/ITK/TNFSF9/SPN/PIK3CD/IKZF3/CD3E/GPR18/TGFB1/IKZF1/CCL19/HLA-DOA/IL2/RUNX2/MYB/DOCK2/THEMIS/TESPA1/TNFRSF18/IL10/GPR183/FCRL3/IL6/RHOH/JAK3/CR1/RASGRP1/SFRP1/PTPRC/PTGER4/PGLYRP3/IL18/CTLA4/IL7R/IFNG/CCR7/SLAMF8/GLI3/CD8A/SYK/LILRB4/IL12B/BCL11B/SEMA4A/CD3G/P…	97	9.44272
BP	GO:0055074	calcium ion homeostasis	119/2423	471/18670	2.28373e-13	1.3982e-10	1.02528e-10	DRD1/ESR1/ADCY8/IL13/P2RX2/DRD5/SAA1/ADRA1A/HTR2B/ACKR2/P2RX3/RGN/GNA15/CCR6/JPH1/CXCR6/JPH3/CCL28/GPR20/CCL11/TRPM2/FASLG/C1QTNF1/LCK/CAV3/RASA3/P2RX1/PIK3CG/HAP1/GRM5/CXCR3/STC2/CORO1A/PTGFR/ATP2A3/KCTD17/GPR18/TGFB1/PRKCB/CCL19/CACNA2D1/AVPR1B/CCR4/GRM1/IL2/CACNB3/FAM155A/P2RX5/XCR1/CXCL9/ADCY5/TRPC3/CCR5/ANK2/FPR1/TMTC2/KEL/FPR2/ADORA1/CD24/PTPRC/PTGER4/PROK2/P2RY6/ATP6V1B1/CCR7/S100A14/OXTR/…	119	8.70864
BP	GO:0048562	embryonic organ morphogenesis	84/2423	288/18670	2.35177e-13	1.3982e-10	1.02528e-10	TBX3/CLRN1/MTHFD1/PTK7/HNF1B/PDZD7/NKX3-2/TGFB3/TEAD2/TBX1/GSC/HOXA2/CRB2/GATA3/HOXB3/HOXB7/TBX20/RUNX2/FOXC2/HOXB6/VAX2/EFEMP1/HOXA1/ATP6V1B1/SLC44A4/GLI3/DLX5/HOXA11/HOXB8/ROR2/TIFAB/TWIST1/CHST11/DLX6/PDGFRA/POU3F4/HOXC4/SLITRK6/FOXL2/GLI1/FGF10/ABR/USH1G/ATOH1/MMP14/CHRNA9/DSCAML1/MDFI/WNT1/TFAP2A/PRRX1/FGFR1/HOXC11/FOXF2/CTHRC1/MMP16/GLI2/NOG/FZD2/FOLR1/SOX11/FBN2/SHOX2/HAND2/MFAP2/EYA1/WNT9…	84	8.5105
BP	GO:0051047	positive regulation of secretion	111/2423	428/18670	2.36183e-13	1.3982e-10	1.02528e-10	C1QTNF3/CACNA1I/GCK/ADCY8/GLUL/IL13/EXPH5/RASL10B/SYT9/SAA1/GPLD1/KCNB1/HTR2B/ANG/IGF1/CYP4A11/GDNF/TREM2/LGALS9/PANX3/PDX1/FGR/PYDC1/ADAM8/TGFB3/C1QTNF1/FFAR2/CD2/GATA3/TRIM6/CLEC4E/ITGB2/AQP1/TGFB1/CCL19/IL2/MYB/CHIA/IL10/IL6/ITGAM/RASGRP1/ADORA1/ILDR1/MMP8/PTGER4/CRTAM/HAVCR2/IFNG/PTAFR/KCNN4/OXTR/ANKRD1/ADORA2B/SYK/IL1A/OSM/CD38/TWIST1/RETN/SNCA/PTPN22/TNFRSF11A/NLRP7/NPPB/FOXL2/NKX6-1/SPP1/A…	111	7.30852
BP	GO:0007204	positive regulation of cytosolic calcium ion concentration	90/2423	319/18670	2.74744e-13	1.47862e-10	1.08425e-10	DRD1/ESR1/ADCY8/IL13/P2RX2/SAA1/ADRA1A/HTR2B/ACKR2/P2RX3/GNA15/CCR6/JPH1/CXCR6/JPH3/CCL28/GPR20/TRPM2/FASLG/C1QTNF1/LCK/CAV3/RASA3/PIK3CG/HAP1/CXCR3/CORO1A/PTGFR/GPR18/TGFB1/CCL19/CACNA2D1/AVPR1B/CCR4/GRM1/IL2/CACNB3/FAM155A/P2RX5/XCR1/CXCL9/ADCY5/TRPC3/CCR5/ANK2/FPR1/FPR2/CD24/PTPRC/PTGER4/PROK2/P2RY6/CCR7/OXTR/GRIN1/GPR55/GPR174/CD38/SNCA/PDGFRA/P2RY4/RYR1/CEMIP/FAM155B/GRIN2A/CXCR5/JSRP1/CHRNA…	90	7.37865
BP	GO:0045785	positive regulation of cell adhesion	106/2423	403/18670	3.13414e-13	1.54617e-10	1.13379e-10	SAA1/ECM2/IGF1/RAG1/MIP/LGALS9/STX3/CD86/COL8A1/CARMIL1/ZAP70/VAV1/SMOC2/CCL28/NCKAP1L/CLECL1/ADAM8/LILRB1/LCK/PRKCQ/IL12RB1/IL12A/SASH3/SOX2/CD70/GATA3/ITGA4/IBSP/CORO1A/TNFSF9/SIRPB1/ABI3BP/IQGAP1/NCK2/ADGRG1/CD3E/ITGB2/TNFSF13B/TGFB1/CCL19/CD5/IL2/MYB/FOXC2/EGFL6/TESPA1/TNFRSF18/IL10/EDIL3/BTLA/IL6/FBLN2/EMILIN2/JAK3/RASGRP1/SFRP1/CD24/SIRPG/PTPRC/EMILIN1/IL18/CTLA4/IL7R/HAVCR2/IFNG/CCR7/DUSP2…	106	9.32434
BP	GO:0051480	regulation of cytosolic calcium ion concentration	97/2423	357/18670	3.97933e-13	1.81212e-10	1.32881e-10	DRD1/ESR1/ADCY8/IL13/P2RX2/SAA1/ADRA1A/HTR2B/ACKR2/P2RX3/GNA15/CCR6/JPH1/CXCR6/JPH3/CCL28/GPR20/TRPM2/FASLG/C1QTNF1/LCK/CAV3/RASA3/P2RX1/PIK3CG/HAP1/GRM5/CXCR3/CORO1A/PTGFR/GPR18/TGFB1/CCL19/CACNA2D1/AVPR1B/CCR4/GRM1/IL2/CACNB3/FAM155A/P2RX5/XCR1/CXCL9/ADCY5/TRPC3/CCR5/ANK2/FPR1/FPR2/ADORA1/CD24/PTPRC/PTGER4/PROK2/P2RY6/CCR7/OXTR/CALB1/GRIN1/GPR55/GPR174/CD38/SNCA/PDGFRA/P2RY4/RYR1/CEMIP/FAM155B/…	97	7.81817
BP	GO:0006874	cellular calcium ion homeostasis	115/2423	458/18670	9.06411e-13	3.58631e-10	2.62979e-10	DRD1/ESR1/ADCY8/IL13/P2RX2/DRD5/SAA1/ADRA1A/HTR2B/ACKR2/P2RX3/RGN/GNA15/CCR6/JPH1/CXCR6/JPH3/CCL28/GPR20/CCL11/TRPM2/FASLG/C1QTNF1/LCK/CAV3/RASA3/P2RX1/PIK3CG/HAP1/GRM5/CXCR3/STC2/CORO1A/PTGFR/ATP2A3/KCTD17/GPR18/TGFB1/PRKCB/CCL19/CACNA2D1/AVPR1B/CCR4/GRM1/IL2/CACNB3/FAM155A/P2RX5/XCR1/CXCL9/ADCY5/TRPC3/CCR5/ANK2/FPR1/KEL/FPR2/ADORA1/CD24/PTPRC/PTGER4/PROK2/P2RY6/CCR7/OXTR/CALB1/GRIN1/GPR55/GPR17…	115	8.48579
BP	GO:0030217	T cell differentiation	73/2423	240/18670	9.08694e-13	3.58631e-10	2.62979e-10	LEPR/RAG1/RIPK3/CCR6/LGALS9/SLAMF6/CD86/ZAP70/VAV1/NCKAP1L/ADAM8/LCK/IL12RB1/IL12A/CD2/SASH3/GATA3/CLEC4E/LY9/ITK/TNFSF9/SPN/PIK3CD/CD3E/GPR18/TGFB1/CCL19/HLA-DOA/IL2/RUNX2/MYB/DOCK2/THEMIS/TESPA1/TNFRSF18/GPR183/IL6/RHOH/JAK3/CR1/RASGRP1/PTPRC/PTGER4/IL18/CTLA4/IL7R/IFNG/CCR7/GLI3/CD8A/SYK/LILRB4/IL12B/BCL11B/SEMA4A/CD3G/PTPN22/CD27/IL2RA/CD80/CARD11/FUT7/CYP26B1/WNT1/SOX4/AIRE/FZD7/LEP/GLI2/FOX…	73	8.07584
BP	GO:0007409	axonogenesis	115/2423	468/18670	4.13763e-12	1.53092e-09	1.1226e-09	CTNNA2/LHX3/UST/MT3/GFRA1/TNR/GDNF/CNTN4/NIBAN2/FOXB1/SLIT3/TBR1/PLXNA3/PRKCQ/EGR2/LRTM2/KIF5C/HOXA2/SLIT1/EPHA7/GATA3/LIMK1/ISLR2/ITGA4/SEMA6D/NLGN3/PTPRO/POU3F2/SPTB/PIK3CD/SLITRK2/CRMP1/ARTN/SEMA3D/BDNF/TRIM46/CHODL/RAC2/EMB/UNC5C/KEL/LRRC4C/VAX2/NTRK3/SEMA4D/PTPRZ1/GLI3/DLX5/GRIN1/ARX/BCL11B/EPHB6/SEMA4A/SLITRK5/SLITRK6/EPHA10/NTNG2/ADGRB1/NKX6-1/SPP1/S100B/ANOS1/S100A6/EPHA3/SLIT2/DBN1/ATOH1…	115	9.4183
BP	GO:1903532	positive regulation of secretion by cell	102/2423	399/18670	5.68515e-12	1.97977e-09	1.45174e-09	C1QTNF3/CACNA1I/GCK/ADCY8/GLUL/IL13/EXPH5/RASL10B/SYT9/SAA1/GPLD1/KCNB1/HTR2B/ANG/IGF1/GDNF/TREM2/LGALS9/PANX3/PDX1/FGR/PYDC1/ADAM8/TGFB3/C1QTNF1/FFAR2/CD2/GATA3/TRIM6/CLEC4E/ITGB2/TGFB1/CCL19/IL2/MYB/CHIA/IL10/IL6/ITGAM/RASGRP1/ILDR1/MMP8/PTGER4/CRTAM/HAVCR2/IFNG/PTAFR/KCNN4/OXTR/ANKRD1/ADORA2B/SYK/IL1A/OSM/CD38/TWIST1/RETN/SNCA/PTPN22/NLRP7/FOXL2/NKX6-1/SPP1/UCN3/TNF/TGFB2/RAB27B/CYP19A1/TLR8/I…	102	6.93103
BP	GO:0034765	regulation of ion transmembrane transport	117/2423	483/18670	7.30677e-12	2.40311e-09	1.76217e-09	ACTN2/LRRC52/CACNA1I/DRD1/KCNU1/RASGRF1/IL13/KCNJ8/CACNG1/STRIT1/KCNB1/FXYD1/CLCN1/KCNE2/RGN/PPARGC1A/TREM2/ASIC2/JPH1/JPH3/LRRC26/CAV3/CBARP/PIK3CG/HAP1/GRM5/CORO1A/GRIA4/NLGN3/KCNS2/TGFB1/CACNA2D1/CACNB3/KCNQ2/CXCL9/KCNA3/ANK2/KCNH7/KEL/SCN2B/P2RY6/KCNK10/IFNG/KCNQ3/PTAFR/GEM/CYBB/HPCA/FLNA/GRIN1/KCNE4/TWIST1/SNCA/TESC/KCNIP1/CACNB1/RRAD/FXYD2/CALHM1/CEMIP/G6PD/CLCNKB/HCN1/CACNA1B/KCNK15/SCN7A/…	117	7.85825
BP	GO:0042110	T cell activation	113/2423	464/18670	1.17098e-11	3.64854e-09	2.67542e-09	LEPR/IGF1/RAG1/CDH26/RIPK3/CCR6/LGALS9/SLAMF6/CD86/ZAP70/VAV1/NCKAP1L/PDE5A/CLECL1/ADAM8/LILRB1/LCK/PRKCQ/IL12RB1/IL12A/CD1C/CD2/SASH3/PIK3CG/LMO1/CD70/GATA3/CLEC4E/LY9/ITK/CORO1A/TNFSF9/SPN/SIRPB1/TNFRSF21/PIK3CD/NCK2/CD3E/GPR18/TNFSF13B/TGFB1/CLEC7A/SIT1/CCL19/HLA-DOA/CD5/IL2/RUNX2/MYB/DOCK2/THEMIS/TESPA1/TNFRSF18/IL10/RAC2/BTLA/GPR183/CD8B/IL6/RHOH/JAK3/CR1/RASGRP1/CD24/SIRPG/PTPRC/CD7/PTGER4/…	113	10.0657
BP	GO:0006813	potassium ion transport	70/2423	240/18670	2.31358e-11	6.61686e-09	4.85205e-09	SLC12A1/ACTN2/LRRC52/DRD1/KCNU1/GCK/SLC9C2/KCNJ8/KCNB1/FXYD1/KCNE2/ABCC9/TREM2/KCNMB4/LRRC26/CAV3/SLC9A5/KCNS2/AQP1/KCNQ2/KCNA3/SLC9A3/ANK2/KCNH7/KEL/ADORA1/KCNK10/KCNQ3/KCNN4/KCNK9/FLNA/KCNE4/P2RY12/KCNIP1/FXYD2/HCN1/KCNK15/KCNQ5/SLC24A2/KCNS1/KCNJ10/KCNH2/KCNG3/SLC9A4/LRRC38/ANK3/GAL/ATP1A4/RGS4/MTNR1B/KCNJ13/SNAP25/NALCN/KCNF1/DRD2/KCNH3/KCNK12/ATP1A3/DPP10/ADRA2A/SLC24A3/WNK2/SLC9C1/KCNV1/KCN…	70	5.49805
BP	GO:0050808	synapse organization	102/2423	408/18670	2.3472e-11	6.61686e-09	4.85205e-09	DRD1/CTNNA2/P2RX2/CUX2/SPARCL1/TNR/ELFN1/GDNF/TREM2/SNCG/ASIC2/ARHGAP22/PCDHB10/AMIGO2/LRTM2/SLIT1/EPHA7/GRM5/DOCK10/NLGN3/ADD2/PTPRO/SLITRK2/CLSTN2/RAB39B/CACNB3/BDNF/IL10/ITGAM/PFN2/LRRC4C/NTRK3/SEMA4D/OXTR/GRIN1/SEMA4A/IGSF9B/SNCA/LRRN3/PCDHB6/IGF1R/SLITRK5/ZNF804A/SLITRK6/THBS2/NTNG2/ADGRB1/GPC4/CACNB1/LRFN4/UNC13C/CTBP2/DKK1/KIRREL3/TNF/DBN1/PDZRN3/SNCB/DLG3/SLITRK4/FZD1/CHRNA1/TNC/SRPX2/SYN…	102	8.51527
BP	GO:0090596	sensory organ morphogenesis	73/2423	256/18670	2.81075e-11	7.56346e-09	5.54618e-09	NKD1/CLRN1/PTK7/COL8A1/JAG1/FASLG/PDZD7/CABP4/NKX3-2/TBX1/GSC/HOXA2/GATA3/FSCN2/TENM3/VAX2/EFEMP1/HOXA1/PITX3/ATP6V1B1/SLC44A4/GLI3/DLX5/CALB1/ROR2/TIFAB/TWIST1/DLX6/POU3F4/SLITRK6/FOXL2/HCN1/FGF10/ABR/COL5A1/USH1G/CYP26B1/ATOH1/CHRNA9/PTF1A/WNT1/TFAP2A/PRRX1/FGFR1/TFAP2B/HOXC13/FOXF2/RORB/COL8A2/WNT2/CTHRC1/GLI2/NOG/FZD2/SOX11/FBN2/MFAP2/EYA1/WNT9A/NTRK2/LHX1/ATP8A2/VANGL2/SIX2/HMX3/HMX2/STRA6/B…	73	8.07584
BP	GO:0003002	regionalization	91/2423	351/18670	3.51612e-11	9.05019e-09	6.63638e-09	ASCL1/LHX3/TBX3/NKD1/RIPPLY1/GREM2/AR/GDNF/HES4/FOXB1/TBR1/HNF1B/NBL1/EGR2/GREM1/TBX1/GSC/HOXA2/CRB2/HOXB3/HOXB7/ADGRG1/SMARCD3/TBX20/FOXC2/HOXB6/HOXC6/ITGAM/SFRP1/VAX2/MEOX1/FGF1/GPR161/IRX2/GLI3/HOXA11/HOXB8/ROR2/TIFAB/HHIP/HOXC4/NKX6-1/MLLT3/DKK1/GLI1/FGF10/HES7/BASP1/CYP26B1/EN1/NTF4/DSCAML1/MDFI/WNT1/RFX4/FGFR1/HOXC11/HOXC13/RIPPLY2/WNT2/LMX1B/BHLHE41/FOXD1/SP8/GLI2/DMRT2/SFRP2/NOG/MSX2/CER1…	91	7.86214
BP	GO:0001655	urogenital system development	87/2423	330/18670	3.69851e-11	9.12298e-09	6.68976e-09	ESR1/REN/MME/AR/LGR5/ADIPOQ/RGN/GDNF/CRIP1/FOXB1/AKR1B1/JAG1/DCN/HNF1B/EPHA7/GATA3/ADAMTS16/PTPRO/PRKX/HOXB7/IQGAP1/TGFB1/GLIS2/FOXC2/SFRP1/CD24/ID4/SERPINB5/FGF1/IRX2/GLI3/CALB1/HOXA11/PDGFRA/NPHS2/FMN1/PKHD1/KIRREL3/TGFB2/GLI1/CEP55/FGF10/CYP19A1/KIF26B/SLIT2/BASP1/CYP26B1/TNC/WNT1/TFAP2A/SOX4/FGFR1/HOXC11/GCNT1/HAS2/TFAP2B/FOXD1/PYGO1/FRAS1/GLI2/ALOX15B/NOG/TACSTD2/SULF1/SOX11/ITGB4/MMP9/CER1/…	87	7.612
BP	GO:0050670	regulation of lymphocyte proliferation	63/2423	208/18670	3.98317e-11	9.43215e-09	6.91646e-09	IL13/IGF1/RIPK3/LGALS9/CD86/ZAP70/NCKAP1L/PDE5A/CLECL1/LILRB1/PRKCQ/IL12RB1/IL12A/SASH3/LMO1/CD70/CORO1A/TNFSF9/SPN/TNFRSF21/IKZF3/NCK2/CD3E/TNFSF13B/TGFB1/CCL19/IL2/IL10/RAC2/GPR183/FCRL3/IL6/JAK3/CD24/PTPRC/IL18/CTLA4/HAVCR2/GPNMB/SYK/IL12B/CD38/PTPN22/MNDA/IL2RA/TNFRSF13C/CD22/FGF10/TNFRSF13B/IL1B/CD80/CARD11/SPTA1/GAL/LEP/SCGB1A1/SOX11/MZB1/PLA2G2D/HHLA2/TAC1/FOXJ1/VTCN1	63	7.4333
BP	GO:0032944	regulation of mononuclear cell proliferation	63/2423	209/18670	4.98983e-11	1.13615e-08	8.3312e-09	IL13/IGF1/RIPK3/LGALS9/CD86/ZAP70/NCKAP1L/PDE5A/CLECL1/LILRB1/PRKCQ/IL12RB1/IL12A/SASH3/LMO1/CD70/CORO1A/TNFSF9/SPN/TNFRSF21/IKZF3/NCK2/CD3E/TNFSF13B/TGFB1/CCL19/IL2/IL10/RAC2/GPR183/FCRL3/IL6/JAK3/CD24/PTPRC/IL18/CTLA4/HAVCR2/GPNMB/SYK/IL12B/CD38/PTPN22/MNDA/IL2RA/TNFRSF13C/CD22/FGF10/TNFRSF13B/IL1B/CD80/CARD11/SPTA1/GAL/LEP/SCGB1A1/SOX11/MZB1/PLA2G2D/HHLA2/TAC1/FOXJ1/VTCN1	63	7.4333
BP	GO:0045165	cell fate commitment	75/2423	270/18670	5.94136e-11	1.28946e-08	9.4554e-09	TBX4/ASCL1/LHX3/TBX3/AR/SLAMF6/JAG1/TBR1/HNF1B/IL12RB1/TBX5/MYL2/TBX1/GSC/HOXA2/SOX2/GATA3/LY9/SPN/POU3F2/TBX20/RUNX2/FOXC2/GAS1/FEV/IL6/SFRP1/NTRK3/OLIG2/SLAMF8/GLI3/HOXA11/ROR2/ARX/IL12B/BCL11B/MITF/CHD5/PITX1/NKX6-1/DKK1/FGF10/CYP26B1/ATOH1/WNT10A/PTF1A/NTF4/ISL2/DSCAML1/WNT1/WNT10B/PRRX1/FGFR1/FZD7/ERBB4/WNT2/PDPN/GLI2/SFRP2/TENM4/MNX1/GLIS1/ISL1/GAP43/HOXC10/FOXN1/EYA1/WNT9A/MYOD1/IRF4/SIX2/…	75	7.50555
BP	GO:0048706	embryonic skeletal system development	45/2423	126/18670	6.09878e-11	1.28946e-08	9.4554e-09	MTHFD1/NKX3-2/TGFB3/TBX1/GSC/HOXA2/HOXB3/HOXB7/RUNX2/FOXC2/HOXB6/HOXC6/XYLT1/HOXA1/GLI3/HOXA11/HOXB8/TWIST1/CHST11/PDGFRA/HOXC4/MMP14/DSCAML1/MDFI/TFAP2A/PRRX1/HOXC11/COL1A1/MMP16/DMRT2/NOG/SULF1/SOX11/HOXC5/SHOX2/EYA1/WNT9A/LHX1/HOXD1/SIX2/ALX1/BMP7/COL11A1/HOXB9/GRHL2	45	6.41006
BP	GO:0022409	positive regulation of cell-cell adhesion	72/2423	255/18670	6.32675e-11	1.29153e-08	9.4706e-09	IGF1/RAG1/LGALS9/CD86/ZAP70/VAV1/NCKAP1L/CLECL1/ADAM8/LILRB1/LCK/PRKCQ/IL12RB1/IL12A/SASH3/SOX2/CD70/GATA3/ITGA4/CORO1A/TNFSF9/SIRPB1/NCK2/CD3E/ITGB2/TNFSF13B/TGFB1/CCL19/CD5/IL2/MYB/TESPA1/IL10/BTLA/IL6/JAK3/RASGRP1/CD24/SIRPG/PTPRC/IL18/CTLA4/IL7R/HAVCR2/IFNG/CCR7/PTAFR/GLI3/SYK/LILRB4/IL12B/MYO10/ICOS/CD27/IL2RA/TNFRSF13C/TNF/KIF26B/IL1B/CD80/CARD11/SPTA1/ANK3/HAS2/LEP/PDCD1/PDPN/GLI2/HHLA2/BM…	72	8.01388
BP	GO:0007416	synapse assembly	56/2423	177/18670	7.41131e-11	1.4625e-08	1.07243e-08	DRD1/CUX2/ASIC2/PCDHB10/AMIGO2/LRTM2/SLIT1/EPHA7/NLGN3/ADD2/SLITRK2/CLSTN2/BDNF/NTRK3/SEMA4D/OXTR/GRIN1/SEMA4A/SNCA/LRRN3/PCDHB6/SLITRK5/SLITRK6/THBS2/NTNG2/ADGRB1/GPC4/LRFN4/DKK1/KIRREL3/SLITRK4/FZD1/SRPX2/SYNDIG1/VSTM5/MUSK/ADGRB2/GABRA2/ERBB4/ADGRB3/FLRT2/DRD2/GAP43/PCLO/CBLN2/TPBG/GRID2/NTRK2/NRXN1/LINGO2/LRRN1/SLITRK1/EPHB3/NLGN1/DNER/EFNA5	56	6.94879
BP	GO:0070663	regulation of leukocyte proliferation	65/2423	222/18670	9.90925e-11	1.89235e-08	1.38763e-08	IL13/IGF1/RIPK3/LGALS9/CD86/ZAP70/NCKAP1L/PDE5A/CLECL1/LILRB1/PRKCQ/IL12RB1/GREM1/IL12A/SASH3/LMO1/CD70/CORO1A/TNFSF9/SPN/TNFRSF21/IKZF3/NCK2/CD3E/TNFSF13B/TGFB1/CCL19/IL2/IL10/RAC2/GPR183/FCRL3/IL6/JAK3/CD24/PTPRC/IL18/CTLA4/HAVCR2/GPNMB/SYK/IL12B/CD38/PTPN22/MNDA/IL2RA/TNFRSF13C/CD22/FGF10/GSTP1/TNFRSF13B/IL1B/CD80/CARD11/SPTA1/GAL/LEP/SCGB1A1/SOX11/MZB1/PLA2G2D/HHLA2/TAC1/FOXJ1/VTCN1	65	7.56612
BP	GO:0098742	cell-cell adhesion via plasma-membrane adhesion molecules	75/2423	273/18670	1.04781e-10	1.93844e-08	1.42143e-08	REG3A/CDH22/SELE/DSG1/SPARCL1/ADIPOQ/CLDN2/PCDH20/CLDN8/CDH26/CNTN4/PCDHB10/PCDHA4/FAT2/AMIGO2/CRB2/CD84/NECTIN4/SLITRK2/CLSTN2/ITGB2/DSG2/PCDHA5/IL10/ITGAM/EMB/PCDHA10/PCDHA2/TENM3/LRRC4C/CLDN11/PCDHGA11/CDHR4/IGSF9B/PCDHB6/NTNG2/GPC4/LRFN4/PCDHGA12/FAT3/CLDN4/KIRREL3/PCDH7/TGFB2/PCDH9/DSCAML1/CLDN6/PCDHA6/DCHS2/PCDHA3/CDH18/CDH3/CDH6/NTNG1/CD177/L1CAM/CADM3/PLXNB3/TENM4/CDH11/DSC3/EPCAM/GRID2/N…	75	6.58179
BP	GO:1903039	positive regulation of leukocyte cell-cell adhesion	64/2423	218/18670	1.21698e-10	2.1832e-08	1.60091e-08	IGF1/RAG1/LGALS9/CD86/ZAP70/VAV1/NCKAP1L/CLECL1/ADAM8/LILRB1/LCK/PRKCQ/IL12RB1/IL12A/SASH3/CD70/GATA3/ITGA4/CORO1A/TNFSF9/SIRPB1/NCK2/CD3E/ITGB2/TNFSF13B/TGFB1/CCL19/CD5/IL2/MYB/TESPA1/BTLA/IL6/JAK3/RASGRP1/CD24/SIRPG/PTPRC/IL18/CTLA4/IL7R/HAVCR2/IFNG/CCR7/PTAFR/GLI3/SYK/LILRB4/IL12B/ICOS/CD27/IL2RA/TNFRSF13C/TNF/IL1B/CD80/CARD11/SPTA1/HAS2/LEP/PDCD1/GLI2/HHLA2/VTCN1	64	7.5
BP	GO:0022407	regulation of cell-cell adhesion	99/2423	403/18670	1.32903e-10	2.31408e-08	1.69688e-08	ADIPOQ/IGF1/TNR/RAG1/PLG/LGALS9/CD86/ZAP70/VAV1/JAG1/CCL28/NCKAP1L/PDE5A/CLECL1/ADAM8/LILRB1/C1QTNF1/LCK/PRKCQ/IL12RB1/IL12A/SASH3/SOX2/EPHA7/CD70/GATA3/ITGA4/CORO1A/TNFSF9/SPN/SIRPB1/TNFRSF21/NCK2/CD3E/ITGB2/TNFSF13B/TGFB1/CCL19/CD5/NEXMIF/IL2/MYB/TESPA1/IL10/BTLA/IL6/JAK3/RASGRP1/TENM3/CD24/SIRPG/PTPRC/IL18/CTLA4/IL7R/HAVCR2/IFNG/CCR7/PTAFR/GLI3/GPNMB/SYK/LILRB4/IL12B/SERPINE2/MYO10/TIGIT/PTPN2…	99	8.94484
BP	GO:0048568	embryonic organ development	103/2423	428/18670	1.98425e-10	3.35622e-08	2.46107e-08	TBX3/CLRN1/MTHFD1/GDNF/PTK7/HNF1B/PDZD7/NKX3-2/TGFB3/TEAD2/TBX1/GSC/HOXA2/CRB2/GATA3/HOXB3/HOXB7/TGFB1/TBX20/RUNX2/FOXC2/HOXB6/IL10/VAX2/EFEMP1/HOXA1/ATP6V1B1/SLC44A4/GLI3/DLX5/HOXA11/HOXB8/ROR2/TIFAB/TWIST1/CHST11/DLX6/PDGFRA/POU3F4/HOXC4/APELA/SLITRK6/FOXL2/NRK/EN2/BMP5/CXCL8/TNF/TGFB2/GLI1/FGF10/ABR/USH1G/ATOH1/MMP14/EN1/CHRNA9/PLCD3/DSCAML1/MDFI/WNT1/TFAP2A/PRRX1/FGFR1/HOXC11/FOXF2/WNT2/CTHRC…	103	9.36063
BP	GO:0050863	regulation of T cell activation	82/2423	314/18670	2.23295e-10	3.67196e-08	2.6926e-08	IGF1/RAG1/RIPK3/LGALS9/CD86/ZAP70/VAV1/NCKAP1L/PDE5A/CLECL1/ADAM8/LILRB1/LCK/PRKCQ/IL12RB1/IL12A/CD2/SASH3/LMO1/CD70/GATA3/CORO1A/TNFSF9/SPN/SIRPB1/TNFRSF21/NCK2/CD3E/TNFSF13B/TGFB1/SIT1/CCL19/HLA-DOA/CD5/IL2/MYB/TESPA1/TNFRSF18/IL10/RAC2/BTLA/IL6/JAK3/CR1/RASGRP1/CD24/SIRPG/PTPRC/IL18/CTLA4/IL7R/HAVCR2/IFNG/CCR7/CGAS/GLI3/GPNMB/SYK/LILRB4/IL12B/TIGIT/PTPN22/ICOS/CD27/LAX1/IL2RA/TNFRSF13C/IL1B/CD…	82	8.61366
BP	GO:0071804	cellular potassium ion transport	63/2423	217/18670	2.81668e-10	4.37313e-08	3.20676e-08	SLC12A1/ACTN2/LRRC52/KCNU1/SLC9C2/KCNJ8/KCNB1/KCNE2/ABCC9/TREM2/KCNMB4/LRRC26/CAV3/SLC9A5/KCNS2/AQP1/KCNQ2/KCNA3/SLC9A3/ANK2/KCNH7/KEL/KCNK10/KCNQ3/KCNN4/KCNK9/FLNA/KCNE4/P2RY12/KCNIP1/FXYD2/HCN1/KCNK15/KCNQ5/SLC24A2/KCNS1/KCNJ10/KCNH2/KCNG3/SLC9A4/LRRC38/ANK3/GAL/ATP1A4/RGS4/MTNR1B/KCNJ13/SNAP25/NALCN/KCNF1/KCNH3/KCNK12/ATP1A3/DPP10/SLC24A3/WNK2/SLC9C1/KCNV1/KCND2/KCNK2/ATP12A/HCN4/KCNJ16	63	5.66947
BP	GO:0071805	potassium ion transmembrane transport	63/2423	217/18670	2.81668e-10	4.37313e-08	3.20676e-08	SLC12A1/ACTN2/LRRC52/KCNU1/SLC9C2/KCNJ8/KCNB1/KCNE2/ABCC9/TREM2/KCNMB4/LRRC26/CAV3/SLC9A5/KCNS2/AQP1/KCNQ2/KCNA3/SLC9A3/ANK2/KCNH7/KEL/KCNK10/KCNQ3/KCNN4/KCNK9/FLNA/KCNE4/P2RY12/KCNIP1/FXYD2/HCN1/KCNK15/KCNQ5/SLC24A2/KCNS1/KCNJ10/KCNH2/KCNG3/SLC9A4/LRRC38/ANK3/GAL/ATP1A4/RGS4/MTNR1B/KCNJ13/SNAP25/NALCN/KCNF1/KCNH3/KCNK12/ATP1A3/DPP10/SLC24A3/WNK2/SLC9C1/KCNV1/KCND2/KCNK2/ATP12A/HCN4/KCNJ16	63	5.66947
BP	GO:0007159	leukocyte cell-cell adhesion	86/2423	337/18670	2.88095e-10	4.37313e-08	3.20676e-08	SELE/IGF1/RAG1/LGALS9/CD86/S100A9/ZAP70/VAV1/CCL28/NCKAP1L/PDE5A/CLECL1/ADAM8/LILRB1/LCK/PRKCQ/IL12RB1/IL12A/SASH3/CD70/GATA3/ITGA4/CORO1A/ADD2/TNFSF9/SPN/SIRPB1/TNFRSF21/NCK2/CD3E/ITGB2/TNFSF13B/TGFB1/CCL19/CD5/IL2/MYB/TESPA1/IL10/RAC2/BTLA/IL6/JAK3/RASGRP1/CD24/SIRPG/PTPRC/SEMA4D/IL18/CTLA4/IL7R/HAVCR2/IFNG/CCR7/PTAFR/GLI3/GPNMB/SYK/LILRB4/IL12B/TIGIT/PTPN22/ICOS/CD27/APOA4/LAX1/IL2RA/TNFRSF13C…	86	8.62662
BP	GO:0050900	leukocyte migration	115/2423	499/18670	2.98378e-10	4.416e-08	3.23819e-08	VEGFD/TAFA4/SAA1/SELE/CCL16/RIPK3/TREM2/CD48/CCR6/LGALS9/S100A9/ZAP70/VAV1/CNR2/CCL28/CCL11/NCKAP1L/TRPM2/ADAM8/NBL1/LCK/OLR1/FFAR2/GPR15/APOD/GREM1/IL12A/CD2/PIK3CG/CD84/HCK/GATA3/ITGA4/CXCR3/CORO1A/ADD2/PTPRO/SPN/PIK3CD/MYO1G/ITGB2/GPR18/TGFB1/SLC7A8/CCL19/ARTN/PADI2/CXCL9/TNFRSF18/IL10/RAC2/GPR183/CEACAM3/IL6/ITGAM/CCR5/FPR2/ADORA1/SLC16A3/MMP28/SIRPG/PTGER4/EMILIN1/CCR7/PTAFR/SLAMF8/S100A14/S…	115	9.7913
BP	GO:0099177	regulation of trans-synaptic signaling	104/2423	437/18670	3.18664e-10	4.6012e-08	3.374e-08	DRD1/RASGRF1/CAMK2A/ADCY8/GLUL/MME/DRD5/SYT9/ADRA1A/KCNB1/CUX2/ADIPOQ/P2RX3/CHRNA4/TNR/GDNF/CPEB3/SNCG/CNTN4/STX3/CNR2/JPH3/KCNMB4/EGR2/P2RX1/HAP1/GRM6/GRM5/NLGN3/APBA2/CLSTN2/PRKCB/GRM1/FABP5/GUCY1A1/CACNB3/BDNF/CELF4/RIMS4/PFN2/LRRC4C/ADORA1/OXTR/ADORA2B/CALB1/SNCAIP/GRIN1/ROR2/CHRNA5/PTGS2/CD38/IGSF9B/SERPINE2/RETN/SNCA/DNM1/GRM3/P2RY4/CHRNA6/NTNG2/ADGRB1/GRID2IP/CACNA1B/UNC13C/S100B/DKK1/TNF/…	104	6.86406
BP	GO:0070838	divalent metal ion transport	112/2423	483/18670	3.47038e-10	4.89158e-08	3.58693e-08	CACNA1I/DRD1/GCK/CSN2/CAMK2A/IL13/P2RX2/MT3/CACNG1/ADRA1A/STRIT1/TRPM3/HTR2B/SLC30A2/P2RX3/CHRNA4/KCNE2/RGN/JPH1/JPH3/TRPM2/FASLG/LILRB1/LCK/CAV3/RASA3/P2RX1/CBARP/PIK3CG/CD84/HAP1/GRM6/CRACR2B/RCVRN/STC2/CORO1A/ATP2A3/TGFB1/PRKCB/HOMER3/CCL19/CACNA2D1/BEST1/CACNB3/FAM155A/P2RX5/CXCL9/FCRL3/TRPC3/CCR5/ANK2/ORAI2/PTPRC/P2RY6/GRAMD2A/IFNG/ZDHHC13/CCR7/BSPRY/NIPAL4/KCNN4/GEM/HPCA/GRIN1/P2RY12/PTGS2/…	112	7.18132
BP	GO:0072511	divalent inorganic cation transport	113/2423	489/18670	3.59923e-10	4.95521e-08	3.63359e-08	CACNA1I/DRD1/GCK/CSN2/CAMK2A/IL13/P2RX2/MT3/CACNG1/ADRA1A/STRIT1/TRPM3/HTR2B/SLC30A2/P2RX3/CHRNA4/KCNE2/RGN/JPH1/JPH3/TRPM2/FASLG/LILRB1/LCK/CAV3/RASA3/P2RX1/CBARP/PIK3CG/CD84/HAP1/GRM6/CRACR2B/RCVRN/STC2/CORO1A/ATP2A3/TGFB1/PRKCB/HOMER3/CCL19/CACNA2D1/BEST1/CACNB3/FAM155A/P2RX5/CXCL9/FCRL3/TRPC3/CCR5/ANK2/ORAI2/PTPRC/P2RY6/GRAMD2A/IFNG/ZDHHC13/CCR7/BSPRY/NIPAL4/KCNN4/GEM/HPCA/GRIN1/P2RY12/PTGS2/…	113	7.24355
BP	GO:0048704	embryonic skeletal system morphogenesis	36/2423	93/18670	3.7424e-10	5.03522e-08	3.69226e-08	MTHFD1/TGFB3/TBX1/GSC/HOXA2/HOXB3/HOXB7/RUNX2/FOXC2/HOXB6/HOXA1/GLI3/HOXA11/HOXB8/TWIST1/CHST11/PDGFRA/HOXC4/MMP14/DSCAML1/MDFI/TFAP2A/PRRX1/HOXC11/MMP16/NOG/SOX11/SHOX2/EYA1/WNT9A/LHX1/SIX2/ALX1/BMP7/COL11A1/GRHL2	36	5.66667
BP	GO:0019932	second-messenger-mediated signaling	104/2423	439/18670	4.19308e-10	5.3684e-08	3.93657e-08	DRD1/ADCY8/CALML3/P2RX2/DRD5/TMEM100/SELE/MT2A/PDE11A/ADRA1A/LGR5/GCGR/HTR2B/ACKR2/P2RX3/IGF1/RGN/TCP11/TREM2/CCR6/JPH1/ZAP70/CXCR6/JPH3/PDX1/PDE5A/TRPM2/HAP1/GRM5/PDE4A/CXCR3/PLEK/PTGFR/ADGRG1/CD3E/AQP1/HOMER3/CCR4/GUCY1A1/ADCY2/ADGRE5/P2RX5/XCR1/CXCL9/MC4R/ADCY5/CCR5/ANK2/PDE10A/FPR1/PDZD3/FPR2/PTPRC/PTGER4/P2RY6/TRAT1/ADGRE1/CCR7/GPR161/CGAS/HPCA/ADORA2B/SYK/GRIN1/P2RY12/ADGRE3/ADGRE2/GPRC6A/K…	104	6.66795
BP	GO:0043583	ear development	63/2423	219/18670	4.25928e-10	5.3684e-08	3.93657e-08	LHX3/CLRN1/LGR5/USH2A/MYCL/PTK7/JAG1/PDZD7/NKX3-2/TGFB3/ROR1/TBX1/GSC/HOXA2/SOX2/GATA3/TGFB1/FGF20/SLC17A8/HOXA1/NTRK3/ATP6V1B1/SLC44A4/GLI3/DLX5/HPCA/CALB1/ROR2/TIFAB/TWIST1/DLX6/POU3F4/SLITRK6/BMP5/TGFB2/FGF10/ABR/USH1G/ATOH1/CHRNA9/WNT1/TFAP2A/PRRX1/FGFR1/CTHRC1/CXCL14/GLI2/NOG/FZD2/DDR1/MCOLN3/EYA1/ATP8A2/VANGL2/SIX2/KCNK2/HMX3/HMX2/STRA6/COL11A1/ESRP1/GABRA5/MYO3A	63	6.67737
BP	GO:0051216	cartilage development	61/2423	209/18670	4.26208e-10	5.3684e-08	3.93657e-08	RSPO2/COL7A1/GPLD1/CHADL/POR/CSGALNACT1/COL14A1/COL12A1/NKX3-2/GREM1/MGP/COL11A2/HOXB3/VWA2/TGFB1/RUNX2/COL6A2/EFEMP1/ADAMTS12/CTSK/GLI3/HOXA11/ROR2/CCN4/CHST11/HOXC4/PITX1/COL6A3/ACAN/BMP5/SCIN/WNT10B/PRRX1/FGFR1/LUM/COL1A1/LEP/FGF4/GLI2/SFRP2/NOG/SULF1/RFLNA/PTHLH/BMP3/MSX2/CER1/SHOX2/HAND2/WNT9A/BMPR1B/COMP/MMP13/ITGB8/SIX2/ALX1/BMP7/COL11A1/HMGA2/BARX2/WNT7B	61	6.52988
BP	GO:0006816	calcium ion transport	103/2423	434/18670	4.57549e-10	5.6431e-08	4.13801e-08	CACNA1I/DRD1/GCK/CSN2/CAMK2A/IL13/P2RX2/CACNG1/ADRA1A/STRIT1/TRPM3/HTR2B/P2RX3/CHRNA4/KCNE2/RGN/JPH1/JPH3/TRPM2/FASLG/LILRB1/LCK/CAV3/RASA3/P2RX1/CBARP/PIK3CG/CD84/HAP1/GRM6/CRACR2B/RCVRN/STC2/CORO1A/ATP2A3/TGFB1/PRKCB/HOMER3/CCL19/CACNA2D1/BEST1/CACNB3/FAM155A/P2RX5/CXCL9/FCRL3/TRPC3/CCR5/ANK2/ORAI2/PTPRC/P2RY6/GRAMD2A/CCR7/BSPRY/KCNN4/GEM/HPCA/GRIN1/P2RY12/PTGS2/MCUB/SNCA/RYR1/CACNB1/RRAD/CALHM…	103	6.99584
BP	GO:0007389	pattern specification process	105/2423	446/18670	5.03425e-10	6.08219e-08	4.45999e-08	ASCL1/LHX3/TBX3/NKD1/RIPPLY1/GREM2/AR/GDNF/RIPPLY3/HES4/FOXB1/TBR1/HNF1B/NBL1/NKX3-2/TBX5/EGR2/GREM1/TBX1/GSC/HOXA2/CRB2/HOXB3/HOXB7/ADGRG1/SMARCD3/TBX20/FOXC2/HOXB6/HOXC6/ITGAM/SFRP1/VAX2/MEOX1/FGF1/GPR161/IRX2/GLI3/HOXA11/HOXB8/ROR2/TIFAB/HHIP/HOXC4/NKX6-1/MLLT3/BMP5/DKK1/GLI1/FGF10/HES7/BASP1/CYP26B1/EN1/NTF4/DSCAML1/MDFI/WNT1/RFX4/BICC1/FGFR1/DNAAF4/HOXC11/ERBB4/HOXC13/RIPPLY2/WNT2/LEFTY1/LMX…	105	8.68551
BP	GO:0046651	lymphocyte proliferation	73/2423	272/18670	5.84011e-10	6.91469e-08	5.07044e-08	IL13/IGF1/RIPK3/LGALS9/CD86/ZAP70/NCKAP1L/PDE5A/CLECL1/LILRB1/PRKCQ/IL12RB1/IL12A/SASH3/PIK3CG/LMO1/CD70/CORO1A/TNFSF9/SPN/TNFRSF21/IKZF3/NCK2/CD3E/TNFSF13B/TGFB1/CCL19/IL2/DOCK2/IL10/RAC2/GPR183/FCRL3/IL6/JAK3/CD24/PTPRC/IL18/CTLA4/IL7R/HAVCR2/GPNMB/SYK/IL12B/CD38/PTPN22/MNDA/IMPDH1/IL2RA/TNFRSF13C/CD22/FGF10/TNFRSF13B/IL1B/CD80/CARD11/MS4A1/ELF4/CD19/SPTA1/GAPT/GAL/LEP/SCGB1A1/SOX11/MZB1/CD79A/…	73	8.07584
BP	GO:0050804	modulation of chemical synaptic transmission	103/2423	436/18670	6.01003e-10	6.95266e-08	5.09829e-08	DRD1/RASGRF1/CAMK2A/ADCY8/GLUL/MME/DRD5/SYT9/ADRA1A/KCNB1/CUX2/ADIPOQ/P2RX3/CHRNA4/TNR/GDNF/CPEB3/SNCG/CNTN4/STX3/CNR2/JPH3/KCNMB4/EGR2/P2RX1/HAP1/GRM6/GRM5/NLGN3/APBA2/CLSTN2/PRKCB/GRM1/GUCY1A1/CACNB3/BDNF/CELF4/RIMS4/PFN2/LRRC4C/ADORA1/OXTR/ADORA2B/CALB1/SNCAIP/GRIN1/ROR2/CHRNA5/PTGS2/CD38/IGSF9B/SERPINE2/RETN/SNCA/DNM1/GRM3/P2RY4/CHRNA6/NTNG2/ADGRB1/GRID2IP/CACNA1B/UNC13C/S100B/DKK1/TNF/SLC24A…	103	6.79877
BP	GO:0060326	cell chemotaxis	79/2423	304/18670	6.10706e-10	6.95266e-08	5.09829e-08	VEGFD/SAA2/TAFA4/SAA1/ACKR2/CCL16/SAA4/CCR6/LGALS9/S100A9/VAV1/SMOC2/CXCR6/CNR2/CCL28/CCL11/NCKAP1L/TRPM2/ADAM8/NBL1/FFAR2/PRKCQ/GREM1/IL12A/PIK3CG/CXCR3/CORO1A/PTPRO/PIK3CD/ITGB2/GPR18/CCL19/CCR4/PADI2/XCR1/CXCL9/IL10/RAC2/GPR183/IL6/CCR5/FPR2/MMP28/CCR7/SLAMF8/FGF1/S100A14/SYK/ADGRE2/PDGFRA/TNFRSF11A/ABCC1/CXCL3/STAP1/CCL22/CSF3R/CXCL8/TGFB2/CCL26/CYP19A1/GSTP1/SLIT2/IL1B/CXCR5/HGF/FGFR1/CCR8/C…	79	7.31307
BP	GO:0050870	positive regulation of T cell activation	59/2423	202/18670	7.95156e-10	8.88175e-08	6.51286e-08	IGF1/RAG1/LGALS9/CD86/ZAP70/VAV1/NCKAP1L/CLECL1/ADAM8/LILRB1/LCK/PRKCQ/IL12RB1/IL12A/SASH3/CD70/GATA3/CORO1A/TNFSF9/SIRPB1/NCK2/CD3E/TNFSF13B/TGFB1/CCL19/CD5/IL2/MYB/TESPA1/BTLA/IL6/JAK3/RASGRP1/CD24/SIRPG/PTPRC/IL18/CTLA4/IL7R/HAVCR2/IFNG/CCR7/GLI3/SYK/LILRB4/IL12B/ICOS/CD27/IL2RA/TNFRSF13C/IL1B/CD80/CARD11/SPTA1/LEP/PDCD1/GLI2/HHLA2/VTCN1	59	7.16039
BP	GO:0032943	mononuclear cell proliferation	73/2423	274/18670	8.32122e-10	9.12253e-08	6.68942e-08	IL13/IGF1/RIPK3/LGALS9/CD86/ZAP70/NCKAP1L/PDE5A/CLECL1/LILRB1/PRKCQ/IL12RB1/IL12A/SASH3/PIK3CG/LMO1/CD70/CORO1A/TNFSF9/SPN/TNFRSF21/IKZF3/NCK2/CD3E/TNFSF13B/TGFB1/CCL19/IL2/DOCK2/IL10/RAC2/GPR183/FCRL3/IL6/JAK3/CD24/PTPRC/IL18/CTLA4/IL7R/HAVCR2/GPNMB/SYK/IL12B/CD38/PTPN22/MNDA/IMPDH1/IL2RA/TNFRSF13C/CD22/FGF10/TNFRSF13B/IL1B/CD80/CARD11/MS4A1/ELF4/CD19/SPTA1/GAPT/GAL/LEP/SCGB1A1/SOX11/MZB1/CD79A/…	73	8.07584
BP	GO:0010721	negative regulation of cell development	86/2423	344/18670	8.65354e-10	9.31436e-08	6.83009e-08	ASCL1/MT3/IGF1/TNR/TERT/PI16/CNTN4/PMP22/HES4/JAG1/PLXNA3/CCL11/LILRB1/CAV3/MINAR1/HOXA2/SOX2/EPHA7/SEMA6D/NLGN3/PTPRO/RAP1GAP2/ADGRG1/TLX2/TGFB1/CRMP1/NEXMIF/SEMA3D/TRIM46/IL6/NTRK3/DPYSL3/OLIG2/SEMA4D/PITX3/ID4/GLI3/INPP5J/PRTG/FBLN1/CD38/SEMA4A/BCL11A/STAP1/NKX6-1/SPP1/G6PD/MELTF/ZNF536/DKK1/GPR173/TNF/SLIT2/IL1B/ISL2/GAL/RGS2/ERBB4/RGS4/SYT4/COL3A1/SEMA6A/NOG/TACSTD2/RFLNA/SOX11/PTHLH/ZNF365/…	86	8.19529
BP	GO:0097485	neuron projection guidance	73/2423	277/18670	1.40138e-09	1.48146e-07	1.08633e-07	LHX3/GFRA1/TNR/GDNF/CNTN4/NIBAN2/SLIT3/TBR1/PLXNA3/PRKCQ/EGR2/LRTM2/KIF5C/HOXA2/SLIT1/EPHA7/GATA3/SEMA6D/PTPRO/SPTB/PIK3CD/DPYSL4/CRMP1/ARTN/SEMA3D/BDNF/RAC2/EMB/UNC5C/SEMA4D/GLI3/DLX5/ARX/BCL11B/EPHB6/SEMA4A/EPHA10/NTNG2/ANOS1/EPHA3/SLIT2/ATOH1/ISL2/DSCAML1/SPTA1/SEMA6A/KIF5A/FLRT2/FOXD1/NTNG1/L1CAM/GLI2/PLXNB3/NOG/ISL1/GAP43/VAX1/SEMA3A/BMPR1B/LHX1/NRXN1/VANGL2/DPYSL5/EPHB3/SEMA3E/SEMA3C/TUBB3/…	73	7.60767
BP	GO:0042129	regulation of T cell proliferation	49/2423	156/18670	1.4711e-09	1.52788e-07	1.12037e-07	IGF1/RIPK3/LGALS9/CD86/ZAP70/NCKAP1L/PDE5A/CLECL1/LILRB1/PRKCQ/IL12RB1/IL12A/SASH3/LMO1/CD70/CORO1A/TNFSF9/SPN/TNFRSF21/NCK2/CD3E/TNFSF13B/TGFB1/CCL19/IL2/IL10/RAC2/IL6/JAK3/CD24/PTPRC/IL18/CTLA4/HAVCR2/GPNMB/SYK/IL12B/IL2RA/TNFRSF13C/IL1B/CD80/CARD11/SPTA1/LEP/SCGB1A1/PLA2G2D/HHLA2/FOXJ1/VTCN1	49	6.71429
BP	GO:0001503	ossification	95/2423	398/18670	1.58227e-09	1.61501e-07	1.18426e-07	RSPO2/RANBP3L/GPLD1/IGF1/CSGALNACT1/JAG1/FGR/TGFB3/EGR2/GREM1/MGP/HOXA2/SOX2/RASSF2/IBSP/GDF10/TGFB1/RUNX2/FOXC2/MRC2/AREG/IL6/XYLT1/SFRP1/PTGER4/SEMA4D/ATP6V1B1/ID4/OMD/IGFBP5/CTSK/GLI3/DLX5/GPNMB/PENK/KREMEN2/ROR2/PTGS2/CCN4/TWIST1/TNFRSF11A/SOST/PHEX/RYR1/TPH1/SPP1/BMP5/DKK1/TNF/TGFB2/GLI1/MMP14/FZD1/TNC/CHRDL1/HGF/WNT10B/TFAP2A/COL1A2/MMP2/COL1A1/RIPPLY2/LEP/RORB/CTHRC1/MMP16/GLI2/SFRP2/TMEM1…	95	8.92601
BP	GO:0001763	morphogenesis of a branching structure	57/2423	196/18670	1.83065e-09	1.83686e-07	1.34694e-07	RSPO2/ESR1/TBX3/AR/GDNF/CCL11/HNF1B/CAV3/EPHA7/ADAMTS16/HOXB7/TGFB1/TBX20/FOXC2/ERMN/AREG/IL10/FGF7/SFRP1/FGF1/GLI3/HOXA11/HHIP/BCL11A/TNF/FGF10/SLIT2/MMP14/TNC/HGF/WNT1/FGFR1/WNT2/FOXD1/GLI2/SFRP2/NOG/TACSTD2/SULF1/DRD2/MSX2/DDR1/SHOX2/SEMA3A/EYA1/LHX1/VANGL2/SPINT2/HOXD11/SIX2/SEMA3E/SEMA3C/BMP7/LAMA1/SPINT1/HOXB13/GRHL2	57	6.2253
BP	GO:0023061	signal release	106/2423	462/18670	1.93291e-09	1.90714e-07	1.39848e-07	C1QTNF3/DRD1/GCK/CAMK2A/ADCY8/REN/GLUL/TBX3/RASL10B/SYT9/ADRA1A/GPLD1/KCNB1/ADIPOQ/CHRNA4/SNCG/STX3/NIBAN2/PDX1/FFAR4/HNF1B/KCNMB4/C1QTNF1/FFAR2/P2RX1/GATA3/APBA2/PRKCB/MYB/OTOF/MC4R/IL6/ADCY5/RIMS4/PFN2/SFRP1/ADORA1/ILDR1/FAM3D/IFNG/SLC44A4/ADORA2B/SNCAIP/CHRNA5/OSM/CD38/SV2A/GPR119/RETN/SNCA/SLC2A1/P2RY4/PTPRN/CHRNA6/FOXL2/NKX6-1/SPP1/CACNA1B/SNPH/UNC13C/CTBP2/UCN3/TNF/CYP19A1/IL1B/GAD1/INHA/PR…	106	7.38177
BP	GO:0007411	axon guidance	72/2423	276/18670	2.9161e-09	2.83005e-07	2.07524e-07	LHX3/GFRA1/TNR/GDNF/CNTN4/NIBAN2/SLIT3/TBR1/PLXNA3/PRKCQ/EGR2/LRTM2/KIF5C/HOXA2/SLIT1/EPHA7/GATA3/SEMA6D/PTPRO/SPTB/PIK3CD/CRMP1/ARTN/SEMA3D/BDNF/RAC2/EMB/UNC5C/SEMA4D/GLI3/DLX5/ARX/BCL11B/EPHB6/SEMA4A/EPHA10/NTNG2/ANOS1/EPHA3/SLIT2/ATOH1/ISL2/DSCAML1/SPTA1/SEMA6A/KIF5A/FLRT2/FOXD1/NTNG1/L1CAM/GLI2/PLXNB3/NOG/ISL1/GAP43/VAX1/SEMA3A/BMPR1B/LHX1/NRXN1/VANGL2/DPYSL5/EPHB3/SEMA3E/SEMA3C/TUBB3/BMP7/LA…	72	7.54247
BP	GO:0042102	positive regulation of T cell proliferation	35/2423	95/18670	3.0895e-09	2.94997e-07	2.16317e-07	IGF1/LGALS9/CD86/ZAP70/NCKAP1L/CLECL1/PRKCQ/IL12RB1/IL12A/SASH3/CD70/CORO1A/TNFSF9/NCK2/CD3E/TNFSF13B/CCL19/IL2/IL6/JAK3/CD24/PTPRC/IL18/HAVCR2/SYK/IL12B/IL2RA/TNFRSF13C/IL1B/CD80/CARD11/SPTA1/LEP/HHLA2/VTCN1	35	5.57802
BP	GO:0070661	leukocyte proliferation	76/2423	298/18670	3.19158e-09	2.99907e-07	2.19918e-07	IL13/IGF1/RIPK3/TREM2/LGALS9/CD86/ZAP70/NCKAP1L/PDE5A/CLECL1/LILRB1/PRKCQ/IL12RB1/GREM1/IL12A/SASH3/PIK3CG/LMO1/CD70/CORO1A/TNFSF9/SPN/TNFRSF21/IKZF3/NCK2/CD3E/TNFSF13B/TGFB1/CCL19/IL2/DOCK2/IL10/RAC2/GPR183/FCRL3/IL6/JAK3/CD24/PTPRC/IL18/CTLA4/IL7R/HAVCR2/GPNMB/SYK/IL12B/CD38/PTPN22/MNDA/IMPDH1/IL2RA/TNFRSF13C/CD22/FGF10/GSTP1/TNFRSF13B/IL1B/CD80/CARD11/MS4A1/ELF4/CD19/SPTA1/GAPT/GAL/LEP/SCGB1A1…	76	8.25897
BP	GO:0048736	appendage development	53/2423	179/18670	3.36018e-09	3.06035e-07	2.24411e-07	RSPO2/TBX4/MYH3/TBX3/TBX5/GREM1/RUNX2/SALL4/GLI3/DLX5/HOXA11/KREMEN2/ROR2/TWIST1/CHST11/DLX6/PITX1/FMN1/DKK1/TGFB2/FGF10/CYP26B1/EN1/TFAP2A/PRRX1/SOX4/FGFR1/HOXC11/TFAP2B/CRABP2/HOXC13/FGF4/SP8/FRAS1/GLI2/SFRP2/NOG/SOX11/ITGB4/MSX2/FBN2/SHOX2/HOXC10/HAND2/FOXN1/WNT9A/BMPR1B/COMP/ALX1/SEMA3C/BMP7/PITX2/GRHL2	53	6.18123
BP	GO:0060173	limb development	53/2423	179/18670	3.36018e-09	3.06035e-07	2.24411e-07	RSPO2/TBX4/MYH3/TBX3/TBX5/GREM1/RUNX2/SALL4/GLI3/DLX5/HOXA11/KREMEN2/ROR2/TWIST1/CHST11/DLX6/PITX1/FMN1/DKK1/TGFB2/FGF10/CYP26B1/EN1/TFAP2A/PRRX1/SOX4/FGFR1/HOXC11/TFAP2B/CRABP2/HOXC13/FGF4/SP8/FRAS1/GLI2/SFRP2/NOG/SOX11/ITGB4/MSX2/FBN2/SHOX2/HOXC10/HAND2/FOXN1/WNT9A/BMPR1B/COMP/ALX1/SEMA3C/BMP7/PITX2/GRHL2	53	6.18123
BP	GO:0051249	regulation of lymphocyte activation	109/2423	485/18670	3.89533e-09	3.49399e-07	2.5621e-07	IL13/IGF1/RAG1/RIPK3/LGALS9/CD86/ZAP70/VAV1/NFAM1/NCKAP1L/PDE5A/CLECL1/ADAM8/LILRB1/LCK/PRKCQ/IL12RB1/IL12A/CD2/SASH3/LMO1/CD70/GATA3/CORO1A/TNFSF9/SPN/SIRPB1/TNFRSF21/IKZF3/NCK2/CD3E/TNFSF13B/TGFB1/CLEC7A/SIT1/CCL19/HLA-DOA/CD5/IL2/MYB/TESPA1/TNFRSF18/IL10/RAC2/BTLA/GPR183/FCRL3/IL6/JAK3/CR1/RASGRP1/SFRP1/SAMSN1/CD24/SIRPG/PTPRC/PGLYRP3/IL18/CTLA4/IL7R/HAVCR2/IFNG/CCR7/SLAMF8/CGAS/GLI3/GPNMB/SYK…	109	9.86561
BP	GO:0048732	gland development	100/2423	434/18670	4.38044e-09	3.87048e-07	2.83817e-07	ACER1/CYP1A1/ASCL1/CSN2/ESR1/TG/LHX3/TBX3/CSN3/SERPINC1/AR/PCK2/BAAT/RAG1/RGN/CPS1/CDO1/CRIP1/RIPK3/FOXB1/PDX1/CCL11/HNF1B/TGFB3/CAV3/TBX1/SOX2/GATA3/HOXB3/POU3F2/TGFB1/CELA1/ASNS/AREG/IL10/FGF7/SFRP1/IGSF3/ID4/SERPINB5/IGFBP5/OXTR/GLI3/BCL11B/SLC6A3/SERPINE2/PDGFRA/TNFRSF11A/TPH1/PITX1/TFCP2L1/TNF/TGFB2/GLI1/FGF10/CYP19A1/WNT10A/HRH2/TNC/PTF1A/HGF/WNT1/FGFR1/AIRE/ERBB4/WNT2/GLI2/ALOX15B/NOG/SULF…	100	6.6
BP	GO:0002703	regulation of leukocyte mediated immunity	57/2423	201/18670	5.08388e-09	4.42596e-07	3.2455e-07	IL13/C4BPA/HPX/C4BPB/RIPK3/LGALS9/SLAMF6/VAV1/LTA/IL13RA2/FGR/LILRB1/IL12RB1/IL12A/CD1C/SASH3/CD84/GATA3/ULBP2/ITGB2/TGFB1/IL2/ULBP3/SH2D1A/IL10/RAC2/IL6/ITGAM/JAK3/CR1/RASGRP1/PTPRC/IL18/CRTAM/IL7R/HAVCR2/PTAFR/KIR2DL4/ADORA2B/SYK/IL12B/ADGRE2/CD1E/TNF/ABR/IL1B/ULBP1/UNC13D/LEP/CD177/CD1B/RAET1L/CXCL6/CD1A/CRHR1/SERPINB4/FOXJ1	57	6.49021
BP	GO:0042445	hormone metabolic process	63/2423	232/18670	5.27462e-09	4.52547e-07	3.31846e-07	CYP11B2/CYP3A4/CYP1A2/CYP1A1/ACE2/ESR1/UGT1A3/TG/ADH1B/REN/MME/SULT1B1/HSD11B1/CYP2C9/ADH4/SRD5A2/CYP2C8/ADH7/UGT2B7/ADH1C/ADH6/RDH5/PPARGC1A/TTR/HSD17B6/ADH1A/POR/RDH16/CGA/TRERF1/AKR1B1/AANAT/GATA3/STC2/UGT1A8/PRLHR/CHST8/CRABP1/IFNG/DUOX1/SLC44A4/PCSK2/PDGFRA/SDR16C5/GNB3/SPP1/BMP5/TNF/CYP19A1/IL1B/CYP26B1/PCSK1N/FGFR1/KLK6/GAL/BACE2/CRABP2/SLC5A5/LEP/FOXE1/DUOXA1/DUOXA2/DUOX2	63	0.629941
BP	GO:0006836	neurotransmitter transport	70/2423	269/18670	5.38846e-09	4.5571e-07	3.34166e-07	DRD1/SLC6A2/SLC1A2/CAMK2A/SLC6A13/GLUL/SLC6A12/SYT9/ADRA1A/SLC22A1/CHRNA4/GDNF/SNCG/STX3/KCNMB4/LILRB1/SLC18A1/P2RX1/APBA2/AQP1/PRKCB/OTOF/SLC38A1/SLC38A5/SLC17A8/RIMS4/PFN2/SLC6A8/SLC44A4/ADORA2B/SYK/SNCAIP/CHRNA5/SV2A/SLC6A3/SLC6A5/SNCA/P2RY4/CHRNA6/CACNA1B/SNPH/UNC13C/CTBP2/KCNJ10/GAD1/PRKCG/DOC2A/GRM4/RGS2/STXBP5L/GABRA2/SLC6A19/RGS4/SYT4/SLC6A17/SNAP25/SLC6A6/SYNGR3/DRD2/UNC13A/PCLO/NRXN1/HT…	70	5.49805
BP	GO:0022617	extracellular matrix disassembly	31/2423	80/18670	5.95508e-09	4.96536e-07	3.64103e-07	KLK4/KLK2/CTRB1/PLG/KLKB1/KLK7/ADAM8/TGFB1/MMP3/FSCN1/MMP11/IL6/CARMIL2/MMP8/CTSK/MELTF/TIMP2/MMP1/MMP14/MMP2/FAP/MMP16/PDPN/MMP9/DDR1/MMP13/MMP7/PRSS1/MMP10/MMP12/PRSS2	31	3.77171
BP	GO:0035107	appendage morphogenesis	46/2423	148/18670	6.71915e-09	5.44896e-07	3.99564e-07	RSPO2/TBX4/MYH3/TBX3/TBX5/RUNX2/SALL4/GLI3/DLX5/HOXA11/ROR2/TWIST1/CHST11/DLX6/PITX1/FMN1/DKK1/TGFB2/FGF10/CYP26B1/EN1/TFAP2A/PRRX1/SOX4/FGFR1/HOXC11/TFAP2B/CRABP2/FGF4/SP8/FRAS1/GLI2/SFRP2/NOG/SOX11/MSX2/FBN2/SHOX2/HOXC10/HAND2/WNT9A/BMPR1B/ALX1/SEMA3C/BMP7/GRHL2	46	5.60279
BP	GO:0035108	limb morphogenesis	46/2423	148/18670	6.71915e-09	5.44896e-07	3.99564e-07	RSPO2/TBX4/MYH3/TBX3/TBX5/RUNX2/SALL4/GLI3/DLX5/HOXA11/ROR2/TWIST1/CHST11/DLX6/PITX1/FMN1/DKK1/TGFB2/FGF10/CYP26B1/EN1/TFAP2A/PRRX1/SOX4/FGFR1/HOXC11/TFAP2B/CRABP2/FGF4/SP8/FRAS1/GLI2/SFRP2/NOG/SOX11/MSX2/FBN2/SHOX2/HOXC10/HAND2/WNT9A/BMPR1B/ALX1/SEMA3C/BMP7/GRHL2	46	5.60279
BP	GO:0031341	regulation of cell killing	35/2423	98/18670	7.95685e-09	6.35196e-07	4.6578e-07	IL13/RIPK3/LGALS9/SLAMF6/VAV1/LILRB1/IL12RB1/IL12A/CD1C/ULBP2/CLEC7A/ULBP3/SH2D1A/ITGAM/RASGRP1/PTPRC/PGLYRP3/CRTAM/IL7R/HAVCR2/IFNG/KIR2DL4/SYK/IL12B/CR1L/STAP1/CD1E/ULBP1/LEP/CD1B/RAET1L/PGLYRP4/CXCL6/CD1A/SERPINB4	35	5.57802
BP	GO:0072001	renal system development	74/2423	293/18670	8.04724e-09	6.35196e-07	4.6578e-07	REN/MME/LGR5/ADIPOQ/RGN/GDNF/AKR1B1/JAG1/DCN/HNF1B/EPHA7/GATA3/ADAMTS16/PTPRO/PRKX/HOXB7/IQGAP1/TGFB1/GLIS2/FOXC2/SFRP1/CD24/FGF1/IRX2/GLI3/CALB1/HOXA11/PDGFRA/NPHS2/FMN1/PKHD1/KIRREL3/TGFB2/CEP55/FGF10/KIF26B/SLIT2/BASP1/CYP26B1/WNT1/TFAP2A/SOX4/FGFR1/HOXC11/GCNT1/HAS2/TFAP2B/FOXD1/PYGO1/FRAS1/GLI2/NOG/TACSTD2/SULF1/SOX11/ITGB4/MMP9/CER1/EPCAM/LIF/EYA1/GCNT3/LHX1/LIN28A/VANGL2/HOXD11/ITGA3/SIX2/…	74	7.20735
BP	GO:1903037	regulation of leukocyte cell-cell adhesion	76/2423	304/18670	8.18707e-09	6.37729e-07	4.67638e-07	IGF1/RAG1/LGALS9/CD86/ZAP70/VAV1/CCL28/NCKAP1L/PDE5A/CLECL1/ADAM8/LILRB1/LCK/PRKCQ/IL12RB1/IL12A/SASH3/CD70/GATA3/ITGA4/CORO1A/TNFSF9/SPN/SIRPB1/TNFRSF21/NCK2/CD3E/ITGB2/TNFSF13B/TGFB1/CCL19/CD5/IL2/MYB/TESPA1/IL10/BTLA/IL6/JAK3/RASGRP1/CD24/SIRPG/PTPRC/IL18/CTLA4/IL7R/HAVCR2/IFNG/CCR7/PTAFR/GLI3/GPNMB/SYK/LILRB4/IL12B/TIGIT/PTPN22/ICOS/CD27/LAX1/IL2RA/TNFRSF13C/TNF/IL1B/CD80/CARD11/SPTA1/HAS2/LE…	76	8.25897
BP	GO:0098656	anion transmembrane transport	73/2423	288/18670	8.60148e-09	6.61308e-07	4.84928e-07	SLC12A1/SLC1A2/SLC16A11/SLC27A5/AQP9/SLC13A3/THRSP/SLC9C2/SLC6A12/SLC13A5/FXYD1/SLC4A1/CLCN1/SLC5A6/SLC25A15/SLC16A12/LRRC8B/SLC4A8/SLC9A5/GRM5/SLC7A8/CLCA4/BEST1/SLC7A1/SLC38A1/SLC38A5/SLC9A3/SLC17A8/EMB/SLC16A3/GABRG1/SLC6A8/PTAFR/SLC44A4/SLC6A5/SLC7A7/ABCC1/SLC1A5/CLCNKB/CLDN4/SLC24A2/BEST3/KCNJ10/CLIC6/SLC9A4/GABRA4/RGS2/GABRA2/SLC6A19/RGS4/GABRR1/PDPN/GABRP/SLC13A1/SLC6A6/FOLR1/CLIC3/SLC7A4/…	73	4.79869
BP	GO:0010959	regulation of metal ion transport	92/2423	394/18670	9.13118e-09	6.93033e-07	5.08191e-07	ACTN2/LRRC52/DRD1/GCK/CAMK2A/IL13/P2RX2/CACNG1/STRIT1/FXYD1/P2RX3/KCNE2/RGN/TREM2/JPH1/JPH3/LILRB1/LRRC26/CAV3/P2RX1/CBARP/PIK3CG/CD84/HAP1/GRM6/CRACR2B/RCVRN/STC2/CORO1A/KCNS2/TGFB1/HOMER3/CACNA2D1/BEST1/CACNB3/P2RX5/CXCL9/FCRL3/TRPC3/CNTN1/ANK2/KEL/ADORA1/SCN2B/P2RY6/NKAIN1/GRAMD2A/IFNG/GEM/HPCA/FLNA/GRIN1/KCNE4/P2RY12/PTGS2/SERPINE2/SNCA/TESC/KCNIP1/CACNB1/RRAD/FXYD2/CEMIP/G6PD/CACNA1B/KCNS1/N…	92	6.88098
BP	GO:0042737	drug catabolic process	44/2423	140/18670	9.74832e-09	7.24223e-07	5.31062e-07	CYP3A4/CYP1A2/CYP2A13/CYP2E1/HPD/CYP2B6/SULT1B1/AASS/CYP2C9/TAT/CYP2A7/CYP2C8/ADH7/MT3/CYP2A6/PCK2/HGD/HP/DAO/HBD/HBM/AADAT/ALDH2/GSTZ1/POR/HAO1/SULT2A1/FMO4/NR1I2/HBQ1/CHIA/RENBP/AMPD3/DUOX1/SLC6A3/SNCA/APOA4/SULT1C4/MOXD1/HBE1/IL4I1/CHIT1/ALDH3B2/DUOX2	44	-2.11058
BP	GO:0001822	kidney development	71/2423	278/18670	9.78679e-09	7.24223e-07	5.31062e-07	REN/MME/ADIPOQ/RGN/GDNF/AKR1B1/JAG1/DCN/HNF1B/EPHA7/GATA3/ADAMTS16/PTPRO/PRKX/HOXB7/IQGAP1/TGFB1/GLIS2/FOXC2/SFRP1/CD24/FGF1/IRX2/GLI3/CALB1/HOXA11/PDGFRA/NPHS2/FMN1/PKHD1/KIRREL3/TGFB2/FGF10/KIF26B/SLIT2/BASP1/CYP26B1/WNT1/TFAP2A/SOX4/FGFR1/HOXC11/GCNT1/HAS2/TFAP2B/FOXD1/PYGO1/FRAS1/GLI2/NOG/TACSTD2/SULF1/SOX11/MMP9/CER1/EPCAM/LIF/EYA1/GCNT3/LHX1/LIN28A/VANGL2/HOXD11/ITGA3/SIX2/STRA6/BMP7/SERPIN…	71	7.23937
BP	GO:0001708	cell fate specification	35/2423	99/18670	1.07835e-08	7.8813e-07	5.77925e-07	TBX4/ASCL1/LHX3/TBX3/AR/TBR1/HNF1B/TBX5/MYL2/TBX1/GSC/SOX2/POU3F2/TBX20/FEV/NTRK3/OLIG2/GLI3/HOXA11/NKX6-1/DKK1/ATOH1/ISL2/FGFR1/FZD7/GLI2/SFRP2/TENM4/MNX1/ISL1/HOXC10/EYA1/SIX2/LBX1/ESRP1	35	4.22577
BP	GO:2000027	regulation of animal organ morphogenesis	66/2423	253/18670	1.31491e-08	9.49303e-07	6.9611e-07	RSPO2/ESR1/NKD1/AR/POR/GDNF/PTK7/JAG1/HNF1B/ROR1/TBX5/GREM1/CAV3/TBX1/ODAPH/TNFRSF11B/GATA3/HOXB7/TGFB1/RUNX2/FOXC2/DACT1/FGF7/SFRP1/FGF1/HOXA11/ROR2/TWIST1/PRICKLE1/GPC4/MLLT3/DKK1/TNF/TGFB2/GLI1/FGF10/BASP1/FZD1/WNT10A/HGF/SAPCD2/WNT1/TFAP2A/FGFR1/HOXC11/AJAP1/FZD7/WNT2/CTHRC1/SFRP2/NOG/FZD2/TACSTD2/SULF1/ISL1/AMTN/HAND2/LIF/EYA1/LHX1/PAX9/VANGL2/PSMA8/SIX2/SEMA3C/BMP7	66	6.64694
BP	GO:0018108	peptidyl-tyrosine phosphorylation	86/2423	363/18670	1.35766e-08	9.68355e-07	7.10081e-07	IL13/ADRA1A/ADIPOQ/IGF1/HPX/SLA/EPGN/TREM2/LTK/ZAP70/FGR/LCK/ROR1/GREM1/IL12A/EPHA7/HCK/GRM5/ITK/IQGAP1/NCK2/CD3E/ITGB2/TGFB1/IL2/BDNF/AREG/TNFRSF18/IL6/FGF7/JAK3/CNTN1/SFRP1/SAMSN1/ADORA1/CD24/EFEMP1/PTPRC/NTRK3/SEMA4D/IL18/LRRK1/IFNG/SYK/ROR2/IL12B/EPHB6/OSM/PDGFRA/IGF1R/EPHA10/FCGR1A/STAP1/NCF1/TNF/FGF10/EPHA3/CD80/DLG3/HGF/MUSK/FGFR1/GPRC5A/TYRO3/ERBB4/MST1R/LEP/SFRP2/ALKAL2/TGFA/DDR1/ISL1/LR…	86	8.19529
BP	GO:0042471	ear morphogenesis	39/2423	118/18670	1.40308e-08	9.88841e-07	7.25103e-07	CLRN1/PTK7/PDZD7/NKX3-2/TBX1/GSC/HOXA2/GATA3/HOXA1/ATP6V1B1/SLC44A4/DLX5/ROR2/TIFAB/TWIST1/DLX6/POU3F4/SLITRK6/FGF10/ABR/USH1G/ATOH1/CHRNA9/WNT1/TFAP2A/PRRX1/FGFR1/CTHRC1/GLI2/NOG/FZD2/EYA1/ATP8A2/VANGL2/SIX2/HMX3/HMX2/COL11A1/MYO3A	39	5.92474
BP	GO:0048839	inner ear development	54/2423	192/18670	1.74427e-08	1.21483e-06	8.90819e-07	LHX3/CLRN1/LGR5/USH2A/MYCL/PTK7/JAG1/PDZD7/TGFB3/ROR1/TBX1/SOX2/GATA3/TGFB1/FGF20/SLC17A8/HOXA1/NTRK3/ATP6V1B1/SLC44A4/GLI3/DLX5/HPCA/CALB1/ROR2/TIFAB/DLX6/POU3F4/SLITRK6/TGFB2/FGF10/ABR/USH1G/ATOH1/CHRNA9/WNT1/TFAP2A/PRRX1/FGFR1/CTHRC1/CXCL14/GLI2/FZD2/MCOLN3/EYA1/ATP8A2/VANGL2/KCNK2/HMX3/HMX2/COL11A1/ESRP1/GABRA5/MYO3A	54	5.98764
BP	GO:0061138	morphogenesis of a branching epithelium	52/2423	182/18670	1.79152e-08	1.23324e-06	9.04314e-07	RSPO2/ESR1/TBX3/AR/GDNF/CCL11/HNF1B/CAV3/ADAMTS16/HOXB7/TGFB1/TBX20/FOXC2/AREG/IL10/FGF7/SFRP1/FGF1/GLI3/HOXA11/HHIP/TNF/FGF10/SLIT2/MMP14/TNC/HGF/WNT1/FGFR1/WNT2/FOXD1/GLI2/SFRP2/NOG/TACSTD2/SULF1/MSX2/DDR1/SEMA3A/EYA1/LHX1/VANGL2/SPINT2/HOXD11/SIX2/SEMA3E/SEMA3C/BMP7/LAMA1/SPINT1/HOXB13/GRHL2	52	5.82435
BP	GO:0018212	peptidyl-tyrosine modification	86/2423	366/18670	2.0367e-08	1.38589e-06	1.01626e-06	IL13/ADRA1A/ADIPOQ/IGF1/HPX/SLA/EPGN/TREM2/LTK/ZAP70/FGR/LCK/ROR1/GREM1/IL12A/EPHA7/HCK/GRM5/ITK/IQGAP1/NCK2/CD3E/ITGB2/TGFB1/IL2/BDNF/AREG/TNFRSF18/IL6/FGF7/JAK3/CNTN1/SFRP1/SAMSN1/ADORA1/CD24/EFEMP1/PTPRC/NTRK3/SEMA4D/IL18/LRRK1/IFNG/SYK/ROR2/IL12B/EPHB6/OSM/PDGFRA/IGF1R/EPHA10/FCGR1A/STAP1/NCF1/TNF/FGF10/EPHA3/CD80/DLG3/HGF/MUSK/FGFR1/GPRC5A/TYRO3/ERBB4/MST1R/LEP/SFRP2/ALKAL2/TGFA/DDR1/ISL1/LR…	86	8.19529
BP	GO:0060402	calcium ion transport into cytosol	47/2423	158/18670	2.17259e-08	1.46156e-06	1.07174e-06	DRD1/IL13/P2RX2/ADRA1A/HTR2B/P2RX3/JPH1/JPH3/TRPM2/FASLG/LCK/RASA3/HAP1/CORO1A/TGFB1/CCL19/CACNA2D1/CACNB3/FAM155A/P2RX5/CXCL9/TRPC3/CCR5/ANK2/PTPRC/P2RY6/CCR7/GRIN1/SNCA/RYR1/CEMIP/FAM155B/GRIN2A/JSRP1/MS4A1/CD19/MCOLN2/TRPV5/UBASH3B/DRD2/MCOLN3/CALCR/HTR2C/TRDN/ITPR3/TRPV6/TRPA1	47	5.10527
BP	GO:0050714	positive regulation of protein secretion	68/2423	268/18670	2.63844e-08	1.75501e-06	1.28692e-06	C1QTNF3/GCK/ADCY8/GLUL/IL13/EXPH5/SAA1/GPLD1/HTR2B/ANG/IGF1/TREM2/LGALS9/PANX3/PDX1/FGR/PYDC1/ADAM8/TGFB3/FFAR2/CD2/GATA3/TRIM6/CLEC4E/TGFB1/CCL19/IL2/CHIA/IL10/IL6/RASGRP1/MMP8/PTGER4/CRTAM/HAVCR2/IFNG/KCNN4/ANKRD1/SYK/IL1A/OSM/CD38/TWIST1/PTPN22/NLRP7/NKX6-1/UCN3/TNF/TGFB2/TLR8/IL1B/SOX4/CRLF2/GPR27/ALOX15B/CLEC5A/DRD2/AIM2/ISL1/POSTN/CLEC6A/PAEP/GIPR/NLRP2/SLC30A8/CFTR/MMP12/VTCN1	68	5.57832
BP	GO:0042098	T cell proliferation	52/2423	184/18670	2.67363e-08	1.75866e-06	1.2896e-06	IGF1/RIPK3/LGALS9/CD86/ZAP70/NCKAP1L/PDE5A/CLECL1/LILRB1/PRKCQ/IL12RB1/IL12A/SASH3/PIK3CG/LMO1/CD70/CORO1A/TNFSF9/SPN/TNFRSF21/NCK2/CD3E/TNFSF13B/TGFB1/CCL19/IL2/DOCK2/IL10/RAC2/IL6/JAK3/CD24/PTPRC/IL18/CTLA4/HAVCR2/GPNMB/SYK/IL12B/IL2RA/TNFRSF13C/IL1B/CD80/CARD11/ELF4/SPTA1/LEP/SCGB1A1/PLA2G2D/HHLA2/FOXJ1/VTCN1	52	6.93375
BP	GO:0045619	regulation of lymphocyte differentiation	49/2423	169/18670	2.73581e-08	1.77095e-06	1.29861e-06	RAG1/LGALS9/CD86/ZAP70/NFAM1/NCKAP1L/ADAM8/IL12RB1/IL12A/CD2/SASH3/GATA3/TNFSF9/IKZF3/TGFB1/CCL19/HLA-DOA/IL2/MYB/TESPA1/TNFRSF18/FCRL3/JAK3/CR1/RASGRP1/SFRP1/PTPRC/PGLYRP3/IL18/CTLA4/IL7R/IFNG/SLAMF8/GLI3/SYK/LILRB4/IL12B/CD27/IL2RA/CD80/CARD11/CYP26B1/MMP14/INHA/GLI2/FOXN1/IRF4/PGLYRP4/FOXJ1	49	6.71429
BP	GO:0050671	positive regulation of lymphocyte proliferation	41/2423	130/18670	2.75215e-08	1.77095e-06	1.29861e-06	IL13/IGF1/LGALS9/CD86/ZAP70/NCKAP1L/CLECL1/PRKCQ/IL12RB1/IL12A/SASH3/CD70/CORO1A/TNFSF9/NCK2/CD3E/TNFSF13B/CCL19/IL2/GPR183/FCRL3/IL6/JAK3/CD24/PTPRC/IL18/HAVCR2/SYK/IL12B/CD38/IL2RA/TNFRSF13C/FGF10/IL1B/CD80/CARD11/SPTA1/LEP/HHLA2/TAC1/VTCN1	41	5.77843
BP	GO:0060993	kidney morphogenesis	33/2423	94/18670	3.42389e-08	2.17951e-06	1.5982e-06	GDNF/HNF1B/GATA3/ADAMTS16/PRKX/HOXB7/TGFB1/FGF1/IRX2/GLI3/CALB1/HOXA11/FMN1/FGF10/KIF26B/BASP1/WNT1/SOX4/GCNT1/FOXD1/FRAS1/NOG/TACSTD2/LIF/EYA1/GCNT3/LHX1/VANGL2/HOXD11/SIX2/BMP7/FOXJ1/WNT7B	33	5.39641
BP	GO:0032946	positive regulation of mononuclear cell proliferation	41/2423	131/18670	3.50857e-08	2.20965e-06	1.62031e-06	IL13/IGF1/LGALS9/CD86/ZAP70/NCKAP1L/CLECL1/PRKCQ/IL12RB1/IL12A/SASH3/CD70/CORO1A/TNFSF9/NCK2/CD3E/TNFSF13B/CCL19/IL2/GPR183/FCRL3/IL6/JAK3/CD24/PTPRC/IL18/HAVCR2/SYK/IL12B/CD38/IL2RA/TNFRSF13C/FGF10/IL1B/CD80/CARD11/SPTA1/LEP/HHLA2/TAC1/VTCN1	41	5.77843
BP	GO:1900274	regulation of phospholipase C activity	21/2423	45/18670	3.61731e-08	2.25416e-06	1.65294e-06	ESR1/SELE/ADRA1A/HTR2B/ANG/GNA15/BICD1/ITK/AVPR1B/BDNF/NTRK3/P2RY6/PTAFR/P2RY12/GPR55/PDGFRA/NTF4/FGFR1/LPAR2/LPAR1/NTRK2	21	2.4004
BP	GO:0070588	calcium ion transmembrane transport	76/2423	315/18670	4.16357e-08	2.56754e-06	1.88274e-06	CACNA1I/DRD1/IL13/CACNG1/STRIT1/TRPM3/HTR2B/KCNE2/RGN/JPH1/JPH3/TRPM2/FASLG/LCK/CAV3/RASA3/CBARP/PIK3CG/HAP1/CORO1A/ATP2A3/TGFB1/CCL19/CACNA2D1/CACNB3/FAM155A/CXCL9/TRPC3/CCR5/ANK2/ORAI2/PTPRC/P2RY6/CCR7/GEM/HPCA/GRIN1/P2RY12/MCUB/SNCA/RYR1/CACNB1/RRAD/CALHM1/CEMIP/G6PD/CACNA1B/FAM155B/SLC24A2/GRIN2A/JSRP1/CHRNA9/SLN/CD19/CACNA1G/TRPC7/MCOLN2/TRPV5/UBASH3B/STAC/NALCN/DRD2/STAC2/MCOLN3/CALCR/CACNG…	76	6.65306
BP	GO:0002793	positive regulation of peptide secretion	71/2423	288/18670	4.60757e-08	2.81204e-06	2.06203e-06	C1QTNF3/GCK/ADCY8/GLUL/IL13/EXPH5/RASL10B/SAA1/GPLD1/HTR2B/ANG/IGF1/TREM2/LGALS9/PANX3/PDX1/FGR/PYDC1/ADAM8/TGFB3/FFAR2/CD2/GATA3/TRIM6/CLEC4E/TGFB1/CCL19/IL2/CHIA/IL10/IL6/RASGRP1/ADORA1/ILDR1/MMP8/PTGER4/CRTAM/HAVCR2/IFNG/KCNN4/ANKRD1/SYK/IL1A/OSM/CD38/TWIST1/PTPN22/NLRP7/NKX6-1/UCN3/TNF/TGFB2/TLR8/IL1B/SOX4/CRLF2/GPR27/ALOX15B/CLEC5A/DRD2/AIM2/ISL1/POSTN/CLEC6A/PAEP/GIPR/NLRP2/SLC30A8/CFTR/MMP…	71	5.57787
BP	GO:0030595	leukocyte chemotaxis	59/2423	224/18670	5.26792e-08	3.18226e-06	2.3335e-06	VEGFD/TAFA4/SAA1/CCL16/CCR6/LGALS9/S100A9/VAV1/CNR2/CCL11/NCKAP1L/TRPM2/ADAM8/NBL1/FFAR2/GREM1/IL12A/PIK3CG/CXCR3/CORO1A/PTPRO/PIK3CD/ITGB2/GPR18/CCL19/PADI2/CXCL9/IL10/RAC2/GPR183/IL6/CCR5/FPR2/MMP28/CCR7/SLAMF8/S100A14/SYK/ADGRE2/TNFRSF11A/CXCL3/STAP1/CCL22/CSF3R/CXCL8/TGFB2/CCL26/CYP19A1/SLIT2/IL1B/CXCR5/CCL7/CXCL14/PF4V1/CXCL1/SCG2/CXCL6/CHGA/CXCL5	59	6.63963
BP	GO:0061448	connective tissue development	68/2423	273/18670	5.74391e-08	3.43278e-06	2.51721e-06	RSPO2/COL7A1/GPLD1/CHADL/PPARGC1A/POR/CRIP1/CSGALNACT1/COL14A1/COL12A1/NKX3-2/GREM1/MGP/COL11A2/HOXB3/VWA2/TGFB1/RUNX2/FOXC2/COL6A2/EFEMP1/ID4/ADAMTS12/CTSK/GLI3/HOXA11/ROR2/CCN4/CHST11/HOXC4/PITX1/COL6A3/ACAN/BMP5/COL5A1/SCIN/WNT10B/PRRX1/FGFR1/LUM/COL1A1/LEP/FGF4/FOXD1/GLI2/SFRP2/NOG/SULF1/RFLNA/PTHLH/BMP3/MSX2/CER1/SHOX2/HAND2/WNT9A/BMPR1B/COMP/MMP13/ITGB8/SIX2/ALX1/BMP7/COL11A1/SERPINB7/HMGA2…	68	6.791
BP	GO:0015893	drug transport	57/2423	214/18670	5.79861e-08	3.43278e-06	2.51721e-06	DRD1/SLC6A2/SLC1A2/SLC13A3/SYT9/SLC13A5/SLC22A1/CHRNA4/HBD/HBM/SLC47A1/SLC5A6/GDNF/NR1I2/SLC25A15/SLC16A12/SNCG/SLC52A1/SLC18A1/MFSD10/HBQ1/AQP1/SLC7A1/FGF20/SLC38A5/SYT3/SLC17A8/SLC52A3/NGB/SLC6A8/SLC44A4/SLC6A3/SLC6A5/RETN/SNCA/ABCC1/CHRNA6/SLC1A5/CALHM1/SLC25A24/SLC35F3/KCNJ10/GAL/RGS2/RGS4/SYT4/SLC6A17/SLC13A1/FOLR1/HBE1/DRD2/MAPK15/SLC4A11/STRA6/SYT8/TCN1/SYT13	57	3.31133
BP	GO:0010517	regulation of phospholipase activity	27/2423	70/18670	6.30576e-08	3.69605e-06	2.71026e-06	ESR1/SELE/ADRA1A/HTR2B/ANG/GNA15/BICD1/ITK/AVPR1B/BDNF/NTRK3/P2RY6/PTAFR/HPCA/P2RY12/GPR55/SNCA/PDGFRA/PLA2R1/NTF4/FGFR1/RGS2/ANXA8/LPAR2/LPAR1/NTRK2/ANXA8L1	27	3.27165
BP	GO:1904888	cranial skeletal system development	26/2423	66/18670	6.6572e-08	3.86379e-06	2.83326e-06	MTHFD1/TGFB3/TBX1/HOXA2/TGFB1/RUNX2/FOXC2/HOXA1/GLI3/TIFAB/TWIST1/CHST11/PDGFRA/TGFB2/CEP55/MMP14/TFAP2A/PRRX1/FGF4/MMP16/MSX2/LHX1/FOXE1/SIX2/FREM1/GRHL2	26	4.70679
BP	GO:0048565	digestive tract development	41/2423	134/18670	7.12321e-08	4.09412e-06	3.00216e-06	CYP1A1/ASCL1/CPS1/PDX1/HNF1B/NKX3-2/TGFB3/KLF5/MIXL1/TGFB1/DACT1/SFRP1/OXTR/GLI3/PDGFRA/CLMP/CXCL8/TNF/TGFB2/GLI1/FGF10/HRH2/COL3A1/FOXF2/FOXL1/GLI2/SFRP2/SOX11/ITGB4/SHOX2/VANGL2/CDX2/CCKBR/FOXE1/EPHB3/OVOL2/SIX2/STRA6/CLDN18/SFRP5/AGR2	41	5.46608
BP	GO:0042391	regulation of membrane potential	96/2423	434/18670	7.41312e-08	4.21977e-06	3.0943e-06	ACTN2/CACNA1I/DRD1/KCNU1/P2RX2/TAFA4/CTNNA3/KCNJ8/ADRA1A/KCNB1/CUX2/FXYD1/P2RX3/CLCN1/CHRNA4/KCNE2/TREM2/ASIC2/CNR2/DCN/KCNMB4/CAV3/P2RX1/GRM5/SLC25A36/NLGN3/DSG2/CACNA2D1/GRM1/CACNB3/P2RX5/CELF4/ANK2/RIMS4/KCNH7/ADORA1/SCN2B/GABRG1/NTRK3/CNTNAP1/KCNK10/POPDC3/KCNQ3/KCNN4/KCNK9/FLNA/GRIN1/KCNE4/CHRNA5/TCL1A/IGSF9B/SNCA/CHRNA6/HCN1/CACNA1B/KCNK15/SCN7A/UCN3/MPP2/GRIN2A/KCNJ10/KCNH2/CHRNA1/CHRNA9/S…	96	6.53197
BP	GO:0010863	positive regulation of phospholipase C activity	20/2423	43/18670	8.1997e-08	4.55877e-06	3.34288e-06	ESR1/SELE/ADRA1A/HTR2B/ANG/GNA15/ITK/AVPR1B/BDNF/NTRK3/P2RY6/PTAFR/P2RY12/GPR55/PDGFRA/NTF4/FGFR1/LPAR2/LPAR1/NTRK2	20	2.23607
BP	GO:0030326	embryonic limb morphogenesis	39/2423	125/18670	8.23966e-08	4.55877e-06	3.34288e-06	RSPO2/TBX4/MYH3/TBX3/TBX5/RUNX2/SALL4/GLI3/DLX5/HOXA11/ROR2/TWIST1/CHST11/DLX6/PITX1/DKK1/TGFB2/CYP26B1/EN1/TFAP2A/PRRX1/FGFR1/HOXC11/CRABP2/FGF4/SP8/FRAS1/GLI2/SFRP2/NOG/MSX2/FBN2/SHOX2/HOXC10/HAND2/WNT9A/ALX1/BMP7/GRHL2	39	4.96397
BP	GO:0035113	embryonic appendage morphogenesis	39/2423	125/18670	8.23966e-08	4.55877e-06	3.34288e-06	RSPO2/TBX4/MYH3/TBX3/TBX5/RUNX2/SALL4/GLI3/DLX5/HOXA11/ROR2/TWIST1/CHST11/DLX6/PITX1/DKK1/TGFB2/CYP26B1/EN1/TFAP2A/PRRX1/FGFR1/HOXC11/CRABP2/FGF4/SP8/FRAS1/GLI2/SFRP2/NOG/MSX2/FBN2/SHOX2/HOXC10/HAND2/WNT9A/ALX1/BMP7/GRHL2	39	4.96397
BP	GO:0030574	collagen catabolic process	21/2423	47/18670	9.27309e-08	5.03639e-06	3.69312e-06	ADAMTS3/MMP23B/MMP3/MMP11/MRC2/ADAMTS2/MMP28/MMP8/CTSK/MMP1/MMP14/KLK6/MMP2/FAP/MMP16/MMP9/MMP13/MMP7/MMP10/MMP12/PRSS2	21	4.58258
BP	GO:0045058	T cell selection	21/2423	47/18670	9.27309e-08	5.03639e-06	3.69312e-06	SLAMF6/ZAP70/IL12RB1/GATA3/LY9/SPN/CD3E/DOCK2/THEMIS/IL6/PTPRC/CCR7/GLI3/SYK/IL12B/BCL11B/CD3G/CARD11/AIRE/FOXN1/IRF4	21	4.58258
BP	GO:1903305	regulation of regulated secretory pathway	46/2423	160/18670	9.51738e-08	5.12208e-06	3.75595e-06	CACNA1I/DRD1/CAMK2A/IL13/SYT9/ADRA1A/KCNB1/CHRNA4/LGALS9/IL13RA2/FGR/P2RX1/CBARP/CD84/APBA2/ITGB2/PRKCB/RAC2/SYT3/ITGAM/RIMS4/PFN2/MICAL1/PTAFR/ADORA2B/SYK/CHRNA5/ADGRE2/P2RY4/CHRNA6/ABR/PRKCG/DOC2A/CACNA1G/UNC13D/STXBP5L/SYT4/CD177/DRD2/ADRA2A/NLGN1/CDK5R2/CRHR1/TRPV6/SYT8/SYT13	46	4.42326
BP	GO:0042472	inner ear morphogenesis	33/2423	98/18670	1.07761e-07	5.69596e-06	4.17676e-06	CLRN1/PTK7/PDZD7/TBX1/GATA3/HOXA1/ATP6V1B1/SLC44A4/DLX5/ROR2/TIFAB/DLX6/POU3F4/SLITRK6/FGF10/ABR/USH1G/ATOH1/CHRNA9/WNT1/TFAP2A/PRRX1/FGFR1/CTHRC1/GLI2/FZD2/EYA1/ATP8A2/VANGL2/HMX3/HMX2/COL11A1/MYO3A	33	5.39641
BP	GO:0060191	regulation of lipase activity	33/2423	98/18670	1.07761e-07	5.69596e-06	4.17676e-06	ESR1/SELE/ADRA1A/APOC3/APOA5/HTR2B/ANG/APOC1/POR/GNA15/BICD1/ITK/AVPR1B/BDNF/NTRK3/P2RY6/PTAFR/HPCA/P2RY12/GPR55/SNCA/PDGFRA/APOA4/HDAC9/PLA2R1/NTF4/FGFR1/RGS2/ANXA8/LPAR2/LPAR1/NTRK2/ANXA8L1	33	2.61116
BP	GO:0060401	cytosolic calcium ion transport	48/2423	171/18670	1.13472e-07	5.94472e-06	4.35918e-06	DRD1/IL13/P2RX2/ADRA1A/HTR2B/P2RX3/JPH1/JPH3/TRPM2/FASLG/LCK/RASA3/HAP1/CORO1A/TGFB1/CCL19/CACNA2D1/CACNB3/FAM155A/P2RX5/CXCL9/TRPC3/CCR5/ANK2/PTPRC/P2RY6/CCR7/GRIN1/MCUB/SNCA/RYR1/CEMIP/FAM155B/GRIN2A/JSRP1/MS4A1/CD19/MCOLN2/TRPV5/UBASH3B/DRD2/MCOLN3/CALCR/HTR2C/TRDN/ITPR3/TRPV6/TRPA1	48	5.19615
BP	GO:0055123	digestive system development	43/2423	146/18670	1.16531e-07	6.05141e-06	4.43742e-06	CYP1A1/ASCL1/CPS1/PDX1/HNF1B/NKX3-2/TGFB3/KLF5/MIXL1/TGFB1/CELA1/DACT1/SFRP1/OXTR/GLI3/PDGFRA/CLMP/CXCL8/TNF/TGFB2/GLI1/FGF10/HRH2/PTF1A/COL3A1/FOXF2/FOXL1/GLI2/SFRP2/SOX11/ITGB4/SHOX2/VANGL2/CDX2/CCKBR/FOXE1/EPHB3/OVOL2/SIX2/STRA6/CLDN18/SFRP5/AGR2	43	5.64245
BP	GO:0050731	positive regulation of peptidyl-tyrosine phosphorylation	52/2423	192/18670	1.22109e-07	6.28594e-06	4.60939e-06	IL13/ADRA1A/ADIPOQ/IGF1/HPX/EPGN/TREM2/GREM1/IL12A/GRM5/IQGAP1/CD3E/TGFB1/IL2/BDNF/AREG/TNFRSF18/IL6/FGF7/CNTN1/ADORA1/CD24/PTPRC/SEMA4D/IL18/LRRK1/IFNG/SYK/IL12B/OSM/FCGR1A/STAP1/NCF1/TNF/FGF10/CD80/DLG3/HGF/ERBB4/LEP/ALKAL2/TGFA/ISL1/LRP8/IL11/LIF/NTRK2/ADRA2A/BANK1/ALKAL1/EREG/EFNA5	52	5.82435
BP	GO:0001819	positive regulation of cytokine production	100/2423	464/18670	1.52017e-07	7.7581e-06	5.6889e-06	C1QTNF3/IL13/SAA1/HTR2B/ADIPOQ/TREM2/LGALS9/SLAMF6/CD86/PANX3/LTA/PYHIN1/NFAM1/FGR/PYDC1/ADAM8/LILRB1/BIRC3/FFAR2/PRKCQ/IL12RB1/IL12A/CD2/SASH3/GATA3/TRIM6/CLEC4E/LY9/SPN/CD3E/TGFB1/CLEC7A/CCL19/IL2/MYB/CHIA/IL10/HILPDA/IL6/RASGRP1/TNFRSF8/TLR7/PTPRC/MMP8/PTGER4/HPSE/IL18/CRTAM/HAVCR2/IFNG/CCR7/PTAFR/CGAS/KIR2DL4/CYBB/ADORA2B/SYK/IL1A/IL12B/PTGS2/OSM/TWIST1/TIGIT/PTPN22/NLRP7/MNDA/ZBP1/TNFRSF13C/…	100	9
BP	GO:0043588	skin development	92/2423	419/18670	1.96878e-07	9.9617e-06	7.30477e-06	REG3A/ACER1/KRTAP10-6/EXPH5/DSG1/LGR5/DKK4/LCE2D/JAG1/KRTAP5-1/KRT2/PKP1/DSG2/PI3/KRT14/KRTAP5-5/FGF7/ADAMTS2/KRT23/HPSE/IGFBP5/CTSK/KRT9/KRT36/SPRR1A/BCL11B/KRT78/SOX21/KRT5/KRT15/SLITRK5/RYR1/KRT6B/ALOX12B/DKK1/CLDN4/SPRR3/TNF/TGFB2/LTB/FGF10/COL5A1/CYP26B1/WNT10A/KLK13/EVPL/WNT10B/REG3G/GAL/TGM5/SCEL/COL1A2/TFAP2B/GJB3/HOXC13/COL1A1/KRT13/COL3A1/CDH3/SPRR1B/ABCA12/FRAS1/ALOX15B/KRT7/KRT40/KRT2…	92	7.92355
BP	GO:0050803	regulation of synapse structure or activity	58/2423	227/18670	2.1112e-07	1.05918e-05	7.76679e-06	CTNNA2/CUX2/ASIC2/ARHGAP22/AMIGO2/LRTM2/SLIT1/EPHA7/NLGN3/PTPRO/SLITRK2/CLSTN2/BDNF/IL10/SLC17A8/NTRK3/SEMA4D/OXTR/GRIN1/SEMA4A/SNCA/DNM1/LRRN3/SLITRK5/ZNF804A/SLITRK6/THBS2/NTNG2/ADGRB1/GPC4/LRFN4/DKK1/TNF/DBN1/SLITRK4/FZD1/SRPX2/SYNDIG1/VSTM5/MUSK/FRMPD4/ADGRB2/ADGRB3/FLRT2/DRD2/GAP43/LRP8/CBLN2/TPBG/GRID2/NTRK2/NRXN1/LINGO2/LRRN1/SLITRK1/EPHB3/NLGN1/EFNA5	58	7.09055
BP	GO:0001910	regulation of leukocyte mediated cytotoxicity	28/2423	78/18670	2.15046e-07	1.06396e-05	7.80187e-06	RIPK3/LGALS9/SLAMF6/VAV1/LILRB1/IL12RB1/IL12A/CD1C/ULBP2/ULBP3/SH2D1A/ITGAM/RASGRP1/PTPRC/CRTAM/IL7R/HAVCR2/KIR2DL4/IL12B/STAP1/CD1E/ULBP1/LEP/CD1B/RAET1L/CXCL6/CD1A/SERPINB4	28	5.2915
BP	GO:0050715	positive regulation of cytokine secretion	41/2423	139/18670	2.17465e-07	1.06396e-05	7.80187e-06	C1QTNF3/SAA1/HTR2B/LGALS9/PANX3/FGR/PYDC1/FFAR2/CD2/GATA3/TRIM6/CLEC4E/CCL19/CHIA/IL10/RASGRP1/MMP8/PTGER4/CRTAM/HAVCR2/IFNG/SYK/IL1A/OSM/TWIST1/PTPN22/NLRP7/TNF/TLR8/IL1B/CRLF2/ALOX15B/CLEC5A/DRD2/AIM2/POSTN/CLEC6A/PAEP/NLRP2/MMP12/VTCN1	41	5.46608
BP	GO:0070665	positive regulation of leukocyte proliferation	41/2423	139/18670	2.17465e-07	1.06396e-05	7.80187e-06	IL13/IGF1/LGALS9/CD86/ZAP70/NCKAP1L/CLECL1/PRKCQ/IL12RB1/IL12A/SASH3/CD70/CORO1A/TNFSF9/NCK2/CD3E/TNFSF13B/CCL19/IL2/GPR183/FCRL3/IL6/JAK3/CD24/PTPRC/IL18/HAVCR2/SYK/IL12B/CD38/IL2RA/TNFRSF13C/FGF10/IL1B/CD80/CARD11/SPTA1/LEP/HHLA2/TAC1/VTCN1	41	5.77843
BP	GO:0045582	positive regulation of T cell differentiation	29/2423	83/18670	2.56365e-07	1.244e-05	9.12207e-06	RAG1/LGALS9/CD86/ZAP70/NCKAP1L/ADAM8/IL12RB1/IL12A/SASH3/GATA3/TNFSF9/TGFB1/CCL19/IL2/MYB/TESPA1/RASGRP1/PTPRC/IL18/IL7R/IFNG/GLI3/SYK/LILRB4/IL12B/CD27/IL2RA/CD80/GLI2	29	5.01377
BP	GO:0045086	positive regulation of interleukin-2 biosynthetic process	10/2423	13/18670	2.62223e-07	1.26208e-05	9.25468e-06	CD86/PRKCQ/CD3E/CLEC7A/PTPRC/IL1A/IL1B/CD80/CARD11/IRF4	10	3.16228
BP	GO:0072073	kidney epithelium development	41/2423	140/18670	2.69384e-07	1.2801e-05	9.38676e-06	ADIPOQ/GDNF/JAG1/HNF1B/EPHA7/GATA3/ADAMTS16/PTPRO/HOXB7/IQGAP1/TGFB1/FOXC2/SFRP1/CD24/FGF1/IRX2/GLI3/CALB1/HOXA11/NPHS2/FMN1/KIF26B/SLIT2/BASP1/WNT1/FGFR1/TFAP2B/FOXD1/NOG/TACSTD2/CER1/EPCAM/LIF/EYA1/LHX1/HOXD11/SIX2/BMP7/FOXJ1/PROM1/WNT7B	41	5.77843
BP	GO:0060485	mesenchyme development	67/2423	278/18670	2.7029e-07	1.2801e-05	9.38676e-06	RANBP3L/TMEM100/HTR2B/GDNF/PTK7/FGF19/JAG1/TGFB3/TBX5/GREM1/TEAD2/TBX1/GSC/CRB2/GLIPR2/SEMA6D/TGFB1/SEMA3D/TBX20/FOXC2/IL6/SFRP1/PHLDB1/SEMA4D/MEOX1/SEMA4A/TWIST1/BMP5/TGFB2/FGF10/EPHA3/IL1B/BASP1/WNT10A/HGF/FGFR1/HAS2/OLFM1/ERBB4/COL1A1/FOXF2/WNT2/SEMA6A/PDPN/FOXD1/SFRP2/NOG/FOLR1/SOX11/MSX2/CER1/ISL1/HAND2/SEMA3A/DLL3/BNC2/TSPY10/OVOL2/SIX2/SEMA3E/SERPINB3/NKX2-5/ALX1/SEMA3C/BMP7/PITX2/HMGA2	67	7.208
BP	GO:0050807	regulation of synapse organization	56/2423	218/18670	2.80846e-07	1.31953e-05	9.67592e-06	CTNNA2/CUX2/ASIC2/ARHGAP22/AMIGO2/LRTM2/SLIT1/EPHA7/NLGN3/PTPRO/SLITRK2/CLSTN2/BDNF/IL10/NTRK3/SEMA4D/OXTR/GRIN1/SEMA4A/SNCA/LRRN3/SLITRK5/ZNF804A/SLITRK6/THBS2/NTNG2/ADGRB1/GPC4/LRFN4/DKK1/TNF/DBN1/SLITRK4/FZD1/SRPX2/SYNDIG1/VSTM5/MUSK/FRMPD4/ADGRB2/ADGRB3/FLRT2/DRD2/GAP43/LRP8/CBLN2/TPBG/GRID2/NTRK2/NRXN1/LINGO2/LRRN1/SLITRK1/EPHB3/NLGN1/EFNA5	56	6.94879
BP	GO:0008544	epidermis development	99/2423	464/18670	2.88651e-07	1.33789e-05	9.81057e-06	REG3A/ACER1/KRTAP10-6/COL7A1/EXPH5/DSG1/CLRN1/LGR5/DKK4/LCE2D/USH2A/MYCL/KLK7/JAG1/PDZD7/KRTAP5-1/KRT2/POU3F2/PKP1/DSG2/FABP5/PI3/KRT14/KRTAP5-5/FGF7/KRT23/HPSE/RBP2/IGFBP5/SLC44A4/CTSK/KRT9/KRT36/SPRR1A/BCL11B/KRT78/SOX21/KRT5/KRT15/SLITRK6/KRT6B/BNC1/DKK1/SPRR3/TNF/TGFB2/GLI1/FGF10/CYP26B1/ATOH1/WNT10A/KLK13/EVPL/SFRP4/NTF4/WNT10B/FGFR1/REG3G/GAL/TGM5/SCEL/CRABP2/HOXC13/KRT13/CDH3/SPRR1B/ABCA12…	99	7.53778
BP	GO:0015711	organic anion transport	102/2423	482/18670	2.89274e-07	1.33789e-05	9.81057e-06	SLCO1B3/SLC1A2/ACE2/SLC22A12/SLC16A11/SLC6A13/SLC27A5/AQP9/SLC13A3/THRSP/CA4/CA14/SLC6A12/FABP4/ABCB11/SLC22A11/G6PC/SLC13A5/GLS2/ABCB4/SLC10A1/APOC3/APOA5/SLC4A1/APOC1/SLC5A6/CA5A/CYP4A11/SLCO1A2/SLC25A15/SLC16A12/SLC4A8/SLC52A1/MFSD10/SLCO3A1/AQP1/SLC7A8/SLC7A1/CA12/SLC38A1/OSBPL10/SLC38A5/SLC17A8/SLCO5A1/EMB/ADORA1/SLC16A3/SLC52A3/ATP10B/SLC6A8/SLC44A4/KCNN4/SLC10A4/SYK/SV2A/SLC6A5/SNCA/SLC2A1…	102	3.96059
BP	GO:0048762	mesenchymal cell differentiation	56/2423	219/18670	3.30338e-07	1.5121e-05	1.1088e-05	RANBP3L/TMEM100/HTR2B/GDNF/FGF19/JAG1/TGFB3/TBX5/GREM1/TBX1/GSC/CRB2/GLIPR2/SEMA6D/TGFB1/SEMA3D/FOXC2/IL6/SFRP1/PHLDB1/SEMA4D/SEMA4A/TWIST1/BMP5/TGFB2/FGF10/EPHA3/IL1B/WNT10A/HGF/FGFR1/HAS2/OLFM1/ERBB4/COL1A1/FOXF2/WNT2/SEMA6A/PDPN/SFRP2/NOG/FOLR1/SOX11/MSX2/ISL1/HAND2/SEMA3A/OVOL2/SIX2/SEMA3E/SERPINB3/ALX1/SEMA3C/BMP7/PITX2/HMGA2	56	6.41427
BP	GO:1904062	regulation of cation transmembrane transport	78/2423	342/18670	3.36615e-07	1.5121e-05	1.1088e-05	ACTN2/LRRC52/DRD1/RASGRF1/IL13/CACNG1/STRIT1/FXYD1/KCNE2/RGN/PPARGC1A/TREM2/JPH1/JPH3/LRRC26/CAV3/CBARP/PIK3CG/HAP1/CORO1A/GRIA4/NLGN3/KCNS2/TGFB1/CACNA2D1/CACNB3/CXCL9/ANK2/KEL/SCN2B/P2RY6/IFNG/GEM/HPCA/FLNA/GRIN1/KCNE4/TWIST1/SNCA/TESC/KCNIP1/CACNB1/RRAD/FXYD2/CEMIP/G6PD/KCNS1/GRIN2A/DLG3/KCNH2/JSRP1/SLN/CD19/SCN3B/LRRC38/ANK3/GAL/RGS2/RGS4/MTNR1B/UBASH3B/STAC/SHISA9/MMP9/DRD2/STAC2/CALCR/DPP10…	78	6.34075
BP	GO:0001909	leukocyte mediated cytotoxicity	34/2423	107/18670	3.36983e-07	1.5121e-05	1.1088e-05	RIPK3/LGALS9/SLAMF6/VAV1/GZMB/KLRF2/LILRB1/IL12RB1/IL12A/CD1C/CORO1A/ULBP2/ULBP3/SH2D1A/ITGAM/RASGRP1/PTPRC/IL18/CRTAM/IL7R/HAVCR2/KIR2DL4/IL12B/STAP1/CD1E/SLAMF7/ULBP1/UNC13D/LEP/CD1B/RAET1L/CXCL6/CD1A/SERPINB4	34	5.83095
BP	GO:0030199	collagen fibril organization	22/2423	54/18670	3.37157e-07	1.5121e-05	1.1088e-05	CHADL/ADAMTS3/COL14A1/COL12A1/GREM1/COL11A2/MMP11/FOXC2/ADAMTS2/AEBP1/EMILIN1/ACAN/TGFB2/COL5A1/FMOD/LUM/COL1A2/COL1A1/COL3A1/SFRP2/COMP/COL11A1	22	4.26401
BP	GO:0070268	cornification	35/2423	112/18670	3.57967e-07	1.59336e-05	1.16839e-05	DSG1/KRT2/PKP1/DSG2/PI3/KRT14/KRT23/KRT9/KRT36/SPRR1A/KRT78/KRT5/KRT15/KRT6B/SPRR3/CYP26B1/KLK13/EVPL/TGM5/KRT13/SPRR1B/KRT7/KRT40/KRT28/KRT75/KRT17/DSC3/KRT79/KRT16/KRT83/KRT4/KRT20/KRT80/PKP3/KRT19	35	5.57802
BP	GO:0072006	nephron development	41/2423	142/18670	4.09789e-07	1.81041e-05	1.32755e-05	ADIPOQ/GDNF/JAG1/HNF1B/GATA3/ADAMTS16/PTPRO/HOXB7/IQGAP1/TGFB1/FOXC2/CD24/FGF1/IRX2/GLI3/CALB1/HOXA11/PDGFRA/NPHS2/FMN1/KIRREL3/KIF26B/BASP1/WNT1/TFAP2B/FOXD1/NOG/TACSTD2/SULF1/LIF/EYA1/LHX1/VANGL2/HOXD11/ITGA3/SIX2/BMP7/SERPINB7/FOXJ1/PROM1/WNT7B	41	5.77843
BP	GO:0051961	negative regulation of nervous system development	73/2423	315/18670	4.15053e-07	1.82009e-05	1.33464e-05	ASCL1/MT3/TNR/TERT/CNTN4/PMP22/HES4/JAG1/PLXNA3/CCL11/MINAR1/HOXA2/SLIT1/SOX2/EPHA7/SEMA6D/NLGN3/PTPRO/RAP1GAP2/TNFRSF21/ADGRG1/TLX2/TGFB1/CRMP1/NEXMIF/SEMA3D/TRIM46/IL6/NTRK3/DPYSL3/OLIG2/SEMA4D/PITX3/ID4/GPR161/GLI3/INPP5J/PRTG/CD38/SEMA4A/BCL11A/STAP1/NKX6-1/SPP1/ZNF536/DKK1/GPR173/TNF/SLIT2/IL1B/ISL2/RFX4/ERBB4/SYT4/COL3A1/SEMA6A/NOG/SOX11/ZNF365/ISL1/LPAR1/VAX1/SEMA3A/DLL3/LIN28A/NRG3/STMN2/…	73	7.60767
BP	GO:0009953	dorsal/ventral pattern formation	30/2423	90/18670	5.16451e-07	2.24808e-05	1.64849e-05	ASCL1/LHX3/GREM2/NBL1/GREM1/GSC/HOXA2/TBX20/SFRP1/VAX2/GPR161/GLI3/HOXA11/HHIP/NKX6-1/GLI1/EN1/DSCAML1/MDFI/RFX4/LMX1B/SP8/GLI2/NOG/CER1/BMPR1B/LHX1/HOXD11/OVOL2/SIX3	30	4.38178
BP	GO:0072009	nephron epithelium development	34/2423	109/18670	5.49064e-07	2.3726e-05	1.73979e-05	ADIPOQ/GDNF/JAG1/HNF1B/GATA3/ADAMTS16/PTPRO/HOXB7/IQGAP1/TGFB1/FOXC2/CD24/FGF1/IRX2/GLI3/CALB1/HOXA11/NPHS2/FMN1/KIF26B/BASP1/WNT1/TFAP2B/FOXD1/NOG/TACSTD2/LIF/EYA1/LHX1/HOXD11/SIX2/FOXJ1/PROM1/WNT7B	34	5.14496
BP	GO:0017157	regulation of exocytosis	55/2423	217/18670	5.69205e-07	2.44181e-05	1.79054e-05	CACNA1I/DRD1/CAMK2A/IL13/EXPH5/SYT9/ADRA1A/SEPTIN4/KCNB1/CHRNA4/LGALS9/IL13RA2/FGR/P2RX1/CBARP/CD84/HAP1/APBA2/ITGB2/PRKCB/RAC2/SYT3/ITGAM/RIMS4/PFN2/MICAL1/IFNG/PTAFR/ADORA2B/SYK/CHRNA5/ADGRE2/SNCA/P2RY4/CHRNA6/RAB27B/ABR/PRKCG/DOC2A/CACNA1G/UNC13D/STXBP5L/SYT4/CD177/DRD2/PCLO/ADRA2A/NLGN1/CDK5R2/CRHR1/TRPV6/SYT8/CADPS/CFTR/SYT13	55	4.7194
BP	GO:0060349	bone morphogenesis	35/2423	114/18670	5.74768e-07	2.44793e-05	1.79504e-05	COL7A1/PAPPA2/POR/CSGALNACT1/COL14A1/COL12A1/TGFB3/VWA2/TGFB1/RUNX2/COL6A2/GLI3/DLX5/HOXA11/TIFAB/TWIST1/COL6A3/CYP26B1/MMP14/SFRP4/TFAP2A/HAS2/COL1A1/RIPPLY2/FGF4/MMP16/SFRP2/TMEM119/MSX2/CER1/SHOX2/BMPR1B/COMP/MMP13/FREM1	35	4.90189
BP	GO:0050768	negative regulation of neurogenesis	69/2423	295/18670	5.95222e-07	2.51694e-05	1.84563e-05	ASCL1/MT3/TNR/TERT/CNTN4/PMP22/HES4/JAG1/PLXNA3/CCL11/MINAR1/HOXA2/SOX2/EPHA7/SEMA6D/NLGN3/PTPRO/RAP1GAP2/ADGRG1/TLX2/TGFB1/CRMP1/NEXMIF/SEMA3D/TRIM46/IL6/NTRK3/DPYSL3/OLIG2/SEMA4D/PITX3/ID4/GLI3/INPP5J/PRTG/CD38/SEMA4A/BCL11A/STAP1/NKX6-1/SPP1/ZNF536/DKK1/GPR173/TNF/SLIT2/IL1B/ISL2/ERBB4/SYT4/COL3A1/SEMA6A/NOG/SOX11/ZNF365/ISL1/LPAR1/VAX1/SEMA3A/DLL3/LIN28A/NRG3/STMN2/NLGN1/SEMA3E/SEMA3C/BMP7/LB…	69	7.34354
BP	GO:0002228	natural killer cell mediated immunity	24/2423	64/18670	6.20309e-07	2.57171e-05	1.8858e-05	LGALS9/SLAMF6/VAV1/GZMB/KLRF2/LILRB1/IL12A/CORO1A/ULBP2/ULBP3/SH2D1A/RASGRP1/IL18/CRTAM/HAVCR2/KLRC2/KIR2DL4/IL12B/SLAMF7/ULBP1/UNC13D/LEP/RAET1L/SERPINB4	24	4.89898
BP	GO:0007586	digestion	40/2423	139/18670	6.21208e-07	2.57171e-05	1.8858e-05	AMY2A/MOGAT2/CYP39A1/LRCOL1/APOA5/PPARGC1A/CTRB1/SI/AQP1/CHIA/CLPSL2/KCNN4/OXTR/ARX/TIFAB/APOA4/UCN3/INAVA/FGF10/HRH2/SLC9A4/CRACD/LEP/CLPSL1/CHIT1/GCNT3/GUCA2A/ADRA2A/SST/VSIG1/CCKBR/TAC1/MUC2/SLC5A1/CLPS/PRSS1/TFF1/PRSS2/TFF2/MUC6	40	4.11096
BP	GO:0045580	regulation of T cell differentiation	40/2423	139/18670	6.21208e-07	2.57171e-05	1.8858e-05	RAG1/LGALS9/CD86/ZAP70/NCKAP1L/ADAM8/IL12RB1/IL12A/CD2/SASH3/GATA3/TNFSF9/TGFB1/CCL19/HLA-DOA/IL2/MYB/TESPA1/TNFRSF18/JAK3/CR1/RASGRP1/PTPRC/IL18/CTLA4/IL7R/IFNG/GLI3/SYK/LILRB4/IL12B/CD27/IL2RA/CD80/CARD11/CYP26B1/GLI2/FOXN1/IRF4/FOXJ1	40	6.00833
BP	GO:0006814	sodium ion transport	55/2423	218/18670	6.66504e-07	2.74007e-05	2.00926e-05	SLC12A1/SLC13A3/SLC9C2/ABCB11/SLC13A5/SLC10A1/FXYD1/SLC5A6/ASIC2/SLC4A8/TRPM2/CAV3/SLC34A3/SLC9A5/ASIC4/TGFB1/SLC38A1/SLC9A3/SLC17A8/CNTN1/SCN2B/NKAIN1/ATP6V1B1/SLC6A8/SLC10A4/SERPINE2/TESC/SLC10A2/FXYD2/HCN1/SCN7A/SLC24A2/NKAIN4/SCN3B/SLC9A4/ANK3/ATP1A4/SLC5A5/SLC13A1/NALCN/DRD2/ATP1A3/SLC24A3/WNK2/SLC4A11/SLC9C1/FXYD3/ATP12A/NKX2-5/HCN4/SLC5A1/BPIFA1/SLC28A3/SLC34A2/SLC6A15	55	5.25876
BP	GO:0042267	natural killer cell mediated cytotoxicity	23/2423	60/18670	6.71579e-07	2.74189e-05	2.01059e-05	LGALS9/SLAMF6/VAV1/GZMB/KLRF2/LILRB1/IL12A/CORO1A/ULBP2/ULBP3/SH2D1A/RASGRP1/IL18/CRTAM/HAVCR2/KIR2DL4/IL12B/SLAMF7/ULBP1/UNC13D/LEP/RAET1L/SERPINB4	23	4.79583
BP	GO:0050663	cytokine secretion	59/2423	240/18670	6.78862e-07	2.75265e-05	2.01848e-05	C1QTNF3/CIDEA/SAA1/HTR2B/CARD17/LGALS9/PANX3/FFAR4/FGR/PYDC1/CLECL1/KLRF2/LILRB1/FFAR2/CD2/GATA3/TRIM6/CLEC4E/TNFRSF21/CCL19/CHIA/IL10/RASGRP1/MMP8/PTGER4/CRTAM/HAVCR2/IFNG/CCR7/SYK/IL1A/OSM/CCN4/TWIST1/PTPN22/NLRP7/SSC5D/HDAC9/TNF/TLR8/IL1B/CARD11/GBP5/MCOLN2/LEP/CRLF2/ALOX15B/ITGB6/CLEC5A/DRD2/AIM2/POSTN/CLEC6A/BANK1/PAEP/TLR10/NLRP2/MMP12/VTCN1	59	6.63963
BP	GO:0098739	import across plasma membrane	34/2423	110/18670	6.96541e-07	2.80512e-05	2.05695e-05	SLC12A1/SLC1A2/SLC9C2/KCNJ8/KCNE2/ABCC9/TRPM2/SLC9A5/CACNA2D1/SLC7A1/FAM155A/SLC9A3/IFNG/KCNK9/SLC6A5/SLC1A5/FXYD2/FAM155B/KCNJ10/KCNH2/SLC9A4/RGS2/ATP1A4/RGS4/TRPV5/KCNJ13/FOLR1/ATP1A3/CALCR/SLC9C1/ATP12A/TRPV6/HCN4/KCNJ16	34	3.77297
BP	GO:0060688	regulation of morphogenesis of a branching structure	22/2423	56/18670	7.13345e-07	2.85338e-05	2.09234e-05	ESR1/AR/GDNF/HNF1B/CAV3/HOXB7/TGFB1/FGF7/SFRP1/BCL11A/TNF/FGF10/HGF/FGFR1/WNT2/NOG/TACSTD2/SULF1/SHOX2/LHX1/SIX2/BMP7	22	3.41121
BP	GO:0032963	collagen metabolic process	35/2423	115/18670	7.24119e-07	2.87704e-05	2.10969e-05	ADAMTS3/TGFB3/MMP23B/TGFB1/MMP3/MMP11/MYB/MRC2/P3H2/IL6/ADAMTS2/LARP6/MMP28/MMP8/MFAP4/EMILIN1/CTSK/P3H3/MMP1/COL5A1/MMP14/KLK6/COL1A2/MMP2/COL1A1/FAP/MMP16/MMP9/MMP13/CREB3L1/MMP7/SERPINB7/MMP10/MMP12/PRSS2	35	5.91608
BP	GO:0006936	muscle contraction	80/2423	360/18670	7.31681e-07	2.8877e-05	2.11751e-05	ACTN2/DRD1/ACE2/MYH3/P2RX2/MLN/CTNNA3/KCNJ8/ADRA1A/STRIT1/HTR2B/FXYD1/P2RX3/CLCN1/KCNE2/LMOD2/GDNF/ANKRD2/HTR7/PDE5A/NEB/MYL2/CAV3/P2RX1/PIK3CG/MYH2/CCDC78/MYH6/CRYAB/TNNI2/DSG2/CACNA2D1/DES/TBX20/GUCY1A1/ANK2/ADORA1/SCN2B/PROK2/SLC6A8/PTAFR/OXTR/ADORA2B/FLNA/KCNE4/UTS2/TIFAB/PTGS2/CD38/MYOF/RYR1/TRIM72/TRIM63/TNNI3/SCN7A/MYH7/KCNH2/JSRP1/CHRNA1/SCN3B/CACNA1G/SSPN/RGS2/SPHK1/STAC/MYH13/MYBPC2/SUL…	80	5.14296
BP	GO:0051897	positive regulation of protein kinase B signaling	47/2423	176/18670	7.53768e-07	2.95517e-05	2.16699e-05	ESR1/EPGN/FGF19/CD86/VAV1/ADAM8/C1QTNF1/LCK/PIK3CG/GATA3/PIK3CD/TGFB1/CCL19/AREG/FGF20/RAC2/FGF7/MEIS3/TRAT1/HPSE/IL18/TSPYL5/IGFBP5/CCR7/FGF1/P2RY12/OSM/ICOS/PDGFRA/IGF1R/TNF/F3/FGF10/CD80/CD19/HGF/FGFR1/ERBB4/MST1R/LEP/FGF4/FGF23/TGFA/CALCR/LIN28A/FGF5/EREG	47	6.56392
BP	GO:0097553	calcium ion transmembrane import into cytosol	40/2423	140/18670	7.61937e-07	2.96754e-05	2.17606e-05	DRD1/IL13/HTR2B/JPH1/JPH3/TRPM2/FASLG/LCK/RASA3/HAP1/CORO1A/TGFB1/CCL19/CACNA2D1/FAM155A/CXCL9/CCR5/ANK2/PTPRC/P2RY6/CCR7/GRIN1/SNCA/RYR1/CEMIP/FAM155B/GRIN2A/JSRP1/CD19/MCOLN2/TRPV5/UBASH3B/DRD2/MCOLN3/CALCR/HTR2C/TRDN/ITPR3/TRPV6/TRPA1	40	5.37587
BP	GO:0048167	regulation of synaptic plasticity	49/2423	187/18670	8.13594e-07	3.14802e-05	2.3084e-05	DRD1/RASGRF1/CAMK2A/ADCY8/MME/DRD5/KCNB1/P2RX3/TNR/CPEB3/CNTN4/STX3/JPH3/EGR2/GRM5/NLGN3/RIMS4/ADORA1/CALB1/GRIN1/PTGS2/CD38/SERPINE2/SNCA/ADGRB1/GRID2IP/UNC13C/S100B/SLC24A2/MPP2/GRIN2A/KCNJ10/DBN1/HRH2/MAP1A/SYT4/CALB2/SNAP25/SHISA9/DRD2/SCTR/UNC13A/GRID2/NTRK2/CHRNA7/NLGN1/IGSF11/ITPR3/CRHR1	49	4.14286
BP	GO:0009410	response to xenobiotic stimulus	68/2423	292/18670	8.47691e-07	3.25866e-05	2.38953e-05	CYP3A4/CYP1A2/CYP1A1/GSTM1/DRD1/ALDH3A1/CYP2A13/CYP2E1/ADCY8/UGT1A3/CYP2B6/GLYAT/SULT1B1/DRD5/CYP2C9/CYP2A7/CYP2C8/CYP2A6/UGT1A4/ABCB4/PCK2/ACSM2B/FMO3/CES2/BAAT/NAT2/PPARGC1A/CPS1/POR/CDO1/NR1I2/CES3/APOBEC3A/CNR2/PTGS1/UGT1A8/AQP1/TGFB1/PITX3/RGS17/PTAFR/OXTR/UGT1A5/HPCA/PENK/GRIN1/SLC6A3/SNCA/SLITRK5/RYR1/FIBIN/HDAC9/GRIN2A/GSTP1/CYP26B1/PRKCG/DPEP1/RGS2/RGS4/SCGB1A1/DRD2/ARNT2/TACR3/TAC1/CRHR…	68	0.485071
BP	GO:0048645	animal organ formation	23/2423	61/18670	9.46314e-07	3.61431e-05	2.65032e-05	AR/GDNF/TBR1/NKX3-2/TBX5/SMARCD3/FGF1/GLI3/HOXA11/DKK1/FGF10/NTF4/FGFR1/HOXC11/WNT2/GLI2/NOG/FOLR1/SULF1/ISL1/HAND2/EYA1/BMP7	23	3.96177
BP	GO:0002696	positive regulation of leukocyte activation	83/2423	380/18670	9.63675e-07	3.65702e-05	2.68164e-05	IL13/IGF1/RAG1/TREM2/LGALS9/CD86/ZAP70/VAV1/FGR/NCKAP1L/CLECL1/ADAM8/LILRB1/LCK/PRKCQ/IL12RB1/IL12A/CD2/SASH3/CD70/GATA3/CORO1A/TNFSF9/SIRPB1/NCK2/CD3E/ITGB2/TNFSF13B/TGFB1/CLEC7A/CCL19/CD5/IL2/MYB/TESPA1/IL10/BTLA/GPR183/FCRL3/IL6/ITGAM/JAK3/RASGRP1/CD24/SIRPG/PTPRC/MMP8/IL18/CTLA4/IL7R/HAVCR2/IFNG/CCR7/PTAFR/GLI3/ADORA2B/SYK/LILRB4/TAFA3/IL12B/CD38/ICOS/CD27/STAP1/IL2RA/TNFRSF13C/FGF10/IL1B/CD8…	83	8.45185
BP	GO:0002699	positive regulation of immune effector process	54/2423	216/18670	1.1385e-06	4.29295e-05	3.14796e-05	IL13/C6/HPX/LGALS9/SLAMF6/CD86/KLK7/VAV1/LTA/IL13RA2/FGR/LILRB1/FFAR2/IL12RB1/IL12A/CD1C/SASH3/CD84/GATA3/TRIM6/ULBP2/ITGB2/TGFB1/CCL19/IL2/ULBP3/SH2D1A/MYB/RAC2/IL6/ITGAM/RASGRP1/PTPRC/IL18/CRTAM/IFNG/PTAFR/KIR2DL4/ADORA2B/SYK/IL12B/ADGRE2/CD1E/TNF/IL1B/CD80/ULBP1/UNC13D/CD177/CD1B/RAET1L/MZB1/CD1A/CRHR1	54	6.53197
BP	GO:0001906	cell killing	45/2423	168/18670	1.17323e-06	4.36826e-05	3.20318e-05	DEFB132/IL13/RIPK3/LGALS9/SLAMF6/VAV1/GZMB/KLRF2/LILRB1/IL12RB1/IL12A/CD1C/CORO1A/ULBP2/CLEC7A/ULBP3/SH2D1A/ITGAM/RASGRP1/PTPRC/PGLYRP3/IL18/CRTAM/IL7R/HAVCR2/IFNG/KIR2DL4/SYK/IL12B/CR1L/STAP1/CD1E/SLAMF7/ULBP1/UNC13D/REG3G/LEP/CD1B/RAET1L/PGLYRP4/CXCL6/CD1A/CHGA/SERPINB4/DEFA5	45	6.11192
BP	GO:0007156	homophilic cell adhesion via plasma membrane adhesion molecules	45/2423	168/18670	1.17323e-06	4.36826e-05	3.20318e-05	CDH22/DSG1/PCDH20/CDH26/CNTN4/PCDHB10/PCDHA4/FAT2/AMIGO2/CD84/NECTIN4/CLSTN2/DSG2/PCDHA5/EMB/PCDHA10/PCDHA2/TENM3/PCDHGA11/CDHR4/IGSF9B/PCDHB6/PCDHGA12/FAT3/KIRREL3/PCDH7/PCDH9/DSCAML1/PCDHA6/DCHS2/PCDHA3/CDH18/CDH3/CDH6/L1CAM/CADM3/PLXNB3/CDH11/DSC3/CEACAM5/ANXA3/IGSF11/CEACAM6/CDH17/CDH10	45	5.81378
BP	GO:0050708	regulation of protein secretion	98/2423	472/18670	1.21573e-06	4.49822e-05	3.29848e-05	C1QTNF3/GCK/ADCY8/CIDEA/GLUL/IL13/EXPH5/SYT9/SAA1/GPLD1/KCNB1/HTR2B/ANG/IGF1/CARD17/TREM2/LGALS9/PANX3/PDX1/FFAR4/FGR/PYDC1/ADAM8/LILRB1/TGFB3/FFAR2/CD2/GATA3/TRIM6/CLEC4E/TNFRSF21/TGFB1/CCL19/IL2/CHIA/IL10/IL6/ADCY5/RASGRP1/SFRP1/MMP8/PTGER4/FAM3D/CRTAM/HAVCR2/IFNG/CCR7/KCNN4/ANKRD1/SYK/IL1A/OSM/CD38/CCN4/TWIST1/PTPN22/SLC2A1/NLRP7/NKX6-1/SSC5D/UCN3/HDAC9/TNF/CD22/TGFB2/TLR8/IL1B/SOX4/STXBP5L/TF…	98	7.07107
BP	GO:0050867	positive regulation of cell activation	85/2423	394/18670	1.22519e-06	4.50505e-05	3.30349e-05	IL13/IGF1/RAG1/TREM2/LGALS9/CD86/ZAP70/VAV1/FGR/NCKAP1L/CLECL1/ADAM8/LILRB1/LCK/PRKCQ/IL12RB1/IL12A/CD2/SASH3/CD70/GATA3/PLEK/CORO1A/TNFSF9/SIRPB1/NCK2/CD3E/ITGB2/TNFSF13B/TGFB1/CLEC7A/CCL19/CD5/IL2/MYB/TESPA1/IL10/BTLA/GPR183/FCRL3/IL6/ITGAM/JAK3/RASGRP1/CD24/SIRPG/PTPRC/MMP8/IL18/CTLA4/IL7R/HAVCR2/IFNG/CCR7/PTAFR/GLI3/ADORA2B/SYK/LILRB4/TAFA3/IL12B/CD38/ICOS/CD27/STAP1/IL2RA/TNFRSF13C/FGF10/IL1…	85	8.56875
BP	GO:0010951	negative regulation of endopeptidase activity	60/2423	250/18670	1.29182e-06	4.72074e-05	3.46165e-05	SMR3A/SMR3B/OPRPN/CSN2/COL7A1/SERPINC1/MT3/RAG1/LPA/WFDC5/POR/FETUB/CARD17/TNFAIP8/BIRC3/CRB2/CRYAB/SPINK4/AQP1/SERPINI2/PI3/LXN/RENBP/CR1/COL28A1/SERPINB5/CST2/MICAL1/TFPI2/PTGS2/SERPINE2/SNCA/ITIH6/NLRP7/CD27/COL6A3/ANOS1/TIMP2/DPEP1/HGF/PCSK1N/LCN1/PLAUR/TFAP2B/ANXA8/SFRP2/MMP9/CST6/PAPLN/SPINK13/WNT9A/BIRC7/CST8/SPINT2/ANXA8L1/SERPINB3/SPINT1/SERPINB7/SERPINB4/ITIH5	60	4.64758
BP	GO:0050920	regulation of chemotaxis	54/2423	217/18670	1.3271e-06	4.79052e-05	3.51282e-05	VEGFD/TREM2/CCR6/LGALS9/STX3/SMOC2/ADGRA2/TBR1/PLXNA3/NCKAP1L/NBL1/GREM1/IL12A/SEMA6D/PTPRO/GPR18/TGFB1/CCL19/ARTN/CCR4/PADI2/SEMA3D/RAC2/GPR183/IL6/FPR2/MMP28/NTRK3/SEMA4D/CCR7/SLAMF8/FGF1/S100A14/P2RY12/SEMA4A/PDGFRA/STAP1/CXCL8/F3/CCL26/FGF10/CYP19A1/GSTP1/SLIT2/FGFR1/CCL7/SEMA6A/CXCL14/FGF4/LPAR1/SEMA3A/SCG2/SEMA3E/SEMA3C	54	7.0763
BP	GO:0060348	bone development	54/2423	217/18670	1.3271e-06	4.79052e-05	3.51282e-05	RANBP3L/COL7A1/PAPPA2/IGF1/RGN/POR/CSGALNACT1/COL14A1/COL12A1/LILRB1/TGFB3/GREM1/VWA2/TGFB1/RUNX2/COL6A2/XYLT1/PTPRC/PTGER4/SEMA4D/LRRK1/GLI3/DLX5/HOXA11/TIFAB/CCN4/TWIST1/PHEX/RYR1/COL6A3/CYP26B1/MMP14/SFRP4/WNT1/TFAP2A/HAS2/COL1A1/RIPPLY2/LEP/FGF4/MMP16/SFRP2/TMEM119/SULF1/RFLNA/MSX2/CER1/SHOX2/BMPR1B/COMP/MMP13/FREM1/PITX2/CLDN18	54	5.71548
BP	GO:0048665	neuron fate specification	16/2423	34/18670	1.34256e-06	4.81693e-05	3.53219e-05	ASCL1/LHX3/POU3F2/FEV/NTRK3/GLI3/NKX6-1/ATOH1/ISL2/GLI2/MNX1/ISL1/HOXC10/EYA1/LBX1/ESRP1	16	3
BP	GO:0002062	chondrocyte differentiation	36/2423	123/18670	1.43081e-06	5.07163e-05	3.71895e-05	COL7A1/GPLD1/CHADL/POR/COL14A1/COL12A1/NKX3-2/GREM1/VWA2/TGFB1/RUNX2/COL6A2/EFEMP1/ADAMTS12/GLI3/HOXA11/CCN4/CHST11/COL6A3/ACAN/SCIN/WNT10B/FGFR1/GLI2/SFRP2/SULF1/RFLNA/PTHLH/MSX2/SHOX2/WNT9A/BMPR1B/COMP/SIX2/COL11A1/HMGA2	36	4.66667
BP	GO:0010466	negative regulation of peptidase activity	62/2423	262/18670	1.43925e-06	5.07163e-05	3.71895e-05	SMR3A/SMR3B/OPRPN/CSN2/COL7A1/SERPINC1/MT3/RAG1/LPA/WFDC5/POR/FETUB/CARD17/PI16/TNFAIP8/BIRC3/CRB2/CRYAB/SPINK4/AQP1/SERPINI2/PI3/LXN/RENBP/WFDC10B/CR1/COL28A1/SERPINB5/CST2/MICAL1/TFPI2/PTGS2/SERPINE2/SNCA/ITIH6/NLRP7/CD27/COL6A3/ANOS1/TIMP2/DPEP1/HGF/PCSK1N/LCN1/PLAUR/TFAP2B/ANXA8/SFRP2/MMP9/CST6/PAPLN/SPINK13/WNT9A/BIRC7/CST8/SPINT2/ANXA8L1/SERPINB3/SPINT1/SERPINB7/SERPINB4/ITIH5	62	4.826
BP	GO:0015850	organic hydroxy compound transport	62/2423	262/18670	1.43925e-06	5.07163e-05	3.71895e-05	DRD1/SLC6A2/SLCO1B3/SLC27A5/AQP9/REN/SYT9/ABCB11/ABCB4/KCNB1/SLC10A1/APOC3/APOA5/ADIPOQ/SLC22A1/CHRNA4/APOC1/SLCO1A2/GDNF/PON1/LCAT/SNCG/LILRB1/SLC18A1/C1QTNF1/P2RX1/MFSD10/AQP1/MYB/FGF20/OSBPL10/SYT3/EMB/AQP10/SLC16A3/OXTR/SLC10A4/SYK/P2RY12/SLC6A3/SNCA/PLTP/APOA4/CHRNA6/SLC10A2/SPP1/CYP19A1/GRAMD1B/GAL/SYT4/LEP/ABCA12/DRD2/ADRA2A/MAPK15/TAC1/CRHR1/STRA6/SYT8/CHGA/CFTR/SYT13	62	2.54
BP	GO:0006633	fatty acid biosynthetic process	44/2423	164/18670	1.46353e-06	5.10326e-05	3.74215e-05	CYP3A4/CYP1A2/CYP1A1/ABHD1/CYP2E1/TECRL/CYP2C9/CYP2C8/ACSM5/PDK4/ACADL/ACSM2A/ACSM2B/CYP7A1/APOC3/APOA5/ADIPOQ/RGN/APOC1/ACSM6/ACSM3/HACD4/ACSS1/PTGS1/PLP1/FABP5/ACOT11/PTGES/PTGS2/APOA4/ALOX5AP/ALOX12B/IL1B/PTGIS/HACD1/ALOX15B/ELOVL7/PTGDS/ALOX5/ELOVL4/PLA2G4F/SCD5/ALOXE3/FA2H	44	0.301511
BP	GO:0045621	positive regulation of lymphocyte differentiation	30/2423	94/18670	1.46546e-06	5.10326e-05	3.74215e-05	RAG1/LGALS9/CD86/ZAP70/NCKAP1L/ADAM8/IL12RB1/IL12A/SASH3/GATA3/TNFSF9/TGFB1/CCL19/IL2/MYB/TESPA1/RASGRP1/PTPRC/IL18/IL7R/IFNG/GLI3/SYK/LILRB4/IL12B/CD27/IL2RA/CD80/MMP14/GLI2	30	5.11208
BP	GO:0022898	regulation of transmembrane transporter activity	63/2423	268/18670	1.51042e-06	5.22907e-05	3.8344e-05	ACTN2/LRRC52/RASGRF1/STRIT1/FXYD1/KCNE2/RGN/PPARGC1A/TREM2/JPH1/JPH3/LRRC26/CAV3/CBARP/HAP1/GRM5/GRIA4/NLGN3/KCNS2/CACNA2D1/CACNB3/ANK2/SCN2B/P2RY6/IFNG/PTAFR/GEM/HPCA/GRIN1/KCNE4/TWIST1/SNCA/TESC/CACNB1/RRAD/FXYD2/KCNS1/GRIN2A/DLG3/JSRP1/SLN/SCN3B/LRRC38/ANK3/GAL/MTNR1B/STAC/SHISA9/MMP9/DRD2/STAC2/GRIA2/ADRA2A/WNK2/TRDN/ANO9/ANXA3/FXYD3/NLGN1/CRHR1/HTR3A/CFTR/NEFL	63	5.92144
BP	GO:0017156	calcium ion regulated exocytosis	42/2423	154/18670	1.58037e-06	5.43941e-05	3.98864e-05	CACNA1I/DRD1/CAMK2A/SYT9/ADRA1A/KCNB1/CHRNA4/STX3/P2RX1/CBARP/APBA2/PRKCB/OTOF/SYT3/RIMS4/PFN2/ADORA2B/CHRNA5/SV2A/SNCA/P2RY4/CHRNA6/SNPH/UNC13C/CTBP2/PRKCG/SCIN/DOC2A/CACNA1G/STXBP5L/SYT4/SNAP25/DRD2/UNC13A/PCLO/ADRA2A/NLGN1/CDK5R2/TRPV6/SYT8/CADPS/SYT13	42	4.32049
BP	GO:0001706	endoderm formation	20/2423	50/18670	1.62219e-06	5.53836e-05	4.0612e-05	COL7A1/COL8A1/COL12A1/HNF1B/SOX2/MIXL1/LAMB1/ITGA4/ITGB2/TBX20/MMP8/DKK1/COL5A1/MMP14/MMP2/NOG/MMP9/LHX1/COL11A1/HMGA2	20	4.02492
BP	GO:0042108	positive regulation of cytokine biosynthetic process	24/2423	67/18670	1.62783e-06	5.53836e-05	4.0612e-05	CD86/PRKCQ/SPN/CD3E/CLEC7A/IL6/TNFRSF8/TLR7/PTPRC/IFNG/PTAFR/CYBB/SYK/IL1A/IL12B/TNFRSF13C/TNF/LTB/TLR8/IL1B/CD80/CARD11/IRF4/EREG	24	4.89898
BP	GO:0060560	developmental growth involved in morphogenesis	57/2423	235/18670	1.64831e-06	5.576e-05	4.0888e-05	ESR1/NKD1/MT3/TNR/PTK7/SLIT3/PLXNA3/CCL11/HNF1B/SLIT1/EPHA7/LIMK1/ISLR2/ITGA4/SEMA6D/NLGN3/IQGAP1/TGFB1/SEMA3D/BDNF/AREG/TRIM46/SYT3/SFRP1/NTRK3/SEMA4D/FGF1/SEMA4A/BCL11A/FMN1/NKX6-1/SPP1/FGF10/KIF26B/SLIT2/DBN1/DCLK1/TNC/GAL/OLFM1/CRABP2/SYT4/SEMA6A/RASAL1/L1CAM/SFRP2/DDR1/UNC13A/SEMA3A/LHX1/POSTN/VANGL2/SEMA3E/LPAR3/SEMA3C/EFNA5/WNT7B	57	6.49021
BP	GO:0002791	regulation of peptide secretion	102/2423	500/18670	1.72222e-06	5.79293e-05	4.24787e-05	C1QTNF3/GCK/ADCY8/CIDEA/GLUL/IL13/EXPH5/RASL10B/SYT9/SAA1/GPLD1/KCNB1/HTR2B/ANG/IGF1/CARD17/TREM2/LGALS9/PANX3/PDX1/FFAR4/FGR/PYDC1/ADAM8/LILRB1/TGFB3/FFAR2/CD2/GATA3/TRIM6/CLEC4E/TNFRSF21/TGFB1/CCL19/IL2/CHIA/IL10/IL6/ADCY5/RASGRP1/SFRP1/ADORA1/ILDR1/MMP8/PTGER4/FAM3D/CRTAM/HAVCR2/IFNG/CCR7/KCNN4/ANKRD1/SYK/IL1A/OSM/CD38/CCN4/TWIST1/PTPN22/SLC2A1/NLRP7/NKX6-1/SSC5D/UCN3/HDAC9/TNF/CD22/TGFB2/TLR8…	102	7.12906
BP	GO:0003206	cardiac chamber morphogenesis	37/2423	129/18670	1.7615e-06	5.89156e-05	4.3202e-05	TBX3/SLIT3/JAG1/TBX5/MYL2/CAV3/TBX1/GATA3/MYH6/TGFB1/SMARCD3/TBX20/FOXC2/TNNI3/BMP5/TGFB2/MYH7/SLIT2/FZD1/SOX4/WNT2/SFRP2/NOG/FZD2/SOX11/MSX2/NPY5R/SHOX2/ISL1/HAND2/VANGL2/OVOL2/NKX2-5/SEMA3C/BMP7/COL11A1/GRHL2	37	5.75396
BP	GO:0007202	activation of phospholipase C activity	15/2423	31/18670	1.84984e-06	6.15227e-05	4.51137e-05	SELE/ADRA1A/HTR2B/ANG/GNA15/ITK/AVPR1B/BDNF/P2RY6/P2RY12/GPR55/NTF4/LPAR2/LPAR1/NTRK2	15	1.80739
BP	GO:0001649	osteoblast differentiation	55/2423	225/18670	1.92901e-06	6.37974e-05	4.67817e-05	RSPO2/RANBP3L/IGF1/JAG1/GREM1/HOXA2/SOX2/RASSF2/IBSP/GDF10/RUNX2/MRC2/AREG/IL6/SFRP1/SEMA4D/ID4/IGFBP5/GLI3/DLX5/GPNMB/PENK/CCN4/TWIST1/SPP1/TNF/GLI1/FZD1/TNC/HGF/WNT10B/COL1A1/RORB/CTHRC1/GLI2/SFRP2/TMEM119/NOG/SOX11/FGF23/CLEC5A/PTHLH/BMP3/MSX2/GLIS1/FBN2/SHOX2/HAND2/BMPR1B/VCAN/CREB3L1/BMP7/NELL1/CYP24A1/WNT7B	55	6.60716
BP	GO:0009914	hormone transport	72/2423	322/18670	2.03403e-06	6.65273e-05	4.87835e-05	C1QTNF3/GCK/ADCY8/REN/GLUL/TBX3/RASL10B/SYT9/GPLD1/KCNB1/ADIPOQ/SLC22A1/TTR/NIBAN2/PDX1/FFAR4/HNF1B/C1QTNF1/FFAR2/GATA3/MYB/MC4R/IL6/ADCY5/SFRP1/ADORA1/ILDR1/FAM3D/IFNG/SLC44A4/OSM/CD38/GPR119/RETN/SLC2A1/PTPRN/FOXL2/NKX6-1/SPP1/UCN3/TNF/CYP19A1/IL1B/INHA/SOX4/FGFR1/GAL/STXBP5L/TFAP2B/MTNR1B/LEP/SNAP25/GPR27/FOXD1/SOX11/FGF23/DRD2/ISL1/PCLO/IL11/LIF/ADRA2A/HTR2C/ITPR3/TAC1/CRHR1/GIPR/EPHA5/CHGA/S…	72	5.42115
BP	GO:0060562	epithelial tube morphogenesis	72/2423	322/18670	2.03403e-06	6.65273e-05	4.87835e-05	RSPO2/ESR1/TBX3/AR/LGR5/MTHFD1/GDNF/PTK7/CCL11/HNF1B/TEAD2/CAV3/TBX1/EPHA7/GATA3/ADAMTS16/PRKX/HOXB7/TGFB1/TBX20/FOXC2/AREG/SALL4/SFRP1/ADAMTS12/FGF1/IRX2/GLI3/HOXA11/TWIST1/PRICKLE1/HHIP/FMN1/BMP5/TNF/TGFB2/FGF10/KIF26B/SLIT2/MMP14/FZD1/TNC/WNT1/SOX4/WNT2/CTHRC1/FOXD1/GLI2/SFRP2/NOG/FZD2/TACSTD2/FOLR1/SOX11/MSX2/DDR1/HAND2/EYA1/LHX1/VANGL2/SPINT2/HOXD11/OVOL2/SIX2/SEMA3E/NKX2-5/ALX1/BMP7/LAMA1/L…	72	6.83537
BP	GO:0006067	ethanol metabolic process	12/2423	21/18670	2.09724e-06	6.8218e-05	5.00233e-05	ADH1B/SULT1B1/ADH4/ADH7/ADH1C/ADH6/ALDH2/ADH1A/SULT2A1/ACSS1/SULT1C4/ALDH3B2	12	-1.73205
BP	GO:0031343	positive regulation of cell killing	24/2423	68/18670	2.20814e-06	7.14326e-05	5.23805e-05	SLAMF6/VAV1/IL12RB1/IL12A/CD1C/ULBP2/CLEC7A/ULBP3/SH2D1A/ITGAM/RASGRP1/PTPRC/PGLYRP3/CRTAM/IFNG/SYK/IL12B/STAP1/CD1E/ULBP1/CD1B/RAET1L/PGLYRP4/CD1A	24	4.89898
BP	GO:0051924	regulation of calcium ion transport	60/2423	254/18670	2.24633e-06	7.22732e-05	5.29969e-05	DRD1/CAMK2A/IL13/P2RX2/CACNG1/STRIT1/P2RX3/KCNE2/RGN/JPH1/JPH3/LILRB1/CAV3/P2RX1/CBARP/PIK3CG/CD84/HAP1/GRM6/CRACR2B/RCVRN/STC2/CORO1A/TGFB1/HOMER3/CACNA2D1/BEST1/CACNB3/P2RX5/CXCL9/FCRL3/TRPC3/ANK2/P2RY6/GRAMD2A/GEM/HPCA/GRIN1/P2RY12/PTGS2/SNCA/CACNB1/RRAD/CEMIP/G6PD/CACNA1B/JSRP1/SLN/CD19/RGS4/UBASH3B/STAC/DRD2/STAC2/CALCR/ADRA2A/TRDN/CRHR1/LPAR3/ATP2C2	60	5.42218
BP	GO:0032412	regulation of ion transmembrane transporter activity	61/2423	260/18670	2.35517e-06	7.53655e-05	5.52645e-05	ACTN2/LRRC52/RASGRF1/STRIT1/FXYD1/KCNE2/RGN/PPARGC1A/TREM2/JPH1/JPH3/LRRC26/CAV3/CBARP/HAP1/GRM5/GRIA4/NLGN3/KCNS2/CACNA2D1/CACNB3/ANK2/SCN2B/P2RY6/IFNG/PTAFR/GEM/HPCA/GRIN1/KCNE4/TESC/CACNB1/RRAD/FXYD2/KCNS1/GRIN2A/DLG3/JSRP1/SLN/SCN3B/LRRC38/ANK3/GAL/MTNR1B/STAC/SHISA9/MMP9/DRD2/STAC2/GRIA2/ADRA2A/WNK2/TRDN/ANO9/ANXA3/FXYD3/NLGN1/CRHR1/HTR3A/CFTR/NEFL	61	5.76166
BP	GO:0050707	regulation of cytokine secretion	52/2423	210/18670	2.41983e-06	7.63164e-05	5.59617e-05	C1QTNF3/CIDEA/SAA1/HTR2B/CARD17/LGALS9/PANX3/FFAR4/FGR/PYDC1/LILRB1/FFAR2/CD2/GATA3/TRIM6/CLEC4E/TNFRSF21/CCL19/CHIA/IL10/RASGRP1/MMP8/PTGER4/CRTAM/HAVCR2/IFNG/CCR7/SYK/IL1A/OSM/CCN4/TWIST1/PTPN22/NLRP7/SSC5D/HDAC9/TNF/TLR8/IL1B/CRLF2/ALOX15B/CLEC5A/DRD2/AIM2/POSTN/CLEC6A/BANK1/PAEP/TLR10/NLRP2/MMP12/VTCN1	52	6.1017
BP	GO:0097529	myeloid leukocyte migration	52/2423	210/18670	2.41983e-06	7.63164e-05	5.59617e-05	VEGFD/TAFA4/SAA1/CCL16/TREM2/S100A9/VAV1/CCL11/NCKAP1L/ADAM8/NBL1/GREM1/PIK3CG/PTPRO/PIK3CD/ITGB2/CCL19/CXCL9/RAC2/IL6/FPR2/MMP28/PTGER4/EMILIN1/CCR7/SLAMF8/S100A14/SYK/ROR2/P2RY12/ADGRE2/TNFRSF11A/CXCL3/STAP1/CCL22/CSF3R/CXCL8/TGFB2/CCL26/CYP19A1/SLIT2/IL1B/MMP14/MCOLN2/CCL7/PF4V1/CD177/CXCL1/SCG2/CXCL6/CHGA/CXCL5	52	6.1017
BP	GO:0032409	regulation of transporter activity	65/2423	283/18670	2.42356e-06	7.63164e-05	5.59617e-05	ACTN2/LRRC52/RASGRF1/STRIT1/FXYD1/KCNE2/RGN/PPARGC1A/PON1/TREM2/JPH1/JPH3/LRRC26/CAV3/CBARP/HAP1/GRM5/GRIA4/NLGN3/KCNS2/CACNA2D1/CACNB3/ANK2/SCN2B/P2RY6/IFNG/PTAFR/GEM/HPCA/GRIN1/KCNE4/TWIST1/SNCA/TESC/CACNB1/RRAD/FXYD2/KCNS1/GRIN2A/DLG3/JSRP1/SLN/SCN3B/LRRC38/ANK3/GAL/MTNR1B/STAC/SHISA9/MMP9/SYNGR3/DRD2/STAC2/GRIA2/ADRA2A/WNK2/TRDN/ANO9/ANXA3/FXYD3/NLGN1/CRHR1/HTR3A/CFTR/NEFL	65	5.82963
BP	GO:0046879	hormone secretion	70/2423	312/18670	2.47132e-06	7.74086e-05	5.67626e-05	C1QTNF3/GCK/ADCY8/REN/GLUL/TBX3/RASL10B/SYT9/GPLD1/KCNB1/ADIPOQ/NIBAN2/PDX1/FFAR4/HNF1B/C1QTNF1/FFAR2/GATA3/MYB/MC4R/IL6/ADCY5/SFRP1/ADORA1/ILDR1/FAM3D/IFNG/SLC44A4/OSM/CD38/GPR119/RETN/SLC2A1/PTPRN/FOXL2/NKX6-1/SPP1/UCN3/TNF/CYP19A1/IL1B/INHA/SOX4/FGFR1/GAL/STXBP5L/TFAP2B/MTNR1B/LEP/SNAP25/GPR27/FOXD1/SOX11/FGF23/DRD2/ISL1/PCLO/IL11/LIF/ADRA2A/HTR2C/ITPR3/TAC1/CRHR1/GIPR/EPHA5/CHGA/SLC30A8/CFTR/…	70	5.7371
BP	GO:1902105	regulation of leukocyte differentiation	63/2423	272/18670	2.56172e-06	7.98179e-05	5.85294e-05	ADIPOQ/RAG1/APCS/TREM2/LGALS9/CD86/ZAP70/NFAM1/NCKAP1L/ADAM8/LILRB1/IL12RB1/EVI2B/IL12A/CD2/SASH3/RASSF2/GATA3/TNFSF9/IKZF3/TGFB1/CCL19/HLA-DOA/IL2/MYB/TESPA1/TNFRSF18/FCRL3/JAK3/CR1/RASGRP1/SFRP1/PTPRC/PGLYRP3/IL18/CTLA4/IL7R/IFNG/SLAMF8/GLI3/SYK/LILRB4/ROR2/GPR55/IL12B/MITF/TESC/CD27/IL2RA/TNF/CD80/CARD11/CYP26B1/MMP14/INHA/UBASH3B/GLI2/LIF/FOXN1/IRF4/PGLYRP4/CLDN18/FOXJ1	63	7.18132
BP	GO:0050769	positive regulation of neurogenesis	97/2423	474/18670	2.66691e-06	8.26604e-05	6.06137e-05	SH3GL3/ASCL1/PCP4/MME/CUX2/CPEB3/TREM2/PTK7/LTK/S100A9/LTA/PLXNA3/NBL1/ECT2/HAP1/LIMK1/ISLR2/NEUROG3/IQGAP1/TGFB1/SMARCD3/IL2/MYB/BDNF/FGF20/CHODL/SYT3/IL6/CNTN1/TENM3/NTRK3/DPYSL3/OLIG2/SEMA4D/NEGR1/IFNG/PTPRZ1/ANKRD1/GLI3/FLNA/FOXO6/P2RY12/SERPINE2/PLPPR5/ZNF804A/NKX6-1/BMP5/DKK1/TNF/TIMP2/EPHA3/SLIT2/IL1B/DBN1/ATOH1/FZD1/GPC2/RASSF10/HGF/FGFR1/RGS2/ZNF488/CRABP2/SYT4/BEND6/SEMA6A/RASAL1/L1CAM/…	97	8.63044
BP	GO:0001505	regulation of neurotransmitter levels	77/2423	354/18670	2.77075e-06	8.54314e-05	6.26456e-05	DRD1/SLC6A2/SLC1A2/CAMK2A/GLUL/GLYAT/SYT9/ADRA1A/DMGDH/BAAT/CHRNA4/RGN/BHMT/CPS1/POR/GDNF/UPB1/SNCG/STX3/KCNMB4/SLC18A1/P2RX1/APBA2/ITGB2/PRKCB/CLEC7A/OTOF/PTX3/SLC38A1/IL10/RIMS4/PFN2/MMP8/IFNG/SLC44A4/ADORA2B/SNCAIP/CHRNA5/PTGS2/SV2A/SLC6A3/SLC6A5/SNCA/P2RY4/CHRNA6/TPH1/CACNA1B/SNPH/UNC13C/CTBP2/TNF/GRIN2A/KCNJ10/IL1B/GAD1/PRKCG/DOC2A/GRM4/RGS2/PTGIS/STXBP5L/GABRA2/RGS4/SYT4/MOXD1/SNAP25/SYNGR3…	77	4.9003
BP	GO:0050730	regulation of peptidyl-tyrosine phosphorylation	60/2423	256/18670	2.94073e-06	9.02026e-05	6.61443e-05	IL13/ADRA1A/ADIPOQ/IGF1/HPX/EPGN/TREM2/GREM1/IL12A/EPHA7/GRM5/IQGAP1/NCK2/CD3E/ITGB2/TGFB1/IL2/BDNF/AREG/TNFRSF18/IL6/FGF7/CNTN1/SFRP1/SAMSN1/ADORA1/CD24/PTPRC/SEMA4D/IL18/LRRK1/IFNG/SYK/IL12B/OSM/FCGR1A/STAP1/NCF1/TNF/FGF10/CD80/DLG3/HGF/GPRC5A/ERBB4/LEP/SFRP2/ALKAL2/TGFA/ISL1/LRP8/IL11/LIF/NTRK2/ADRA2A/IL22RA2/BANK1/ALKAL1/EREG/EFNA5	60	6.45497
BP	GO:0001823	mesonephros development	31/2423	102/18670	3.15975e-06	9.64213e-05	7.07044e-05	REN/GDNF/HNF1B/GATA3/ADAMTS16/HOXB7/TGFB1/FOXC2/SFRP1/FGF1/GLI3/CALB1/HOXA11/FMN1/FGF10/KIF26B/SLIT2/BASP1/WNT1/FGFR1/FOXD1/NOG/TACSTD2/CER1/EPCAM/EYA1/LHX1/HOXD11/SIX2/BMP7/FOXJ1	31	4.84934
BP	GO:0098659	inorganic cation import across plasma membrane	27/2423	83/18670	3.21181e-06	9.70099e-05	7.1136e-05	SLC12A1/SLC9C2/KCNJ8/KCNE2/ABCC9/TRPM2/SLC9A5/CACNA2D1/FAM155A/SLC9A3/IFNG/KCNK9/FXYD2/FAM155B/KCNJ10/KCNH2/SLC9A4/ATP1A4/TRPV5/KCNJ13/ATP1A3/CALCR/SLC9C1/ATP12A/TRPV6/HCN4/KCNJ16	27	3.27165
BP	GO:0099587	inorganic ion import across plasma membrane	27/2423	83/18670	3.21181e-06	9.70099e-05	7.1136e-05	SLC12A1/SLC9C2/KCNJ8/KCNE2/ABCC9/TRPM2/SLC9A5/CACNA2D1/FAM155A/SLC9A3/IFNG/KCNK9/FXYD2/FAM155B/KCNJ10/KCNH2/SLC9A4/ATP1A4/TRPV5/KCNJ13/ATP1A3/CALCR/SLC9C1/ATP12A/TRPV6/HCN4/KCNJ16	27	3.27165
BP	GO:0070098	chemokine-mediated signaling pathway	28/2423	88/18670	3.46905e-06	0.000104158	7.63776e-05	ACKR2/CCL16/TREM2/CCR6/SLIT3/CXCR6/CCL11/CXCR3/CCL19/CCR4/PADI2/XCR1/CXCL9/CCR5/CCR7/CXCL3/CCL22/CXCL8/CCL26/SLIT2/CXCR5/CCR8/CCL7/PF4V1/CXCL1/CXCL6/TFF2/CXCL5	28	4.53557
BP	GO:0015698	inorganic anion transport	44/2423	169/18670	3.48366e-06	0.000104158	7.63776e-05	AQP6/SLC12A1/TG/SLC22A11/FXYD1/SLC4A1/CLCN1/LRRC8B/SLC4A8/SLC34A3/GRM5/CLCA4/BEST1/GABRG1/P2RY6/PTAFR/P2RY4/CLCNKB/CLDN4/BEST3/ANO4/CLIC6/SFRP4/GABRA4/FGFR1/GABRA2/SLC5A5/GABRR1/GABRP/SLC13A1/FGF23/CLIC3/LRRC18/SLC4A11/ANO9/FXYD3/CLCA1/TTYH1/SLC26A9/PRKG2/SLC4A3/CFTR/GABRA5/SLC34A2	44	4.52267
BP	GO:0043270	positive regulation of ion transport	63/2423	275/18670	3.76356e-06	0.000111961	8.20996e-05	ACTN2/LRRC52/DRD1/ACE2/CAMK2A/IL13/P2RX2/STRIT1/ABCB4/FXYD1/P2RX3/KCNE2/RGN/CYP4A11/GDNF/TREM2/LRRC26/P2RX1/HAP1/GRM6/NLGN3/CACNA2D1/CACNB3/P2RX5/CXCL9/TRPC3/CNTN1/ANK2/ADORA1/P2RY6/IFNG/PTAFR/FLNA/GRIN1/P2RY12/SNCA/TNFRSF11A/TESC/CEMIP/G6PD/IL1B/KCNH2/PLA2R1/CD19/SCN3B/LRRC38/ANK3/GAL/SYT4/LEP/STAC/DRD2/STAC2/CALCR/ADRA2A/ATP8A2/WNK2/TRDN/NKX2-5/LPAR3/HTR3A/CFTR/ATP2C2	63	4.15761
BP	GO:0046631	alpha-beta T cell activation	38/2423	138/18670	3.79304e-06	0.000112274	8.23288e-05	CDH26/LGALS9/SLAMF6/CD86/ZAP70/NCKAP1L/LILRB1/PRKCQ/IL12RB1/IL12A/SASH3/GATA3/LY9/ITK/SPN/CD3E/GPR18/CCL19/IL2/MYB/DOCK2/GPR183/IL6/JAK3/PTPRC/PTGER4/IL18/IFNG/GLI3/SYK/IL12B/BCL11B/SEMA4A/CD80/FUT7/ELF4/IRF4/PLA2G2D	38	6.16441
BP	GO:0016266	O-glycan processing	22/2423	61/18670	3.84728e-06	0.000113313	8.30909e-05	MUCL1/GALNT13/GALNT6/MUC15/MUC12/B3GNT8/MUC21/GALNT7/B3GNT7/MUC20/B3GNT3/GCNT1/MUC5B/GALNT3/GCNT3/A4GNT/MUC1/MUC2/MUC5AC/GALNT5/CHST4/MUC6	22	4.69042
BP	GO:0002705	positive regulation of leukocyte mediated immunity	37/2423	133/18670	3.89703e-06	0.00011421	8.37486e-05	IL13/HPX/SLAMF6/VAV1/LTA/FGR/IL12RB1/IL12A/CD1C/SASH3/GATA3/ULBP2/ITGB2/TGFB1/IL2/ULBP3/SH2D1A/IL6/ITGAM/RASGRP1/PTPRC/IL18/CRTAM/PTAFR/KIR2DL4/ADORA2B/SYK/IL12B/CD1E/TNF/IL1B/ULBP1/CD177/CD1B/RAET1L/CD1A/CRHR1	37	5.42517
BP	GO:0032609	interferon-gamma production	33/2423	113/18670	4.07515e-06	0.000118842	8.71451e-05	RIPK3/LGALS9/SLAMF6/LTA/LILRB1/IL12RB1/IL12A/CD2/SASH3/GATA3/ITK/SPN/CD3E/CLEC7A/IL2/IL10/RASGRP1/TLR7/PGLYRP3/IL18/HAVCR2/CCR7/IL12B/PTPN22/TNFRSF13C/TNF/TLR8/IL1B/INHA/SCGB1A1/ISL1/PGLYRP4/VTCN1	33	5.74456
BP	GO:0002706	regulation of lymphocyte mediated immunity	40/2423	149/18670	4.24083e-06	0.000123067	9.02435e-05	C4BPA/HPX/C4BPB/RIPK3/LGALS9/SLAMF6/VAV1/LTA/LILRB1/IL12RB1/IL12A/CD1C/SASH3/GATA3/ULBP2/TGFB1/IL2/ULBP3/SH2D1A/IL10/IL6/CR1/RASGRP1/PTPRC/IL18/CRTAM/IL7R/HAVCR2/KIR2DL4/IL12B/CD1E/TNF/IL1B/ULBP1/LEP/CD1B/RAET1L/CD1A/SERPINB4/FOXJ1	40	5.37587
BP	GO:0001755	neural crest cell migration	21/2423	57/18670	4.29684e-06	0.000124084	9.09894e-05	HTR2B/GDNF/FGF19/TBX1/SEMA6D/SEMA3D/SEMA4D/SEMA4A/TWIST1/ERBB4/SEMA6A/FOLR1/ISL1/HAND2/SEMA3A/OVOL2/SEMA3E/ALX1/SEMA3C/BMP7/PITX2	21	3.7097
BP	GO:0030278	regulation of ossification	50/2423	203/18670	4.40609e-06	0.000126622	9.28499e-05	RANBP3L/IGF1/JAG1/TGFB3/EGR2/GREM1/MGP/HOXA2/RASSF2/GDF10/TGFB1/RUNX2/AREG/IL6/SFRP1/PTGER4/SEMA4D/OMD/IGFBP5/GLI3/KREMEN2/CCN4/TWIST1/SOST/TPH1/DKK1/TNF/TGFB2/GLI1/HGF/WNT10B/TFAP2A/RORB/CTHRC1/SFRP2/TMEM119/NOG/RFLNA/SOX11/FGF23/MSX2/FBN2/HAND2/BMPR1B/COMP/SIX2/TAC1/BMP7/NELL1/WNT7B	50	6.50538
BP	GO:0042635	positive regulation of hair cycle	9/2423	13/18670	4.49765e-06	0.000128629	9.43215e-05	TERT/HPSE/TNF/TGFB2/WNT10B/GAL/KRT17/MSX2/FOXN1	9	2.33333
BP	GO:0010975	regulation of neuron projection development	100/2423	499/18670	4.88566e-06	0.000139053	0.000101966	CTNNA2/UST/MT3/CUX2/TNR/CPEB3/PTK7/PMP22/LTK/S100A9/TBR1/PLXNA3/MINAR1/EPHA7/GATA3/LIMK1/ISLR2/CSMD3/NEUROG3/SEMA6D/NLGN3/PTPRO/RAP1GAP2/POU3F2/IQGAP1/TLX2/CRMP1/SEMA3D/IL2/BDNF/TRIM46/CHODL/SYT3/CNTN1/TENM3/SFRP1/KEL/LRRC4C/NTRK3/DPYSL3/SEMA4D/NEGR1/ANKRD1/INPP5J/FOXO6/GRIN1/CD38/SEMA4A/PLPPR5/ZNF804A/BCL11A/NKX6-1/SPP1/BMP5/DKK1/EPHA3/SLIT2/DBN1/FZD1/GPC2/MARK1/HGF/PRRX1/FGFR1/KLK6/RGS2/OLFM1/C…	100	8.8
BP	GO:0019233	sensory perception of pain	31/2423	104/18670	4.9523e-06	0.000140276	0.000102862	SMR3A/SMR3B/OPRPN/MME/TMEM100/TAFA4/P2RX3/CHRNA4/RETREG1/CNR2/GRM1/FABP5/CACNB3/LXN/IL10/ADORA1/PROK2/PTAFR/PENK/GRIN1/HOXB8/IL12B/PTGS2/GRIN2A/SCN3B/HOXD1/KCND2/TAC1/ALOXE3/TRPA1/UCHL1	31	2.33487
BP	GO:0048754	branching morphogenesis of an epithelial tube	40/2423	150/18670	5.06744e-06	0.000142853	0.000104752	RSPO2/ESR1/TBX3/AR/GDNF/CCL11/HNF1B/CAV3/ADAMTS16/HOXB7/TGFB1/TBX20/FOXC2/AREG/FGF1/GLI3/HOXA11/HHIP/TNF/FGF10/SLIT2/MMP14/TNC/WNT1/WNT2/FOXD1/GLI2/SFRP2/NOG/TACSTD2/MSX2/DDR1/EYA1/LHX1/VANGL2/HOXD11/SIX2/SEMA3E/BMP7/LAMA1	40	4.74342
BP	GO:0042063	gliogenesis	65/2423	290/18670	5.76294e-06	0.00016169	0.000118565	DRD1/ASCL1/MT3/LEPR/TERT/TREM2/LTA/ADAM22/ROR1/TSPAN2/EGR2/SOX2/LAMB1/NLGN3/POU3F2/TNFRSF21/ADGRG1/PLP1/TGFB1/MYB/AREG/GPR183/IL6/MXRA8/FPR2/NTRK3/OLIG2/PITX3/ID4/CNTNAP1/IFNG/PTPRZ1/GLI3/PENK/ROR2/P2RY12/PRDM8/SERPINE2/STAP1/NKX6-1/S100B/TNF/TGFB2/FGF10/GSTP1/KCNJ10/IL1B/MMP14/SOX4/BACE2/ZNF488/NOG/SOX11/TENM4/ZNF365/GAP43/LPAR1/LIF/NTRK2/LIN28A/FGF5/CDK5R2/SPINT1/DNER/FA2H	65	6.82191
BP	GO:0007187	G protein-coupled receptor signaling pathway, coupled to cyclic nucleotide second messenger	59/2423	256/18670	6.19661e-06	0.000173037	0.000126886	DRD1/ADCY8/DRD5/GALR3/ADRA1A/LGR5/GCGR/HTR2B/SSTR1/GNA15/HTR7/CNR2/GRM6/PTGFR/ADGRG1/ADCY2/ADGRE5/XCR1/CXCL9/MC4R/ADCY5/FPR1/FPR2/ADORA1/PTGER4/ADGRE1/GPR161/MARCO/ADORA2B/FLNA/P2RY12/ADGRE3/ADGRE2/GRM3/ADGRB1/UCN3/INSL3/HRH2/GLP2R/GRM4/APLP1/ADGRB2/RGS2/RGS1/MTNR1B/ADGRB3/GABBR1/PTHLH/DRD2/GPR78/LPAR1/PSAPL1/CALCR/ADRA2A/HTR2C/SSTR3/CRHR1/LPAR3/CHGA	59	5.33775
BP	GO:0110110	positive regulation of animal organ morphogenesis	26/2423	81/18670	6.39876e-06	0.000177843	0.00013041	AR/GDNF/JAG1/ODAPH/GATA3/HOXB7/TGFB1/FGF7/FGF1/HOXA11/TWIST1/DKK1/TGFB2/FGF10/BASP1/TFAP2A/FGFR1/HOXC11/WNT2/NOG/AMTN/HAND2/LIF/LHX1/SEMA3C/BMP7	26	4.31455
BP	GO:0032649	regulation of interferon-gamma production	30/2423	101/18670	7.56408e-06	0.000208276	0.000152726	RIPK3/LGALS9/SLAMF6/LTA/LILRB1/IL12RB1/IL12A/CD2/SASH3/GATA3/CD3E/CLEC7A/IL2/IL10/RASGRP1/TLR7/PGLYRP3/IL18/HAVCR2/CCR7/IL12B/PTPN22/TNFRSF13C/TNF/TLR8/IL1B/INHA/SCGB1A1/ISL1/PGLYRP4	30	5.47723
BP	GO:0046632	alpha-beta T cell differentiation	30/2423	101/18670	7.56408e-06	0.000208276	0.000152726	LGALS9/SLAMF6/CD86/ZAP70/NCKAP1L/IL12RB1/SASH3/GATA3/LY9/ITK/SPN/GPR18/CCL19/IL2/MYB/GPR183/IL6/JAK3/PTGER4/IL18/IFNG/GLI3/SYK/IL12B/BCL11B/SEMA4A/CD80/FUT7/IRF4/PLA2G2D	30	5.47723
BP	GO:0050919	negative chemotaxis	18/2423	46/18670	7.73368e-06	0.00021196	0.000155427	SLIT3/PLXNA3/LRTM2/SLIT1/EPHA7/SEMA6D/SEMA3D/UNC5C/SEMA4D/SEMA4A/SLIT2/SEMA6A/FLRT2/SEMA3A/NRG3/SEMA3E/SEMA3C/EFNA5	18	4.24264
BP	GO:0043368	positive T cell selection	15/2423	34/18670	7.78844e-06	0.000212477	0.000155807	SLAMF6/ZAP70/IL12RB1/LY9/SPN/CD3E/DOCK2/THEMIS/IL6/PTPRC/IL12B/BCL11B/CD3G/FOXN1/IRF4	15	3.87298
BP	GO:0010518	positive regulation of phospholipase activity	21/2423	59/18670	8.06997e-06	0.000219148	0.000160698	ESR1/SELE/ADRA1A/HTR2B/ANG/GNA15/ITK/AVPR1B/BDNF/NTRK3/P2RY6/PTAFR/HPCA/P2RY12/GPR55/PDGFRA/NTF4/FGFR1/LPAR2/LPAR1/NTRK2	21	2.4004
BP	GO:0042476	odontogenesis	36/2423	132/18670	8.54918e-06	0.000231101	0.000169463	AQP6/KLK4/RSPO2/ODAM/AMBN/TGFB3/TBX1/ODAPH/LAMB1/TNFRSF11B/AQP1/TGFB1/RUNX2/GLI3/BCL11B/TWIST1/PDGFRA/PHEX/CSF3R/TGFB2/FGF10/WNT10A/TNC/TFAP2A/COL1A2/COL1A1/FGF4/GLI2/ITGB4/MSX2/AMTN/HAND2/PAX9/LHX8/BMP7/PITX2	36	4.33333
BP	GO:0046394	carboxylic acid biosynthetic process	93/2423	462/18670	8.6028e-06	0.000231493	0.000169751	CYP3A4/CYP1A2/CYP1A1/GCK/ABHD1/CYP2E1/SLC27A5/CYP8B1/GADL1/GLUL/CTH/UST/AASS/TECRL/ABCB11/CYP2C9/CYP2C8/ACSM5/PDK4/ACADL/CYP39A1/ACSM2A/GLS2/AMACR/ACSM2B/MTHFD1/CYP7A1/PFKFB1/APOC3/APOA5/ALDOB/ADIPOQ/BAAT/SLC4A1/IGF1/RGN/APOC1/BHMT/PPARGC1A/ACSM6/GPT2/HAAO/CPS1/ADI1/UPB1/CDO1/ACSM3/HACD4/FGF19/ACSS1/DCN/PGM2L1/PTGS1/PLP1/TGFB1/FABP5/HK3/ASNS/ACOT11/PTGES/IFNG/SYK/PTGS2/RIMKLA/APOA4/BCAT1/ALOX5AP/…	93	-0.103695
BP	GO:0002923	regulation of humoral immune response mediated by circulating immunoglobulin	8/2423	11/18670	9.11676e-06	0.000244214	0.000179079	C4BPA/HPX/C4BPB/LTA/CR1/PTPRC/TNF/FOXJ1	8	0.707107
BP	GO:0001657	ureteric bud development	29/2423	97/18670	9.27118e-06	0.000247231	0.000181291	GDNF/HNF1B/GATA3/ADAMTS16/HOXB7/TGFB1/FOXC2/SFRP1/FGF1/GLI3/CALB1/HOXA11/FMN1/KIF26B/SLIT2/BASP1/WNT1/FGFR1/FOXD1/NOG/TACSTD2/CER1/EPCAM/EYA1/LHX1/HOXD11/SIX2/BMP7/FOXJ1	29	5.01377
BP	GO:0016053	organic acid biosynthetic process	93/2423	463/18670	9.42056e-06	0.000250088	0.000183386	CYP3A4/CYP1A2/CYP1A1/GCK/ABHD1/CYP2E1/SLC27A5/CYP8B1/GADL1/GLUL/CTH/UST/AASS/TECRL/ABCB11/CYP2C9/CYP2C8/ACSM5/PDK4/ACADL/CYP39A1/ACSM2A/GLS2/AMACR/ACSM2B/MTHFD1/CYP7A1/PFKFB1/APOC3/APOA5/ALDOB/ADIPOQ/BAAT/SLC4A1/IGF1/RGN/APOC1/BHMT/PPARGC1A/ACSM6/GPT2/HAAO/CPS1/ADI1/UPB1/CDO1/ACSM3/HACD4/FGF19/ACSS1/DCN/PGM2L1/PTGS1/PLP1/TGFB1/FABP5/HK3/ASNS/ACOT11/PTGES/IFNG/SYK/PTGS2/RIMKLA/APOA4/BCAT1/ALOX5AP/…	93	-0.103695
BP	GO:0019369	arachidonic acid metabolic process	19/2423	51/18670	1.01099e-05	0.000267191	0.000195928	CYP1A2/CYP1A1/CYP2A13/CYP2E1/CYP2B6/CYP2C9/CYP2A7/CYP2C8/CYP2A6/CYP4A11/PTGS1/PTGES/PTGS2/ALOX12B/PTGIS/PLA2G4A/ALOX15B/PTGDS/ALOXE3	19	-0.229416
BP	GO:0032740	positive regulation of interleukin-17 production	10/2423	17/18670	1.0841e-05	0.00028524	0.000209162	SLAMF6/PRKCQ/LY9/TGFB1/IL2/IL6/IL18/IL12B/OSM/SPHK1	10	3.16228
BP	GO:0002675	positive regulation of acute inflammatory response	14/2423	31/18670	1.12472e-05	0.000294618	0.000216039	KLKB1/ADAM8/FFAR2/PIK3CG/C2CD4A/IL6/CCR7/PTGS2/OSM/TNFRSF11A/TNF/IL1B/NPY5R/TAC1	14	3.20713
BP	GO:0003205	cardiac chamber development	43/2423	171/18670	1.15474e-05	0.000298631	0.000218982	TBX3/PTK7/SLIT3/JAG1/TBX5/MYL2/CAV3/TBX1/GATA3/MYH6/TGFB1/SMARCD3/TBX20/FOXC2/SALL4/ANK2/TNNI3/BMP5/TGFB2/MYH7/SLIT2/FZD1/SOX4/WNT2/SFRP2/NOG/FZD2/SOX11/MSX2/NPY5R/SHOX2/ISL1/HAND2/XIRP2/VANGL2/OVOL2/KCNK2/NKX2-5/STRA6/SEMA3C/BMP7/COL11A1/GRHL2	43	6.25244
BP	GO:0072163	mesonephric epithelium development	29/2423	98/18670	1.15518e-05	0.000298631	0.000218982	GDNF/HNF1B/GATA3/ADAMTS16/HOXB7/TGFB1/FOXC2/SFRP1/FGF1/GLI3/CALB1/HOXA11/FMN1/KIF26B/SLIT2/BASP1/WNT1/FGFR1/FOXD1/NOG/TACSTD2/CER1/EPCAM/EYA1/LHX1/HOXD11/SIX2/BMP7/FOXJ1	29	5.01377
BP	GO:0072164	mesonephric tubule development	29/2423	98/18670	1.15518e-05	0.000298631	0.000218982	GDNF/HNF1B/GATA3/ADAMTS16/HOXB7/TGFB1/FOXC2/SFRP1/FGF1/GLI3/CALB1/HOXA11/FMN1/KIF26B/SLIT2/BASP1/WNT1/FGFR1/FOXD1/NOG/TACSTD2/CER1/EPCAM/EYA1/LHX1/HOXD11/SIX2/BMP7/FOXJ1	29	5.01377
BP	GO:0018958	phenol-containing compound metabolic process	30/2423	103/18670	1.16329e-05	0.000299421	0.000219561	DRD1/CYP2E1/TG/SULT1B1/DAO/CGA/AKR1B1/GATA3/ITGB2/ITGAM/DUOX1/SNCAIP/SLC6A3/SNCA/OCA2/TPH1/TGFB2/GRIN2A/SNCB/SLC5A5/MOXD1/CDH3/DRD2/INSM1/HAND2/TACR3/FOXE1/DUOXA1/DUOXA2/DUOX2	30	3.28634
BP	GO:0043367	CD4-positive, alpha-beta T cell differentiation	24/2423	74/18670	1.17819e-05	0.000301942	0.00022141	LGALS9/SLAMF6/CD86/NCKAP1L/IL12RB1/SASH3/GATA3/LY9/SPN/CCL19/IL2/MYB/GPR183/IL6/JAK3/PTGER4/IL18/IFNG/IL12B/SEMA4A/CD80/FUT7/IRF4/PLA2G2D	24	4.89898
BP	GO:0046683	response to organophosphorus	36/2423	134/18670	1.23172e-05	0.000314302	0.000230473	ALDH3A1/AQP8/AQP9/REN/P2RX2/PFKFB1/ADIPOQ/P2RX3/CPS1/CDO1/P2RX1/AANAT/PIK3CG/AQP1/P2RX5/AREG/TRPC3/P2RY6/IGFBP5/DUOX1/PTAFR/PENK/P2RY12/PTGS2/SLC6A3/P2RY4/PTPRN/HCN1/IL1B/WNT10B/SLC5A5/COL1A1/LPAR1/HCN4/CFTR/DUOX2	36	2.66667
BP	GO:0090183	regulation of kidney development	20/2423	56/18670	1.24412e-05	0.000316104	0.000231794	ADIPOQ/GDNF/HNF1B/GATA3/PRKX/HOXB7/TGFB1/CD24/BASP1/FOXD1/NOG/TACSTD2/MMP9/LIF/LHX1/LIN28A/SIX2/BMP7/SERPINB7/PROM1	20	3.57771
BP	GO:0048663	neuron fate commitment	22/2423	65/18670	1.25582e-05	0.000317711	0.000232973	ASCL1/LHX3/TBR1/POU3F2/FEV/NTRK3/OLIG2/GLI3/BCL11B/NKX6-1/ATOH1/PTF1A/ISL2/WNT1/PRRX1/GLI2/MNX1/ISL1/HOXC10/EYA1/LBX1/ESRP1	22	3.83761
BP	GO:1903522	regulation of blood circulation	65/2423	297/18670	1.30585e-05	0.000328963	0.000241224	ACE2/CTNNA3/CACNG1/ADRA1A/FXYD1/KCNE2/ABCC9/ASIC2/PDE5A/KCNMB4/MYL2/CAV3/P2RX1/PIK3CG/MYH6/ATP2A3/DSG2/CACNA2D1/AVPR1B/IL2/DES/CACNB3/ANK2/ADORA1/SCN2B/PTAFR/OXTR/FLNA/KCNE4/CELF2/PTGS2/CD38/KCNIP1/APELA/RYR1/CACNB1/FXYD2/TNNI3/CACNA1B/KCNK15/TGFB2/MYH7/HSPB7/KCNH2/HRH2/SCN3B/CACNA1G/RGS2/ATP1A4/RGS4/LEP/DRD2/SEMA3A/ATP1A3/CACNG6/TACR3/ADRA2A/TRDN/KCND2/FXYD3/ITPR3/NKX2-5/TAC1/CHGA/HCN4	65	6.32577
BP	GO:0033077	T cell differentiation in thymus	23/2423	70/18670	1.40032e-05	0.000351267	0.000257579	RAG1/RIPK3/CCR6/ZAP70/ADAM8/GATA3/CD3E/DOCK2/TESPA1/RASGRP1/PTPRC/IL7R/CCR7/GLI3/BCL11B/CD3G/CARD11/WNT1/AIRE/FZD7/GLI2/FOXN1/FOXJ1	23	4.3788
BP	GO:0048863	stem cell differentiation	58/2423	257/18670	1.44533e-05	0.000359786	0.000263826	ASCL1/ESR1/DNMT3L/HTR2B/GDNF/FGF19/PDX1/JAG1/HNF1B/TBX5/GREM1/TEAD2/TBX1/GSC/LMO1/GATA3/TRIM6/SEMA6D/SEMA3D/RUNX2/MYB/FOXC2/SFRP1/PTPRC/SEMA4D/MEOX1/OSM/SEMA4A/TWIST1/SOX21/PRICKLE1/PDGFRA/TGFB2/FZD1/WNT10A/NTF4/ERBB4/SEMA6A/TACSTD2/FOLR1/SOX11/MSX2/ISL1/HAND2/EPCAM/LIF/SEMA3A/LIN28A/PSMA8/OVOL2/SEMA3E/NKX2-5/ALX1/SEMA3C/BMP7/PITX2/HMGA2/SIX3	58	6.30271
BP	GO:1901568	fatty acid derivative metabolic process	42/2423	167/18670	1.44644e-05	0.000359786	0.000263826	CYP1A2/CYP1A1/CYP2A13/CYP2E1/SLC27A5/CYP2B6/CYP2C9/CYP2A7/CYP2C8/CYP2A6/ACSM2A/ACSL6/ACSL5/CES2/CYP4A11/PON1/ACSS3/GCDH/PTGS1/FAR1/FABP5/PTGES/ATP6V1B1/SYK/PTGS2/ABCC1/ALOX5AP/ALOX12B/IL1B/DPEP1/PTGIS/HACD1/PLA2G4A/ALOX15B/ELOVL7/PTGDS/ALOX5/ELOVL4/PLA2G4F/SCD5/ALOXE3/GGT6	42	0.92582
BP	GO:2001257	regulation of cation channel activity	44/2423	178/18670	1.46162e-05	0.000362041	0.00026548	ACTN2/LRRC52/RASGRF1/KCNE2/PPARGC1A/TREM2/JPH1/JPH3/LRRC26/CBARP/HAP1/GRIA4/NLGN3/KCNS2/CACNA2D1/CACNB3/ANK2/P2RY6/IFNG/GEM/HPCA/GRIN1/KCNE4/CACNB1/RRAD/KCNS1/GRIN2A/DLG3/JSRP1/LRRC38/ANK3/GAL/MTNR1B/STAC/SHISA9/MMP9/DRD2/STAC2/GRIA2/TRDN/ANXA3/NLGN1/CRHR1/NEFL	44	5.12569
BP	GO:0150076	neuroinflammatory response	24/2423	75/18670	1.52126e-05	0.000375245	0.000275162	ADCY8/IL13/IGF1/TREM2/ITGB2/MMP3/IL6/ITGAM/TLR7/FPR2/PTPRC/MMP8/IL18/IFNG/TAFA3/PTGS2/SNCA/STAP1/TNF/TLR8/IL1B/SPHK1/BACE2/MMP9	24	3.67423
BP	GO:0002063	chondrocyte development	18/2423	48/18670	1.5505e-05	0.000379295	0.000278131	COL7A1/COL14A1/COL12A1/VWA2/RUNX2/COL6A2/CHST11/COL6A3/ACAN/SFRP2/SULF1/RFLNA/PTHLH/MSX2/SHOX2/BMPR1B/COMP/COL11A1	18	3.77124
BP	GO:0030850	prostate gland development	18/2423	48/18670	1.5505e-05	0.000379295	0.000278131	ESR1/AR/CRIP1/SFRP1/ID4/SERPINB5/GLI3/GLI1/FGF10/CYP19A1/TNC/GLI2/ALOX15B/NOG/SULF1/PSAPL1/BMP7/HOXB13	18	3.29983
BP	GO:0006805	xenobiotic metabolic process	34/2423	125/18670	1.59865e-05	0.000387281	0.000283987	CYP3A4/CYP1A2/CYP1A1/GSTM1/ALDH3A1/CYP2A13/CYP2E1/UGT1A3/CYP2B6/GLYAT/SULT1B1/CYP2C9/CYP2A7/CYP2C8/CYP2A6/UGT1A4/ACSM2B/FMO3/CES2/BAAT/NAT2/POR/CDO1/NR1I2/CES3/PTGS1/UGT1A8/UGT1A5/GRIN1/GSTP1/CYP26B1/DPEP1/ARNT2/UGT1A10	34	-2.74398
BP	GO:0008045	motor neuron axon guidance	13/2423	28/18670	1.60277e-05	0.000387281	0.000283987	LHX3/PLXNA3/EGR2/KIF5C/HOXA2/SLIT1/RAC2/NTNG2/SLIT2/NTNG1/NOG/SEMA3A/LHX1	13	3.05085
BP	GO:0060512	prostate gland morphogenesis	13/2423	28/18670	1.60277e-05	0.000387281	0.000283987	ESR1/AR/CRIP1/SFRP1/ID4/SERPINB5/FGF10/TNC/GLI2/NOG/SULF1/BMP7/HOXB13	13	2.49615
BP	GO:0022612	gland morphogenesis	33/2423	120/18670	1.65337e-05	0.000397884	0.000291763	ESR1/TBX3/AR/CRIP1/CCL11/TGFB3/CAV3/TGFB1/AREG/FGF7/SFRP1/ID4/SERPINB5/IGFBP5/GLI3/TNF/TGFB2/GLI1/FGF10/TNC/HGF/FGFR1/GLI2/NOG/SULF1/MSX2/DDR1/SEMA3A/NRG3/SEMA3C/BMP7/LAMA1/HOXB13	33	4.7001
BP	GO:0019722	calcium-mediated signaling	51/2423	218/18670	1.66335e-05	0.00039864	0.000292317	CALML3/P2RX2/TMEM100/SELE/HTR2B/ACKR2/P2RX3/IGF1/RGN/TREM2/CCR6/JPH1/ZAP70/CXCR6/JPH3/TRPM2/HAP1/GRM5/CXCR3/PLEK/PTGFR/CD3E/HOMER3/CCR4/P2RX5/XCR1/CCR5/ANK2/FPR2/PTPRC/P2RY6/TRAT1/CCR7/HPCA/SYK/GRIN1/P2RY12/GPRC6A/KSR2/TNNI3/CXCL8/TNF/CD22/C10orf71/GRIN2A/CXCR5/JSRP1/ADGRB2/SPHK1/CCR8/TRDN	51	4.62092
BP	GO:0035850	epithelial cell differentiation involved in kidney development	17/2423	44/18670	1.68151e-05	0.00039864	0.000292317	ADIPOQ/GDNF/JAG1/GATA3/PTPRO/PRKX/IQGAP1/FOXC2/CD24/NPHS2/BASP1/MMP9/LIF/LHX1/SIX2/FOXJ1/PROM1	17	3.15296
BP	GO:0042269	regulation of natural killer cell mediated cytotoxicity	17/2423	44/18670	1.68151e-05	0.00039864	0.000292317	LGALS9/SLAMF6/VAV1/LILRB1/IL12A/ULBP2/ULBP3/SH2D1A/RASGRP1/CRTAM/HAVCR2/KIR2DL4/IL12B/ULBP1/LEP/RAET1L/SERPINB4	17	4.12311
BP	GO:0050806	positive regulation of synaptic transmission	42/2423	168/18670	1.69e-05	0.00039864	0.000292317	DRD1/ADCY8/GLUL/MME/SYT9/ADRA1A/CUX2/TNR/STX3/HAP1/NLGN3/CLSTN2/CACNB3/RIMS4/ADORA1/OXTR/CALB1/GRIN1/ROR2/PTGS2/IGSF9B/SERPINE2/RETN/SNCA/S100B/TNF/SLC24A2/MPP2/GRIN2A/RGS4/CALB2/SNAP25/DRD2/UNC13A/NTRK2/NRXN1/CHRNA7/NLGN1/IGSF11/ITPR3/TAC1/CRHR1	42	4.01189
BP	GO:0048771	tissue remodeling	44/2423	179/18670	1.69805e-05	0.00039864	0.000292317	PDK4/LEPR/PLG/JAG1/ADAM8/TGFB3/GREM1/TNFRSF11B/RASSF2/TGFB1/CELA1/IL2/FOXC2/RAC2/MC4R/IL6/SFRP1/IL18/IGFBP5/LRRK1/CTSK/GPNMB/SYK/IL1A/GPR55/IL12B/MITF/CD38/TNFRSF11A/TPH1/SPP1/FGF10/ABR/MMP14/MMP2/UBASH3B/LEP/CTHRC1/TMEM119/HAND2/LIF/SEMA3C/CLDN18/IL20RA	44	5.72872
BP	GO:0006023	aminoglycan biosynthetic process	32/2423	115/18670	1.70011e-05	0.00039864	0.000292317	UST/CSGALNACT1/DCN/OGN/TGFB1/HS3ST5/CHST1/XYLT1/B3GNT9/OMD/B3GNT8/PRELP/CHST6/CHST11/HS3ST1/CHST3/ACAN/GPC4/CEMIP/HS6ST2/B3GNT7/IL1B/HAS1/GPC2/FMOD/B3GNT3/LUM/HAS2/CHST5/VCAN/GALNT5/HS3ST6	32	5.3033
BP	GO:0045061	thymic T cell selection	11/2423	21/18670	1.73316e-05	0.00039864	0.000292317	ZAP70/GATA3/CD3E/DOCK2/PTPRC/CCR7/GLI3/CD3G/CARD11/AIRE/FOXN1	11	3.31662
BP	GO:0033559	unsaturated fatty acid metabolic process	31/2423	110/18670	1.73682e-05	0.00039864	0.000292317	CYP1A2/CYP1A1/CYP2A13/CYP2E1/CYP2B6/CYP2C9/CYP2A7/CYP2C8/CYP2A6/CES2/CYP4A11/PTGS1/FABP5/PTGES/ATP6V1B1/GLYATL2/PTGS2/ALOX5AP/ALOX12B/GSTP1/IL1B/PTGIS/PLA2G4A/ALOX15B/ELOVL7/PTGDS/ALOX5/ELOVL4/PLA2G4F/SCD5/ALOXE3	31	1.61645
BP	GO:0001656	metanephros development	27/2423	90/18670	1.73732e-05	0.00039864	0.000292317	ADIPOQ/GDNF/AKR1B1/HNF1B/GATA3/FOXC2/IRX2/GLI3/CALB1/HOXA11/PDGFRA/NPHS2/FMN1/FGF10/KIF26B/BASP1/HOXC11/TFAP2B/FOXD1/FRAS1/LIF/EYA1/LHX1/SIX2/BMP7/FOXJ1/WNT7B	27	4.42635
BP	GO:0014033	neural crest cell differentiation	27/2423	90/18670	1.73732e-05	0.00039864	0.000292317	HTR2B/GDNF/FGF19/JAG1/TBX1/GSC/SEMA6D/SEMA3D/FOXC2/SFRP1/SEMA4D/SEMA4A/TWIST1/WNT10A/ERBB4/SEMA6A/FOLR1/SOX11/ISL1/HAND2/SEMA3A/OVOL2/SEMA3E/ALX1/SEMA3C/BMP7/PITX2	27	4.42635
BP	GO:0015844	monoamine transport	27/2423	90/18670	1.73732e-05	0.00039864	0.000292317	DRD1/SLC6A2/SYT9/KCNB1/SLC22A1/CHRNA4/GDNF/SNCG/LILRB1/SLC18A1/P2RX1/FGF20/SYT3/OXTR/SYK/P2RY12/SLC6A3/SNCA/CHRNA6/SYT4/DRD2/ADRA2A/MAPK15/CRHR1/SYT8/CHGA/SYT13	27	2.50185
BP	GO:0046849	bone remodeling	27/2423	90/18670	1.73732e-05	0.00039864	0.000292317	PDK4/LEPR/ADAM8/TGFB3/GREM1/TNFRSF11B/RASSF2/TGFB1/RAC2/MC4R/IL6/SFRP1/LRRK1/CTSK/SYK/GPR55/MITF/CD38/TNFRSF11A/TPH1/SPP1/UBASH3B/LEP/CTHRC1/TMEM119/CLDN18/IL20RA	27	4.42635
BP	GO:0048489	synaptic vesicle transport	39/2423	152/18670	1.75933e-05	0.000400094	0.000293383	DRD1/CAMK2A/SYT9/ADRA1A/CHRNA4/SLC2A4/STX3/P2RX1/KIF5C/APBA2/PRKCB/OTOF/TRIM46/RIMS4/PFN2/ADORA2B/CHRNA5/SV2A/SNCA/DNM1/P2RY4/CHRNA6/SNPH/UNC13C/CTBP2/PRKCG/DOC2A/STXBP5L/SYT4/KIF5A/SNAP25/DRD2/AP3B2/UNC13A/PCLO/NLGN1/SYT8/CADPS/SNAP91	39	4.32346
BP	GO:0097480	establishment of synaptic vesicle localization	39/2423	152/18670	1.75933e-05	0.000400094	0.000293383	DRD1/CAMK2A/SYT9/ADRA1A/CHRNA4/SLC2A4/STX3/P2RX1/KIF5C/APBA2/PRKCB/OTOF/TRIM46/RIMS4/PFN2/ADORA2B/CHRNA5/SV2A/SNCA/DNM1/P2RY4/CHRNA6/SNPH/UNC13C/CTBP2/PRKCG/DOC2A/STXBP5L/SYT4/KIF5A/SNAP25/DRD2/AP3B2/UNC13A/PCLO/NLGN1/SYT8/CADPS/SNAP91	39	4.32346
BP	GO:0061326	renal tubule development	28/2423	95/18670	1.76393e-05	0.000400094	0.000293383	LGR5/GDNF/JAG1/HNF1B/GATA3/ADAMTS16/HOXB7/TGFB1/CD24/FGF1/IRX2/GLI3/CALB1/HOXA11/FMN1/KIF26B/WNT1/TFAP2B/FOXD1/NOG/TACSTD2/LIF/EYA1/LHX1/HOXD11/SIX2/PROM1/WNT7B	28	4.53557
BP	GO:0007200	phospholipase C-activating G protein-coupled receptor signaling pathway	29/2423	100/18670	1.77112e-05	0.000400193	0.000293456	ACTN2/GRPR/DRD1/ESR1/DRD5/ADRA1A/GNA15/GPR20/GRM5/BICD1/GPR18/GRM1/FPR1/FPR2/P2RY6/P2RY12/GPR55/GPR174/P2RY4/P2RY10/GPR27/DRD2/LPAR1/ADRA2A/HTR2C/CCKBR/CRHR1/LPAR3/CHGA	29	3.15682
BP	GO:0097479	synaptic vesicle localization	41/2423	163/18670	1.81206e-05	0.000407887	0.000299098	DRD1/CAMK2A/SYT9/ADRA1A/CHRNA4/SLC2A4/STX3/P2RX1/KIF5C/NLGN3/APBA2/PRKCB/OTOF/TRIM46/RIMS4/PFN2/ADORA2B/CHRNA5/SV2A/SNCA/DNM1/P2RY4/CHRNA6/SNPH/UNC13C/CTBP2/PRKCG/SYNDIG1/DOC2A/STXBP5L/SYT4/KIF5A/SNAP25/DRD2/AP3B2/UNC13A/PCLO/NLGN1/SYT8/CADPS/SNAP91	41	4.52904
BP	GO:0009952	anterior/posterior pattern specification	51/2423	219/18670	1.89921e-05	0.000425883	0.000312294	TBX3/NKD1/RIPPLY1/HES4/FOXB1/HNF1B/TBX1/HOXA2/CRB2/HOXB3/HOXB7/FOXC2/HOXB6/HOXC6/SFRP1/MEOX1/GLI3/HOXA11/HOXB8/ROR2/TIFAB/HOXC4/MLLT3/DKK1/HES7/BASP1/EN1/WNT1/HOXC11/HOXC13/RIPPLY2/WNT2/BHLHE41/GLI2/DMRT2/SFRP2/NOG/MSX2/CER1/HOXC5/HOXC10/DLL3/LHX1/VANGL2/CDX2/SIX2/ALX1/SEMA3C/TDRD5/HOXB9/SIX3	51	6.30126
BP	GO:0045667	regulation of osteoblast differentiation	34/2423	126/18670	1.91984e-05	0.000428885	0.000314495	RANBP3L/IGF1/JAG1/GREM1/HOXA2/RASSF2/GDF10/RUNX2/AREG/IL6/SFRP1/SEMA4D/IGFBP5/GLI3/CCN4/TWIST1/TNF/GLI1/HGF/WNT10B/RORB/CTHRC1/SFRP2/TMEM119/NOG/SOX11/FGF23/MSX2/FBN2/HAND2/BMPR1B/BMP7/NELL1/WNT7B	34	5.14496
BP	GO:0002260	lymphocyte homeostasis	21/2423	62/18670	1.94161e-05	0.000431242	0.000316224	RAG1/RIPK3/LGALS9/NCKAP1L/LMO1/DOCK10/CORO1A/TNFSF13B/TGFB1/SIT1/IL2/JAK3/GPR174/IL2RA/TNFRSF13C/TNFRSF13B/SPTA1/GAPT/FOXN1/PMAIP1/TNFRSF17	21	4.14614
BP	GO:0003012	muscle system process	92/2423	465/18670	1.94968e-05	0.000431242	0.000316224	ACTN2/DRD1/ACE2/MYH3/P2RX2/MLN/CTNNA3/KCNJ8/ADRA1A/STRIT1/HTR2B/FXYD1/P2RX3/CLCN1/KCNE2/IGF1/LMOD2/PPARGC1A/GDNF/PI16/ANKRD2/HTR7/PDE5A/NEB/MYL2/CAV3/P2RX1/PIK3CG/MYH2/CCDC78/MYH6/CRYAB/TNNI2/DSG2/CACNA2D1/DES/TBX20/GUCY1A1/TRPC3/ANK2/ADORA1/SCN2B/PROK2/SLC6A8/IGFBP5/PTAFR/OXTR/ADORA2B/FLNA/KCNE4/UTS2/TIFAB/PTGS2/CD38/MYOF/RYR1/TRIM72/TRIM63/G6PD/TNNI3/SCN7A/MYH7/IL1B/KCNH2/JSRP1/CHRNA1/SLN/SCN3B…	92	5.62989
BP	GO:0007492	endoderm development	24/2423	76/18670	1.95225e-05	0.000431242	0.000316224	COL7A1/COL8A1/COL12A1/HNF1B/SOX2/MIXL1/LAMB1/ITGA4/ITGB2/TGFB1/TBX20/MMP8/APELA/DKK1/COL5A1/MMP14/HOXC11/MMP2/NOG/MMP9/LHX1/PAX9/COL11A1/HMGA2	24	4.49073
BP	GO:0001704	formation of primary germ layer	33/2423	121/18670	1.99365e-05	0.00043875	0.000321729	COL7A1/COL8A1/COL12A1/HNF1B/CRB2/SOX2/MIXL1/LAMB1/ITGA4/TLX2/ITGB2/TBX20/FOXC2/MMP8/HOXA11/APELA/DKK1/COL5A1/MMP14/FGFR1/FZD7/MMP2/SFRP2/NOG/ITGB4/MMP9/EYA1/LHX1/ITGA3/SIX2/BMP7/COL11A1/HMGA2	33	5.39641
BP	GO:0071605	monocyte chemotactic protein-1 production	10/2423	18/18670	2.15474e-05	0.000465645	0.000341451	C1QTNF3/ADIPOQ/LGALS9/APOD/CLEC7A/SYK/TWIST1/GSTP1/IL1B/MCOLN2	10	1.89737
BP	GO:0071637	regulation of monocyte chemotactic protein-1 production	10/2423	18/18670	2.15474e-05	0.000465645	0.000341451	C1QTNF3/ADIPOQ/LGALS9/APOD/CLEC7A/SYK/TWIST1/GSTP1/IL1B/MCOLN2	10	1.89737
BP	GO:0072311	glomerular epithelial cell differentiation	10/2423	18/18670	2.15474e-05	0.000465645	0.000341451	ADIPOQ/JAG1/PTPRO/IQGAP1/FOXC2/CD24/NPHS2/BASP1/FOXJ1/PROM1	10	2.52982
BP	GO:0097094	craniofacial suture morphogenesis	10/2423	18/18670	2.15474e-05	0.000465645	0.000341451	TGFB3/TGFB1/GLI3/TIFAB/TWIST1/MMP14/FGF4/MMP16/MSX2/FREM1	10	3.16228
BP	GO:0048546	digestive tract morphogenesis	18/2423	49/18670	2.15518e-05	0.000465645	0.000341451	HNF1B/DACT1/SFRP1/GLI3/PDGFRA/GLI1/FGF10/GLI2/SFRP2/SOX11/SHOX2/VANGL2/EPHB3/OVOL2/SIX2/STRA6/SFRP5/AGR2	18	4.24264
BP	GO:0007631	feeding behavior	29/2423	101/18670	2.17983e-05	0.000469257	0.0003441	DRD1/ACE2/REN/GALR3/LEPR/BRS3/TBR1/PRLHR/MC4R/NEGR1/OXTR/GRIN1/RETN/PMCH/EN1/GAL/RXFP4/LEP/DRD2/NPY5R/HAND2/NTRK2/TACR3/ATP8A2/HTR2C/DMBX1/CRHR1/STRA6/UCHL1	29	3.52821
BP	GO:0050890	cognition	64/2423	296/18670	2.26106e-05	0.00048498	0.000355629	GRPR/DRD1/RASGRF1/ADCY8/MME/DRD5/GALR3/CUX2/CHRNA4/TNR/RAG1/CPEB3/FOXB1/JPH3/TBR1/CCL11/EGR2/GRM5/NLGN3/JAKMIP1/BDNF/ADORA1/HOXA1/KCNK10/PTPRZ1/OXTR/CALB1/FOXO6/TMPRSS11E/GRIN1/TIFAB/PTGS2/MGAT3/S100B/DKK1/TNF/SLC24A2/GRIN2A/PAK6/EN1/PRKCG/HRH2/NTF4/MUSK/MAP1A/TUSC3/SYT4/ADGRB3/SNAP25/DRD2/NTRK2/NRXN1/NPTX2/ITGA3/LHX8/CHRNA7/KCNK2/ITPR3/TAC1/CRHR1/STRA6/PPP1R1B/GABRA5/PAK5	64	5
BP	GO:0060193	positive regulation of lipase activity	23/2423	72/18670	2.34749e-05	0.000501701	0.00036789	ESR1/SELE/ADRA1A/APOA5/HTR2B/ANG/GNA15/ITK/AVPR1B/BDNF/NTRK3/P2RY6/PTAFR/HPCA/P2RY12/GPR55/PDGFRA/APOA4/NTF4/FGFR1/LPAR2/LPAR1/NTRK2	23	2.29366
BP	GO:0019935	cyclic-nucleotide-mediated signaling	50/2423	215/18670	2.3714e-05	0.000502639	0.000368578	DRD1/ADCY8/DRD5/PDE11A/ADRA1A/LGR5/GCGR/HTR2B/TCP11/PDE4A/PTGFR/ADGRG1/AQP1/ADCY2/ADGRE5/CXCL9/MC4R/ADCY5/PDE10A/PDZD3/PTGER4/ADGRE1/GPR161/CGAS/ADORA2B/ADGRE3/ADGRE2/NPPB/ADGRB1/UCN3/APLP1/ADGRB2/GAL/RGS2/MTNR1B/ADGRB3/RUNDC3A/PTHLH/DRD2/SCTR/GPR78/PCLO/LPAR1/CALCR/ADRA2A/HTR2C/CRHR1/GIPR/EPHA5/CHGA	50	4.52548
BP	GO:0035987	endodermal cell differentiation	17/2423	45/18670	2.37735e-05	0.000502639	0.000368578	COL7A1/COL8A1/COL12A1/HNF1B/SOX2/MIXL1/LAMB1/ITGA4/ITGB2/MMP8/DKK1/COL5A1/MMP14/MMP2/MMP9/COL11A1/HMGA2	17	3.63803
BP	GO:0048701	embryonic cranial skeleton morphogenesis	17/2423	45/18670	2.37735e-05	0.000502639	0.000368578	MTHFD1/TGFB3/TBX1/HOXA2/RUNX2/FOXC2/HOXA1/TWIST1/CHST11/PDGFRA/MMP14/TFAP2A/PRRX1/MMP16/LHX1/SIX2/GRHL2	17	3.63803
BP	GO:0006069	ethanol oxidation	8/2423	12/18670	2.42194e-05	0.00050664	0.000371512	ADH1B/ADH4/ADH7/ADH1C/ADH6/ALDH2/ADH1A/ACSS1	8	-2.12132
BP	GO:0043383	negative T cell selection	8/2423	12/18670	2.42194e-05	0.00050664	0.000371512	ZAP70/CD3E/DOCK2/THEMIS/PTPRC/CCR7/GLI3/AIRE	8	2.82843
BP	GO:0051798	positive regulation of hair follicle development	8/2423	12/18670	2.42194e-05	0.00050664	0.000371512	HPSE/TNF/TGFB2/WNT10B/GAL/KRT17/MSX2/FOXN1	8	2.82843
BP	GO:0051222	positive regulation of protein transport	84/2423	418/18670	2.4581e-05	0.000509579	0.000373667	C1QTNF3/GCK/ADCY8/GLUL/IL13/EXPH5/SAA1/GPLD1/KCNB1/HTR2B/ANG/IGF1/TREM2/LGALS9/PANX3/PDX1/FGR/PYDC1/ADAM8/TGFB3/FFAR2/ECT2/CD2/GATA3/TRIM6/CLEC4E/GTSE1/ITGB2/TGFB1/CCL19/IL2/CACNB3/CHIA/IL10/RAC2/IL6/ITGAM/RASGRP1/MMP8/ANXA13/PTGER4/CRTAM/HAVCR2/IFNG/KCNN4/ANKRD1/GLI3/HPCA/FLNA/SYK/IL1A/PTGS2/OSM/CD38/TWIST1/PTPN22/NLRP7/NKX6-1/CEMIP/UCN3/TNF/TGFB2/TLR8/IL1B/ANK3/SOX4/MTCL1/LEP/CRLF2/GPR27/ALOX15…	84	6.54654
BP	GO:0009812	flavonoid metabolic process	9/2423	15/18670	2.46182e-05	0.000509579	0.000373667	CYP1A1/UGT1A3/SULT1B1/UGT1A4/PPARGC1A/POR/UGT1A8/UGT1A5/UGT1A10	9	-1
BP	GO:0032645	regulation of granulocyte macrophage colony-stimulating factor production	9/2423	15/18670	2.46182e-05	0.000509579	0.000373667	CD84/RASGRP1/IL18/SYK/IL12B/IL1B/CD80/ISL1/PAEP	9	3
BP	GO:0014902	myotube differentiation	31/2423	112/18670	2.56381e-05	0.000528841	0.000387791	P2RX2/IGF1/ANKRD2/NIBAN2/KLF5/CAV3/TBX1/CD53/MYEF2/BDNF/CXCL9/KEL/MYOF/RYR1/TRIM72/ADGRB1/HDAC9/CYP26B1/MMP14/WNT1/WNT10B/ADAM12/ADGRB3/BHLHE41/TMEM119/SHOX2/MYOD1/CEACAM5/NKX2-5/DNER/BARX2	31	4.84934
BP	GO:0014074	response to purine-containing compound	38/2423	149/18670	2.59289e-05	0.000532984	0.000390829	ALDH3A1/AQP8/AQP9/REN/P2RX2/PFKFB1/ADIPOQ/P2RX3/PPARGC1A/CPS1/CDO1/TRPM2/P2RX1/AANAT/PIK3CG/AQP1/P2RX5/AREG/TRPC3/P2RY6/IGFBP5/DUOX1/PTAFR/PENK/P2RY12/PTGS2/SLC6A3/P2RY4/PTPRN/RYR1/HCN1/IL1B/WNT10B/SLC5A5/COL1A1/HCN4/CFTR/DUOX2	38	2.59554
BP	GO:0061005	cell differentiation involved in kidney development	19/2423	54/18670	2.60291e-05	0.000533191	0.000390982	ADIPOQ/GDNF/JAG1/GATA3/PTPRO/PRKX/IQGAP1/GLIS2/FOXC2/CD24/GLI3/NPHS2/BASP1/MMP9/LIF/LHX1/SIX2/FOXJ1/PROM1	19	3.44124
BP	GO:0097305	response to alcohol	53/2423	233/18670	2.63682e-05	0.000538275	0.000394709	CYP2E1/ADCY8/IL13/ADH7/GPLD1/CYP7A1/ADH6/ADIPOQ/CDO1/SLC2A4/MAP4K1/SLIT3/SPI1/AANAT/GATA3/PTGFR/TGFB1/CCL19/IL2/ADCY2/ADCY5/CCR5/SFRP1/PTGER4/NTRK3/P2RY6/CCR7/CYBB/PENK/GRIN1/SLC6A3/P2RY4/CD27/G6PD/UCN3/GRIN2A/GSTP1/GRAMD1B/SLIT2/TNC/RGS2/RGS4/CCL7/LEP/DRD2/APOBEC1/LRP8/CRHR1/HTR3A/CLDN18/CFTR/EFNA5/NEFL	53	4.5329
BP	GO:0003156	regulation of animal organ formation	15/2423	37/18670	2.68134e-05	0.000542808	0.000398033	AR/GDNF/TBX5/FGF1/HOXA11/DKK1/FGF10/FGFR1/HOXC11/WNT2/SULF1/ISL1/HAND2/EYA1/BMP7	15	2.84019
BP	GO:0035710	CD4-positive, alpha-beta T cell activation	27/2423	92/18670	2.69307e-05	0.000542808	0.000398033	CDH26/LGALS9/SLAMF6/CD86/NCKAP1L/PRKCQ/IL12RB1/IL12A/SASH3/GATA3/LY9/SPN/CCL19/IL2/MYB/GPR183/IL6/JAK3/PTGER4/IL18/IFNG/IL12B/SEMA4A/CD80/FUT7/IRF4/PLA2G2D	27	5.19615
BP	GO:1990868	response to chemokine	28/2423	97/18670	2.6957e-05	0.000542808	0.000398033	ACKR2/CCL16/TREM2/CCR6/SLIT3/CXCR6/CCL11/CXCR3/CCL19/CCR4/PADI2/XCR1/CXCL9/CCR5/CCR7/CXCL3/CCL22/CXCL8/CCL26/SLIT2/CXCR5/CCR8/CCL7/PF4V1/CXCL1/CXCL6/TFF2/CXCL5	28	4.53557
BP	GO:1990869	cellular response to chemokine	28/2423	97/18670	2.6957e-05	0.000542808	0.000398033	ACKR2/CCL16/TREM2/CCR6/SLIT3/CXCR6/CCL11/CXCR3/CCL19/CCR4/PADI2/XCR1/CXCL9/CCR5/CCR7/CXCL3/CCL22/CXCL8/CCL26/SLIT2/CXCR5/CCR8/CCL7/PF4V1/CXCL1/CXCL6/TFF2/CXCL5	28	4.53557
BP	GO:0003208	cardiac ventricle morphogenesis	23/2423	73/18670	3.01024e-05	0.000604088	0.000442969	JAG1/TBX5/MYL2/GATA3/MYH6/TGFB1/SMARCD3/TBX20/FOXC2/TNNI3/TGFB2/MYH7/SOX4/SFRP2/NOG/SOX11/NPY5R/ISL1/HAND2/NKX2-5/SEMA3C/COL11A1/GRHL2	23	4.79583
BP	GO:0042094	interleukin-2 biosynthetic process	11/2423	22/18670	3.05957e-05	0.000611913	0.000448707	CD86/PRKCQ/CD3E/CLEC7A/PTPRC/IL18/IL1A/IL1B/CD80/CARD11/IRF4	11	3.31662
BP	GO:0030324	lung development	42/2423	172/18670	3.0895e-05	0.000615819	0.000451572	RSPO2/CYP1A2/TBX4/ASCL1/LHX3/IL13/MME/HSD11B1/PTK7/TGFB3/TBX5/FGF7/ADAMTS2/IGFBP5/FGF1/GLI3/HHIP/PDGFRA/PHEX/AARD/TNF/GLI1/FGF10/MMP14/TNC/FGFR1/WNT2/PDPN/ABCA12/GLI2/NOG/SOX11/LIF/VANGL2/ITGA3/STRA6/LAMA1/NKX2-8/FOXJ1/GRHL2/AGR2/WNT7B	42	4.01189
BP	GO:0048638	regulation of developmental growth	72/2423	347/18670	3.10028e-05	0.000615894	0.000451626	NKD1/MT3/AR/IGF1/TNR/POR/PI16/FOXS1/PLXNA3/HNF1B/TBX5/CAV3/SASH3/EPHA7/LIMK1/ISLR2/MYH6/STC2/SEMA6D/POU3F2/SEMA3D/TBX20/FOXC2/BDNF/TRIM46/FGF20/SYT3/EPPK1/SFRP1/NTRK3/SEMA4D/ARX/SEMA4A/SLC6A3/BCL11A/NRK/NKX6-1/SPP1/G6PD/GLI1/DBN1/PLAC8/BASP1/MUSK/FGFR1/GAL/RGS2/OLFM1/ERBB4/CRABP2/RGS4/SYT4/LEP/WNT2/SEMA6A/RASAL1/L1CAM/SFRP2/NOG/DRD2/UNC13A/SEMA3A/PRL/MYOD1/ATP8A2/KCNK2/SEMA3E/NKX2-5/LPAR3/SEMA3C/…	72	7.07107
BP	GO:0070664	negative regulation of leukocyte proliferation	24/2423	78/18670	3.15903e-05	0.000625467	0.000458646	LGALS9/CD86/PDE5A/LILRB1/GREM1/SPN/TNFRSF21/TGFB1/IL2/IL10/CTLA4/HAVCR2/GPNMB/MNDA/IL2RA/GSTP1/TNFRSF13B/CD80/GAL/SCGB1A1/SOX11/PLA2G2D/FOXJ1/VTCN1	24	4.89898
BP	GO:0002715	regulation of natural killer cell mediated immunity	17/2423	46/18670	3.31761e-05	0.000654675	0.000480064	LGALS9/SLAMF6/VAV1/LILRB1/IL12A/ULBP2/ULBP3/SH2D1A/RASGRP1/CRTAM/HAVCR2/KIR2DL4/IL12B/ULBP1/LEP/RAET1L/SERPINB4	17	4.12311
BP	GO:0072080	nephron tubule development	27/2423	93/18670	3.33066e-05	0.000655067	0.000480352	GDNF/JAG1/HNF1B/GATA3/ADAMTS16/HOXB7/TGFB1/CD24/FGF1/IRX2/GLI3/CALB1/HOXA11/FMN1/KIF26B/WNT1/TFAP2B/FOXD1/NOG/TACSTD2/LIF/EYA1/LHX1/HOXD11/SIX2/PROM1/WNT7B	27	4.81125
BP	GO:0060078	regulation of postsynaptic membrane potential	36/2423	140/18670	3.45834e-05	0.000677926	0.000497114	P2RX2/CUX2/P2RX3/CHRNA4/P2RX1/GRM5/NLGN3/GRM1/CACNB3/P2RX5/CELF4/ADORA1/GABRG1/GRIN1/CHRNA5/IGSF9B/SNCA/CHRNA6/MPP2/GRIN2A/CHRNA1/CHRNA9/GABRA4/GABRA2/RGS4/GABRR1/GABBR1/DRD2/CHRND/GRID2/NRXN1/KCND2/CHRNA7/NLGN1/IGSF11/GABRA5	36	4.66667
BP	GO:0010001	glial cell differentiation	50/2423	218/18670	3.49731e-05	0.000683303	0.000501057	DRD1/ASCL1/MT3/TREM2/ADAM22/ROR1/TSPAN2/EGR2/SOX2/NLGN3/POU3F2/TNFRSF21/PLP1/TGFB1/IL6/MXRA8/FPR2/NTRK3/OLIG2/ID4/CNTNAP1/IFNG/PTPRZ1/GLI3/ROR2/PRDM8/SERPINE2/NKX6-1/S100B/TNF/FGF10/GSTP1/KCNJ10/IL1B/SOX4/BACE2/ZNF488/NOG/SOX11/TENM4/ZNF365/GAP43/LPAR1/LIF/NTRK2/LIN28A/FGF5/SPINT1/DNER/FA2H	50	6.22254
BP	GO:0016079	synaptic vesicle exocytosis	32/2423	119/18670	3.58933e-05	0.000698974	0.000512548	DRD1/CAMK2A/SYT9/ADRA1A/CHRNA4/STX3/P2RX1/APBA2/PRKCB/OTOF/RIMS4/PFN2/ADORA2B/CHRNA5/SV2A/SNCA/P2RY4/CHRNA6/SNPH/UNC13C/CTBP2/PRKCG/DOC2A/STXBP5L/SYT4/SNAP25/DRD2/UNC13A/PCLO/NLGN1/SYT8/CADPS	32	3.88909
BP	GO:0099560	synaptic membrane adhesion	12/2423	26/18670	3.67408e-05	0.000713133	0.00052293	SPARCL1/SLITRK2/LRRC4C/IGSF9B/NTNG2/GPC4/LRFN4/NTNG1/NRXN1/SLITRK1/NLGN1/EFNA5	12	2.88675
BP	GO:0006690	icosanoid metabolic process	31/2423	114/18670	3.73422e-05	0.000722437	0.000529753	CYP1A2/CYP1A1/CYP2A13/CYP2E1/CYP2B6/CYP2C9/CYP2A7/CYP2C8/CYP2A6/CES2/CYP4A11/PON1/PTGS1/FABP5/PTGES/ATP6V1B1/SYK/PTGS2/ABCC1/ALOX5AP/ALOX12B/IL1B/DPEP1/PTGIS/PLA2G4A/ALOX15B/PTGDS/ALOX5/PLA2G4F/ALOXE3/GGT6	31	1.25724
BP	GO:0001764	neuron migration	39/2423	157/18670	3.87831e-05	0.000746144	0.000547137	SOX14/DRD1/ASCL1/CAMK2A/CTNNA2/GATA3/ADGRG1/NEXMIF/CCR4/TBX20/TRIM46/NTRK3/FLNA/ARX/TWIST1/NKX6-1/KIRREL3/GPR173/ATOH1/DCDC2/LRP12/MARK1/DCLK1/FGFR1/DNAAF4/ERBB4/COL3A1/SEMA6A/FLRT2/DRD2/VAX1/SEMA3A/NTRK2/LHX1/NRG3/ITGA3/CDK5R2/DNER/GFRA3	39	4.64372
BP	GO:0003231	cardiac ventricle development	34/2423	130/18670	3.88196e-05	0.000746144	0.000547137	TBX3/PTK7/SLIT3/JAG1/TBX5/MYL2/GATA3/MYH6/TGFB1/SMARCD3/TBX20/FOXC2/SALL4/TNNI3/TGFB2/MYH7/SLIT2/FZD1/SOX4/SFRP2/NOG/FZD2/SOX11/NPY5R/ISL1/HAND2/XIRP2/VANGL2/KCNK2/NKX2-5/STRA6/SEMA3C/COL11A1/GRHL2	34	5.48795
BP	GO:0002294	CD4-positive, alpha-beta T cell differentiation involved in immune response	20/2423	60/18670	3.96112e-05	0.000758143	0.000555936	LGALS9/SLAMF6/CD86/IL12RB1/GATA3/LY9/SPN/CCL19/IL2/MYB/GPR183/IL6/JAK3/PTGER4/IL18/IFNG/IL12B/SEMA4A/CD80/IRF4	20	4.47214
BP	GO:0042759	long-chain fatty acid biosynthetic process	13/2423	30/18670	3.98281e-05	0.000758143	0.000555936	CYP3A4/CYP1A2/CYP1A1/CYP2E1/CYP2C9/CYP2C8/PLP1/ACOT11/PTGS2/ALOX12B/ALOX15B/ALOX5/ALOXE3	13	0.27735
BP	GO:0061037	negative regulation of cartilage development	13/2423	30/18670	3.98281e-05	0.000758143	0.000555936	CHADL/NKX3-2/GREM1/EFEMP1/ADAMTS12/CTSK/CCN4/LEP/GLI2/NOG/RFLNA/PTHLH/WNT9A	13	3.05085
BP	GO:0045076	regulation of interleukin-2 biosynthetic process	10/2423	19/18670	4.019e-05	0.000758418	0.000556137	CD86/PRKCQ/CD3E/CLEC7A/PTPRC/IL1A/IL1B/CD80/CARD11/IRF4	10	3.16228
BP	GO:0090102	cochlea development	18/2423	51/18670	4.02544e-05	0.000758418	0.000556137	PTK7/TBX1/GATA3/SLC17A8/HOXA1/NTRK3/CALB1/TIFAB/POU3F4/SLITRK6/CTHRC1/GLI2/FZD2/EYA1/VANGL2/KCNK2/GABRA5/MYO3A	18	4.24264
BP	GO:0097366	response to bronchodilator	18/2423	51/18670	4.02544e-05	0.000758418	0.000556137	DRD1/DRD5/MT3/CNR2/AQP1/CCL19/MMP3/RGS17/CCR7/OXTR/GRIN1/HDAC9/GRIN2A/DPEP1/RGS2/RGS4/DRD2/PPP1R1B	18	2.82843
BP	GO:0048566	embryonic digestive tract development	14/2423	34/18670	4.0355e-05	0.000758418	0.000556137	HNF1B/GLI3/PDGFRA/CXCL8/TNF/TGFB2/FGF10/FOXF2/GLI2/SOX11/SHOX2/OVOL2/SIX2/STRA6	14	3.74166
BP	GO:0032602	chemokine production	26/2423	89/18670	4.11096e-05	0.000770155	0.000564744	C1QTNF3/ADIPOQ/TREM2/LGALS9/S100A9/FFAR2/APOD/CLEC7A/CHIA/IL10/IL6/TLR7/IL18/HAVCR2/IFNG/ADORA2B/SYK/TWIST1/TNF/GSTP1/IL1B/AIRE/MCOLN2/ALOX15B/POSTN/CXCL6	26	4.31455
BP	GO:0046883	regulation of hormone secretion	58/2423	266/18670	4.16237e-05	0.000777326	0.000570002	C1QTNF3/GCK/ADCY8/REN/GLUL/RASL10B/SYT9/GPLD1/KCNB1/ADIPOQ/PDX1/C1QTNF1/FFAR2/MYB/ADCY5/SFRP1/ADORA1/ILDR1/FAM3D/IFNG/OSM/CD38/RETN/SLC2A1/FOXL2/NKX6-1/SPP1/UCN3/TNF/CYP19A1/IL1B/INHA/SOX4/FGFR1/GAL/STXBP5L/TFAP2B/MTNR1B/LEP/SNAP25/GPR27/SOX11/FGF23/DRD2/ISL1/IL11/LIF/ADRA2A/HTR2C/ITPR3/TAC1/CRHR1/GIPR/EPHA5/CHGA/SLC30A8/CFTR/EFNA5	58	4.98964
BP	GO:0032729	positive regulation of interferon-gamma production	21/2423	65/18670	4.34491e-05	0.000808864	0.000593129	LGALS9/SLAMF6/LTA/IL12RB1/IL12A/CD2/SASH3/CD3E/CLEC7A/IL2/RASGRP1/TLR7/IL18/HAVCR2/IL12B/PTPN22/TNFRSF13C/TNF/TLR8/IL1B/ISL1	21	4.58258
BP	GO:1905330	regulation of morphogenesis of an epithelium	43/2423	180/18670	4.38078e-05	0.000812985	0.000596151	ESR1/NKD1/AR/GDNF/PTK7/HNF1B/ROR1/CAV3/GATA3/HOXB7/TGFB1/DACT1/FGF7/SFRP1/ADAMTS12/FGF1/ROR2/PRICKLE1/GPC4/MLLT3/DKK1/TNF/FGF10/FZD1/HGF/SAPCD2/WNT1/FGFR1/AJAP1/FZD7/WNT2/CTHRC1/SFRP2/NOG/FZD2/TACSTD2/SULF1/LIF/LHX1/VANGL2/PSMA8/SIX2/BMP7	43	5.33745
BP	GO:0007269	neurotransmitter secretion	41/2423	169/18670	4.47911e-05	0.000826709	0.000606214	DRD1/CAMK2A/SYT9/ADRA1A/CHRNA4/SNCG/STX3/KCNMB4/P2RX1/APBA2/PRKCB/OTOF/RIMS4/PFN2/ADORA2B/SNCAIP/CHRNA5/SV2A/SNCA/P2RY4/CHRNA6/CACNA1B/SNPH/UNC13C/CTBP2/GAD1/PRKCG/DOC2A/GRM4/STXBP5L/SYT4/SNAP25/DRD2/UNC13A/PCLO/NRXN1/GAD2/PPFIA4/NLGN1/SYT8/CADPS	41	4.84139
BP	GO:0048608	reproductive structure development	85/2423	431/18670	4.48266e-05	0.000826709	0.000606214	ESR1/REN/LHX3/TBX3/MME/SRD5A2/AR/ETNK2/ANG/CRIP1/SLIT3/DCN/KIF18A/GATA3/STC2/ADGRG1/PTX3/UTF1/IL10/LDOC1/SFRP1/ID4/SERPINB5/GLI3/HOXA11/FLNA/ROR2/TIFAB/PTGS2/SERPINE2/RETN/PLAC1/PDGFRA/APELA/PTPRN/FOXL2/NRK/SPP1/BMP5/TGFB2/GLI1/FGF10/CYP19A1/SLIT2/BASP1/MMP14/INHA/TNC/SYCP2/PLCD3/MDFI/PTGIS/TYRO3/GJB3/FOXF2/LEP/WNT2/PCYT1B/GLI2/SFRP2/ALOX15B/NOG/SULF1/DMRT1/LIF/SEMA3A/PSAPL1/BMPR1B/LHX1/TSPY10/SP…	85	7.26717
BP	GO:0001912	positive regulation of leukocyte mediated cytotoxicity	19/2423	56/18670	4.65285e-05	0.000854203	0.000626375	SLAMF6/VAV1/IL12RB1/IL12A/CD1C/ULBP2/ULBP3/SH2D1A/ITGAM/RASGRP1/PTPRC/CRTAM/IL12B/STAP1/CD1E/ULBP1/CD1B/RAET1L/CD1A	19	4.3589
BP	GO:0006024	glycosaminoglycan biosynthetic process	30/2423	110/18670	4.6606e-05	0.000854203	0.000626375	UST/CSGALNACT1/DCN/OGN/TGFB1/HS3ST5/CHST1/XYLT1/OMD/PRELP/CHST6/CHST11/HS3ST1/CHST3/ACAN/GPC4/CEMIP/HS6ST2/B3GNT7/IL1B/HAS1/GPC2/FMOD/B3GNT3/LUM/HAS2/CHST5/VCAN/GALNT5/HS3ST6	30	5.11208
BP	GO:0015849	organic acid transport	69/2423	333/18670	4.69739e-05	0.000855648	0.000627435	SLCO1B3/SLC1A2/ACE2/SLC16A11/SLC6A13/SLC27A5/AQP9/SLC13A3/THRSP/SLC6A12/FABP4/ABCB11/SLC13A5/GLS2/ABCB4/SLC10A1/SLC5A6/CYP4A11/SLCO1A2/SLC25A15/SLC16A12/SLCO3A1/SLC7A8/SLC7A1/SLC38A1/SLC38A5/SLC17A8/EMB/ADORA1/SLC16A3/SLC6A8/SLC10A4/SYK/SV2A/SLC6A5/SNCA/TNFRSF11A/OCA2/SLC7A7/ABCC1/SLC1A5/SLC10A2/KCNJ10/IL1B/PLA2R1/LCN1/RGS2/SLC6A19/RGS4/SYT4/SLC6A17/LEP/SNAP25/PDPN/SLC13A1/PLA2G4A/SLC6A6/FOLR1/DR…	69	3.25042
BP	GO:0046942	carboxylic acid transport	69/2423	333/18670	4.69739e-05	0.000855648	0.000627435	SLCO1B3/SLC1A2/ACE2/SLC16A11/SLC6A13/SLC27A5/AQP9/SLC13A3/THRSP/SLC6A12/FABP4/ABCB11/SLC13A5/GLS2/ABCB4/SLC10A1/SLC5A6/CYP4A11/SLCO1A2/SLC25A15/SLC16A12/SLCO3A1/SLC7A8/SLC7A1/SLC38A1/SLC38A5/SLC17A8/EMB/ADORA1/SLC16A3/SLC6A8/SLC10A4/SYK/SV2A/SLC6A5/SNCA/TNFRSF11A/OCA2/SLC7A7/ABCC1/SLC1A5/SLC10A2/KCNJ10/IL1B/PLA2R1/LCN1/RGS2/SLC6A19/RGS4/SYT4/SLC6A17/LEP/SNAP25/PDPN/SLC13A1/PLA2G4A/SLC6A6/FOLR1/DR…	69	3.25042
BP	GO:0032604	granulocyte macrophage colony-stimulating factor production	9/2423	16/18670	4.9772e-05	0.000903834	0.000662769	CD84/RASGRP1/IL18/SYK/IL12B/IL1B/CD80/ISL1/PAEP	9	3
BP	GO:0048864	stem cell development	25/2423	85/18670	5.06808e-05	0.000915992	0.000671684	HTR2B/GDNF/FGF19/JAG1/TBX1/SEMA6D/SEMA3D/FOXC2/PTPRC/SEMA4D/SEMA4A/TWIST1/ERBB4/SEMA6A/FOLR1/SOX11/ISL1/HAND2/SEMA3A/OVOL2/SEMA3E/ALX1/SEMA3C/BMP7/PITX2	25	4.2
BP	GO:0007611	learning or memory	56/2423	256/18670	5.09498e-05	0.000915992	0.000671684	GRPR/DRD1/RASGRF1/ADCY8/MME/DRD5/GALR3/CUX2/TNR/RAG1/CPEB3/FOXB1/JPH3/TBR1/CCL11/EGR2/GRM5/NLGN3/BDNF/KCNK10/PTPRZ1/OXTR/CALB1/FOXO6/GRIN1/TIFAB/PTGS2/S100B/DKK1/SLC24A2/GRIN2A/PAK6/EN1/PRKCG/HRH2/NTF4/MUSK/MAP1A/SYT4/ADGRB3/SNAP25/DRD2/NTRK2/NRXN1/NPTX2/ITGA3/LHX8/CHRNA7/KCNK2/ITPR3/TAC1/CRHR1/STRA6/PPP1R1B/GABRA5/PAK5	56	4.54344
BP	GO:0060346	bone trabecula formation	7/2423	10/18670	5.15311e-05	0.000915992	0.000671684	GREM1/SFRP1/WNT10B/MMP2/COL1A1/MSX2/FBN2	7	2.64575
BP	GO:0099643	signal release from synapse	41/2423	170/18670	5.1737e-05	0.000915992	0.000671684	DRD1/CAMK2A/SYT9/ADRA1A/CHRNA4/SNCG/STX3/KCNMB4/P2RX1/APBA2/PRKCB/OTOF/RIMS4/PFN2/ADORA2B/SNCAIP/CHRNA5/SV2A/SNCA/P2RY4/CHRNA6/CACNA1B/SNPH/UNC13C/CTBP2/GAD1/PRKCG/DOC2A/GRM4/STXBP5L/SYT4/SNAP25/DRD2/UNC13A/PCLO/NRXN1/GAD2/PPFIA4/NLGN1/SYT8/CADPS	41	4.84139
BP	GO:0002287	alpha-beta T cell activation involved in immune response	20/2423	61/18670	5.18053e-05	0.000915992	0.000671684	LGALS9/SLAMF6/CD86/IL12RB1/GATA3/LY9/SPN/CCL19/IL2/MYB/GPR183/IL6/JAK3/PTGER4/IL18/IFNG/IL12B/SEMA4A/CD80/IRF4	20	4.47214
BP	GO:0002293	alpha-beta T cell differentiation involved in immune response	20/2423	61/18670	5.18053e-05	0.000915992	0.000671684	LGALS9/SLAMF6/CD86/IL12RB1/GATA3/LY9/SPN/CCL19/IL2/MYB/GPR183/IL6/JAK3/PTGER4/IL18/IFNG/IL12B/SEMA4A/CD80/IRF4	20	4.47214
BP	GO:0042490	mechanoreceptor differentiation	20/2423	61/18670	5.18053e-05	0.000915992	0.000671684	CLRN1/USH2A/MYCL/JAG1/PDZD7/FGF20/NTRK3/SLC44A4/SLITRK6/USH1G/ATOH1/NTF4/FGFR1/CTHRC1/FZD2/MCOLN3/NTRK2/VANGL2/ESRP1/GABRA5	20	3.1305
BP	GO:0006631	fatty acid metabolic process	77/2423	383/18670	5.18126e-05	0.000915992	0.000671684	CYP3A4/CYP1A2/CYP1A1/CYP2A13/ABHD1/CYP2E1/SLC27A5/CYP2B6/TECRL/CYP2C9/CYP2A7/CYP2C8/ADH7/ACSM5/PDK4/CYP2A6/ACADL/ACSM2A/AMACR/PCK2/ACSM2B/ACSL6/CYP7A1/APOC3/APOA5/ACSL5/ADIPOQ/CES2/BAAT/EHHADH/RGN/APOC1/PPARGC1A/ACSM6/CYP4A11/GSTZ1/POR/HAO1/PON1/ACSM3/ACOT6/GCDH/HACD4/C1QTNF2/ACSS1/PTGS1/UGT1A8/PLP1/PDP1/FABP5/ACOT11/PTGES/ATP6V1B1/GLYATL2/PTGS2/TWIST1/SNCA/APOA4/ALOX5AP/ALOX12B/ACOD1/GSTP1/IL1B/…	77	-0.797724
BP	GO:0051251	positive regulation of lymphocyte activation	69/2423	334/18670	5.1834e-05	0.000915992	0.000671684	IL13/IGF1/RAG1/LGALS9/CD86/ZAP70/VAV1/NCKAP1L/CLECL1/ADAM8/LILRB1/LCK/PRKCQ/IL12RB1/IL12A/SASH3/CD70/GATA3/CORO1A/TNFSF9/SIRPB1/NCK2/CD3E/TNFSF13B/TGFB1/CLEC7A/CCL19/CD5/IL2/MYB/TESPA1/BTLA/GPR183/FCRL3/IL6/JAK3/RASGRP1/CD24/SIRPG/PTPRC/IL18/CTLA4/IL7R/HAVCR2/IFNG/CCR7/GLI3/SYK/LILRB4/IL12B/CD38/ICOS/CD27/IL2RA/TNFRSF13C/FGF10/IL1B/CD80/CARD11/MMP14/SPTA1/IGLL1/LEP/PDCD1/GLI2/IGLL5/HHLA2/TAC1/VTC…	69	7.58431
BP	GO:0021782	glial cell development	31/2423	116/18670	5.3696e-05	0.000946072	0.000693741	DRD1/ASCL1/MT3/TREM2/ADAM22/ROR1/TSPAN2/POU3F2/PLP1/TGFB1/IL6/MXRA8/FPR2/NTRK3/ID4/CNTNAP1/IFNG/ROR2/PRDM8/TNF/GSTP1/KCNJ10/IL1B/SOX4/BACE2/ZNF488/SOX11/TENM4/LPAR1/NTRK2/FA2H	31	4.49013
BP	GO:0032102	negative regulation of response to external stimulus	74/2423	365/18670	5.4099e-05	0.000948457	0.00069549	C1QTNF3/DRD1/CTNNA2/SAA1/NLRP6/ADIPOQ/IGF1/TNR/F11/PLG/KLKB1/APCS/CNR2/FFAR4/PLXNA3/NBL1/C1QTNF1/APOD/GREM1/GATA3/SEMA6D/PTPRO/GPR18/PADI2/SEMA3D/IL2/CACNB3/SMPDL3B/IL10/EPPK1/FPR2/ADORA1/MMP28/PTPRC/PTGER4/SEMA4D/HAVCR2/SLAMF8/GRIN1/TAFA3/IL12B/SEMA4A/SLC6A3/SERPINE2/PDGFRA/NLRP7/STAP1/SPP1/IL2RA/CYP19A1/ACOD1/GSTP1/ABR/SLIT2/SIGLEC10/HGF/PTGIS/AJAP1/TYRO3/PLAUR/FAP/UBASH3B/LEP/SEMA6A/DRD2/NPY5R…	74	5.81238
BP	GO:0032330	regulation of chondrocyte differentiation	18/2423	52/18670	5.41518e-05	0.000948457	0.00069549	CHADL/POR/NKX3-2/GREM1/RUNX2/EFEMP1/ADAMTS12/GLI3/HOXA11/CCN4/SCIN/GLI2/RFLNA/PTHLH/SHOX2/WNT9A/BMPR1B/SIX2	18	3.29983
BP	GO:0030323	respiratory tube development	42/2423	176/18670	5.4837e-05	0.000957625	0.000702213	RSPO2/CYP1A2/TBX4/ASCL1/LHX3/IL13/MME/HSD11B1/PTK7/TGFB3/TBX5/FGF7/ADAMTS2/IGFBP5/FGF1/GLI3/HHIP/PDGFRA/PHEX/AARD/TNF/GLI1/FGF10/MMP14/TNC/FGFR1/WNT2/PDPN/ABCA12/GLI2/NOG/SOX11/LIF/VANGL2/ITGA3/STRA6/LAMA1/NKX2-8/FOXJ1/GRHL2/AGR2/WNT7B	42	4.01189
BP	GO:0021520	spinal cord motor neuron cell fate specification	8/2423	13/18670	5.57743e-05	0.000965449	0.00070795	LHX3/GLI3/NKX6-1/ISL2/GLI2/MNX1/ISL1/HOXC10	8	2.12132
BP	GO:0032725	positive regulation of granulocyte macrophage colony-stimulating factor production	8/2423	13/18670	5.57743e-05	0.000965449	0.00070795	RASGRP1/IL18/SYK/IL12B/IL1B/CD80/ISL1/PAEP	8	2.82843
BP	GO:0061430	bone trabecula morphogenesis	8/2423	13/18670	5.57743e-05	0.000965449	0.00070795	GREM1/SFRP1/SEMA4D/WNT10B/MMP2/COL1A1/MSX2/FBN2	8	2.82843
BP	GO:0035270	endocrine system development	33/2423	127/18670	5.76081e-05	0.000990637	0.00072642	ASCL1/TG/LHX3/PDX1/TBX1/SOX2/GATA3/NEUROG3/HOXB3/POU3F2/IL6/SLC6A3/PDGFRA/PITX1/NKX6-1/BMP5/GLI1/FGF10/SOX4/GLI2/NOG/DRD2/INSM1/MNX1/ISL1/FOXE1/NKX2-5/CRHR1/STRA6/GIPR/PITX2/SIX3/NR0B1	33	4.7001
BP	GO:0044706	multi-multicellular organism process	50/2423	222/18670	5.76209e-05	0.000990637	0.00072642	EDDM3A/CYP1A1/ESR1/DSG1/AR/LGALS9/AKR1B1/TGFB3/P2RX1/STC2/PTGFR/TGFB1/DSG2/PRLHR/LDOC1/HAVCR2/IGFBP5/PTAFR/OXTR/FBLN1/PTGS2/CD38/SERPINE2/SLC2A1/APELA/NRK/SPP1/TFCP2L1/CLDN4/ACOD1/IL1B/RGS2/PTGIS/RLN2/MMP2/EPYC/COL16A1/LEP/SCGB1A1/PTHLH/MMP9/DDR1/PNOC/LIF/PRL/ITGA3/HMX3/TAC1/CRHR1/MMP7	50	5.65685
BP	GO:0008217	regulation of blood pressure	43/2423	182/18670	5.77829e-05	0.000990637	0.00072642	CYP11B2/ACE2/KLK3/KLK2/REN/MME/P2RX2/DRD5/RASL10B/AR/ADRA1A/GCGR/ADIPOQ/CYP4A11/ACSM3/BRS3/ASIC2/P2RX1/PTGS1/MYH6/ADAMTS16/PTPRO/AVPR1B/GUCY1A1/RENBP/ADORA1/PTAFR/OXTR/UTS2/PTGS2/NPPB/GNB3/TNNI3/CACNA1B/COL1A2/UTS2B/LEP/DRD2/TACR3/POSTN/KLK1/TAC1/CHGA	43	1.98248
BP	GO:0061458	reproductive system development	85/2423	434/18670	5.78987e-05	0.000990637	0.00072642	ESR1/REN/LHX3/TBX3/MME/SRD5A2/AR/ETNK2/ANG/CRIP1/SLIT3/DCN/KIF18A/GATA3/STC2/ADGRG1/PTX3/UTF1/IL10/LDOC1/SFRP1/ID4/SERPINB5/GLI3/HOXA11/FLNA/ROR2/TIFAB/PTGS2/SERPINE2/RETN/PLAC1/PDGFRA/APELA/PTPRN/FOXL2/NRK/SPP1/BMP5/TGFB2/GLI1/FGF10/CYP19A1/SLIT2/BASP1/MMP14/INHA/TNC/SYCP2/PLCD3/MDFI/PTGIS/TYRO3/GJB3/FOXF2/LEP/WNT2/PCYT1B/GLI2/SFRP2/ALOX15B/NOG/SULF1/DMRT1/LIF/SEMA3A/PSAPL1/BMPR1B/LHX1/TSPY10/SP…	85	7.26717
BP	GO:0043491	protein kinase B signaling	58/2423	269/18670	5.81116e-05	0.000991414	0.00072699	ESR1/TMEM100/MT3/IGF1/EPGN/FGF19/CD86/VAV1/ADAM8/C1QTNF1/LCK/CAV3/PIK3CG/GATA3/PIK3CD/TGFB1/CCL19/AREG/FGF20/RAC2/FGF7/MEIS3/TRAT1/HPSE/IL18/TSPYL5/IGFBP5/CCR7/FGF1/P2RY12/OSM/ICOS/PDGFRA/IGF1R/PKHD1/TNF/F3/FGF10/IL1B/CD80/CD19/HGF/FGFR1/TYRO3/ERBB4/MST1R/LEP/FGF4/FGF23/DRD2/TGFA/CALCR/NTRK2/LIN28A/BANK1/FGF5/EREG/SFRP5	58	6.56532
BP	GO:0051953	negative regulation of amine transport	12/2423	27/18670	5.8339e-05	0.000992434	0.000727738	ADORA1/P2RY12/SNCA/RGS2/RGS4/SYT4/LEP/DRD2/NPY5R/ADRA2A/CRHR1/CHGA	12	3.4641
BP	GO:0099174	regulation of presynapse organization	13/2423	31/18670	6.04699e-05	0.00102574	0.000752157	NLGN3/SLITRK2/NTRK3/SNCA/NTNG2/GPC4/LRFN4/DKK1/FZD1/CBLN2/NRXN1/SLITRK1/NLGN1	13	3.60555
BP	GO:0051346	negative regulation of hydrolase activity	90/2423	466/18670	6.07196e-05	0.00102703	0.000753105	SMR3A/SMR3B/OPRPN/CSN2/COL7A1/SERPINC1/MT3/APOC3/LEPR/RAG1/LPA/RGN/APOC1/ELFN1/WFDC5/POR/FETUB/APCS/CARD17/SPRED1/PI16/TNFAIP8/NCKAP1L/BIRC3/ARFGEF3/CRB2/BICD1/CRYAB/PPP1R14D/SPINK4/IQGAP1/AQP1/SERPINI2/PI3/LXN/PTX3/RENBP/RHOH/WFDC10B/CR1/COL28A1/SEMA4D/SERPINB5/CST2/MICAL1/TFPI2/PTGS2/SERPINE2/SNCA/ITIH6/NLRP7/CD27/COL6A3/TNNI3/ANOS1/HDAC9/TNF/TGFB2/TIMP2/SLIT2/DLG3/PLA2R1/DPEP1/HGF/PCSK1N/LCN1/…	90	5.6921
BP	GO:0035272	exocrine system development	17/2423	48/18670	6.23065e-05	0.00104629	0.000767232	PDX1/TGFB3/TGFB1/CELA1/FGF7/IGSF3/TFCP2L1/TNF/TGFB2/FGF10/PTF1A/HGF/FGFR1/SEMA3A/SEMA3C/BMP7/LAMA1	17	4.12311
BP	GO:0046850	regulation of bone remodeling	17/2423	48/18670	6.23065e-05	0.00104629	0.000767232	PDK4/LEPR/ADAM8/GREM1/TNFRSF11B/MC4R/IL6/SFRP1/SYK/CD38/TNFRSF11A/SPP1/UBASH3B/LEP/TMEM119/CLDN18/IL20RA	17	3.15296
BP	GO:0014032	neural crest cell development	24/2423	81/18670	6.23952e-05	0.00104629	0.000767232	HTR2B/GDNF/FGF19/JAG1/TBX1/SEMA6D/SEMA3D/FOXC2/SEMA4D/SEMA4A/TWIST1/ERBB4/SEMA6A/FOLR1/SOX11/ISL1/HAND2/SEMA3A/OVOL2/SEMA3E/ALX1/SEMA3C/BMP7/PITX2	24	4.08248
BP	GO:0001776	leukocyte homeostasis	25/2423	86/18670	6.27423e-05	0.00104629	0.000767232	RAG1/RIPK3/LGALS9/NCKAP1L/LMO1/DOCK10/CORO1A/PIK3CD/TNFSF13B/TGFB1/SIT1/IL2/GPR183/IL6/JAK3/GPR174/IL2RA/TNFRSF13C/TNFRSF13B/SPTA1/GAPT/FOXN1/PMAIP1/TNFRSF17/CXCL6	25	4.6
BP	GO:0030101	natural killer cell activation	25/2423	86/18670	6.27423e-05	0.00104629	0.000767232	KLRF2/IL12A/CD2/CORO1A/PIK3CD/ULBP2/ITGB2/IL2/ULBP3/RASGRP1/PTPRC/PGLYRP3/IL18/HAVCR2/IL12B/PTPN22/ELF4/SLAMF7/ULBP1/UNC13D/TYRO3/LEP/IL21R/RAET1L/PGLYRP4	25	5
BP	GO:0007517	muscle organ development	81/2423	410/18670	6.29715e-05	0.00104717	0.000767872	MYH3/P2RX2/HLF/IGF1/PI16/ANKRD2/NIBAN2/JPH1/DCN/NEB/KLF5/TBX5/MYL2/EGR2/GREM1/CAV3/TBX1/GSC/MYH6/CRYAB/TGFB1/TBX20/FOXC2/FGF20/CHODL/KEL/POPDC3/ANKRD1/ASB2/TIFAB/TWIST1/SGCG/RYR1/PITX1/ANKRD33/COL6A3/TRIM72/FOXL2/ADGRB1/G6PD/TNNI3/S100B/DKK1/HDAC9/TGFB2/GLI1/PAX3/MYH7/BASP1/CYP26B1/FZD1/CHRNA1/MYH15/WNT10B/FGFR1/RGS2/FZD7/ERBB4/RGS4/COL3A1/WNT2/MSC/MYBPC2/NOG/FZD2/SOX11/SHOX2/ISL1/VAX1/LIF/CHRND/…	81	8.11111
BP	GO:0001508	action potential	34/2423	133/18670	6.39941e-05	0.00105982	0.000777154	CACNA1I/DRD1/CTNNA3/KCNJ8/ADRA1A/KCNB1/P2RX3/CLCN1/CHRNA4/KCNE2/CNR2/KCNMB4/CAV3/P2RX1/DSG2/CACNA2D1/CACNB3/ANK2/SCN2B/NTRK3/CNTNAP1/FLNA/KCNE4/SCN7A/KCNH2/CHRNA1/SCN3B/CACNA1G/ANK3/MTNR1B/NTRK2/KCND2/TAC1/HCN4	34	2.40098
BP	GO:0007613	memory	31/2423	117/18670	6.40907e-05	0.00105982	0.000777154	DRD1/RASGRF1/ADCY8/CUX2/CPEB3/JPH3/BDNF/KCNK10/OXTR/CALB1/FOXO6/GRIN1/PTGS2/S100B/SLC24A2/GRIN2A/PAK6/HRH2/NTF4/MUSK/MAP1A/SYT4/DRD2/ITGA3/CHRNA7/KCNK2/ITPR3/TAC1/CRHR1/PPP1R1B/PAK5	31	3.77171
BP	GO:1902107	positive regulation of leukocyte differentiation	36/2423	144/18670	6.55328e-05	0.00108065	0.000792428	RAG1/TREM2/LGALS9/CD86/ZAP70/NCKAP1L/ADAM8/IL12RB1/EVI2B/IL12A/SASH3/GATA3/TNFSF9/TGFB1/CCL19/IL2/MYB/TESPA1/RASGRP1/PTPRC/IL18/IL7R/IFNG/GLI3/SYK/LILRB4/ROR2/IL12B/TESC/CD27/IL2RA/TNF/CD80/MMP14/GLI2/LIF	36	5.66667
BP	GO:0017158	regulation of calcium ion-dependent exocytosis	30/2423	112/18670	6.71608e-05	0.00110442	0.000809857	CACNA1I/DRD1/CAMK2A/SYT9/ADRA1A/KCNB1/CHRNA4/P2RX1/CBARP/APBA2/PRKCB/SYT3/RIMS4/PFN2/ADORA2B/CHRNA5/P2RY4/CHRNA6/PRKCG/DOC2A/CACNA1G/STXBP5L/SYT4/DRD2/ADRA2A/NLGN1/CDK5R2/TRPV6/SYT8/SYT13	30	2.92119
BP	GO:0001101	response to acid chemical	70/2423	343/18670	6.85801e-05	0.00112153	0.000822403	SLC1A2/ASCL1/CYP2E1/RXRG/PDK4/ABCB4/ADIPOQ/PPARGC1A/CPS1/PON1/CPEB3/CDO1/PTK7/LTK/AKR1B1/PDX1/FFAR2/TEAD2/TBX1/AANAT/HOXA2/PTGFR/AQP1/CCL19/MYB/ASNS/UCP1/SFRP1/PTGER4/NTRK3/P2RY6/PTGES/CCR7/PTAFR/CYBB/HPCA/GRIN1/PTGS2/CD38/PDGFRA/TESC/P2RY4/GPRC6A/BCL11A/MAPK10/DKK1/TNF/GSTP1/EPHA3/CYP26B1/TNC/WNT10B/FZD7/COL1A2/MMP2/GJB3/COL1A1/COL3A1/COL16A1/LEP/RORB/WNT2/FOLR1/SCGB1A1/WNT9A/NTRK2/SST/CPEB1/GIP…	70	5.49805
BP	GO:0072330	monocarboxylic acid biosynthetic process	70/2423	343/18670	6.85801e-05	0.00112153	0.000822403	CYP3A4/CYP1A2/CYP1A1/GCK/ABHD1/CYP2E1/SLC27A5/CYP8B1/UST/TECRL/ABCB11/CYP2C9/CYP2C8/ACSM5/PDK4/ACADL/CYP39A1/ACSM2A/AMACR/ACSM2B/CYP7A1/PFKFB1/APOC3/APOA5/ALDOB/ADIPOQ/BAAT/SLC4A1/IGF1/RGN/APOC1/PPARGC1A/ACSM6/ACSM3/HACD4/FGF19/ACSS1/DCN/PGM2L1/PTGS1/PLP1/FABP5/HK3/ASNS/ACOT11/PTGES/IFNG/PTGS2/APOA4/ALOX5AP/ALOX12B/IL1B/GAD1/PTGIS/PFKFB3/CRABP2/HACD1/ALOX15B/ELOVL7/PTGDS/ALOX5/ELOVL4/PKM/PFKP/PLA…	70	0.239046
BP	GO:0050905	neuromuscular process	29/2423	107/18670	7.00187e-05	0.00113953	0.000835603	DRD1/CTNNA2/CLRN1/TNR/FOXS1/JPH3/ADCY5/HOXA1/CNTNAP1/PENK/GRIN1/TIFAB/SLC6A3/SLITRK6/GRIN2A/ABR/USH1G/CHRNA1/DRD2/HOXC10/CHRND/GRID2/ATP8A2/NRXN1/COMP/HMX3/STRA6/NEFL/UCHL1	29	3.8996
BP	GO:0046688	response to copper ion	16/2423	44/18670	7.06608e-05	0.00113953	0.000835603	MT1B/CYP1A2/CYP1A1/MT1X/MT1M/MT2A/MT1G/MT3/MT1E/MT1H/SORD/AANAT/AQP1/SOD3/IL1A/SNCA	16	-1.5
BP	GO:0016331	morphogenesis of embryonic epithelium	37/2423	150/18670	7.09497e-05	0.00113953	0.000835603	AR/MTHFD1/GDNF/PTK7/PDX1/HNF1B/TEAD2/GATA3/TGFB1/SALL4/SFRP1/IRX2/TWIST1/PRICKLE1/BMP5/TGFB2/FGF10/FZD1/TFAP2A/SOX4/WNT2/CTHRC1/GLI2/SFRP2/NOG/FZD2/FOLR1/SULF1/SOX11/VANGL2/SPINT2/OVOL2/ALX1/BMP7/SPINT1/GRHL2/WNT7B	37	5.09637
BP	GO:0003215	cardiac right ventricle morphogenesis	10/2423	20/18670	7.10283e-05	0.00113953	0.000835603	JAG1/GATA3/SMARCD3/TBX20/TGFB2/SOX4/ISL1/HAND2/NKX2-5/SEMA3C	10	3.16228
BP	GO:0019373	epoxygenase P450 pathway	10/2423	20/18670	7.10283e-05	0.00113953	0.000835603	CYP1A2/CYP1A1/CYP2A13/CYP2E1/CYP2B6/CYP2C9/CYP2A7/CYP2C8/CYP2A6/CYP4A11	10	-3.16228
BP	GO:0043586	tongue development	10/2423	20/18670	7.10283e-05	0.00113953	0.000835603	KCNE2/TBX1/GLI3/CYP26B1/WNT10A/NTF4/WNT10B/HOXC13/HAND2/BNC2	10	2.52982
BP	GO:0051797	regulation of hair follicle development	10/2423	20/18670	7.10283e-05	0.00113953	0.000835603	DKK4/HPSE/TNF/TGFB2/WNT10B/GAL/CDH3/KRT17/MSX2/FOXN1	10	2.52982
BP	GO:0006968	cellular defense response	18/2423	53/18670	7.21322e-05	0.00115412	0.000846297	CCR6/CD300C/KLRC3/FCMR/ITK/SPN/SH2D1A/CXCL9/CCR5/NCF2/TRAT1/KLRC2/KIR2DL4/ADORA2B/MNDA/NCF1/DCDC2/CLEC5A	18	4.24264
BP	GO:0015837	amine transport	28/2423	102/18670	7.25744e-05	0.00115806	0.00084919	DRD1/ACE2/AQP9/SYT9/KCNB1/CHRNA4/GDNF/SNCG/SLC18A1/FGF20/SYT3/ADORA1/OXTR/P2RY12/SV2A/SNCA/CHRNA6/RGS2/RGS4/SYT4/LEP/DRD2/NPY5R/ADRA2A/CRHR1/SYT8/CHGA/SYT13	28	2.64575
BP	GO:0061035	regulation of cartilage development	22/2423	72/18670	7.48112e-05	0.00119054	0.000873009	CHADL/POR/NKX3-2/GREM1/TGFB1/RUNX2/EFEMP1/ADAMTS12/CTSK/GLI3/HOXA11/CCN4/SCIN/LEP/GLI2/NOG/RFLNA/PTHLH/SHOX2/WNT9A/BMPR1B/SIX2	22	3.83761
BP	GO:1990266	neutrophil migration	31/2423	118/18670	7.62675e-05	0.00121005	0.000887315	SAA1/CCL16/S100A9/VAV1/CCL11/NCKAP1L/ADAM8/PIK3CG/PIK3CD/ITGB2/CCL19/CXCL9/RAC2/CCR7/SLAMF8/SYK/CXCL3/CCL22/CSF3R/CXCL8/TGFB2/CCL26/SLIT2/IL1B/MCOLN2/CCL7/PF4V1/CD177/CXCL1/CXCL6/CXCL5	31	4.84934
BP	GO:0006865	amino acid transport	36/2423	145/18670	7.64459e-05	0.00121005	0.000887315	SLC1A2/ACE2/SLC6A13/SLC6A12/GLS2/SLC25A15/SLC16A12/SLC7A8/SLC7A1/SLC38A1/SLC38A5/SLC17A8/ADORA1/SLC6A8/SV2A/SLC6A5/SNCA/OCA2/SLC7A7/SLC1A5/KCNJ10/RGS2/SLC6A19/RGS4/SYT4/SLC6A17/LEP/SNAP25/PDPN/SLC6A6/NPY5R/SLC7A4/NTRK2/PPFIA4/SLC6A14/SLC6A15	36	3.66667
BP	GO:0051937	catecholamine transport	23/2423	77/18670	7.66952e-05	0.00121053	0.000887664	DRD1/SLC6A2/SYT9/KCNB1/SLC22A1/CHRNA4/GDNF/SNCG/FGF20/SYT3/OXTR/P2RY12/SLC6A3/SNCA/CHRNA6/SYT4/DRD2/ADRA2A/MAPK15/CRHR1/SYT8/CHGA/SYT13	23	1.87663
BP	GO:0099003	vesicle-mediated transport in synapse	47/2423	207/18670	7.6885e-05	0.00121053	0.000887664	DRD1/CAMK2A/SYT9/ADRA1A/CHRNA4/SLC2A4/STX3/P2RX1/KIF5C/NLGN3/APBA2/PRKCB/OTOF/TRIM46/RIMS4/PFN2/HPCA/ADORA2B/CHRNA5/SV2A/SNCA/DNM1/CALY/P2RY4/CHRNA6/MAPK10/SNPH/UNC13C/CTBP2/RAB27B/AMPH/SNCB/PRKCG/DOC2A/STXBP5L/SYT4/KIF5A/SNAP25/DRD2/AP3B2/UNC13A/PCLO/GRIP1/NLGN1/SYT8/CADPS/SNAP91	47	5.10527
BP	GO:0010469	regulation of signaling receptor activity	41/2423	173/18670	7.88674e-05	0.00123845	0.000908136	ACTN2/RASGRF1/TAFA4/GREM2/ADH7/DKK4/MTRNR2L11/PPARGC1A/CGA/MTRNR2L1/EPGN/GREM1/CAV3/BICD1/GRIA4/NLGN3/NCK2/IL10/LDOC1/ADORA1/IFNG/GRIN1/NCF1/DKK1/GRIN2A/DLG3/GPRC5A/LYPD6/NOG/SHISA9/TGFA/CALCR/GRIA2/ADRA2A/NPTX2/ANXA3/NLGN1/EREG/NEFL/NPTX1/LYPD6B	41	3.27965
BP	GO:0002683	negative regulation of immune system process	89/2423	463/18670	7.93029e-05	0.00124199	0.000910736	NLRP6/ADIPOQ/C4BPA/C4BPB/APCS/LGALS9/CD86/CNR2/IL13RA2/CCL28/PDE5A/LILRB1/NBL1/TGFB3/APOD/GREM1/MIXL1/CD84/SPN/TNFRSF21/GPR18/TGFB1/GPR171/UBASH3A/HLA-DOA/PADI2/IL2/SMPDL3B/IL10/FCRL3/JAK3/CR1/SFRP1/SAMSN1/ADORA1/MMP28/PTPRC/PTGER4/EMILIN1/PGLYRP3/CTLA4/IL7R/HAVCR2/SLAMF8/GLI3/KIR2DL4/GPNMB/LILRB4/HOXB8/GPR55/TAFA3/IL12B/TIGIT/PTPN22/MNDA/STAP1/LAX1/IL2RA/BMP5/TNF/CD22/TGFB2/CYP19A1/ACOD1/TNFRSF1…	89	8.37398
BP	GO:0017001	antibiotic catabolic process	19/2423	58/18670	8.0262e-05	0.0012537	0.000919318	SULT1B1/ADH4/ADH7/MT3/PCK2/HP/HBD/HBM/ALDH2/SULT2A1/HBQ1/RENBP/DUOX1/SNCA/APOA4/SULT1C4/HBE1/ALDH3B2/DUOX2	19	-0.229416
BP	GO:1903169	regulation of calcium ion transmembrane transport	37/2423	151/18670	8.24032e-05	0.00128376	0.00094136	DRD1/IL13/CACNG1/STRIT1/KCNE2/RGN/JPH1/JPH3/CAV3/CBARP/PIK3CG/HAP1/CORO1A/TGFB1/CACNA2D1/CACNB3/CXCL9/ANK2/P2RY6/GEM/HPCA/SNCA/CACNB1/RRAD/CEMIP/G6PD/JSRP1/SLN/CD19/UBASH3B/STAC/DRD2/STAC2/CALCR/ADRA2A/TRDN/CRHR1	37	4.10997
BP	GO:0002686	negative regulation of leukocyte migration	17/2423	49/18670	8.39574e-05	0.00130188	0.000954654	CCL28/NBL1/APOD/GREM1/GPR18/PADI2/ADORA1/MMP28/PTGER4/EMILIN1/SLAMF8/STAP1/BMP5/CYP19A1/ABR/SLIT2/GCSAM	17	4.12311
BP	GO:0006821	chloride transport	29/2423	108/18670	8.40067e-05	0.00130188	0.000954654	SLC12A1/FXYD1/SLC4A1/CLCN1/GRM5/CLCA4/BEST1/GABRG1/P2RY6/PTAFR/P2RY4/CLCNKB/CLDN4/BEST3/ANO4/CLIC6/GABRA4/GABRA2/GABRR1/GABRP/CLIC3/ANO9/FXYD3/CLCA1/TTYH1/SLC26A9/PRKG2/CFTR/GABRA5	29	3.8996
BP	GO:0090103	cochlea morphogenesis	11/2423	24/18670	8.43808e-05	0.00130427	0.000956401	PTK7/TBX1/HOXA1/TIFAB/POU3F4/CTHRC1/GLI2/FZD2/EYA1/VANGL2/MYO3A	11	3.31662
BP	GO:0051209	release of sequestered calcium ion into cytosol	32/2423	124/18670	8.53641e-05	0.00131389	0.000963454	DRD1/IL13/HTR2B/JPH1/JPH3/TRPM2/FASLG/LCK/RASA3/HAP1/CORO1A/TGFB1/CCL19/CXCL9/CCR5/ANK2/PTPRC/P2RY6/CCR7/SNCA/RYR1/CEMIP/JSRP1/CD19/MCOLN2/UBASH3B/DRD2/MCOLN3/HTR2C/TRDN/ITPR3/TRPA1	32	4.59619
BP	GO:0042554	superoxide anion generation	14/2423	36/18670	8.5447e-05	0.00131389	0.000963454	TAFA4/ITGB2/TGFB1/CLEC7A/ITGAM/FPR2/NCF2/DUOX1/CYBB/SYK/NCF1/GSTP1/CD177/DUOX2	14	3.20713
BP	GO:1903825	organic acid transmembrane transport	34/2423	135/18670	8.81746e-05	0.00134882	0.000989071	SLC1A2/SLC16A11/SLC27A5/AQP9/SLC13A3/THRSP/SLC6A12/SLC13A5/SLC5A6/SLC25A15/SLC16A12/SLC7A8/SLC7A1/SLC38A1/SLC38A5/SLC17A8/EMB/SLC16A3/SLC6A8/SLC6A5/SLC7A7/SLC1A5/KCNJ10/RGS2/SLC6A19/RGS4/PDPN/SLC13A1/SLC6A6/FOLR1/SLC7A4/STRA6/SLC6A14/SLC6A15	34	2.05798
BP	GO:1905039	carboxylic acid transmembrane transport	34/2423	135/18670	8.81746e-05	0.00134882	0.000989071	SLC1A2/SLC16A11/SLC27A5/AQP9/SLC13A3/THRSP/SLC6A12/SLC13A5/SLC5A6/SLC25A15/SLC16A12/SLC7A8/SLC7A1/SLC38A1/SLC38A5/SLC17A8/EMB/SLC16A3/SLC6A8/SLC6A5/SLC7A7/SLC1A5/KCNJ10/RGS2/SLC6A19/RGS4/PDPN/SLC13A1/SLC6A6/FOLR1/SLC7A4/STRA6/SLC6A14/SLC6A15	34	2.05798
BP	GO:0035587	purinergic receptor signaling pathway	13/2423	32/18670	8.97939e-05	0.00136653	0.00100206	P2RX2/P2RX3/P2RX1/GPR171/P2RX5/ADCY5/ADORA1/P2RY6/PTAFR/ADORA2B/P2RY12/P2RY4/P2RY10	13	2.49615
BP	GO:0042573	retinoic acid metabolic process	13/2423	32/18670	8.97939e-05	0.00136653	0.00100206	CYP3A4/CYP1A1/UGT1A3/ADH1B/CYP2C8/ADH7/ADH1C/ADH6/ADH1A/UGT1A8/CRABP1/CYP26B1/CRABP2	13	-1.38675
BP	GO:0042634	regulation of hair cycle	12/2423	28/18670	9.00726e-05	0.00136726	0.00100259	DKK4/TERT/HPSE/TNF/TGFB2/WNT10B/GAL/CDH3/KRT17/MSX2/FOXN1/FA2H	12	2.3094
BP	GO:0050764	regulation of phagocytosis	27/2423	98/18670	9.05449e-05	0.00137091	0.00100527	ADIPOQ/C4BPA/C4BPB/TREM2/PIP4P2/RAB31/FGR/NCKAP1L/IL2RB/HCK/SIRPB1/TGFB1/CLEC7A/PTX3/DOCK2/IL2RG/FPR2/SIRPG/PTPRC/IFNG/SYK/STAP1/TNF/ABR/IL1B/PRKCG/SPHK1	27	4.04145
BP	GO:0002292	T cell differentiation involved in immune response	21/2423	68/18670	9.11667e-05	0.0013768	0.00100959	LGALS9/SLAMF6/CD86/IL12RB1/GATA3/CLEC4E/LY9/SPN/CCL19/IL2/MYB/GPR183/IL6/JAK3/PTGER4/IL18/IFNG/IL12B/SEMA4A/CD80/IRF4	21	4.58258
BP	GO:0035249	synaptic transmission, glutamatergic	26/2423	93/18670	9.30497e-05	0.00140167	0.00102782	DRD1/GLUL/TNR/P2RX1/GRM6/GRM5/NLGN3/GRM1/SLC17A8/ADORA1/OXTR/GRIN1/ROR2/PTGS2/SERPINE2/GRM3/UNC13C/DKK1/TNF/GRM4/DRD2/UNC13A/GRID2/GRIA2/NRXN1/NLGN1	26	3.92232
BP	GO:0061318	renal filtration cell differentiation	9/2423	17/18670	9.35692e-05	0.00140235	0.00102833	ADIPOQ/JAG1/PTPRO/IQGAP1/FOXC2/CD24/NPHS2/BASP1/PROM1	9	2.33333
BP	GO:0072112	glomerular visceral epithelial cell differentiation	9/2423	17/18670	9.35692e-05	0.00140235	0.00102833	ADIPOQ/JAG1/PTPRO/IQGAP1/FOXC2/CD24/NPHS2/BASP1/PROM1	9	2.33333
BP	GO:0032945	negative regulation of mononuclear cell proliferation	22/2423	73/18670	9.40974e-05	0.00140316	0.00102892	LGALS9/CD86/PDE5A/LILRB1/SPN/TNFRSF21/TGFB1/IL2/IL10/CTLA4/HAVCR2/GPNMB/MNDA/IL2RA/TNFRSF13B/CD80/GAL/SCGB1A1/SOX11/PLA2G2D/FOXJ1/VTCN1	22	4.69042
BP	GO:0050672	negative regulation of lymphocyte proliferation	22/2423	73/18670	9.40974e-05	0.00140316	0.00102892	LGALS9/CD86/PDE5A/LILRB1/SPN/TNFRSF21/TGFB1/IL2/IL10/CTLA4/HAVCR2/GPNMB/MNDA/IL2RA/TNFRSF13B/CD80/GAL/SCGB1A1/SOX11/PLA2G2D/FOXJ1/VTCN1	22	4.69042
BP	GO:1904645	response to amyloid-beta	18/2423	54/18670	9.51838e-05	0.0014158	0.00103819	IGF1/TREM2/GRM5/ITGA4/CACNA2D1/MMP3/FPR2/DNM1/IGF1R/CACNB1/CACNA1B/MMP2/MMP9/ATP1A3/CALCR/MMP13/CHRNA7/MMP12	18	3.77124
BP	GO:0042035	regulation of cytokine biosynthetic process	30/2423	114/18670	9.55521e-05	0.00141772	0.00103959	CD86/LILRB1/PRKCQ/GATA3/SPN/CD3E/CLEC7A/IL10/IL6/TNFRSF8/TLR7/PTPRC/IFNG/PTAFR/CYBB/SYK/IL1A/IL12B/IGF2BP3/TNFRSF13C/TNF/LTB/TLR8/IL1B/CD80/CARD11/INHA/IRF4/EREG/FOXJ1	30	5.47723
BP	GO:0097530	granulocyte migration	35/2423	141/18670	9.58912e-05	0.00141919	0.00104067	SAA1/CCL16/S100A9/VAV1/CCL11/NCKAP1L/ADAM8/PIK3CG/PIK3CD/ITGB2/CCL19/CXCL9/RAC2/PTGER4/CCR7/SLAMF8/S100A14/SYK/ADGRE2/CXCL3/CCL22/CSF3R/CXCL8/TGFB2/CCL26/SLIT2/IL1B/MCOLN2/CCL7/PF4V1/CD177/CXCL1/SCG2/CXCL6/CXCL5	35	5.23996
BP	GO:0051896	regulation of protein kinase B signaling	53/2423	244/18670	9.68969e-05	0.0014305	0.00104896	ESR1/EPGN/FGF19/CD86/VAV1/ADAM8/C1QTNF1/LCK/CAV3/PIK3CG/GATA3/PIK3CD/TGFB1/CCL19/AREG/FGF20/RAC2/FGF7/MEIS3/TRAT1/HPSE/IL18/TSPYL5/IGFBP5/CCR7/FGF1/P2RY12/OSM/ICOS/PDGFRA/IGF1R/PKHD1/TNF/F3/FGF10/CD80/CD19/HGF/FGFR1/ERBB4/MST1R/LEP/FGF4/FGF23/DRD2/TGFA/CALCR/NTRK2/LIN28A/BANK1/FGF5/EREG/SFRP5	53	7.00539
BP	GO:0001676	long-chain fatty acid metabolic process	29/2423	109/18670	0.000100455	0.00147934	0.00108478	CYP3A4/CYP1A2/CYP1A1/CYP2A13/CYP2E1/SLC27A5/CYP2B6/CYP2C9/CYP2A7/CYP2C8/CYP2A6/ACADL/ACSL6/ACSL5/CYP4A11/PTGS1/PLP1/ACOT11/PTGES/GLYATL2/PTGS2/ALOX12B/GSTP1/PTGIS/PLA2G4A/ALOX15B/PTGDS/ALOX5/ALOXE3	29	-0.185695
BP	GO:0001523	retinoid metabolic process	28/2423	104/18670	0.000105084	0.00154367	0.00113195	CYP3A4/CYP1A2/CYP1A1/UGT1A3/ADH1B/ADH4/CYP2C8/ADH7/ADH1C/APOC3/ADH6/RDH5/TTR/ADH1A/RDH16/AKR1B1/UGT1A8/RBP2/CRABP1/SDR16C5/APOA4/GPC4/CYP26B1/GPC2/CRABP2/LRP8/STRA6/CLPS	28	-0.377964
BP	GO:0060541	respiratory system development	45/2423	198/18670	0.000105442	0.00154509	0.00113299	RSPO2/CYP1A2/TBX4/ASCL1/LHX3/IL13/MME/HSD11B1/PTK7/TGFB3/TBX5/FGF7/ADAMTS2/IGFBP5/FGF1/GLI3/DLX5/HHIP/PDGFRA/PHEX/AARD/TNF/GLI1/FGF10/BASP1/MMP14/TNC/FGFR1/WNT2/MSC/PDPN/ABCA12/GLI2/NOG/SOX11/LIF/VANGL2/ITGA3/STRA6/LAMA1/NKX2-8/FOXJ1/GRHL2/AGR2/WNT7B	45	4.32306
BP	GO:0035637	multicellular organismal signaling	46/2423	204/18670	0.000108418	0.00158478	0.0011621	CACNA1I/DRD1/ACE2/DRD5/CTNNA3/CACNG1/FXYD1/P2RX3/CLCN1/KCNE2/TNR/ABCC9/KCNMB4/P2RX1/ATP2A3/DSG2/CACNA2D1/CACNB3/ANK2/SCN2B/NTRK3/CNTNAP1/FLNA/KCNE4/KCNIP1/RYR1/CACNB1/FXYD2/KCNK15/SCN7A/KCNH2/CHRNA1/SCN3B/CACNA1G/ANK3/ATP1A4/MTNR1B/ATP1A3/CACNG6/NTRK2/TRDN/KCND2/FXYD3/ITPR3/NKX2-5/HCN4	46	3.24372
BP	GO:0008016	regulation of heart contraction	54/2423	251/18670	0.000109119	0.00159109	0.00116672	ACE2/CTNNA3/CACNG1/ADRA1A/FXYD1/KCNE2/ABCC9/PDE5A/MYL2/CAV3/PIK3CG/MYH6/ATP2A3/DSG2/CACNA2D1/IL2/DES/CACNB3/ANK2/ADORA1/SCN2B/FLNA/KCNE4/CELF2/KCNIP1/APELA/RYR1/CACNB1/FXYD2/TNNI3/CACNA1B/KCNK15/TGFB2/MYH7/HSPB7/KCNH2/SCN3B/CACNA1G/RGS2/ATP1A4/RGS4/DRD2/SEMA3A/ATP1A3/CACNG6/TACR3/TRDN/KCND2/FXYD3/ITPR3/NKX2-5/TAC1/CHGA/HCN4	54	5.44331
BP	GO:0050922	negative regulation of chemotaxis	20/2423	64/18670	0.000110744	0.00161082	0.00118119	PLXNA3/NBL1/GREM1/SEMA6D/PTPRO/GPR18/PADI2/SEMA3D/MMP28/SEMA4D/SLAMF8/SEMA4A/STAP1/CYP19A1/GSTP1/SLIT2/SEMA6A/SEMA3A/SEMA3E/SEMA3C	20	4.47214
BP	GO:0019933	cAMP-mediated signaling	43/2423	187/18670	0.000112179	0.0016277	0.00119357	DRD1/ADCY8/DRD5/PDE11A/ADRA1A/LGR5/GCGR/TCP11/PDE4A/PTGFR/ADGRG1/ADCY2/ADGRE5/CXCL9/MC4R/ADCY5/PDE10A/PTGER4/ADGRE1/GPR161/CGAS/ADORA2B/ADGRE3/ADGRE2/ADGRB1/UCN3/APLP1/ADGRB2/GAL/RGS2/ADGRB3/PTHLH/DRD2/SCTR/GPR78/PCLO/LPAR1/CALCR/ADRA2A/CRHR1/GIPR/EPHA5/CHGA	43	4.11746
BP	GO:0006022	aminoglycan metabolic process	40/2423	170/18670	0.000113173	0.0016381	0.0012012	UST/CSGALNACT1/DCN/OGN/TGFB1/CHIA/HS3ST5/CHST1/XYLT1/B3GNT9/HPSE/PGLYRP3/OMD/B3GNT8/PRELP/CHST6/CHST11/ITIH6/HS3ST1/CHST3/ACAN/GPC4/CEMIP/HS6ST2/B3GNT7/IL1B/HAS1/GPC2/HGF/FMOD/B3GNT3/LUM/HAS2/CHST5/CHIT1/VCAN/PGLYRP4/GALNT5/HS3ST6/ITIH5	40	6.00833
BP	GO:0071300	cellular response to retinoic acid	21/2423	69/18670	0.000115194	0.00166067	0.00121775	PTK7/LTK/TEAD2/TBX1/HOXA2/AQP1/MYB/NTRK3/TESC/EPHA3/CYP26B1/TNC/WNT10B/FZD7/GJB3/COL1A1/LEP/RORB/WNT2/WNT9A/WNT7B	21	4.58258
BP	GO:1902656	calcium ion import into cytosol	8/2423	14/18670	0.000115293	0.00166067	0.00121775	TRPM2/CACNA2D1/FAM155A/FAM155B/MS4A1/TRPV5/CALCR/TRPV6	8	2.82843
BP	GO:0030104	water homeostasis	22/2423	74/18670	0.000117677	0.00169089	0.0012399	CYP11B2/ACER1/ADCY8/AQP9/CYP4A11/AKR1B1/AQP1/ADCY2/ADCY5/ATP6V1B1/ALOX12B/CLDN4/CYP26B1/HAS2/TFAP2B/ABCA12/SCTR/KRT16/ALOXE3/CFTR/BPIFA1/FA2H	22	2.55841
BP	GO:0051283	negative regulation of sequestering of calcium ion	32/2423	126/18670	0.000118379	0.00169325	0.00124164	DRD1/IL13/HTR2B/JPH1/JPH3/TRPM2/FASLG/LCK/RASA3/HAP1/CORO1A/TGFB1/CCL19/CXCL9/CCR5/ANK2/PTPRC/P2RY6/CCR7/SNCA/RYR1/CEMIP/JSRP1/CD19/MCOLN2/UBASH3B/DRD2/MCOLN3/HTR2C/TRDN/ITPR3/TRPA1	32	4.59619
BP	GO:0003151	outflow tract morphogenesis	23/2423	79/18670	0.000118438	0.00169325	0.00124164	TBX3/JAG1/TBX1/TBX20/FOXC2/TWIST1/RYR1/TGFB2/FZD1/SFRP2/NOG/FZD2/FOLR1/SOX11/MSX2/NPY5R/ISL1/HAND2/EYA1/NKX2-5/SEMA3C/BMP7/PITX2	23	4.3788
BP	GO:0050866	negative regulation of cell activation	45/2423	199/18670	0.000119412	0.00169325	0.00124164	LGALS9/CD86/CNR2/IL13RA2/PDE5A/LILRB1/C1QTNF1/CD84/SPN/TNFRSF21/TGFB1/IL2/IL10/JAK3/SFRP1/SAMSN1/PTPRC/EMILIN1/PGLYRP3/CTLA4/HAVCR2/GLI3/GPNMB/TAFA3/SERPINE2/TIGIT/PTPN22/PDGFRA/MNDA/LAX1/IL2RA/TNFRSF13B/ABR/CD80/INHA/GAL/TYRO3/UBASH3B/SCGB1A1/SOX11/PGLYRP4/PLA2G2D/BANK1/FOXJ1/VTCN1	45	6.7082
BP	GO:0035590	purinergic nucleotide receptor signaling pathway	10/2423	21/18670	0.000119843	0.00169325	0.00124164	P2RX2/P2RX3/P2RX1/GPR171/P2RX5/P2RY6/PTAFR/P2RY12/P2RY4/P2RY10	10	1.89737
BP	GO:0042403	thyroid hormone metabolic process	10/2423	21/18670	0.000119843	0.00169325	0.00124164	TG/SULT1B1/CGA/GATA3/DUOX1/SLC5A5/FOXE1/DUOXA1/DUOXA2/DUOX2	10	1.26491
BP	GO:0048485	sympathetic nervous system development	10/2423	21/18670	0.000119843	0.00169325	0.00124164	ASCL1/GDNF/GATA3/SOX4/TFAP2B/SOX11/INSM1/HAND2/SEMA3A/GFRA3	10	1.89737
BP	GO:0072010	glomerular epithelium development	10/2423	21/18670	0.000119843	0.00169325	0.00124164	ADIPOQ/JAG1/PTPRO/IQGAP1/FOXC2/CD24/NPHS2/BASP1/FOXJ1/PROM1	10	2.52982
BP	GO:0043029	T cell homeostasis	14/2423	37/18670	0.000121137	0.00170746	0.00125205	RAG1/RIPK3/LGALS9/NCKAP1L/LMO1/CORO1A/TGFB1/SIT1/IL2/JAK3/GPR174/IL2RA/FOXN1/PMAIP1	14	3.20713
BP	GO:0045060	negative thymic T cell selection	7/2423	11/18670	0.000125756	0.0017563	0.00128787	ZAP70/CD3E/DOCK2/PTPRC/CCR7/GLI3/AIRE	7	2.64575
BP	GO:0061307	cardiac neural crest cell differentiation involved in heart development	7/2423	11/18670	0.000125756	0.0017563	0.00128787	JAG1/TWIST1/FOLR1/HAND2/SEMA3C/BMP7/PITX2	7	2.64575
BP	GO:0061308	cardiac neural crest cell development involved in heart development	7/2423	11/18670	0.000125756	0.0017563	0.00128787	JAG1/TWIST1/FOLR1/HAND2/SEMA3C/BMP7/PITX2	7	2.64575
BP	GO:0002708	positive regulation of lymphocyte mediated immunity	28/2423	105/18670	0.000125789	0.0017563	0.00128787	HPX/SLAMF6/VAV1/LTA/IL12RB1/IL12A/CD1C/SASH3/GATA3/ULBP2/TGFB1/IL2/ULBP3/SH2D1A/IL6/RASGRP1/PTPRC/IL18/CRTAM/KIR2DL4/IL12B/CD1E/TNF/IL1B/ULBP1/CD1B/RAET1L/CD1A	28	4.91354
BP	GO:0001504	neurotransmitter uptake	16/2423	46/18670	0.000130318	0.00180542	0.00132389	DRD1/SLC6A2/SLC1A2/GLUL/GDNF/SLC18A1/SLC38A1/SLC6A3/SLC6A5/SNCA/KCNJ10/RGS2/RGS4/SNAP25/SYNGR3/DRD2	16	1.5
BP	GO:0043300	regulation of leukocyte degranulation	16/2423	46/18670	0.000130318	0.00180542	0.00132389	IL13/LGALS9/IL13RA2/FGR/CD84/ITGB2/RAC2/ITGAM/PTAFR/ADORA2B/SYK/ADGRE2/ABR/UNC13D/CD177/CRHR1	16	3.5
BP	GO:0010092	specification of animal organ identity	13/2423	33/18670	0.000130646	0.00180542	0.00132389	AR/GDNF/TBR1/SMARCD3/FGF1/GLI3/HOXA11/DKK1/FGF10/FGFR1/HOXC11/WNT2/ISL1	13	2.49615
BP	GO:0032633	interleukin-4 production	13/2423	33/18670	0.000130646	0.00180542	0.00132389	LGALS9/CD86/CLECL1/PRKCQ/SASH3/GATA3/ITK/CD3E/HAVCR2/SYK/SCGB1A1/IRF4/VTCN1	13	3.60555
BP	GO:0052548	regulation of endopeptidase activity	82/2423	425/18670	0.000130832	0.00180542	0.00132389	SMR3A/SMR3B/OPRPN/CSN2/COL7A1/SERPINC1/MT3/RAG1/LPA/WFDC5/POR/FETUB/CARD17/LGALS9/TNFAIP8/S100A9/FASLG/BIRC3/LCK/P2RX1/CRB2/SOX2/EPHA7/CRYAB/SPINK4/AQP1/CLEC7A/SERPINI2/PI3/LXN/RENBP/CR1/COL28A1/ST18/SERPINB5/CST2/MICAL1/SYK/GRIN1/TFPI2/PTGS2/SERPINE2/SNCA/ITIH6/NLRP7/CD27/COL6A3/FOXL2/ANOS1/TNF/F3/TIMP2/GRIN2A/KHDC1L/DPEP1/HGF/PCSK1N/CASP5/LCN1/PLAUR/TFAP2B/ANXA8/SFRP2/EGLN3/MMP9/AIM2/CST6/PAPLN…	82	6.40503
BP	GO:0002507	tolerance induction	11/2423	25/18670	0.000133057	0.00183185	0.00134327	LGALS9/CD3E/TGFB1/CCR4/HAVCR2/ICOS/IL2RA/ACOD1/AIRE/PDCD1/FOXJ1	11	3.31662
BP	GO:0071280	cellular response to copper ion	12/2423	29/18670	0.00013558	0.0018614	0.00136494	MT1B/CYP1A2/CYP1A1/MT1X/MT1M/MT2A/MT1G/MT3/MT1E/MT1H/AQP1/SNCA	12	-2.3094
BP	GO:0003007	heart morphogenesis	55/2423	259/18670	0.000135832	0.0018614	0.00136494	TBX3/TMEM100/HTR2B/SLIT3/JAG1/TBX5/MYL2/TEAD2/CAV3/TBX1/GATA3/MYH6/TGFB1/SMARCD3/TBX20/FOXC2/ANKRD1/TWIST1/RYR1/TNNI3/BMP5/DKK1/TGFB2/MYH7/COL5A1/SLIT2/FZD1/SOX4/HAS2/OLFM1/WNT2/FLRT2/LEFTY1/SFRP2/MYBPC2/NOG/FZD2/FOLR1/SOX11/MSX2/NPY5R/SHOX2/ISL1/HAND2/EYA1/XIRP2/VANGL2/OVOL2/NKX2-5/SEMA3C/BMP7/LBX1/PITX2/COL11A1/GRHL2	55	6.60716
BP	GO:0042100	B cell proliferation	26/2423	95/18670	0.000136552	0.00186264	0.00136585	IL13/NCKAP1L/SASH3/CD70/TNFRSF21/IKZF3/TNFSF13B/IL2/IL10/GPR183/FCRL3/PTPRC/CTLA4/IL7R/CD38/MNDA/TNFRSF13C/CD22/TNFRSF13B/CARD11/MS4A1/CD19/GAPT/MZB1/CD79A/CR2	26	4.70679
BP	GO:0051952	regulation of amine transport	26/2423	95/18670	0.000136552	0.00186264	0.00136585	DRD1/ACE2/SYT9/KCNB1/CHRNA4/GDNF/SNCG/FGF20/SYT3/ADORA1/OXTR/P2RY12/SV2A/SNCA/CHRNA6/RGS2/RGS4/SYT4/LEP/DRD2/NPY5R/ADRA2A/CRHR1/SYT8/CHGA/SYT13	26	2.74563
BP	GO:0010717	regulation of epithelial to mesenchymal transition	25/2423	90/18670	0.000140857	0.00191696	0.00140568	JAG1/TGFB3/TBX5/GREM1/CRB2/GLIPR2/TGFB1/IL6/SFRP1/PHLDB1/TWIST1/BMP5/TGFB2/EPHA3/IL1B/OLFM1/COL1A1/PDPN/SFRP2/NOG/ISL1/OVOL2/SERPINB3/ALX1/BMP7	25	5
BP	GO:0014031	mesenchymal cell development	24/2423	85/18670	0.000144121	0.00195239	0.00143166	HTR2B/GDNF/FGF19/JAG1/TBX1/SEMA6D/SEMA3D/FOXC2/SEMA4D/SEMA4A/TWIST1/ERBB4/SEMA6A/FOLR1/SOX11/ISL1/HAND2/SEMA3A/OVOL2/SEMA3E/ALX1/SEMA3C/BMP7/PITX2	24	4.08248
BP	GO:0034308	primary alcohol metabolic process	24/2423	85/18670	0.000144121	0.00195239	0.00143166	CYP11B2/CYP3A4/CYP1A2/CYP1A1/ADH1B/SULT1B1/ADH4/ADH7/ADH1C/ADH6/IGF1/RDH5/TTR/ALDH2/ADH1A/HAO1/RDH16/SULT2A1/AKR1B1/ACSS1/SDR16C5/BMP5/SULT1C4/ALDH3B2	24	-2.44949
BP	GO:0002697	regulation of immune effector process	87/2423	458/18670	0.00014512	0.00196145	0.0014383	IL13/CFHR4/C8A/CFHR5/C6/C4BPA/CFHR2/HPX/C4BPB/RIPK3/LGALS9/SLAMF6/CD86/KLK7/VAV1/LTA/IL13RA2/FGR/LILRB1/BIRC3/TGFB3/FFAR2/IL12RB1/IL12A/CD1C/SASH3/CD84/GATA3/TRIM6/ULBP2/ITGB2/TGFB1/CCL19/IL2/ULBP3/SH2D1A/MYB/IL10/RAC2/FCRL3/IL6/ITGAM/JAK3/CR1/RASGRP1/PTPRC/PGLYRP3/IL18/CRTAM/IL7R/HAVCR2/IFNG/PTAFR/SLAMF8/CGAS/KIR2DL4/ADORA2B/SYK/IL12B/ADGRE2/CR1L/IL2RA/CD1E/TNF/CD22/TGFB2/ABR/IL1B/CD80/CD19/ULBP…	87	7.39758
BP	GO:0032535	regulation of cellular component size	73/2423	370/18670	0.000147763	0.00199262	0.00146116	SLC12A1/ACTN2/CTNNA2/MT3/LMOD2/TNR/RHOBTB1/COTL1/SH3BP1/CARMIL1/VAV1/SPIRE1/PLXNA3/CCL11/NCKAP1L/NEB/CAV3/BAIAP2L2/EPHA7/HCK/LIMK1/ISLR2/PLEK/CORO1A/SEMA6D/ADD2/RAP1GAP2/SPTB/NCK2/CAPG/AQP1/SEMA3D/KIRREL1/MAGEL2/BDNF/TRIM46/PFN2/KEL/CARMIL2/NTRK3/SEMA4D/IL7R/CCR7/KCNN4/ARHGAP28/SEMA4A/FMN1/GNB3/NKX6-1/SPP1/CCL26/SLIT2/DBN1/SCIN/SPTA1/OLFM1/CRABP2/TMSB15B/CRACD/SEMA6A/PLEKHH2/L1CAM/SCTR/FHOD3/SEMA…	73	6.90543
BP	GO:0052547	regulation of peptidase activity	86/2423	452/18670	0.00014924	0.00200796	0.00147241	SMR3A/SMR3B/OPRPN/CSN2/COL7A1/SERPINC1/MT3/RAG1/LPA/WFDC5/POR/FETUB/CARD17/PI16/LGALS9/TNFAIP8/S100A9/FASLG/BIRC3/LCK/P2RX1/CRB2/SOX2/EPHA7/CRYAB/SPINK4/AQP1/CLEC7A/SERPINI2/PI3/LXN/RENBP/WFDC10B/CR1/COL28A1/ST18/SERPINB5/CST2/MICAL1/SYK/GRIN1/FBLN1/ANTXR1/TFPI2/PTGS2/SERPINE2/SNCA/ITIH6/NLRP7/CD27/COL6A3/FOXL2/ANOS1/TNF/F3/TIMP2/GRIN2A/KHDC1L/DPEP1/HGF/PCSK1N/CASP5/LCN1/PLAUR/TFAP2B/ANXA8/SFRP2/…	86	6.68563
BP	GO:0010038	response to metal ion	72/2423	364/18670	0.000150727	0.00202337	0.00148371	CYP11B2/MT1B/CYP1A2/ACER1/CYP1A1/ASCL1/MT1X/ADCY8/AQP9/FABP4/SYT9/MT1M/TAT/MT2A/MT1G/MT3/MT1E/GPLD1/MT1H/SORD/SLC30A2/PPARGC1A/HAAO/CPS1/TERT/CRIP1/PDX1/TRPM2/KCNMB4/ECT2/AANAT/TNFRSF11B/CPNE4/IQGAP1/AQP1/KRT14/SYT3/TRPC3/SOD3/PTGES/CYBB/HPCA/PENK/IL1A/PTGS2/SLC6A3/SNCA/RYR1/FIBIN/NCF1/ALOX5AP/G6PD/SLC25A24/SNCB/DPEP1/CACNA1G/TFAP2A/ANK3/SYT4/RASAL1/FGF23/MMP9/DRD2/APOBEC1/NLGN1/ITPR3/GIPR/TRPV6/…	72	2.59272
BP	GO:0060537	muscle tissue development	79/2423	408/18670	0.000152871	0.0020475	0.00150141	ACTN2/TBX3/P2RX2/HLF/ADRA1A/IGF1/PPARGC1A/PGM5/PI16/ANKRD2/NIBAN2/DCN/NEB/KLF5/TBX5/MYL2/EGR2/GREM1/CAV3/TBX1/MYH6/TGFB1/DSG2/TBX20/FOXC2/FGF20/KEL/IGFBP5/POPDC3/NEBL/ANKRD1/ASB2/TWIST1/SGCG/PDGFRA/RYR1/PITX1/ANKRD33/FOXL2/G6PD/TNNI3/BMP5/S100B/DKK1/HDAC9/TGFB2/GLI1/MYH7/CYP26B1/CHRNA1/MYH15/WNT10B/FGFR1/RGS2/FZD7/ERBB4/RGS4/COL3A1/WNT2/MSC/MYBPC2/NOG/SOX11/TENM4/SHOX2/ISL1/VAX1/FHOD3/CHRND/EYA1/…	79	7.08805
BP	GO:0009913	epidermal cell differentiation	71/2423	358/18670	0.000153654	0.00205334	0.00150568	REG3A/ACER1/KRTAP10-6/EXPH5/DSG1/CLRN1/LCE2D/USH2A/MYCL/JAG1/PDZD7/KRTAP5-1/KRT2/PKP1/DSG2/PI3/KRT14/KRTAP5-5/KRT23/SLC44A4/CTSK/KRT9/KRT36/SPRR1A/BCL11B/KRT78/KRT5/KRT15/SLITRK6/KRT6B/SPRR3/GLI1/CYP26B1/ATOH1/KLK13/EVPL/SFRP4/FGFR1/REG3G/TGM5/SCEL/KRT13/CDH3/SPRR1B/ABCA12/ALOX15B/KRT7/KRT40/KRT28/KRT75/KRT17/MSX2/KRTAP4-1/MCOLN3/DSC3/KRT79/FOXN1/KRT16/KRT83/KRTAP1-1/KRT4/OVOL2/KRT20/PITX2/KRT80/…	71	6.28994
BP	GO:0050777	negative regulation of immune response	36/2423	150/18670	0.000159814	0.00213086	0.00156253	NLRP6/C4BPA/C4BPB/LGALS9/IL13RA2/LILRB1/TGFB3/CD84/TGFB1/IL2/IL10/JAK3/CR1/SAMSN1/PTPRC/PGLYRP3/CTLA4/IL7R/HAVCR2/SLAMF8/KIR2DL4/IL12B/IL2RA/TNF/TGFB2/ACOD1/ABR/TYRO3/COL3A1/PDCD1/DRD2/NPY5R/PGLYRP4/SERPINB4/FOXJ1/MMP12	36	5
BP	GO:0048880	sensory system development	73/2423	371/18670	0.000161063	0.00214268	0.0015712	CYP1A1/NKD1/USH2A/MIP/COL8A1/JAG1/FASLG/MAB21L2/CABP4/SOX2/GRM6/GATA3/CRYAB/NHS/TGFB1/CRYGN/SMARCD3/FOXC2/CELF4/ITGAM/SLC17A8/FSCN2/TENM3/VAX2/EFEMP1/NTRK3/PITX3/SLC44A4/GLI3/HPCA/CALB1/P2RY12/BCL11B/MITF/TWIST1/PDGFRA/SLITRK6/FOXL2/HCN1/TGFB2/MAB21L1/FGF10/COL5A1/CHRDL1/MYH15/PTF1A/TFAP2A/TFAP2B/MTNR1B/FOXF2/RORB/COL8A2/WNT2/SOX11/FBN2/ISL1/VAX1/SEMA3A/MFAP2/WNT9A/BMPR1B/NTRK2/LHX1/ATP8A2/NDP/ST…	73	7.60767
BP	GO:0048871	multicellular organismal homeostasis	91/2423	485/18670	0.000162039	0.00215082	0.00157717	CYP11B2/ACER1/DRD1/OPRPN/ADCY8/CIDEA/IL13/AZGP1/FABP4/CLRN1/PDK4/ACADL/LEPR/ADIPOQ/USH2A/GADD45G/PPARGC1A/CYP4A11/AKR1B1/FFAR4/TRPM2/ADAM8/SASH3/TNFRSF11B/CORO1A/AQP1/FABP5/FOXC2/ADCY2/UCP1/ACOT11/RAC2/MC4R/IL6/ADCY5/AMPD3/ADORA1/IL18/ATP6V1B1/LRRK1/OXTR/CTSK/SYK/IL1A/GPR55/PTGS2/CD38/TNFRSF11A/IGF1R/KSR2/SPP1/ALOX12B/CLDN4/INAVA/TNF/IL1B/USH1G/PLAC8/CYP26B1/SLN/WNT10B/LCN1/HAS2/TFAP2B/PIWIL4/UBA…	91	5.76557
BP	GO:0051282	regulation of sequestering of calcium ion	32/2423	128/18670	0.000162438	0.0021513	0.00157752	DRD1/IL13/HTR2B/JPH1/JPH3/TRPM2/FASLG/LCK/RASA3/HAP1/CORO1A/TGFB1/CCL19/CXCL9/CCR5/ANK2/PTPRC/P2RY6/CCR7/SNCA/RYR1/CEMIP/JSRP1/CD19/MCOLN2/UBASH3B/DRD2/MCOLN3/HTR2C/TRDN/ITPR3/TRPA1	32	4.59619
BP	GO:0009312	oligosaccharide biosynthetic process	9/2423	18/18670	0.000165591	0.00218329	0.00160098	B3GALT1/B3GALNT1/ST6GALNAC1/FUT8/SLC2A1/FUT3/ST6GALNAC5/B3GALT2/B3GALT5	9	2.33333
BP	GO:0060192	negative regulation of lipase activity	9/2423	18/18670	0.000165591	0.00218329	0.00160098	APOC3/APOC1/POR/BICD1/HDAC9/PLA2R1/RGS2/ANXA8/ANXA8L1	9	1
BP	GO:0002685	regulation of leukocyte migration	44/2423	196/18670	0.000168179	0.00221249	0.00162239	VEGFD/RIPK3/TREM2/CCR6/LGALS9/CCL28/NCKAP1L/ADAM8/NBL1/APOD/GREM1/IL12A/ITGA4/CXCR3/SPN/GPR18/TGFB1/CCL19/PADI2/TNFRSF18/RAC2/IL6/FPR2/ADORA1/MMP28/PTGER4/EMILIN1/CCR7/PTAFR/SLAMF8/S100A14/P2RY12/STAP1/BMP5/CXCL8/TNF/CYP19A1/ABR/SLIT2/MMP14/GCSAM/AIRE/CCL7/CXCL14	44	6.33174
BP	GO:1902742	apoptotic process involved in development	14/2423	38/18670	0.000169046	0.00221896	0.00162713	SLIT3/HNF1B/SPI1/CRYAB/FOXC2/TGFB2/SLIT2/XKR6/FGF4/XKR4/HAND2/NKX2-5/BMP7/SIX3	14	3.74166
BP	GO:0030888	regulation of B cell proliferation	19/2423	61/18670	0.000171196	0.00224221	0.00164418	IL13/NCKAP1L/SASH3/TNFRSF21/IKZF3/TNFSF13B/IL2/IL10/GPR183/FCRL3/PTPRC/CTLA4/CD38/MNDA/TNFRSF13C/CD22/TNFRSF13B/CARD11/MZB1	19	3.90007
BP	GO:0060986	endocrine hormone secretion	16/2423	47/18670	0.000173976	0.00227298	0.00166674	C1QTNF3/REN/TBX3/NIBAN2/C1QTNF1/GATA3/RETN/FOXL2/IL1B/INHA/FGFR1/GAL/LEP/FOXD1/TAC1/CRHR1	16	2.5
BP	GO:0042089	cytokine biosynthetic process	31/2423	123/18670	0.000174313	0.00227298	0.00166674	CD86/LILRB1/PRKCQ/GATA3/SPN/CD3E/CLEC7A/IL10/IL6/TNFRSF8/TLR7/PTPRC/IL18/IFNG/PTAFR/CYBB/SYK/IL1A/IL12B/IGF2BP3/TNFRSF13C/TNF/LTB/TLR8/IL1B/CD80/CARD11/INHA/IRF4/EREG/FOXJ1	31	5.56776
BP	GO:0060047	heart contraction	58/2423	280/18670	0.00018316	0.00238309	0.00174749	ACE2/CTNNA3/KCNJ8/CACNG1/ADRA1A/FXYD1/KCNE2/ABCC9/PDE5A/MYL2/CAV3/PIK3CG/MYH6/TNNI2/ATP2A3/DSG2/CACNA2D1/IL2/DES/CACNB3/ANK2/ADORA1/SCN2B/FLNA/KCNE4/CELF2/SGCG/KCNIP1/APELA/RYR1/CACNB1/FXYD2/TNNI3/CACNA1B/KCNK15/TGFB2/MYH7/HSPB7/KCNH2/SCN3B/CACNA1G/RGS2/ATP1A4/RGS4/DRD2/SEMA3A/ATP1A3/CACNG6/TACR3/TRDN/KCND2/FXYD3/ITPR3/NKX2-5/TAC1/TNNT1/CHGA/HCN4	58	5.51487
BP	GO:0016999	antibiotic metabolic process	36/2423	151/18670	0.000184047	0.00238939	0.0017521	CYP1A2/CYP1A1/ADH1B/SULT1B1/ADH4/ADH7/MT3/PCK2/ADH1C/ADH6/HP/UROC1/HBD/HBM/ALDH2/ADH1A/AMDHD1/SULT2A1/AKR1B1/ACSS1/HBQ1/MMP3/RENBP/RAC2/DUOX1/CYBB/SNCA/APOA4/ACOD1/SULT1C4/DPEP1/HBE1/DUOXA1/DUOXA2/ALDH3B2/DUOX2	36	0
BP	GO:0032660	regulation of interleukin-17 production	13/2423	34/18670	0.00018654	0.00241644	0.00177194	SLAMF6/NCKAP1L/PRKCQ/IL12A/LY9/TGFB1/IL2/IL6/IL18/IFNG/IL12B/OSM/SPHK1	13	3.60555
BP	GO:0070371	ERK1 and ERK2 cascade	64/2423	317/18670	0.000188993	0.00244287	0.00179133	MT3/ADRA1A/NLRP6/HTR2B/ADIPOQ/IGF1/CCL16/TREM2/SPRED1/LGALS9/FGF19/FFAR4/CCL11/GLIPR2/EPHA7/TGFB1/CCL19/FGF20/GPR183/RASGRP1/FPR2/PTPRC/PTGER4/P2RY6/EMILIN1/HAVCR2/CCR7/DUSP26/MARCO/OXTR/GPNMB/SYK/GPR55/FBLN1/PTPN22/PDGFRA/TNFRSF11A/APELA/CCL22/PKHD1/TNF/CCL26/FGF10/GSTP1/IL1B/CHRNA9/DUSP4/ERBB4/CCL7/SEMA6A/FGF4/FGF23/ALKAL2/DRD2/NPY5R/ARHGAP8/C1QL4/HAND2/LIF/CALCR/WNK2/HTR2C/ALKAL1/CHRNA7	64	6.25
BP	GO:0034754	cellular hormone metabolic process	32/2423	129/18670	0.000189551	0.00244475	0.0017927	CYP11B2/CYP3A4/CYP1A2/CYP1A1/ESR1/UGT1A3/ADH1B/CYP2C9/ADH4/SRD5A2/CYP2C8/ADH7/UGT2B7/ADH1C/ADH6/RDH5/PPARGC1A/TTR/HSD17B6/ADH1A/RDH16/AKR1B1/AANAT/UGT1A8/CRABP1/PDGFRA/SDR16C5/SPP1/BMP5/CYP19A1/CYP26B1/CRABP2	32	-1.76777
BP	GO:0015872	dopamine transport	17/2423	52/18670	0.000193287	0.00248752	0.00182406	DRD1/SLC6A2/SYT9/SLC22A1/CHRNA4/GDNF/SNCG/FGF20/SYT3/SLC6A3/SNCA/CHRNA6/SYT4/DRD2/MAPK15/SYT8/SYT13	17	1.21268
BP	GO:0051146	striated muscle cell differentiation	60/2423	293/18670	0.000198537	0.00253714	0.00186045	ACTN2/MYH3/TBX3/P2RX2/ADRA1A/IGF1/LMOD2/PGM5/PI16/ANKRD2/NIBAN2/NEB/KLF5/TBX5/MYL2/GREM1/CAV3/TBX1/MYH6/TGFB1/CD53/MYEF2/BDNF/CXCL9/KEL/IGFBP5/POPDC3/NEBL/ANKRD1/PDGFRA/MYOF/RYR1/TRIM72/ADGRB1/G6PD/DKK1/HDAC9/CYP26B1/MMP14/WNT1/WNT10B/RGS2/FZD7/ADAM12/RGS4/ADGRB3/BHLHE41/TMEM119/MYBPC2/SHOX2/FHOD3/MYOD1/COMP/CEACAM5/NKX2-5/TNNT1/DNER/BARX2/KRT19/UCHL1	60	5.68038
BP	GO:0071466	cellular response to xenobiotic stimulus	41/2423	180/18670	0.000198544	0.00253714	0.00186045	CYP3A4/CYP1A2/CYP1A1/GSTM1/ALDH3A1/CYP2A13/CYP2E1/ADCY8/UGT1A3/CYP2B6/GLYAT/SULT1B1/CYP2C9/CYP2A7/CYP2C8/CYP2A6/UGT1A4/PCK2/ACSM2B/FMO3/CES2/BAAT/NAT2/PPARGC1A/POR/CDO1/NR1I2/CES3/APOBEC3A/PTGS1/UGT1A8/AQP1/TGFB1/UGT1A5/GRIN1/RYR1/GSTP1/CYP26B1/DPEP1/ARNT2/UGT1A10	41	-2.34261
BP	GO:0048640	negative regulation of developmental growth	29/2423	113/18670	0.000198974	0.00253714	0.00186045	NKD1/MT3/TNR/PI16/PLXNA3/TBX5/CAV3/EPHA7/STC2/SEMA6D/SEMA3D/TRIM46/SFRP1/SEMA4D/SEMA4A/BCL11A/SPP1/G6PD/PLAC8/GAL/RGS2/RGS4/SEMA6A/SFRP2/NOG/SEMA3A/KCNK2/SEMA3E/SEMA3C	29	4.27099
BP	GO:0032743	positive regulation of interleukin-2 production	12/2423	30/18670	0.000199414	0.00253714	0.00186045	CD86/PRKCQ/SASH3/CD3E/CLEC7A/PTPRC/IL1A/IL1B/CD80/CARD11/IRF4/VTCN1	12	3.4641
BP	GO:1905606	regulation of presynapse assembly	12/2423	30/18670	0.000199414	0.00253714	0.00186045	SLITRK2/NTRK3/SNCA/NTNG2/GPC4/LRFN4/DKK1/FZD1/CBLN2/NRXN1/SLITRK1/NLGN1	12	3.4641
BP	GO:0010810	regulation of cell-substrate adhesion	47/2423	215/18670	0.000199714	0.00253714	0.00186045	ECM2/PLG/COL8A1/CARMIL1/SMOC2/JAG1/CCL28/APOD/PTPRO/ABI3BP/IQGAP1/CD3E/NEXMIF/EGFL6/LIMCH1/RAC2/EDIL3/FBLN2/EMILIN2/SFRP1/EMILIN1/CCR7/FLNA/FBLN1/FMN1/MELTF/EPHA3/CCDC80/MMP14/WNT1/UNC13D/AJAP1/FZD7/HAS2/COL1A1/COL16A1/PDPN/TACSTD2/DDR1/POSTN/ITGA3/SEMA3E/EFNA5/MMP12/OLFM4/CEACAM6/AGR2	47	6.27219
BP	GO:0007188	adenylate cyclase-modulating G protein-coupled receptor signaling pathway	48/2423	221/18670	0.00020198	0.00255817	0.00187587	DRD1/ADCY8/DRD5/ADRA1A/LGR5/GCGR/GNA15/GRM6/PTGFR/ADGRG1/ADCY2/ADGRE5/CXCL9/MC4R/ADCY5/FPR1/FPR2/ADORA1/PTGER4/ADGRE1/GPR161/MARCO/ADORA2B/FLNA/P2RY12/ADGRE3/ADGRE2/GRM3/ADGRB1/UCN3/INSL3/GLP2R/GRM4/APLP1/ADGRB2/RGS2/RGS1/ADGRB3/GABBR1/PTHLH/DRD2/GPR78/LPAR1/PSAPL1/CALCR/ADRA2A/CRHR1/CHGA	48	5.19615
BP	GO:0031214	biomineral tissue development	38/2423	163/18670	0.00020269	0.00255817	0.00187587	KLK4/RSPO2/ODAM/AMBN/IGF1/FGR/TGFB3/GREM1/MGP/TBX1/ODAPH/IBSP/TGFB1/OMD/GPNMB/ROR2/PTGS2/TWIST1/PHEX/SPP1/WNT10B/TFAP2A/COL1A2/COL1A1/LEP/TMEM119/RFLNA/FGF23/PTHLH/MSX2/CER1/FBN2/AMTN/BMPR1B/COMP/MMP13/BMP7/NELL1	38	4.5422
BP	GO:1904951	positive regulation of establishment of protein localization	86/2423	456/18670	0.000202754	0.00255817	0.00187587	C1QTNF3/GCK/ADCY8/GLUL/IL13/EXPH5/SAA1/GPLD1/KCNB1/HTR2B/ANG/IGF1/TREM2/LGALS9/PANX3/PDX1/GZMB/FGR/PYDC1/ADAM8/TGFB3/FFAR2/ECT2/CD2/GATA3/TRIM6/CLEC4E/GTSE1/ITGB2/TGFB1/CCL19/IL2/CACNB3/CHIA/IL10/RAC2/IL6/ITGAM/RASGRP1/MMP8/ANXA13/PTGER4/CRTAM/HAVCR2/IFNG/KCNN4/ANKRD1/GLI3/HPCA/FLNA/SYK/IL1A/PTGS2/OSM/CD38/TWIST1/PTPN22/NLRP7/NKX6-1/CEMIP/UCN3/TNF/TGFB2/TLR8/IL1B/ANK3/SOX4/MTCL1/LEP/CRLF2/GPR27/A…	86	6.68563
BP	GO:0060037	pharyngeal system development	11/2423	26/18670	0.000203688	0.00255817	0.00187587	RIPPLY3/TBX1/GATA3/BMP5/TGFB2/NOG/FOLR1/ISL1/EYA1/NKX2-5/BMP7	11	3.31662
BP	GO:0060740	prostate gland epithelium morphogenesis	11/2423	26/18670	0.000203688	0.00255817	0.00187587	ESR1/AR/SFRP1/ID4/FGF10/TNC/GLI2/NOG/SULF1/BMP7/HOXB13	11	2.11058
BP	GO:0042107	cytokine metabolic process	31/2423	124/18670	0.000203962	0.00255817	0.00187587	CD86/LILRB1/PRKCQ/GATA3/SPN/CD3E/CLEC7A/IL10/IL6/TNFRSF8/TLR7/PTPRC/IL18/IFNG/PTAFR/CYBB/SYK/IL1A/IL12B/IGF2BP3/TNFRSF13C/TNF/LTB/TLR8/IL1B/CD80/CARD11/INHA/IRF4/EREG/FOXJ1	31	5.56776
BP	GO:0043405	regulation of MAP kinase activity	67/2423	337/18670	0.000215646	0.00269442	0.00197578	PROK1/SAA1/HTR2B/ADIPOQ/GADD45G/IGF1/MAP4K1/EPGN/SPRED1/MAP3K15/DUSP2/C1QTNF2/PDE5A/ADAM8/TGFB3/CAV3/PIK3CG/IQGAP1/TGFB1/CCL19/GRM1/RASGRP1/FPR1/SFRP1/ADORA1/CD24/PTPRC/PROK2/NTRK3/SPRED3/FGF1/ADORA2B/SYK/ROR2/PTPN22/TNFRSF11A/IGF1R/LAX1/NRK/MAPK10/DKK1/INAVA/TNF/FGF10/GSTP1/IL1B/MUC20/HGF/GRM4/FGFR1/RGS2/DUSP4/RGS4/MST1R/SFRP2/TGFA/LPAR1/ERN2/ADRA2A/VANGL2/BIRC7/CHRNA7/SERPINB3/LPAR3/BMP7/UCHL1/…	67	6.71932
BP	GO:0070372	regulation of ERK1 and ERK2 cascade	61/2423	300/18670	0.000215932	0.00269442	0.00197578	MT3/ADRA1A/NLRP6/HTR2B/ADIPOQ/CCL16/TREM2/SPRED1/LGALS9/FGF19/FFAR4/CCL11/GLIPR2/EPHA7/TGFB1/CCL19/FGF20/GPR183/RASGRP1/FPR2/PTPRC/P2RY6/EMILIN1/HAVCR2/CCR7/DUSP26/MARCO/GPNMB/SYK/GPR55/FBLN1/PTPN22/PDGFRA/TNFRSF11A/APELA/CCL22/PKHD1/TNF/CCL26/FGF10/GSTP1/IL1B/CHRNA9/DUSP4/ERBB4/CCL7/SEMA6A/FGF4/FGF23/ALKAL2/DRD2/NPY5R/ARHGAP8/C1QL4/HAND2/LIF/CALCR/WNK2/HTR2C/ALKAL1/CHRNA7	61	6.27381
BP	GO:0035265	organ growth	45/2423	204/18670	0.000217769	0.00269442	0.00197578	RSPO2/ESR1/COL7A1/AR/ADRA1A/LEPR/IGF1/POR/PI16/COL14A1/COL12A1/TBX5/CAV3/SASH3/MYH6/VWA2/TBX20/FOXC2/FGF20/COL6A2/FGF7/ARX/COL6A3/G6PD/TGFB2/GLI1/FGF10/CYP19A1/BASP1/FGFR1/RGS2/ERBB4/RGS4/LEP/WNT2/NOG/TENM4/MSX2/CER1/PSAPL1/BNC2/COMP/MMP13/KCNK2/NKX2-5	45	4.32306
BP	GO:0002695	negative regulation of leukocyte activation	40/2423	175/18670	0.000218352	0.00269442	0.00197578	LGALS9/CD86/CNR2/IL13RA2/PDE5A/LILRB1/CD84/SPN/TNFRSF21/TGFB1/IL2/IL10/JAK3/SFRP1/SAMSN1/PTPRC/PGLYRP3/CTLA4/HAVCR2/GLI3/GPNMB/TAFA3/TIGIT/PTPN22/MNDA/LAX1/IL2RA/TNFRSF13B/ABR/CD80/INHA/GAL/TYRO3/SCGB1A1/SOX11/PGLYRP4/PLA2G2D/BANK1/FOXJ1/VTCN1	40	6.32456
BP	GO:0032642	regulation of chemokine production	23/2423	82/18670	0.000218898	0.00269442	0.00197578	C1QTNF3/ADIPOQ/TREM2/LGALS9/FFAR2/APOD/CLEC7A/CHIA/IL10/IL6/TLR7/HAVCR2/IFNG/ADORA2B/SYK/TWIST1/TNF/GSTP1/IL1B/MCOLN2/ALOX15B/POSTN/CXCL6	23	3.96177
BP	GO:0010273	detoxification of copper ion	8/2423	15/18670	0.000218922	0.00269442	0.00197578	MT1B/MT1X/MT1M/MT2A/MT1G/MT3/MT1E/MT1H	8	-2.82843
BP	GO:0046851	negative regulation of bone remodeling	8/2423	15/18670	0.000218922	0.00269442	0.00197578	GREM1/TNFRSF11B/IL6/SFRP1/CD38/UBASH3B/TMEM119/CLDN18	8	2.82843
BP	GO:0090494	dopamine uptake	8/2423	15/18670	0.000218922	0.00269442	0.00197578	DRD1/SLC6A2/SLC22A1/GDNF/SLC6A3/SNCA/DRD2/MAPK15	8	0
BP	GO:1990169	stress response to copper ion	8/2423	15/18670	0.000218922	0.00269442	0.00197578	MT1B/MT1X/MT1M/MT2A/MT1G/MT3/MT1E/MT1H	8	-2.82843
BP	GO:0030900	forebrain development	74/2423	381/18670	0.000220666	0.00271026	0.0019874	DRD1/SLC1A2/ASCL1/LHX3/TBX3/SSTR1/TNR/PPARGC1A/FOXB1/TBR1/PLXNA3/GSC/SLIT1/SOX2/LAMB1/HAP1/NEUROG3/POU3F2/ADGRG1/AQP1/ITGAM/LHX5/VAX2/OLIG2/ID4/OXTR/GLI3/DLX5/FLNA/GRIN1/P2RY12/ARX/BCL11B/SLC6A3/CHD5/SLC2A1/SLITRK5/PITX1/CRTAC1/DKK1/KIRREL3/GLI1/FGF10/SLIT2/ATOH1/DCLK1/WNT1/RFX4/FGFR1/TYRO3/ERBB4/COL3A1/GLI2/NOG/DRD2/ISL1/LRP8/LPAR1/SEMA3A/NTRK2/LHX1/NRG3/SSTR3/EPHB3/ANXA3/LHX8/CDK5R2/CRHR1/EPHA5…	74	6.74236
BP	GO:0001774	microglial cell activation	16/2423	48/18670	0.000229811	0.00281091	0.0020612	IL13/TREM2/ITGB2/IL6/ITGAM/TLR7/FPR2/PTPRC/MMP8/IFNG/TAFA3/SNCA/STAP1/TNF/TLR8/SPHK1	16	3.5
BP	GO:0002269	leukocyte activation involved in inflammatory response	16/2423	48/18670	0.000229811	0.00281091	0.0020612	IL13/TREM2/ITGB2/IL6/ITGAM/TLR7/FPR2/PTPRC/MMP8/IFNG/TAFA3/SNCA/STAP1/TNF/TLR8/SPHK1	16	3.5
BP	GO:0009072	aromatic amino acid family metabolic process	14/2423	39/18670	0.000232451	0.00283734	0.00208058	HPD/TAT/IDO2/MTHFD1/HGD/UROC1/AADAT/HAAO/GSTZ1/AMDHD1/GCDH/HPDL/TPH1/IL4I1	14	-2.13809
BP	GO:0030282	bone mineralization	29/2423	114/18670	0.000234259	0.00285352	0.00209245	RSPO2/IGF1/FGR/TGFB3/GREM1/MGP/IBSP/TGFB1/OMD/GPNMB/ROR2/PTGS2/TWIST1/PHEX/WNT10B/TFAP2A/COL1A2/LEP/TMEM119/RFLNA/FGF23/PTHLH/CER1/FBN2/BMPR1B/COMP/MMP13/BMP7/NELL1	29	4.64238
BP	GO:1901654	response to ketone	43/2423	193/18670	0.000236226	0.00287158	0.00210569	ADCY8/DSG1/AR/ABCB4/PCK2/CPS1/MAP4K1/SLIT3/AKR1B1/TGFB3/AANAT/PTGFR/AQP1/TGFB1/DSG2/CCL19/ADCY2/ADCY5/SFRP1/PTGER4/NTRK3/P2RY6/CCR7/PTAFR/OXTR/CYBB/HPCA/CD38/P2RY4/FIBIN/SPP1/UCN3/CLDN4/TGFB2/ACOD1/SLIT2/TNC/CATSPERB/HOXB13/CFTR/EFNA5/NEFL/CA9	43	4.72746
BP	GO:0007162	negative regulation of cell adhesion	59/2423	289/18670	0.000243049	0.00294846	0.00216207	ADIPOQ/TNR/PLG/LGALS9/CD86/JAG1/CCL28/PLXNA3/PDE5A/LILRB1/C1QTNF1/ADAM22/APOD/PTPRO/SPN/TNFRSF21/TGFB1/NEXMIF/IL2/IL10/JAK3/PTPRC/SEMA4D/CTLA4/HAVCR2/GLI3/GPNMB/ARHGDIG/FBLN1/SERPINE2/TIGIT/PTPN22/MUC21/LAX1/MELTF/IL2RA/CD80/MMP14/TNC/WNT1/AJAP1/FZD7/COL1A1/UBASH3B/SEMA6A/PLXNB3/TACSTD2/SCGB1A1/EPCAM/POSTN/PLA2G2D/ADAMDEC1/SPINT2/SEMA3E/MUC1/EFNA5/FOXJ1/MMP12/VTCN1	59	6.90001
BP	GO:1903307	positive regulation of regulated secretory pathway	17/2423	53/18670	0.000250499	0.00303263	0.00222378	CACNA1I/IL13/SYT9/KCNB1/FGR/ITGB2/ITGAM/PTAFR/ADORA2B/SYK/CACNA1G/UNC13D/SYT4/CD177/NLGN1/CDK5R2/CRHR1	17	2.18282
BP	GO:0006721	terpenoid metabolic process	30/2423	120/18670	0.000256187	0.00308896	0.00226509	CYP3A4/CYP1A2/CYP1A1/CYP2E1/UGT1A3/ADH1B/CYP2C9/ADH4/CYP2C8/ADH7/ADH1C/APOC3/ADH6/RDH5/TTR/ADH1A/RDH16/AKR1B1/UGT1A8/RBP2/CRABP1/SDR16C5/APOA4/GPC4/CYP26B1/GPC2/CRABP2/LRP8/STRA6/CLPS	30	-0.730297
BP	GO:0051208	sequestering of calcium ion	32/2423	131/18670	0.000256195	0.00308896	0.00226509	DRD1/IL13/HTR2B/JPH1/JPH3/TRPM2/FASLG/LCK/RASA3/HAP1/CORO1A/TGFB1/CCL19/CXCL9/CCR5/ANK2/PTPRC/P2RY6/CCR7/SNCA/RYR1/CEMIP/JSRP1/CD19/MCOLN2/UBASH3B/DRD2/MCOLN3/HTR2C/TRDN/ITPR3/TRPA1	32	4.59619
BP	GO:0034103	regulation of tissue remodeling	24/2423	88/18670	0.00025741	0.00309101	0.00226659	PDK4/LEPR/ADAM8/GREM1/TNFRSF11B/TGFB1/IL2/MC4R/IL6/SFRP1/IL18/GPNMB/SYK/IL12B/CD38/TNFRSF11A/SPP1/ABR/UBASH3B/LEP/TMEM119/HAND2/CLDN18/IL20RA	24	4.08248
BP	GO:0048644	muscle organ morphogenesis	24/2423	88/18670	0.00025741	0.00309101	0.00226659	MYL2/TBX1/GSC/MYH6/TGFB1/TBX20/FOXC2/ANKRD1/TNNI3/TGFB2/MYH7/FZD1/COL3A1/WNT2/MYBPC2/NOG/FZD2/SHOX2/ISL1/LIF/XIRP2/VANGL2/NKX2-5/COL11A1	24	4.89898
BP	GO:0042093	T-helper cell differentiation	18/2423	58/18670	0.000264865	0.00316569	0.00232136	SLAMF6/CD86/IL12RB1/GATA3/LY9/SPN/CCL19/IL2/MYB/GPR183/IL6/JAK3/PTGER4/IL18/IL12B/SEMA4A/CD80/IRF4	18	4.24264
BP	GO:0061900	glial cell activation	18/2423	58/18670	0.000264865	0.00316569	0.00232136	IL13/TREM2/ITGB2/IL6/ITGAM/TLR7/FPR2/PTPRC/MMP8/IFNG/TAFA3/SNCA/STAP1/TNF/TLR8/IL1B/SPHK1/BACE2	18	3.77124
BP	GO:0030593	neutrophil chemotaxis	27/2423	104/18670	0.000265521	0.00316569	0.00232136	SAA1/CCL16/S100A9/VAV1/CCL11/NCKAP1L/PIK3CG/PIK3CD/ITGB2/CCL19/CXCL9/RAC2/CCR7/SYK/CXCL3/CCL22/CSF3R/CXCL8/TGFB2/CCL26/SLIT2/IL1B/CCL7/PF4V1/CXCL1/CXCL6/CXCL5	27	4.42635
BP	GO:0099504	synaptic vesicle cycle	43/2423	194/18670	0.00026606	0.00316569	0.00232136	DRD1/CAMK2A/SYT9/ADRA1A/CHRNA4/SLC2A4/STX3/SLC18A1/P2RX1/NLGN3/APBA2/PRKCB/OTOF/SLC17A8/RIMS4/PFN2/ADORA2B/CHRNA5/SV2A/SNCA/DNM1/P2RY4/CHRNA6/SNPH/UNC13C/CTBP2/RAB27B/AMPH/SNCB/PRKCG/SYNDIG1/DOC2A/STXBP5L/SYT4/SNAP25/DRD2/UNC13A/PCLO/NRXN1/NLGN1/SYT8/CADPS/SNAP91	43	4.72746
BP	GO:0003207	cardiac chamber formation	7/2423	12/18670	0.000267907	0.00316569	0.00232136	TBX5/SMARCD3/TBX20/SOX4/SOX11/HAND2/NKX2-5	7	2.64575
BP	GO:0016081	synaptic vesicle docking	7/2423	12/18670	0.000267907	0.00316569	0.00232136	CAMK2A/STX3/SNPH/UNC13C/CTBP2/SNAP25/UNC13A	7	1.88982
BP	GO:0070486	leukocyte aggregation	7/2423	12/18670	0.000267907	0.00316569	0.00232136	S100A9/ZAP70/RAC2/SEMA4D/IL1B/HAS2/BMP7	7	2.64575
BP	GO:0071639	positive regulation of monocyte chemotactic protein-1 production	7/2423	12/18670	0.000267907	0.00316569	0.00232136	ADIPOQ/LGALS9/CLEC7A/SYK/TWIST1/IL1B/MCOLN2	7	1.88982
BP	GO:0072593	reactive oxygen species metabolic process	58/2423	284/18670	0.000270385	0.0031886	0.00233815	CYP1A2/CYP1A1/ACE2/DRD5/TAFA4/MT3/PDK4/GLS2/HP/HBD/HBM/RGN/CPS1/POR/RIPK3/VAV1/CRYAB/HBQ1/ITGB2/TGFB1/CLEC7A/MMP3/PTX3/UCP1/IL10/RAC2/ITGAM/SOD3/FPR2/NCF2/MMP8/IFNG/DUOX1/CYBB/SYK/GRIN1/PTGS2/SNCA/APOA4/NCF1/ADGRB1/G6PD/INAVA/TNF/ACOD1/GSTP1/IL1B/PLA2R1/TFAP2A/PTGIS/LEP/CD177/HBE1/PMAIP1/BMP7/DUOXA1/DUOXA2/DUOX2	58	3.93919
BP	GO:0072028	nephron morphogenesis	22/2423	78/18670	0.000272733	0.0032099	0.00235377	GDNF/HNF1B/GATA3/ADAMTS16/HOXB7/TGFB1/FGF1/IRX2/GLI3/HOXA11/FMN1/KIF26B/WNT1/FOXD1/NOG/TACSTD2/LIF/EYA1/LHX1/HOXD11/SIX2/BMP7	22	4.26401
BP	GO:0031644	regulation of neurological system process	33/2423	137/18670	0.000273282	0.00320997	0.00235383	SMR3A/SMR3B/OPRPN/TMEM100/TAFA4/CUX2/P2RX3/TNR/NLGN3/TNFRSF21/GRM1/FABP5/CACNB3/CELF4/IL10/ADORA1/PTAFR/GRIN1/IGSF9B/S100B/HGF/ZNF488/RGS4/MTNR1B/SHISA9/TENM4/NRXN1/HTR2C/NPTX2/CHRNA7/NLGN1/IGSF11/NPTX1	33	2.95932
BP	GO:0014706	striated muscle tissue development	75/2423	390/18670	0.00027494	0.00322306	0.00236343	ACTN2/TBX3/P2RX2/HLF/ADRA1A/IGF1/PGM5/PI16/ANKRD2/NIBAN2/DCN/NEB/KLF5/TBX5/MYL2/EGR2/GREM1/CAV3/TBX1/MYH6/TGFB1/DSG2/TBX20/FOXC2/FGF20/KEL/POPDC3/NEBL/ANKRD1/ASB2/TWIST1/SGCG/PDGFRA/RYR1/PITX1/ANKRD33/FOXL2/G6PD/TNNI3/BMP5/S100B/DKK1/HDAC9/TGFB2/GLI1/MYH7/CYP26B1/CHRNA1/MYH15/WNT10B/FGFR1/RGS2/FZD7/ERBB4/RGS4/WNT2/MSC/MYBPC2/NOG/SOX11/TENM4/SHOX2/ISL1/VAX1/FHOD3/CHRND/EYA1/MYOD1/XIRP2/KCNK2/NKX2-…	75	7.04367
BP	GO:0050891	multicellular organismal water homeostasis	20/2423	68/18670	0.000277168	0.00323223	0.00237015	CYP11B2/ACER1/ADCY8/CYP4A11/AKR1B1/AQP1/ADCY2/ADCY5/ATP6V1B1/ALOX12B/CLDN4/CYP26B1/HAS2/TFAP2B/ABCA12/KRT16/ALOXE3/CFTR/BPIFA1/FA2H	20	2.68328
BP	GO:0002689	negative regulation of leukocyte chemotaxis	9/2423	19/18670	0.000278452	0.00323223	0.00237015	NBL1/GREM1/GPR18/PADI2/MMP28/SLAMF8/STAP1/CYP19A1/SLIT2	9	3
BP	GO:0002922	positive regulation of humoral immune response	9/2423	19/18670	0.000278452	0.00323223	0.00237015	C6/HPX/KLK7/LTA/PTPRC/CCR7/TNF/ACOD1/IL1B	9	1.66667
BP	GO:0006833	water transport	9/2423	19/18670	0.000278452	0.00323223	0.00237015	AQP6/AQP8/AQP9/MIP/AQP1/AQP10/PDZD3/HAS2/CFTR	9	0.333333
BP	GO:2000696	regulation of epithelial cell differentiation involved in kidney development	9/2423	19/18670	0.000278452	0.00323223	0.00237015	ADIPOQ/GDNF/GATA3/PRKX/CD24/MMP9/LIF/LHX1/PROM1	9	1.66667
BP	GO:0003401	axis elongation	12/2423	31/18670	0.000287169	0.00332039	0.00243479	ESR1/NKD1/PTK7/HNF1B/TGFB1/AREG/SFRP1/FGF1/FGF10/TNC/SFRP2/VANGL2	12	2.3094
BP	GO:0009954	proximal/distal pattern formation	12/2423	31/18670	0.000287169	0.00332039	0.00243479	IRX2/GLI3/HOXA11/GLI1/FGF10/CYP26B1/EN1/HOXC11/SP8/GLI2/HOXC10/SIX3	12	3.4641
BP	GO:0021953	central nervous system neuron differentiation	41/2423	183/18670	0.00028779	0.00332109	0.00243531	DRD1/ASCL1/LHX3/TBR1/PLXNA3/TBX20/LHX5/SFRP1/OLIG2/ID4/GLI3/DLX5/ARX/BCL11B/CHD5/NKX6-1/DKK1/SLIT2/FZD1/DCLK1/ISL2/WNT1/SOX4/ERBB4/LEP/WNT2/GLI2/SFRP2/FAIM2/DRD2/MNX1/ISL1/HOXC10/CDH11/SEMA3A/GRID2/NTRK2/LHX1/EPHB3/LHX8/LBX1	41	5.46608
BP	GO:0016101	diterpenoid metabolic process	28/2423	110/18670	0.000294303	0.00338964	0.00248558	CYP3A4/CYP1A2/CYP1A1/UGT1A3/ADH1B/ADH4/CYP2C8/ADH7/ADH1C/APOC3/ADH6/RDH5/TTR/ADH1A/RDH16/AKR1B1/UGT1A8/RBP2/CRABP1/SDR16C5/APOA4/GPC4/CYP26B1/GPC2/CRABP2/LRP8/STRA6/CLPS	28	-0.377964
BP	GO:0006706	steroid catabolic process	11/2423	27/18670	0.000303616	0.00345978	0.00253701	CYP3A4/CYP1A2/MT3/CYP39A1/CYP7A1/HSD17B6/TRERF1/SPP1/CYP19A1/FGF23/CYP24A1	11	-0.301511
BP	GO:0035902	response to immobilization stress	11/2423	27/18670	0.000303616	0.00345978	0.00253701	CYP1A2/CYP1A1/REN/TGFB1/PITX3/TPH1/UCN3/GAL/CRHR1/TFF1/NR0B1	11	1.50756
BP	GO:0060384	innervation	11/2423	27/18670	0.000303616	0.00345978	0.00253701	ITGA4/SERPINE2/SLITRK6/PRKCG/NTF4/SULF1/ISL1/UNC13A/SEMA3A/NPTX1/GABRA5	11	3.31662
BP	GO:0032331	negative regulation of chondrocyte differentiation	10/2423	23/18670	0.000303792	0.00345978	0.00253701	CHADL/NKX3-2/GREM1/EFEMP1/ADAMTS12/CCN4/GLI2/RFLNA/PTHLH/WNT9A	10	2.52982
BP	GO:0045109	intermediate filament organization	10/2423	23/18670	0.000303792	0.00345978	0.00253701	KRT2/PKP1/DES/KRT14/EPPK1/KRT9/NEFM/KRT17/KRT20/NEFL	10	3.16228
BP	GO:0048592	eye morphogenesis	35/2423	149/18670	0.0003039	0.00345978	0.00253701	NKD1/COL8A1/JAG1/FASLG/CABP4/FSCN2/TENM3/VAX2/EFEMP1/PITX3/GLI3/CALB1/TWIST1/FOXL2/HCN1/COL5A1/PTF1A/TFAP2A/TFAP2B/FOXF2/RORB/COL8A2/WNT2/SOX11/FBN2/MFAP2/WNT9A/NTRK2/LHX1/ATP8A2/STRA6/BMP7/PITX2/SIX3/PROM1	35	5.57802
BP	GO:0060021	roof of mouth development	24/2423	89/18670	0.000309687	0.00351215	0.00257541	TBX3/TGFB3/TBX1/COL11A2/GLI3/DLX5/TWIST1/DLX6/PDGFRA/TGFB2/FZD1/TFAP2A/PRRX1/FOXF2/MSC/FRAS1/FZD2/SOX11/VAX1/HAND2/BNC2/FOXE1/EPHB3/ALX1	24	4.49073
BP	GO:1901019	regulation of calcium ion transmembrane transporter activity	24/2423	89/18670	0.000309687	0.00351215	0.00257541	STRIT1/KCNE2/RGN/JPH1/JPH3/CAV3/CBARP/HAP1/CACNA2D1/CACNB3/ANK2/P2RY6/GEM/HPCA/CACNB1/RRAD/JSRP1/SLN/STAC/DRD2/STAC2/ADRA2A/TRDN/CRHR1	24	3.67423
BP	GO:0071526	semaphorin-plexin signaling pathway	14/2423	40/18670	0.000315262	0.00356174	0.00261177	GDNF/SH3BP1/PLXNA3/SEMA6D/SEMA3D/SEMA4D/FLNA/SEMA4A/SEMA6A/PLXNB3/HAND2/SEMA3A/SEMA3E/SEMA3C	14	3.20713
BP	GO:0090184	positive regulation of kidney development	14/2423	40/18670	0.000315262	0.00356174	0.00261177	ADIPOQ/GDNF/GATA3/HOXB7/TGFB1/CD24/BASP1/FOXD1/NOG/LIF/LHX1/LIN28A/SERPINB7/PROM1	14	2.67261
BP	GO:0006584	catecholamine metabolic process	17/2423	54/18670	0.00032186	0.00361774	0.00265284	DRD1/DAO/AKR1B1/GATA3/ITGB2/ITGAM/SNCAIP/SLC6A3/SNCA/TGFB2/GRIN2A/SNCB/MOXD1/DRD2/INSM1/HAND2/TACR3	17	3.15296
BP	GO:0009712	catechol-containing compound metabolic process	17/2423	54/18670	0.00032186	0.00361774	0.00265284	DRD1/DAO/AKR1B1/GATA3/ITGB2/ITGAM/SNCAIP/SLC6A3/SNCA/TGFB2/GRIN2A/SNCB/MOXD1/DRD2/INSM1/HAND2/TACR3	17	3.15296
BP	GO:0050886	endocrine process	23/2423	84/18670	0.000322052	0.00361774	0.00265284	CYP11B2/C1QTNF3/ACE2/REN/TBX3/MME/DRD5/RASL10B/NIBAN2/C1QTNF1/GATA3/AVPR1B/OXTR/RETN/FOXL2/IL1B/INHA/FGFR1/GAL/LEP/FOXD1/TAC1/CRHR1	23	1.4596
BP	GO:0032103	positive regulation of response to external stimulus	64/2423	323/18670	0.000324582	0.00363926	0.00266862	VEGFD/FABP4/PLG/KLKB1/TREM2/CCR6/LGALS9/STX3/KLK7/S100A9/LTA/SMOC2/NCKAP1L/ADAM8/FFAR2/IL12A/PIK3CG/C2CD4A/TGFB1/CLEC7A/CCL19/ARTN/CCR4/IL2/RAC2/IL6/TLR7/FPR2/MMP8/PTGER4/NTRK3/IL18/HAVCR2/CCR7/S100A14/ADORA2B/P2RY12/TAFA3/IL12B/PTGS2/OSM/CCN4/SNCA/TNFRSF11A/ABCC1/STAP1/CXCL8/TNF/F3/CCL26/FGF10/ACOD1/SLIT2/IL1B/MAPK13/FGFR1/GBP5/CCL7/CXCL14/NPY5R/LPAR1/SCG2/TLR10/TAC1	64	7
BP	GO:0035282	segmentation	26/2423	100/18670	0.000333474	0.00372484	0.00273138	TBX3/NKD1/RIPPLY1/FOXB1/EGR2/HOXA2/CRB2/FOXC2/SFRP1/MEOX1/IRX2/ROR2/TIFAB/MLLT3/DKK1/HES7/BASP1/RIPPLY2/DMRT2/SFRP2/SEMA3A/DLL3/LHX1/CDX2/SEMA3C/TDRD5	26	3.92232
BP	GO:0060079	excitatory postsynaptic potential	26/2423	100/18670	0.000333474	0.00372484	0.00273138	P2RX2/CUX2/P2RX3/CHRNA4/P2RX1/NLGN3/CACNB3/P2RX5/CELF4/ADORA1/GRIN1/CHRNA5/SNCA/CHRNA6/MPP2/GRIN2A/CHRNA1/CHRNA9/RGS4/DRD2/CHRND/GRID2/NRXN1/CHRNA7/NLGN1/IGSF11	26	3.53009
BP	GO:1901616	organic hydroxy compound catabolic process	21/2423	74/18670	0.000339646	0.00378664	0.00277669	SULT1B1/ADH4/ADH7/MT3/CYP39A1/SORD/CYP7A1/CYP4A11/LDHD/ALDH2/HAO1/SULT2A1/TRERF1/INPP5J/SLC6A3/MIOX/SULT1C4/MOXD1/FGF23/CYP24A1/ALDH3B2	21	-0.654654
BP	GO:0071774	response to fibroblast growth factor	35/2423	150/18670	0.000347752	0.00386972	0.00283761	CPS1/SPRED1/FGF19/SMOC2/TBX1/GATA3/IQGAP1/SHCBP1/RUNX2/FGF20/FGF7/SFRP1/FGFBP1/FGF1/HHIP/SNCA/ANOS1/CXCL8/FGF10/SHISA2/TNC/FGFR1/COL1A1/FLRT2/FGF4/NOG/SCGB1A1/SULF1/FGF23/GALNT3/LHX1/POSTN/CREB3L1/FGF5/ESRP1	35	5.57802
BP	GO:0048483	autonomic nervous system development	15/2423	45/18670	0.000357872	0.00397486	0.00291471	ASCL1/GDNF/PLXNA3/EGR2/TBX1/GATA3/TLX2/TFAP2A/SOX4/TFAP2B/SOX11/INSM1/HAND2/SEMA3A/GFRA3	15	2.84019
BP	GO:2000310	regulation of NMDA receptor activity	13/2423	36/18670	0.000361401	0.00400654	0.00293794	ACTN2/RASGRF1/PPARGC1A/GRIA4/NLGN3/IFNG/GRIN1/GRIN2A/DLG3/GRIA2/ANXA3/NLGN1/NEFL	13	1.94145
BP	GO:0007369	gastrulation	41/2423	185/18670	0.00036576	0.00404729	0.00296782	COL7A1/ADIPOQ/COL8A1/COL12A1/HNF1B/GSC/CRB2/SOX2/MIXL1/LAMB1/ITGA4/TLX2/ITGB2/TBX20/FOXC2/IL10/SFRP1/PHLDB1/MMP8/HOXA11/APELA/DKK1/COL5A1/MMP14/FGFR1/FZD7/MMP2/SFRP2/NOG/TENM4/ITGB4/MMP9/CER1/EYA1/LHX1/VANGL2/ITGA3/SIX2/BMP7/COL11A1/HMGA2	41	5.77843
BP	GO:0008202	steroid metabolic process	65/2423	331/18670	0.000378369	0.004179	0.0030644	CYP11B2/CYP3A4/CYP1A2/CYP1A1/SULT4A1/CYP3A43/ESR1/CYP2E1/SLC27A5/CYP8B1/CYP2B6/SULT1B1/HSD11B1/SEC14L2/ABCB11/CYP2C9/SRD5A2/CYP2C8/MT3/CYP2A6/ACADL/CYP39A1/G6PC/AMACR/UGT2B7/APOF/CYP7A1/APOA5/LEPR/BAAT/APOC1/RDH5/PPARGC1A/HSD17B6/POR/PON1/RDH16/SULT2A1/CGA/NR1I2/LCAT/FGF19/TRERF1/AKR1B1/UGT1A8/IFNG/FGF1/PDGFRA/APOA4/GNB3/SPP1/G6PD/TFCP2L1/BMP5/TNF/CYP19A1/IL1B/CYP26B1/FGFR1/GAL/LEP/FGF23/CFTR/CYP…	65	-2.10859
BP	GO:0071229	cellular response to acid chemical	45/2423	209/18670	0.000383901	0.0042322	0.00310341	PDK4/ABCB4/PPARGC1A/CPS1/CPEB3/PTK7/LTK/FFAR2/TEAD2/TBX1/HOXA2/PTGFR/AQP1/MYB/UCP1/SFRP1/PTGER4/NTRK3/P2RY6/PTAFR/CYBB/PDGFRA/TESC/P2RY4/BCL11A/TNF/EPHA3/CYP26B1/TNC/WNT10B/FZD7/COL1A2/MMP2/GJB3/COL1A1/COL3A1/COL16A1/LEP/RORB/WNT2/FOLR1/WNT9A/NTRK2/CPEB1/WNT7B	45	5.21749
BP	GO:0090493	catecholamine uptake	8/2423	16/18670	0.000388072	0.00426983	0.00313101	DRD1/SLC6A2/SLC22A1/GDNF/SLC6A3/SNCA/DRD2/MAPK15	8	0
BP	GO:0010718	positive regulation of epithelial to mesenchymal transition	16/2423	50/18670	0.000389269	0.00426983	0.00313101	JAG1/TGFB3/CRB2/GLIPR2/TGFB1/IL6/TWIST1/TGFB2/IL1B/OLFM1/COL1A1/PDPN/ISL1/SERPINB3/ALX1/BMP7	16	4
BP	GO:0045088	regulation of innate immune response	84/2423	452/18670	0.000389478	0.00426983	0.00313101	ESR1/NLRP6/HPX/MUCL1/TREM2/LGALS9/SLAMF6/S100A9/VAV1/PYHIN1/FGR/ADAM8/LILRB1/BIRC3/FFAR2/IL12A/HCK/TRIM6/ICAM3/CLEC4E/IKBKE/ULBP2/ITGB2/TREML4/CLEC7A/MUC15/ULBP3/SH2D1A/SMPDL3B/MUC12/FCRL3/ITGAM/CR1/RASGRP1/TLR7/FPR2/PGLYRP3/CRTAM/HAVCR2/IFNG/SLAMF8/S100A14/MARCO/CTSK/CGAS/KIR2DL4/SYK/IL12B/PTPN22/MUC21/MNDA/ZBP1/TREML2/INAVA/CLEC4C/ACOD1/TLR8/CARD11/MUC20/ULBP1/TNIP3/REG3G/TYRO3/GBP5/MUC5B/LEP/R…	84	8.5105
BP	GO:0071621	granulocyte chemotaxis	30/2423	123/18670	0.000404112	0.00441381	0.00323659	SAA1/CCL16/S100A9/VAV1/CCL11/NCKAP1L/PIK3CG/PIK3CD/ITGB2/CCL19/CXCL9/RAC2/CCR7/S100A14/SYK/ADGRE2/CXCL3/CCL22/CSF3R/CXCL8/TGFB2/CCL26/SLIT2/IL1B/CCL7/PF4V1/CXCL1/SCG2/CXCL6/CXCL5	30	4.74693
BP	GO:0001975	response to amphetamine	12/2423	32/18670	0.000405593	0.00441381	0.00323659	DRD1/DRD5/CNR2/RGS17/OXTR/GRIN1/HDAC9/GRIN2A/RGS2/RGS4/DRD2/PPP1R1B	12	2.3094
BP	GO:0003338	metanephros morphogenesis	12/2423	32/18670	0.000405593	0.00441381	0.00323659	GDNF/CALB1/FMN1/FGF10/KIF26B/BASP1/FRAS1/LIF/LHX1/SIX2/FOXJ1/WNT7B	12	2.88675
BP	GO:0060325	face morphogenesis	12/2423	32/18670	0.000405593	0.00441381	0.00323659	MYH3/TGFB3/TBX1/TGFB1/DLX5/PDGFRA/DKK1/MMP2/COL1A1/NOG/PAX9/STRA6	12	2.88675
BP	GO:0002886	regulation of myeloid leukocyte mediated immunity	17/2423	55/18670	0.000410162	0.00444718	0.00326105	IL13/LGALS9/IL13RA2/FGR/CD84/ITGB2/RAC2/ITGAM/PTAFR/ADORA2B/SYK/ADGRE2/ABR/UNC13D/CD177/CXCL6/CRHR1	17	3.63803
BP	GO:0061098	positive regulation of protein tyrosine kinase activity	17/2423	55/18670	0.000410162	0.00444718	0.00326105	ADRA1A/EPGN/GRM5/BDNF/ADORA1/CD24/FCGR1A/STAP1/NCF1/DLG3/ALKAL2/TGFA/LRP8/NTRK2/ADRA2A/ALKAL1/EREG	17	3.63803
BP	GO:0007422	peripheral nervous system development	21/2423	75/18670	0.000414818	0.00448125	0.00328603	GDNF/ASIC2/PMP22/ADAM22/EGR2/NEUROG3/POU3F2/ARTN/BDNF/NTRK3/CNTNAP1/ADGRB1/NTF4/ISL2/ADGRB2/ISL1/HAND2/NTRK2/UGT8/GFRA3/FA2H	21	4.14614
BP	GO:0021536	diencephalon development	21/2423	75/18670	0.000414818	0.00448125	0.00328603	LHX3/FOXB1/SOX2/HAP1/POU3F2/OLIG2/ARX/SLC6A3/PITX1/GLI1/FGF10/WNT1/GLI2/NOG/DRD2/ISL1/SEMA3A/CRHR1/PITX2/SIX3/NR0B1	21	4.14614
BP	GO:0001837	epithelial to mesenchymal transition	33/2423	140/18670	0.000416378	0.00448174	0.0032864	TMEM100/JAG1/TGFB3/TBX5/GREM1/GSC/CRB2/GLIPR2/TGFB1/IL6/SFRP1/PHLDB1/TWIST1/BMP5/TGFB2/EPHA3/IL1B/HGF/HAS2/OLFM1/COL1A1/FOXF2/WNT2/PDPN/SFRP2/NOG/MSX2/ISL1/OVOL2/SERPINB3/ALX1/BMP7/HMGA2	33	5.39641
BP	GO:0035725	sodium ion transmembrane transport	33/2423	140/18670	0.000416378	0.00448174	0.0032864	SLC12A1/SLC9C2/ABCB11/FXYD1/ASIC2/TRPM2/CAV3/SLC34A3/SLC9A5/ASIC4/SLC9A3/SCN2B/TESC/FXYD2/HCN1/SCN7A/SLC24A2/SCN3B/SLC9A4/ANK3/ATP1A4/NALCN/ATP1A3/SLC24A3/WNK2/SLC4A11/SLC9C1/FXYD3/ATP12A/HCN4/BPIFA1/SLC28A3/SLC34A2	33	4.35194
BP	GO:0007565	female pregnancy	42/2423	192/18670	0.000417358	0.00448414	0.00328816	ESR1/DSG1/AR/LGALS9/AKR1B1/TGFB3/STC2/TGFB1/DSG2/PRLHR/LDOC1/HAVCR2/IGFBP5/OXTR/FBLN1/PTGS2/CD38/SLC2A1/APELA/SPP1/TFCP2L1/CLDN4/ACOD1/IL1B/RGS2/PTGIS/RLN2/MMP2/EPYC/COL16A1/LEP/SCGB1A1/PTHLH/MMP9/DDR1/PNOC/LIF/PRL/ITGA3/HMX3/CRHR1/MMP7	42	5.55492
BP	GO:0045576	mast cell activation	18/2423	60/18670	0.000421764	0.00449291	0.00329459	IL13/LGALS9/CNR2/IL13RA2/FGR/PIK3CG/CD84/PIK3CD/RAC2/RHOH/RASGRP1/ADORA2B/SYK/ADGRE2/UNC13D/CRLF2/CRHR1/CHGA	18	3.77124
BP	GO:0035136	forelimb morphogenesis	14/2423	41/18670	0.000422081	0.00449291	0.00329459	RSPO2/TBX3/TBX5/RUNX2/HOXA11/TWIST1/FMN1/EN1/TFAP2A/TFAP2B/CRABP2/MSX2/SHOX2/WNT9A	14	2.67261
BP	GO:0042572	retinol metabolic process	14/2423	41/18670	0.000422081	0.00449291	0.00329459	CYP3A4/CYP1A2/CYP1A1/ADH1B/ADH4/ADH7/ADH1C/ADH6/RDH5/TTR/ADH1A/RDH16/AKR1B1/SDR16C5	14	-2.67261
BP	GO:0150077	regulation of neuroinflammatory response	14/2423	41/18670	0.000422081	0.00449291	0.00329459	IGF1/TREM2/MMP3/IL6/PTPRC/MMP8/IL18/TAFA3/PTGS2/STAP1/TNF/IL1B/SPHK1/MMP9	14	3.20713
BP	GO:1903053	regulation of extracellular matrix organization	14/2423	41/18670	0.000422081	0.00449291	0.00329459	CHADL/TGFB1/FSCN1/IL6/AEBP1/CARMIL2/PHLDB1/EMILIN1/ANTXR1/MELTF/HAS2/FAP/PDPN/DDR1	14	3.20713
BP	GO:0051966	regulation of synaptic transmission, glutamatergic	20/2423	70/18670	0.000422728	0.00449291	0.00329459	DRD1/GLUL/TNR/GRM6/GRM5/NLGN3/GRM1/ADORA1/OXTR/ROR2/PTGS2/SERPINE2/GRM3/DKK1/TNF/GRM4/DRD2/UNC13A/NRXN1/NLGN1	20	3.1305
BP	GO:0060675	ureteric bud morphogenesis	19/2423	65/18670	0.000425482	0.00451408	0.00331011	GDNF/HNF1B/GATA3/ADAMTS16/HOXB7/TGFB1/FGF1/GLI3/HOXA11/FMN1/KIF26B/WNT1/FOXD1/NOG/TACSTD2/EYA1/LHX1/HOXD11/SIX2	19	3.90007
BP	GO:0051250	negative regulation of lymphocyte activation	34/2423	146/18670	0.00043547	0.00461177	0.00338175	LGALS9/CD86/PDE5A/LILRB1/SPN/TNFRSF21/TGFB1/IL2/IL10/JAK3/SFRP1/SAMSN1/PGLYRP3/CTLA4/HAVCR2/GLI3/GPNMB/TIGIT/PTPN22/MNDA/LAX1/IL2RA/TNFRSF13B/CD80/INHA/GAL/TYRO3/SCGB1A1/SOX11/PGLYRP4/PLA2G2D/BANK1/FOXJ1/VTCN1	34	5.83095
BP	GO:0018146	keratan sulfate biosynthetic process	11/2423	28/18670	0.000441791	0.00465374	0.00341253	OGN/CHST1/OMD/PRELP/CHST6/ACAN/B3GNT7/FMOD/B3GNT3/LUM/CHST5	11	3.31662
BP	GO:0045577	regulation of B cell differentiation	11/2423	28/18670	0.000441791	0.00465374	0.00341253	NFAM1/NCKAP1L/IKZF3/FCRL3/SFRP1/SLAMF8/SYK/CD27/CARD11/MMP14/INHA	11	3.31662
BP	GO:1902668	negative regulation of axon guidance	11/2423	28/18670	0.000441791	0.00465374	0.00341253	PLXNA3/SEMA6D/PTPRO/SEMA3D/SEMA4D/SEMA4A/SLIT2/SEMA6A/SEMA3A/SEMA3E/SEMA3C	11	3.31662
BP	GO:0034104	negative regulation of tissue remodeling	9/2423	20/18670	0.000448162	0.00470412	0.00344946	GREM1/TNFRSF11B/IL6/SFRP1/CD38/ABR/UBASH3B/TMEM119/CLDN18	9	3
BP	GO:0042474	middle ear morphogenesis	9/2423	20/18670	0.000448162	0.00470412	0.00344946	NKX3-2/TBX1/GSC/HOXA2/PRRX1/FGFR1/NOG/EYA1/SIX2	9	3
BP	GO:0030902	hindbrain development	35/2423	152/18670	0.000452673	0.00474305	0.00347801	ASCL1/CTNNA2/SSTR1/PPARGC1A/TBR1/HNF1B/EGR2/HOXA2/HAP1/NEUROG3/HOXB3/CD3E/TRNP1/LHX5/CNTN1/FLNA/GRIN1/SERPINE2/EN2/BMP5/GLI1/EN1/PTF1A/WNT1/GLI2/FAIM2/NOG/ZNF365/SEZ6L/LPAR1/GRID2/LHX1/SSTR3/CDK5R2/BMP7	35	4.56383
BP	GO:0045666	positive regulation of neuron differentiation	71/2423	371/18670	0.000455197	0.00476108	0.00349123	SH3GL3/ASCL1/PCP4/CUX2/CPEB3/PTK7/LTK/S100A9/PLXNA3/NBL1/ECT2/LIMK1/ISLR2/NEUROG3/IQGAP1/IL2/BDNF/FGF20/CHODL/SYT3/CNTN1/TENM3/NTRK3/DPYSL3/SEMA4D/NEGR1/ANKRD1/FOXO6/PLPPR5/ZNF804A/NKX6-1/BMP5/DKK1/TIMP2/EPHA3/SLIT2/DBN1/ATOH1/FZD1/GPC2/HGF/FGFR1/RGS2/CRABP2/SYT4/BEND6/RASAL1/L1CAM/GLI2/PLXNB3/SOX11/ALKAL2/SHOX2/UNC13A/LRP8/LPAR1/GRIP1/NTRK2/LIN28A/ATP8A2/STMN2/SLITRK1/ALKAL1/ITGA3/NLGN1/NKX2-5/L…	71	7.23937
BP	GO:0002407	dendritic cell chemotaxis	10/2423	24/18670	0.000460515	0.0047913	0.00351339	CCR6/LGALS9/TRPM2/IL12A/PIK3CG/CCL19/GPR183/CCR5/CCR7/SLAMF8	10	3.16228
BP	GO:0042738	exogenous drug catabolic process	10/2423	24/18670	0.000460515	0.0047913	0.00351339	CYP3A4/CYP1A2/CYP2A13/CYP2E1/CYP2B6/CYP2C9/CYP2A7/CYP2C8/CYP2A6/NR1I2	10	-3.16228
BP	GO:0060343	trabecula formation	10/2423	24/18670	0.000460515	0.0047913	0.00351339	GREM1/CAV3/SFRP1/WNT10B/MMP2/COL1A1/MSX2/FBN2/OVOL2/NKX2-5	10	3.16228
BP	GO:0060291	long-term synaptic potentiation	23/2423	86/18670	0.000465616	0.00483587	0.00354607	DRD1/ADCY8/MME/TNR/STX3/NLGN3/ADORA1/CALB1/SERPINE2/SNCA/S100B/SLC24A2/MPP2/GRIN2A/CALB2/SNAP25/DRD2/NTRK2/CHRNA7/NLGN1/IGSF11/ITPR3/CRHR1	23	3.12772
BP	GO:0003015	heart process	58/2423	290/18670	0.000472345	0.00489716	0.00359102	ACE2/CTNNA3/KCNJ8/CACNG1/ADRA1A/FXYD1/KCNE2/ABCC9/PDE5A/MYL2/CAV3/PIK3CG/MYH6/TNNI2/ATP2A3/DSG2/CACNA2D1/IL2/DES/CACNB3/ANK2/ADORA1/SCN2B/FLNA/KCNE4/CELF2/SGCG/KCNIP1/APELA/RYR1/CACNB1/FXYD2/TNNI3/CACNA1B/KCNK15/TGFB2/MYH7/HSPB7/KCNH2/SCN3B/CACNA1G/RGS2/ATP1A4/RGS4/DRD2/SEMA3A/ATP1A3/CACNG6/TACR3/TRDN/KCND2/FXYD3/ITPR3/NKX2-5/TAC1/TNNT1/CHGA/HCN4	58	5.51487
BP	GO:0097164	ammonium ion metabolic process	44/2423	205/18670	0.000475266	0.00491884	0.00360692	ACER1/DRD1/ACADL/GPLD1/APOA5/DMGDH/DAO/BBOX1/APOC1/BHMT/POR/PON1/LCAT/PLA2G4E/AKR1B1/ITGB2/PLBD1/FABP5/SMPDL3B/ITGAM/DEGS2/SATL1/SLC44A4/SNCAIP/SLC6A3/SNCA/APOA4/TPH1/TGFB2/RAB38/GRIN2A/SNCB/SPHK1/MBOAT2/PLAAT1/PLA2G4D/MOXD1/PCYT1B/PLA2G4A/DRD2/TACR3/PLA2G4F/PLA2G2D/SGPP2	44	2.7136
BP	GO:0007431	salivary gland development	13/2423	37/18670	0.000491543	0.00507842	0.00372394	TGFB3/TGFB1/FGF7/TFCP2L1/TNF/TGFB2/FGF10/HGF/FGFR1/SEMA3A/SEMA3C/BMP7/LAMA1	13	3.60555
BP	GO:0051591	response to cAMP	25/2423	97/18670	0.000495936	0.00511488	0.00375067	ALDH3A1/AQP8/AQP9/REN/PFKFB1/ADIPOQ/CPS1/CDO1/AANAT/PIK3CG/AQP1/AREG/IGFBP5/DUOX1/PTAFR/PENK/SLC6A3/PTPRN/HCN1/WNT10B/SLC5A5/COL1A1/HCN4/CFTR/DUOX2	25	1.8
BP	GO:0072088	nephron epithelium morphogenesis	21/2423	76/18670	0.000504084	0.00518987	0.00380566	GDNF/HNF1B/GATA3/ADAMTS16/HOXB7/TGFB1/FGF1/IRX2/GLI3/HOXA11/FMN1/KIF26B/WNT1/FOXD1/NOG/TACSTD2/LIF/EYA1/LHX1/HOXD11/SIX2	21	4.14614
BP	GO:0150063	visual system development	70/2423	366/18670	0.000506125	0.00520184	0.00381444	CYP1A1/NKD1/USH2A/MIP/COL8A1/JAG1/FASLG/MAB21L2/CABP4/SOX2/GRM6/GATA3/CRYAB/NHS/TGFB1/CRYGN/SMARCD3/FOXC2/CELF4/ITGAM/SLC17A8/FSCN2/TENM3/VAX2/EFEMP1/NTRK3/PITX3/GLI3/HPCA/CALB1/P2RY12/BCL11B/MITF/TWIST1/PDGFRA/SLITRK6/FOXL2/HCN1/TGFB2/MAB21L1/FGF10/COL5A1/CHRDL1/MYH15/PTF1A/TFAP2A/TFAP2B/MTNR1B/FOXF2/RORB/COL8A2/WNT2/SOX11/FBN2/VAX1/MFAP2/WNT9A/BMPR1B/NTRK2/LHX1/ATP8A2/NDP/STRA6/BMP7/LAMA1/PITX2…	70	7.41042
BP	GO:0099565	chemical synaptic transmission, postsynaptic	27/2423	108/18670	0.000508829	0.00522056	0.00382817	P2RX2/CUX2/P2RX3/CHRNA4/P2RX1/NLGN3/CACNB3/P2RX5/CELF4/ADORA1/GRIN1/CHRNA5/IGSF9B/SNCA/CHRNA6/MPP2/GRIN2A/CHRNA1/CHRNA9/RGS4/DRD2/CHRND/GRID2/NRXN1/CHRNA7/NLGN1/IGSF11	27	3.65655
BP	GO:0010838	positive regulation of keratinocyte proliferation	7/2423	13/18670	0.000515396	0.00526059	0.00385752	REG3A/AREG/FGF7/FGF10/REG3G/HAS2/CDH3	7	1.88982
BP	GO:0060601	lateral sprouting from an epithelium	7/2423	13/18670	0.000515396	0.00526059	0.00385752	AR/FGF10/GLI2/NOG/SULF1/VANGL2/BMP7	7	1.88982
BP	GO:0098703	calcium ion import across plasma membrane	7/2423	13/18670	0.000515396	0.00526059	0.00385752	TRPM2/CACNA2D1/FAM155A/FAM155B/TRPV5/CALCR/TRPV6	7	2.64575
BP	GO:0031295	T cell costimulation	17/2423	56/18670	0.000518594	0.005266	0.00386148	CD86/VAV1/LCK/CD3E/TNFSF13B/CCL19/CD5/BTLA/CD24/CTLA4/CCR7/ICOS/TNFRSF13C/CD80/CARD11/PDCD1/HHLA2	17	4.12311
BP	GO:0050879	multicellular organismal movement	17/2423	56/18670	0.000518594	0.005266	0.00386148	ASCL1/MYH3/STRIT1/CAV3/CCDC78/TNNI2/TNNI3/MYH7/JSRP1/CHRNA1/MAP1A/STAC/STAC2/CHRND/ATP8A2/COMP/TNNT1	17	2.66789
BP	GO:0050881	musculoskeletal movement	17/2423	56/18670	0.000518594	0.005266	0.00386148	ASCL1/MYH3/STRIT1/CAV3/CCDC78/TNNI2/TNNI3/MYH7/JSRP1/CHRNA1/MAP1A/STAC/STAC2/CHRND/ATP8A2/COMP/TNNT1	17	2.66789
BP	GO:0072171	mesonephric tubule morphogenesis	19/2423	66/18670	0.000525749	0.00532951	0.00390805	GDNF/HNF1B/GATA3/ADAMTS16/HOXB7/TGFB1/FGF1/GLI3/HOXA11/FMN1/KIF26B/WNT1/FOXD1/NOG/TACSTD2/EYA1/LHX1/HOXD11/SIX2	19	3.90007
BP	GO:0031589	cell-substrate adhesion	68/2423	354/18670	0.000533541	0.00539925	0.00395919	ACTN2/ECM2/PLG/COL8A1/CARMIL1/SMOC2/JAG1/CCL28/FAT2/APOD/LAMB1/ITGA4/CORO1A/VWA2/PTPRO/PRKX/ABI3BP/IQGAP1/MYO1G/CD3E/ITGB2/NEXMIF/EGFL6/LIMCH1/RAC2/EDIL3/FBLN2/EMILIN2/SFRP1/EMILIN1/HPSE/ADAMTS12/CCR7/FLNA/FBLN1/ANTXR1/FMN1/MELTF/EPHA3/CCDC80/MMP14/WNT1/UNC13D/AJAP1/FZD7/TYRO3/HAS2/COL1A1/COL3A1/COL16A1/PDPN/L1CAM/TACSTD2/ITGB6/ITGB4/DDR1/POSTN/ITGA3/EPHB3/SEMA3E/TTYH1/FREM1/EFNA5/LAMC2/MMP12/OLF…	68	7.5186
BP	GO:0009101	glycoprotein biosynthetic process	67/2423	348/18670	0.000547443	0.00553048	0.00405543	B3GALT1/UST/MT3/IGF1/MUCL1/ITM2A/CSGALNACT1/ST8SIA2/DCN/ST8SIA1/GALNT13/B3GALNT1/GALNT6/ST6GALNAC1/GAL3ST1/CCL19/MUC15/GBGT1/HS3ST5/FUT8/MUC12/XYLT1/JAK3/B3GNT9/TMTC2/CHST8/B3GNT8/CCR7/CHST11/MUC21/MGAT3/HS3ST1/CHST3/ACAN/GALNT7/GAL3ST4/HS6ST2/B3GNT7/FUT9/FUT7/MUC20/FUT4/GFPT2/B3GNT3/ST6GAL2/BACE2/GCNT1/TUSC3/MUC5B/FOXL1/GALNT3/FUT3/ST6GALNAC5/GCNT3/BMPR1B/VCAN/VANGL2/A4GNT/MUC1/MUC2/B3GALT2/MUC5…	67	7.208
BP	GO:0021983	pituitary gland development	14/2423	42/18670	0.000558268	0.00561111	0.00411455	LHX3/SOX2/POU3F2/SLC6A3/PITX1/GLI1/FGF10/GLI2/NOG/DRD2/ISL1/PITX2/SIX3/NR0B1	14	3.20713
BP	GO:0051154	negative regulation of striated muscle cell differentiation	14/2423	42/18670	0.000558268	0.00561111	0.00411455	PI16/ANKRD2/CAV3/BDNF/TRIM72/G6PD/DKK1/RGS2/FZD7/RGS4/BHLHE41/TMEM119/CEACAM5/NKX2-5	14	3.74166
BP	GO:2001222	regulation of neuron migration	14/2423	42/18670	0.000558268	0.00561111	0.00411455	SOX14/CAMK2A/CTNNA2/ADGRG1/NEXMIF/FLNA/NKX6-1/GPR173/ERBB4/COL3A1/SEMA6A/FLRT2/SEMA3A/NRG3	14	2.13809
BP	GO:0002717	positive regulation of natural killer cell mediated immunity	12/2423	33/18670	0.000562706	0.00563659	0.00413323	SLAMF6/VAV1/IL12A/ULBP2/ULBP3/SH2D1A/RASGRP1/CRTAM/KIR2DL4/IL12B/ULBP1/RAET1L	12	3.4641
BP	GO:0035115	embryonic forelimb morphogenesis	12/2423	33/18670	0.000562706	0.00563659	0.00413323	RSPO2/TBX3/TBX5/RUNX2/HOXA11/TWIST1/EN1/TFAP2A/CRABP2/MSX2/SHOX2/WNT9A	12	2.3094
BP	GO:0090287	regulation of cellular response to growth factor stimulus	58/2423	292/18670	0.00056502	0.0056502	0.00414321	CIDEA/GREM2/MT3/HJV/NIBAN2/ADAMTS3/SMOC2/ADGRA2/DCN/NBL1/TGFB3/GREM1/CAV3/CRB2/GATA3/TGFB1/PRKCB/RUNX2/SFRP1/FGFBP1/NTRK3/EMILIN1/HTRA4/ADAMTS12/FGF1/CHST11/HHIP/SOST/MYOF/DKK1/FGF10/SLIT2/IL1B/FZD1/SHISA2/RASL11B/SFRP4/CHRDL1/WNT1/FGFR1/TFAP2B/HTRA3/SEMA6A/FGF4/FOXD1/SFRP2/NOG/FOLR1/SULF1/SOX11/MSX2/CER1/FBN2/PMEPA1/CREB3L1/ITGA3/VEPH1/SFRP5	58	6.56532
BP	GO:0050770	regulation of axonogenesis	40/2423	183/18670	0.000574038	0.0057307	0.00420224	UST/MT3/TNR/TBR1/PLXNA3/EPHA7/LIMK1/ISLR2/SEMA6D/PTPRO/POU3F2/SEMA3D/BDNF/TRIM46/CHODL/KEL/LRRC4C/NTRK3/SEMA4D/GRIN1/SEMA4A/NKX6-1/SPP1/SLIT2/DBN1/OLFM1/CRABP2/SEMA6A/L1CAM/PLXNB3/SHOX2/SEMA3A/NTRK2/SLITRK1/EPHB3/SEMA3E/LPAR3/SEMA3C/EFNA5/NEFL	40	5.37587
BP	GO:0060415	muscle tissue morphogenesis	22/2423	82/18670	0.000584395	0.00581448	0.00426368	MYL2/TBX1/MYH6/TGFB1/TBX20/FOXC2/ANKRD1/TNNI3/TGFB2/MYH7/FZD1/COL3A1/WNT2/MYBPC2/NOG/FZD2/SHOX2/ISL1/XIRP2/VANGL2/NKX2-5/COL11A1	22	4.69042
BP	GO:1905954	positive regulation of lipid localization	22/2423	82/18670	0.000584395	0.00581448	0.00426368	CIDEA/APOC4/ABCB4/ADIPOQ/CYP4A11/FITM1/PON1/C1QTNF1/IKBKE/MYB/HILPDA/RETN/TNFRSF11A/PLTP/SPP1/CYP19A1/IL1B/PLA2R1/GAL/ABCA12/ATP8A2/TAC1	22	1.70561
BP	GO:0007584	response to nutrient	46/2423	219/18670	0.000589637	0.0058568	0.00429471	CYP1A1/ALDH3A1/ASCL1/P2RX2/SERPINC1/GCGR/ADIPOQ/P2RX3/POR/LTA/PDX1/CCL28/P2RX1/TNFRSF11B/STC2/CD3E/TGFB1/P2RX5/TRPC3/SFRP1/CYBB/HPCA/PENK/GRIN1/P2RY12/PTGS2/P2RY4/PHEX/BCL11A/SPP1/GSTP1/IL1B/CYP26B1/TNC/SLC6A19/COL1A1/LEP/SFRP2/FOLR1/FGF23/PKM/POSTN/SST/GIPR/BMP7/CYP24A1	46	4.12837
BP	GO:0044282	small molecule catabolic process	82/2423	445/18670	0.000593755	0.00588782	0.00431745	CYP1A1/GCK/ABHD1/DCXR/GADL1/GLUL/HPD/CTH/PRODH/SULT1B1/AASS/ADH4/TAT/IDO2/ADH7/MT3/ACADL/CYP39A1/GLS2/AMACR/PCK2/SORD/CYP7A1/HGD/ALDOB/DAO/ADIPOQ/ALDH6A1/EHHADH/UROC1/AADAT/GPT2/CYP4A11/LDHD/ALDH2/HAAO/GSTZ1/HAO1/PON1/AMDHD1/SULT2A1/MAT1A/UPB1/CDO1/GCDH/APOBEC3A/TRERF1/ENTPD2/PGM2L1/TGFB1/HK3/RENBP/FUT8/CRABP1/GLYATL2/APOBEC3C/INPP5J/NT5C1A/TWIST1/MIOX/ALDH1L2/TKTL1/BCAT1/CEMIP/FUT9/FUT7/SULT1C4/…	82	-0.883452
BP	GO:0030203	glycosaminoglycan metabolic process	36/2423	160/18670	0.000600838	0.00594741	0.00436115	UST/CSGALNACT1/DCN/OGN/TGFB1/HS3ST5/CHST1/XYLT1/HPSE/PGLYRP3/OMD/PRELP/CHST6/CHST11/ITIH6/HS3ST1/CHST3/ACAN/GPC4/CEMIP/HS6ST2/B3GNT7/IL1B/HAS1/GPC2/HGF/FMOD/B3GNT3/LUM/HAS2/CHST5/VCAN/PGLYRP4/GALNT5/HS3ST6/ITIH5	36	5.66667
BP	GO:0045089	positive regulation of innate immune response	72/2423	381/18670	0.000604535	0.00594741	0.00436115	ESR1/NLRP6/HPX/MUCL1/SLAMF6/S100A9/VAV1/PYHIN1/ADAM8/BIRC3/FFAR2/IL12A/HCK/TRIM6/ICAM3/CLEC4E/IKBKE/ULBP2/ITGB2/TREML4/CLEC7A/MUC15/ULBP3/SH2D1A/SMPDL3B/MUC12/FCRL3/ITGAM/RASGRP1/TLR7/FPR2/PGLYRP3/CRTAM/HAVCR2/S100A14/MARCO/CTSK/CGAS/KIR2DL4/SYK/IL12B/PTPN22/MUC21/MNDA/ZBP1/INAVA/CLEC4C/ACOD1/TLR8/CARD11/MUC20/ULBP1/TNIP3/REG3G/TYRO3/GBP5/MUC5B/RAET1L/AIM2/BPIFB1/CLEC6A/IRF4/PGLYRP4/PSMA8/TLR10/M…	72	7.77817
BP	GO:0043303	mast cell degranulation	15/2423	47/18670	0.000605792	0.00594741	0.00436115	IL13/LGALS9/IL13RA2/FGR/PIK3CG/CD84/PIK3CD/RAC2/RASGRP1/ADORA2B/SYK/ADGRE2/UNC13D/CRHR1/CHGA	15	3.35659
BP	GO:0043370	regulation of CD4-positive, alpha-beta T cell differentiation	15/2423	47/18670	0.000605792	0.00594741	0.00436115	LGALS9/CD86/NCKAP1L/IL12RB1/SASH3/GATA3/CCL19/IL2/MYB/JAK3/IL18/IFNG/IL12B/CD80/IRF4	15	3.87298
BP	GO:0048806	genitalia development	15/2423	47/18670	0.000605792	0.00594741	0.00436115	ESR1/TBX3/SRD5A2/AR/ROR2/TIFAB/PDGFRA/BMP5/FGF10/CYP19A1/SYCP2/TYRO3/FOXF2/LHX1/STRA6	15	1.80739
BP	GO:0061383	trabecula morphogenesis	15/2423	47/18670	0.000605792	0.00594741	0.00436115	GREM1/CAV3/SFRP1/SEMA4D/BMP5/TGFB2/WNT10B/MMP2/COL1A1/NOG/MSX2/FBN2/OVOL2/NKX2-5/BMP7	15	3.87298
BP	GO:0044344	cellular response to fibroblast growth factor stimulus	33/2423	143/18670	0.000622266	0.00607137	0.00445205	CPS1/SPRED1/FGF19/SMOC2/TBX1/GATA3/IQGAP1/SHCBP1/RUNX2/FGF20/FGF7/SFRP1/FGFBP1/FGF1/HHIP/SNCA/ANOS1/CXCL8/FGF10/SHISA2/FGFR1/COL1A1/FLRT2/FGF4/NOG/SULF1/FGF23/GALNT3/LHX1/POSTN/CREB3L1/FGF5/ESRP1	33	5.39641
BP	GO:0003211	cardiac ventricle formation	6/2423	10/18670	0.000624571	0.00607137	0.00445205	TBX5/SMARCD3/SOX4/SOX11/HAND2/NKX2-5	6	2.44949
BP	GO:0030432	peristalsis	6/2423	10/18670	0.000624571	0.00607137	0.00445205	DRD1/P2RX2/P2RX3/GDNF/TIFAB/DRD2	6	-0.816497
BP	GO:0045741	positive regulation of epidermal growth factor-activated receptor activity	6/2423	10/18670	0.000624571	0.00607137	0.00445205	EPGN/ADORA1/NCF1/TGFA/ADRA2A/EREG	6	2.44949
BP	GO:0048703	embryonic viscerocranium morphogenesis	6/2423	10/18670	0.000624571	0.00607137	0.00445205	MTHFD1/TBX1/HOXA2/FOXC2/CHST11/LHX1	6	1.63299
BP	GO:0060513	prostatic bud formation	6/2423	10/18670	0.000624571	0.00607137	0.00445205	AR/FGF10/GLI2/NOG/SULF1/BMP7	6	1.63299
BP	GO:0050805	negative regulation of synaptic transmission	20/2423	72/18670	0.00063059	0.00611982	0.00448758	DRD1/ADCY8/DRD5/KCNB1/ADIPOQ/TNR/CNR2/NLGN3/CELF4/ADORA1/PTGS2/CD38/SNCA/GRID2IP/SLC24A2/IL1B/SYT4/DRD2/NPY5R/GRID2	20	1.78885
BP	GO:0006590	thyroid hormone generation	8/2423	17/18670	0.000649852	0.00621766	0.00455932	CGA/GATA3/DUOX1/SLC5A5/FOXE1/DUOXA1/DUOXA2/DUOX2	8	2.12132
BP	GO:0010715	regulation of extracellular matrix disassembly	8/2423	17/18670	0.000649852	0.00621766	0.00455932	TGFB1/FSCN1/IL6/CARMIL2/MELTF/FAP/PDPN/DDR1	8	2.82843
BP	GO:0042249	establishment of planar polarity of embryonic epithelium	8/2423	17/18670	0.000649852	0.00621766	0.00455932	PTK7/SFRP1/FZD1/FOXF2/CTHRC1/SFRP2/FZD2/VANGL2	8	2.82843
BP	GO:0048535	lymph node development	8/2423	17/18670	0.000649852	0.00621766	0.00455932	RIPK3/LTA/TGFB1/IL7R/TNFRSF11A/LTB/CXCR5/PDPN	8	2.82843
BP	GO:0061687	detoxification of inorganic compound	8/2423	17/18670	0.000649852	0.00621766	0.00455932	MT1B/MT1X/MT1M/MT2A/MT1G/MT3/MT1E/MT1H	8	-2.82843
BP	GO:0097501	stress response to metal ion	8/2423	17/18670	0.000649852	0.00621766	0.00455932	MT1B/MT1X/MT1M/MT2A/MT1G/MT3/MT1E/MT1H	8	-2.82843
BP	GO:0031294	lymphocyte costimulation	17/2423	57/18670	0.000650778	0.00621766	0.00455932	CD86/VAV1/LCK/CD3E/TNFSF13B/CCL19/CD5/BTLA/CD24/CTLA4/CCR7/ICOS/TNFRSF13C/CD80/CARD11/PDCD1/HHLA2	17	4.12311
BP	GO:0042743	hydrogen peroxide metabolic process	17/2423	57/18670	0.000650778	0.00621766	0.00455932	CYP1A2/CYP1A1/MT3/HP/HBD/HBM/HBQ1/MMP3/RAC2/DUOX1/CYBB/SNCA/APOA4/HBE1/DUOXA1/DUOXA2/DUOX2	17	1.21268
BP	GO:0010830	regulation of myotube differentiation	18/2423	62/18670	0.000653275	0.00621766	0.00455932	ANKRD2/NIBAN2/CAV3/TBX1/CD53/BDNF/CXCL9/TRIM72/ADGRB1/HDAC9/CYP26B1/MMP14/BHLHE41/TMEM119/SHOX2/MYOD1/CEACAM5/NKX2-5	18	4.24264
BP	GO:0032835	glomerulus development	18/2423	62/18670	0.000653275	0.00621766	0.00455932	ADIPOQ/JAG1/PTPRO/IQGAP1/FOXC2/CD24/PDGFRA/NPHS2/KIRREL3/BASP1/NOG/SULF1/LHX1/VANGL2/BMP7/SERPINB7/FOXJ1/PROM1	18	3.77124
BP	GO:0046635	positive regulation of alpha-beta T cell activation	18/2423	62/18670	0.000653275	0.00621766	0.00455932	LGALS9/CD86/ZAP70/NCKAP1L/PRKCQ/IL12RB1/IL12A/SASH3/CD3E/CCL19/MYB/PTPRC/IL18/IFNG/GLI3/SYK/IL12B/CD80	18	4.24264
BP	GO:0050433	regulation of catecholamine secretion	18/2423	62/18670	0.000653275	0.00621766	0.00455932	SYT9/KCNB1/CHRNA4/GDNF/SNCG/FGF20/SYT3/OXTR/P2RY12/SNCA/CHRNA6/SYT4/DRD2/ADRA2A/CRHR1/SYT8/CHGA/SYT13	18	2.35702
BP	GO:0045995	regulation of embryonic development	31/2423	132/18670	0.000654712	0.0062183	0.00455979	NKD1/AR/ADIPOQ/IGF1/GDNF/PTK7/NIBAN2/CRB2/GATA3/IL10/SFRP1/PHLDB1/GPR161/NRK/DKK1/COL5A1/FZD1/WNT1/FGFR1/FZD7/WNT2/DMRT2/SFRP2/FZD2/SULF1/TENM4/LHX1/VANGL2/CDX2/BMP7/LAMA1	31	3.77171
BP	GO:0016051	carbohydrate biosynthetic process	45/2423	214/18670	0.000655443	0.0062183	0.00455979	C1QTNF3/GCK/B3GALT1/GNMT/PPP1R3G/GYS2/G6PC/PCK2/SORD/PFKFB1/LEPR/ALDOB/ADIPOQ/IGF1/RGN/PPARGC1A/CSGALNACT1/C1QTNF2/AKR1B1/PGM2L1/B3GALNT1/PLEK/ST6GALNAC1/TGFB1/FUT8/B3GNT9/CHST8/P2RY6/B3GNT8/PTAFR/ISYNA1/CHST11/SNCA/SLC2A1/G6PD/B3GNT7/HAS1/B3GNT3/HAS2/LEP/FUT3/ST6GALNAC5/ENO2/B3GALT2/B3GALT5	45	1.93793
BP	GO:0045861	negative regulation of proteolysis	69/2423	363/18670	0.000658455	0.00622442	0.00456428	SMR3A/SMR3B/OPRPN/CSN2/COL7A1/SERPINC1/MT3/RAG1/LPA/C4BPA/WFDC5/POR/FETUB/C4BPB/CARD17/PI16/TNFAIP8/BIRC3/CRB2/CRYAB/SPINK4/AQP1/SERPINI2/PI3/LXN/GAS1/RENBP/IL10/WFDC10B/CR1/COL28A1/SERPINB5/CST2/MICAL1/TFPI2/PTGS2/SERPINE2/SNCA/ITIH6/NLRP7/CD27/COL6A3/ANOS1/TIMP2/PRKCG/DPEP1/HGF/PCSK1N/WNT1/MAP1A/LCN1/PLAUR/TFAP2B/ANXA8/SFRP2/MMP9/CST6/PAPLN/SPINK13/WNT9A/BIRC7/CST8/SPINT2/ANXA8L1/SERPINB3/SPINT…	69	4.93582
BP	GO:0032350	regulation of hormone metabolic process	13/2423	38/18670	0.000659242	0.00622442	0.00456428	PPARGC1A/POR/TRERF1/GATA3/STC2/IFNG/GNB3/BMP5/TNF/IL1B/GAL/DUOXA1/DUOXA2	13	2.49615
BP	GO:0032620	interleukin-17 production	13/2423	38/18670	0.000659242	0.00622442	0.00456428	SLAMF6/NCKAP1L/PRKCQ/IL12A/LY9/TGFB1/IL2/IL6/IL18/IFNG/IL12B/OSM/SPHK1	13	3.60555
BP	GO:0045921	positive regulation of exocytosis	23/2423	88/18670	0.00066216	0.00624202	0.00457718	CACNA1I/IL13/EXPH5/SYT9/KCNB1/FGR/ITGB2/ITGAM/IFNG/PTAFR/ADORA2B/SYK/SNCA/RAB27B/CACNA1G/UNC13D/SYT4/CD177/NLGN1/CDK5R2/CRHR1/CADPS/CFTR	23	2.71069
BP	GO:0061217	regulation of mesonephros development	10/2423	25/18670	0.00067882	0.0063889	0.00468489	GDNF/HNF1B/GATA3/HOXB7/TGFB1/BASP1/NOG/TACSTD2/LHX1/SIX2	10	2.52982
BP	GO:0050673	epithelial cell proliferation	80/2423	434/18670	0.000680493	0.00639448	0.00468898	REG3A/ODAM/VEGFD/ESR1/GLUL/AR/LGR5/HTR2B/ANG/IGF1/RGN/EPGN/COL8A1/EHF/CCL11/UHRF1/HNF1B/TBX1/SOX2/LAMB1/GATA3/KRT2/ITGA4/PRKX/TGFB1/AREG/IL10/FGF7/EPPK1/SFRP1/FGFBP1/SERPINB5/IGFBP5/FGF1/DLX5/BCL11B/TWIST1/DLX6/SDR16C5/APELA/PTPRN/NKX6-1/BMP5/TNF/TGFB2/F3/GLI1/CCL26/FGF10/MMP14/HGF/WNT10B/FGFR1/REG3G/FZD7/HAS2/FAP/LEP/COL8A2/WNT2/CDH3/SFRP2/PLXNB3/NOG/TACSTD2/SULF1/SOX11/TGFA/ISL1/FOXN1/EYA1/PRL/…	80	6.4846
BP	GO:1901570	fatty acid derivative biosynthetic process	25/2423	99/18670	0.00068772	0.00645214	0.00473127	SLC27A5/CYP2C9/CYP2C8/ACSL6/ACSL5/ACSS3/GCDH/PTGS1/FAR1/FABP5/PTGES/SYK/PTGS2/ALOX5AP/IL1B/PTGIS/HACD1/PLA2G4A/ELOVL7/PTGDS/ALOX5/ELOVL4/PLA2G4F/SCD5/GGT6	25	2.2
BP	GO:0031290	retinal ganglion cell axon guidance	9/2423	21/18670	0.000694402	0.00650452	0.00476967	SLIT1/EPHA7/PTPRO/SLIT2/ISL2/ISL1/BMPR1B/EPHB3/EFNA5	9	3
BP	GO:0003009	skeletal muscle contraction	14/2423	43/18670	0.000729997	0.00680564	0.00499048	MYH3/STRIT1/CAV3/CCDC78/TNNI2/TNNI3/MYH7/JSRP1/CHRNA1/STAC/STAC2/CHRND/ATP8A2/TNNT1	14	2.67261
BP	GO:0050850	positive regulation of calcium-mediated signaling	14/2423	43/18670	0.000729997	0.00680564	0.00499048	P2RX2/P2RX3/IGF1/TREM2/ZAP70/HAP1/CD3E/P2RX5/P2RY6/TRAT1/SYK/TNF/C10orf71/TRDN	14	2.13809
BP	GO:1990573	potassium ion import across plasma membrane	14/2423	43/18670	0.000729997	0.00680564	0.00499048	SLC12A1/KCNJ8/KCNE2/ABCC9/KCNK9/FXYD2/KCNJ10/KCNH2/ATP1A4/KCNJ13/ATP1A3/ATP12A/HCN4/KCNJ16	14	1.60357
BP	GO:0061333	renal tubule morphogenesis	21/2423	78/18670	0.000733681	0.00682924	0.00500778	LGR5/GDNF/HNF1B/GATA3/ADAMTS16/HOXB7/TGFB1/FGF1/IRX2/GLI3/HOXA11/FMN1/KIF26B/WNT1/FOXD1/NOG/TACSTD2/EYA1/LHX1/HOXD11/SIX2	21	3.7097
BP	GO:0043266	regulation of potassium ion transport	26/2423	105/18670	0.000747543	0.00693839	0.00508783	ACTN2/LRRC52/DRD1/GCK/KCNE2/TREM2/LRRC26/CAV3/KCNS2/ANK2/KEL/ADORA1/FLNA/KCNE4/KCNIP1/KCNS1/KCNH2/LRRC38/ANK3/GAL/RGS4/MTNR1B/DRD2/DPP10/ADRA2A/WNK2	26	3.13786
BP	GO:0043010	camera-type eye development	61/2423	314/18670	0.000747753	0.00693839	0.00508783	CYP1A1/USH2A/MIP/COL8A1/JAG1/MAB21L2/CABP4/GRM6/GATA3/CRYAB/NHS/TGFB1/CRYGN/SMARCD3/FOXC2/CELF4/SLC17A8/TENM3/VAX2/EFEMP1/NTRK3/PITX3/GLI3/HPCA/CALB1/BCL11B/MITF/TWIST1/PDGFRA/SLITRK6/FOXL2/HCN1/TGFB2/MAB21L1/FGF10/MYH15/PTF1A/TFAP2A/TFAP2B/MTNR1B/FOXF2/RORB/COL8A2/WNT2/SOX11/FBN2/VAX1/WNT9A/BMPR1B/NTRK2/LHX1/ATP8A2/NDP/STRA6/BMP7/LAMA1/PITX2/SIX3/GRHL2/PROM1/WNT7B	61	7.04203
BP	GO:0034767	positive regulation of ion transmembrane transport	35/2423	156/18670	0.000749767	0.0069462	0.00509355	ACTN2/LRRC52/DRD1/IL13/FXYD1/KCNE2/RGN/TREM2/LRRC26/HAP1/NLGN3/CACNA2D1/CACNB3/CXCL9/ANK2/P2RY6/IFNG/PTAFR/FLNA/SNCA/TESC/CEMIP/G6PD/KCNH2/CD19/LRRC38/ANK3/GAL/STAC/STAC2/CALCR/WNK2/TRDN/HTR3A/CFTR	35	3.54965
BP	GO:0006801	superoxide metabolic process	20/2423	73/18670	0.00076415	0.00705736	0.00517507	TAFA4/MT3/RGN/ITGB2/TGFB1/CLEC7A/ITGAM/SOD3/FPR2/NCF2/DUOX1/CYBB/SYK/APOA4/NCF1/TNF/GSTP1/CD177/BMP7/DUOX2	20	3.1305
BP	GO:0060350	endochondral bone morphogenesis	20/2423	73/18670	0.00076415	0.00705736	0.00517507	COL7A1/POR/CSGALNACT1/COL14A1/COL12A1/VWA2/RUNX2/COL6A2/DLX5/HOXA11/COL6A3/MMP14/COL1A1/MMP16/TMEM119/CER1/SHOX2/BMPR1B/COMP/MMP13	20	3.57771
BP	GO:0007435	salivary gland morphogenesis	12/2423	34/18670	0.000767888	0.00705885	0.00517616	TGFB3/TGFB1/FGF7/TNF/TGFB2/FGF10/HGF/FGFR1/SEMA3A/SEMA3C/BMP7/LAMA1	12	3.4641
BP	GO:0021522	spinal cord motor neuron differentiation	12/2423	34/18670	0.000767888	0.00705885	0.00517616	LHX3/TBX20/OLIG2/GLI3/NKX6-1/ISL2/SOX4/GLI2/MNX1/ISL1/HOXC10/LBX1	12	2.88675
BP	GO:0048048	embryonic eye morphogenesis	12/2423	34/18670	0.000767888	0.00705885	0.00517616	VAX2/EFEMP1/TWIST1/FOXL2/TFAP2A/FOXF2/SOX11/FBN2/MFAP2/STRA6/BMP7/SIX3	12	3.4641
BP	GO:0002279	mast cell activation involved in immune response	15/2423	48/18670	0.000776692	0.00710667	0.00521122	IL13/LGALS9/IL13RA2/FGR/PIK3CG/CD84/PIK3CD/RAC2/RASGRP1/ADORA2B/SYK/ADGRE2/UNC13D/CRHR1/CHGA	15	3.35659
BP	GO:0010107	potassium ion import	15/2423	48/18670	0.000776692	0.00710667	0.00521122	SLC12A1/KCNJ8/KCNE2/ABCC9/KCNK9/FXYD2/KCNJ10/KCNH2/ATP1A4/KCNJ13/ATP1A3/WNK2/ATP12A/HCN4/KCNJ16	15	1.80739
BP	GO:0021517	ventral spinal cord development	15/2423	48/18670	0.000776692	0.00710667	0.00521122	ASCL1/LHX3/TBX20/OLIG2/GLI3/NKX6-1/ISL2/VSTM5/SOX4/GLI2/MNX1/ISL1/HOXC10/LHX1/LBX1	15	2.84019
BP	GO:0048588	developmental cell growth	48/2423	234/18670	0.000786987	0.00718976	0.00527215	MT3/ADRA1A/IGF1/TNR/PI16/SLIT3/PLXNA3/CAV3/SLIT1/EPHA7/LIMK1/ISLR2/ITGA4/SEMA6D/NLGN3/IQGAP1/SEMA3D/BDNF/TRIM46/SYT3/NTRK3/SEMA4D/SEMA4A/BCL11A/FOXL2/NKX6-1/SPP1/G6PD/SLIT2/DBN1/DCLK1/GAL/RGS2/OLFM1/CRABP2/RGS4/SYT4/SEMA6A/RASAL1/L1CAM/DDR1/UNC13A/SEMA3A/POSTN/SEMA3E/LPAR3/SEMA3C/EFNA5	48	5.7735
BP	GO:0050918	positive chemotaxis	19/2423	68/18670	0.000788738	0.00719465	0.00527574	VEGFD/SAA2/SAA1/GDNF/CCL16/SAA4/CORO1A/ARTN/CCR4/FGF7/FPR2/NTRK3/GPNMB/CXCL8/F3/FGF10/HGF/PLXNB3/SCG2	19	1.60591
BP	GO:0010043	response to zinc ion	16/2423	53/18670	0.000802443	0.00727738	0.0053364	MT1B/MT1X/MT1M/MT2A/MT1G/MT3/MT1E/MT1H/SLC30A2/HAAO/CPS1/CRIP1/AANAT/KRT14/APOBEC1/SLC30A8	16	-1.5
BP	GO:0072676	lymphocyte migration	27/2423	111/18670	0.000802841	0.00727738	0.0053364	SAA1/CCL16/RIPK3/CCR6/ZAP70/CCL11/ADAM8/GPR15/APOD/PIK3CG/GATA3/ITGA4/CXCR3/SPN/PIK3CD/MYO1G/CCL19/ARTN/PADI2/GPR183/CCR7/CCL22/CCL26/GCSAM/AIRE/CCL7/CXCL14	27	4.42635
BP	GO:0098661	inorganic anion transmembrane transport	27/2423	111/18670	0.000802841	0.00727738	0.0053364	SLC12A1/FXYD1/SLC4A1/CLCN1/GRM5/CLCA4/BEST1/GABRG1/PTAFR/CLCNKB/CLDN4/BEST3/CLIC6/GABRA4/GABRA2/GABRR1/GABRP/SLC13A1/CLIC3/SLC4A11/ANO9/FXYD3/CLCA1/TTYH1/SLC26A9/CFTR/GABRA5	27	3.65655
BP	GO:0002822	regulation of adaptive immune response based on somatic recombination of immune receptors built from immunoglobulin superfamily domains	33/2423	145/18670	0.000805094	0.00727738	0.0053364	C4BPA/HPX/C4BPB/RIPK3/LTA/LILRB1/PRKCQ/IL12RB1/IL12A/CD1C/SASH3/GATA3/TNFSF13B/TGFB1/CCL19/IL2/IL10/IL6/JAK3/CR1/PTPRC/IL18/IL7R/HAVCR2/IL12B/TNFRSF13C/CD1E/TNF/IL1B/CD80/CD1B/CD1A/FOXJ1	33	4.7001
BP	GO:0031646	positive regulation of neurological system process	18/2423	63/18670	0.000805183	0.00727738	0.0053364	CUX2/P2RX3/TNR/NLGN3/CACNB3/PTAFR/GRIN1/IGSF9B/S100B/HGF/ZNF488/RGS4/MTNR1B/TENM4/NRXN1/CHRNA7/NLGN1/IGSF11	18	2.82843
BP	GO:0046637	regulation of alpha-beta T cell differentiation	18/2423	63/18670	0.000805183	0.00727738	0.0053364	LGALS9/CD86/ZAP70/NCKAP1L/IL12RB1/SASH3/GATA3/CCL19/IL2/MYB/JAK3/IL18/IFNG/GLI3/SYK/IL12B/CD80/IRF4	18	4.24264
BP	GO:0032722	positive regulation of chemokine production	17/2423	58/18670	0.000810791	0.00731689	0.00536537	ADIPOQ/LGALS9/FFAR2/CLEC7A/CHIA/IL6/TLR7/HAVCR2/IFNG/ADORA2B/SYK/TWIST1/TNF/IL1B/MCOLN2/ALOX15B/POSTN	17	3.63803
BP	GO:0043271	negative regulation of ion transport	35/2423	157/18670	0.000846691	0.00762924	0.00559441	ACTN2/KCNE2/LILRB1/CAV3/CBARP/TGFB1/CACNB3/KEL/ADORA1/GEM/KCNE4/PTGS2/TWIST1/SERPINE2/SNCA/RRAD/BEST3/KCNH2/PLA2R1/SLN/SFRP4/ANK3/RGS2/RGS4/MTNR1B/LEP/MMP9/DRD2/NPY5R/ADRA2A/WNK2/TRDN/ANO9/CRHR1/PRKG2	35	5.23996
BP	GO:0044070	regulation of anion transport	24/2423	95/18670	0.000865889	0.00779036	0.00571256	ACE2/ABCB4/CYP4A11/GRM5/ADORA1/PTAFR/SYK/SV2A/SNCA/TNFRSF11A/IL1B/PLA2R1/SFRP4/FGFR1/RGS2/RGS4/SYT4/LEP/FGF23/NPY5R/ATP8A2/ANO9/PRKG2/CFTR	24	3.67423
BP	GO:0021510	spinal cord development	26/2423	106/18670	0.000870284	0.00781545	0.00573096	ASCL1/LHX3/GDNF/FOXB1/NEUROG3/PLXDC1/TBX20/LHX5/OLIG2/GLI3/HOXB8/NKX6-1/ISL2/VSTM5/WNT1/SOX4/RFX4/GLI2/NOG/SOX11/MNX1/ISL1/HOXC10/LHX1/LBX1/NEFL	26	3.92232
BP	GO:0042417	dopamine metabolic process	13/2423	39/18670	0.000872637	0.00781545	0.00573096	DRD1/DAO/ITGB2/ITGAM/SNCAIP/SLC6A3/SNCA/TGFB2/GRIN2A/SNCB/MOXD1/DRD2/TACR3	13	2.49615
BP	GO:0045684	positive regulation of epidermis development	13/2423	39/18670	0.000872637	0.00781545	0.00573096	KRT2/HPSE/TNF/TGFB2/ATOH1/SFRP4/WNT10B/GAL/ALOX15B/KRT17/MSX2/FOXN1/OVOL2	13	3.60555
BP	GO:0043372	positive regulation of CD4-positive, alpha-beta T cell differentiation	11/2423	30/18670	0.000877582	0.00782423	0.0057374	LGALS9/CD86/NCKAP1L/IL12RB1/SASH3/CCL19/MYB/IL18/IFNG/IL12B/CD80	11	3.31662
BP	GO:0045940	positive regulation of steroid metabolic process	11/2423	30/18670	0.000877582	0.00782423	0.0057374	CYP7A1/APOA5/APOC1/PPARGC1A/POR/CGA/IFNG/FGF1/APOA4/TNF/IL1B	11	-0.301511
BP	GO:0045954	positive regulation of natural killer cell mediated cytotoxicity	11/2423	30/18670	0.000877582	0.00782423	0.0057374	SLAMF6/VAV1/IL12A/ULBP2/ULBP3/SH2D1A/RASGRP1/CRTAM/IL12B/ULBP1/RAET1L	11	3.31662
BP	GO:0021675	nerve development	21/2423	79/18670	0.000879014	0.00782521	0.00573812	PLXNA3/EGR2/TBX1/HOXB3/ITGA4/BDNF/HOXA1/GLI3/TIFAB/SERPINE2/SLITRK6/PRKCG/NTF4/TFAP2A/SULF1/ISL1/UNC13A/LPAR1/SEMA3A/NPTX1/GABRA5	21	4.58258
BP	GO:0002285	lymphocyte activation involved in immune response	39/2423	181/18670	0.000892712	0.00793522	0.00581878	CCR6/LGALS9/ITM2A/SLAMF6/CD86/KLRF2/LILRB1/IL12RB1/CD1C/GATA3/DOCK10/CLEC4E/LY9/CORO1A/SPN/TGFB1/CCL19/IL2/MYB/IL10/GPR183/IL6/JAK3/PTPRC/PTGER4/PGLYRP3/IL18/HAVCR2/IFNG/IL12B/SEMA4A/CD80/CD19/UNC13D/GAPT/AICDA/IRF4/PGLYRP4/CDH17	39	6.245
BP	GO:0051384	response to glucocorticoid	33/2423	146/18670	0.000913037	0.00810127	0.00594055	ALDH3A1/TAT/PCK2/PFKFB1/ADIPOQ/CPS1/CDO1/SLIT3/PDX1/AANAT/AQP1/TGFB1/AREG/IL10/IL6/NTRK3/PTAFR/PTGS2/FIBIN/TRIM63/S100B/UCN3/TNF/GSTP1/SLIT2/SCGB1A1/ISL1/CALCR/MYOD1/SSTR3/ANXA3/NEFL/WNT7B	33	3.30748
BP	GO:0002523	leukocyte migration involved in inflammatory response	7/2423	14/18670	0.000915499	0.00810127	0.00594055	SELE/CCR6/S100A9/ADAM8/FFAR2/ITGB2/SLAMF8	7	1.88982
BP	GO:0010752	regulation of cGMP-mediated signaling	7/2423	14/18670	0.000915499	0.00810127	0.00594055	PDE11A/PDE10A/PDZD3/CGAS/ADORA2B/MTNR1B/RUNDC3A	7	1.88982
BP	GO:0072078	nephron tubule morphogenesis	20/2423	74/18670	0.000921374	0.0081411	0.00596975	GDNF/HNF1B/GATA3/ADAMTS16/HOXB7/TGFB1/FGF1/IRX2/GLI3/HOXA11/FMN1/KIF26B/WNT1/FOXD1/NOG/TACSTD2/EYA1/LHX1/HOXD11/SIX2	20	4.02492
BP	GO:0042475	odontogenesis of dentin-containing tooth	23/2423	90/18670	0.000927081	0.00816339	0.0059861	KLK4/RSPO2/ODAM/AMBN/TBX1/ODAPH/TNFRSF11B/RUNX2/GLI3/BCL11B/PDGFRA/CSF3R/FGF10/WNT10A/TNC/FGF4/GLI2/ITGB4/MSX2/AMTN/HAND2/LHX8/BMP7	23	3.12772
BP	GO:0045778	positive regulation of ossification	23/2423	90/18670	0.000927081	0.00816339	0.0059861	IGF1/JAG1/TGFB3/TGFB1/RUNX2/IL6/GLI3/CCN4/TGFB2/HGF/WNT10B/TFAP2A/CTHRC1/SFRP2/TMEM119/SOX11/MSX2/FBN2/BMPR1B/TAC1/BMP7/NELL1/WNT7B	23	4.3788
BP	GO:0009100	glycoprotein metabolic process	77/2423	419/18670	0.000928034	0.00816339	0.0059861	B3GALT1/UST/MT3/IGF1/APCS/MUCL1/ITM2A/CSGALNACT1/ST8SIA2/DCN/ST8SIA1/GALNT13/B3GALNT1/GALNT6/ST6GALNAC1/GAL3ST1/CCL19/CELA1/MUC15/GBGT1/PTX3/HS3ST5/FUT8/MUC12/XYLT1/JAK3/B3GNT9/TMTC2/CHST8/HPSE/B3GNT8/ADAMTS12/CCR7/CHST11/MUC21/MGAT3/HS3ST1/CHST3/ACAN/GALNT7/GAL3ST4/HS6ST2/B3GNT7/FUT9/FUT7/MUC20/FUT4/GFPT2/B3GNT3/ST6GAL2/BACE2/GCNT1/NCCRP1/TUSC3/MUC5B/LEP/FOXL1/SULF1/GALNT3/FUT3/ST6GALNAC5/GCNT3/…	77	7.63536
BP	GO:0014002	astrocyte development	14/2423	44/18670	0.000944309	0.00829423	0.00608204	DRD1/MT3/TREM2/ROR1/TSPAN2/POU3F2/PLP1/IL6/FPR2/IFNG/ROR2/TNF/IL1B/BACE2	14	2.67261
BP	GO:0042698	ovulation cycle	19/2423	69/18670	0.000958012	0.00840212	0.00616116	ESR1/SLIT3/TGFB3/PTX3/OXTR/RETN/PDGFRA/PTPRN/TGFB2/SLIT2/HAS1/TYRO3/HAS2/LEP/NPY5R/BMPR1B/NHLH2/MMP7/EREG	19	3.90007
BP	GO:0042044	fluid transport	10/2423	26/18670	0.000975778	0.00854042	0.00626257	AQP6/AQP8/AQP9/MIP/AQP1/AQP10/PDZD3/HAS2/SLC4A11/CFTR	10	0.632456
BP	GO:0050727	regulation of inflammatory response	87/2423	485/18670	0.000979691	0.00854042	0.00626257	C1QTNF3/ACE2/ESR1/CFHR4/FABP4/SAA1/SELE/C8A/CFHR5/C6/NLRP6/ADIPOQ/IGF1/C4BPA/CFHR2/KLKB1/C4BPB/APCS/TREM2/S100A9/LTA/CNR2/FFAR4/ADAM8/BIRC3/FFAR2/APOD/PIK3CG/HCK/GATA3/C2CD4A/CLEC7A/MMP3/IL2/SMPDL3B/IL10/IL6/CR1/TLR7/FPR2/ADORA1/PTPRC/MMP8/PTGER4/IL18/ADAMTS12/CCR7/SLAMF8/ADORA2B/TAFA3/IL12B/PTGS2/OSM/CCN4/SNCA/CR1L/TNFRSF11A/NLRP7/ABCC1/STAP1/IL2RA/TNF/CYP19A1/ACOD1/GSTP1/ABR/IL1B/SIGLEC10/MAPK1…	87	5.46777
BP	GO:0071772	response to BMP	37/2423	170/18670	0.000981768	0.00854042	0.00626257	TMEM100/GREM2/HJV/NBL1/GREM1/CRB2/GATA3/MYH6/RUNX2/SFRP1/ADAMTS12/DLX5/ROR2/SOST/BMP5/DKK1/FZD1/SFRP4/CHRDL1/WNT1/TFAP2B/HTRA3/FOXD1/SFRP2/NOG/SULF1/SOX11/MSX2/CER1/BMPR1B/COMP/SPINT2/ITGA3/NKX2-5/BMP7/SPINT1/SFRP5	37	5.09637
BP	GO:0071773	cellular response to BMP stimulus	37/2423	170/18670	0.000981768	0.00854042	0.00626257	TMEM100/GREM2/HJV/NBL1/GREM1/CRB2/GATA3/MYH6/RUNX2/SFRP1/ADAMTS12/DLX5/ROR2/SOST/BMP5/DKK1/FZD1/SFRP4/CHRDL1/WNT1/TFAP2B/HTRA3/FOXD1/SFRP2/NOG/SULF1/SOX11/MSX2/CER1/BMPR1B/COMP/SPINT2/ITGA3/NKX2-5/BMP7/SPINT1/SFRP5	37	5.09637
BP	GO:0045669	positive regulation of osteoblast differentiation	18/2423	64/18670	0.000986341	0.00854042	0.00626257	IGF1/JAG1/RUNX2/IL6/GLI3/CCN4/HGF/WNT10B/CTHRC1/SFRP2/TMEM119/SOX11/MSX2/FBN2/BMPR1B/BMP7/NELL1/WNT7B	18	3.77124
BP	GO:0050432	catecholamine secretion	18/2423	64/18670	0.000986341	0.00854042	0.00626257	SYT9/KCNB1/CHRNA4/GDNF/SNCG/FGF20/SYT3/OXTR/P2RY12/SNCA/CHRNA6/SYT4/DRD2/ADRA2A/CRHR1/SYT8/CHGA/SYT13	18	2.35702
BP	GO:0001913	T cell mediated cytotoxicity	15/2423	49/18670	0.000986764	0.00854042	0.00626257	RIPK3/LILRB1/IL12RB1/IL12A/CD1C/ULBP2/ULBP3/PTPRC/IL7R/IL12B/CD1E/ULBP1/CD1B/RAET1L/CD1A	15	3.87298
BP	GO:0002448	mast cell mediated immunity	15/2423	49/18670	0.000986764	0.00854042	0.00626257	IL13/LGALS9/IL13RA2/FGR/PIK3CG/CD84/PIK3CD/RAC2/RASGRP1/ADORA2B/SYK/ADGRE2/UNC13D/CRHR1/CHGA	15	3.35659
BP	GO:0002704	negative regulation of leukocyte mediated immunity	15/2423	49/18670	0.000986764	0.00854042	0.00626257	C4BPA/C4BPB/LGALS9/IL13RA2/LILRB1/CD84/JAK3/CR1/PTPRC/IL7R/HAVCR2/KIR2DL4/ABR/SERPINB4/FOXJ1	15	2.84019
BP	GO:0045682	regulation of epidermis development	22/2423	85/18670	0.000988386	0.00854197	0.0062637	REG3A/DKK4/MYCL/KRT2/HPSE/CTSK/KRT36/TNF/TGFB2/ATOH1/SFRP4/WNT10B/REG3G/GAL/CDH3/ALOX15B/KRT17/MSX2/FOXN1/OVOL2/ESRP1/GRHL2	22	3.41121
BP	GO:0001654	eye development	68/2423	362/18670	0.000993996	0.00857792	0.00629007	CYP1A1/NKD1/USH2A/MIP/COL8A1/JAG1/FASLG/MAB21L2/CABP4/SOX2/GRM6/GATA3/CRYAB/NHS/TGFB1/CRYGN/SMARCD3/FOXC2/CELF4/SLC17A8/FSCN2/TENM3/VAX2/EFEMP1/NTRK3/PITX3/GLI3/HPCA/CALB1/BCL11B/MITF/TWIST1/PDGFRA/SLITRK6/FOXL2/HCN1/TGFB2/MAB21L1/FGF10/COL5A1/CHRDL1/MYH15/PTF1A/TFAP2A/TFAP2B/MTNR1B/FOXF2/RORB/COL8A2/WNT2/SOX11/FBN2/VAX1/MFAP2/WNT9A/BMPR1B/NTRK2/LHX1/ATP8A2/NDP/STRA6/BMP7/LAMA1/PITX2/SIX3/GRHL2/P…	68	7.27607
BP	GO:0042130	negative regulation of T cell proliferation	17/2423	59/18670	0.0010032	0.00861547	0.0063176	LGALS9/CD86/PDE5A/LILRB1/SPN/TNFRSF21/TGFB1/IL10/CTLA4/HAVCR2/GPNMB/IL2RA/CD80/SCGB1A1/PLA2G2D/FOXJ1/VTCN1	17	4.12311
BP	GO:0006636	unsaturated fatty acid biosynthetic process	16/2423	54/18670	0.00100479	0.00861547	0.0063176	PTGS1/FABP5/PTGES/PTGS2/ALOX5AP/ALOX12B/IL1B/PTGIS/ALOX15B/ELOVL7/PTGDS/ALOX5/ELOVL4/PLA2G4F/SCD5/ALOXE3	16	4
BP	GO:0021515	cell differentiation in spinal cord	16/2423	54/18670	0.00100479	0.00861547	0.0063176	ASCL1/LHX3/TBX20/LHX5/OLIG2/GLI3/NKX6-1/ISL2/WNT1/SOX4/GLI2/MNX1/ISL1/HOXC10/LHX1/LBX1	16	3
BP	GO:0002237	response to molecule of bacterial origin	65/2423	343/18670	0.00100562	0.00861547	0.0063176	CYP1A2/CYP1A1/REN/IL13/SELE/PPARGC1A/CPS1/CARD17/TREM2/LGALS9/CD86/LTA/CNR2/DCN/FASLG/LILRB1/IL12A/HCK/TRIM6/PTGFR/TGFB1/CXCL9/IL10/IL6/CCR5/LDOC1/CSF2RB/CD24/PTGER4/IL18/PTGES/HAVCR2/CCR7/PTAFR/S100A14/ANKRD1/PENK/IL12B/PTGS2/SNCA/PTPN22/TNFRSF11A/NLRP7/CXCL3/STAP1/SSC5D/INAVA/CXCL8/TNF/FGF10/ACOD1/GSTP1/ABR/IL1B/CD80/TNIP3/LOXL1/PF4V1/SCGB1A1/CXCL1/AICDA/CXCL6/TAC1/DEFA5/CXCL5	65	6.32577
BP	GO:0032956	regulation of actin cytoskeleton organization	65/2423	343/18670	0.00100562	0.00861547	0.0063176	ACTN2/ODAM/CTNNA2/LMOD2/RHOBTB1/COTL1/SH3BP1/CARMIL1/SPIRE1/CCL11/NCKAP1L/TRPM2/NEB/TGFB3/ECT2/CAV3/BAIAP2L2/HCK/LIMK1/PLEK/CORO1A/ADD2/SPTB/NCK2/CAPG/TGFB1/RHOF/FSCN1/KIRREL1/MAGEL2/LIMCH1/RHOH/PFN2/SFRP1/CARMIL2/PTGER4/NTRK3/CCR7/FLNA/ARHGAP28/PDGFRA/STAP1/FMN1/CCL26/EPHA3/SLIT2/DBN1/SCIN/SPTA1/RGS4/TMSB15B/CRACD/PLEKHH2/TACSTD2/LPAR1/FHOD3/VANGL2/FMN2/SEMA3E/TAC1/ARHGAP40/EPHA5/EFNA5/RHOV/SMIM…	65	6.82191
BP	GO:0001838	embryonic epithelial tube formation	29/2423	124/18670	0.00103056	0.00875975	0.0064234	MTHFD1/GDNF/PTK7/HNF1B/TEAD2/GATA3/TGFB1/SALL4/SFRP1/IRX2/TWIST1/PRICKLE1/BMP5/TGFB2/FZD1/SOX4/CTHRC1/SFRP2/NOG/FZD2/FOLR1/SOX11/VANGL2/SPINT2/OVOL2/ALX1/BMP7/SPINT1/GRHL2	29	4.64238
BP	GO:0046717	acid secretion	29/2423	124/18670	0.00103056	0.00875975	0.0064234	SLC1A2/AQP9/ABCB11/GLS2/ABCB4/CYP4A11/ADORA1/OXTR/SYK/SV2A/SNCA/TNFRSF11A/SLC1A5/IL1B/PLA2R1/HRH2/SLC9A4/SYT4/LEP/SNAP25/PLA2G4A/DRD2/NPY5R/NTRK2/PLA2G4F/PLA2G2D/PPFIA4/CCKBR/TFF2	29	3.15682
BP	GO:0110111	negative regulation of animal organ morphogenesis	12/2423	35/18670	0.00103196	0.00875975	0.0064234	RSPO2/HNF1B/GREM1/TNFRSF11B/GATA3/FOXC2/TNF/TGFB2/NOG/TACSTD2/SULF1/BMP7	12	2.88675
BP	GO:1901385	regulation of voltage-gated calcium channel activity	12/2423	35/18670	0.00103196	0.00875975	0.0064234	KCNE2/CBARP/CACNA2D1/CACNB3/GEM/HPCA/CACNB1/RRAD/STAC/DRD2/STAC2/CRHR1	12	2.88675
BP	GO:0042095	interferon-gamma biosynthetic process	8/2423	18/18670	0.00103726	0.00875975	0.0064234	LILRB1/CLEC7A/TLR7/IL18/IL12B/TNFRSF13C/TLR8/INHA	8	2.82843
BP	GO:0048557	embryonic digestive tract morphogenesis	8/2423	18/18670	0.00103726	0.00875975	0.0064234	HNF1B/GLI3/PDGFRA/FGF10/SOX11/SHOX2/OVOL2/SIX2	8	2.82843
BP	GO:0060749	mammary gland alveolus development	8/2423	18/18670	0.00103726	0.00875975	0.0064234	ESR1/AR/FOXB1/AREG/TNFRSF11A/TPH1/ERBB4/DDR1	8	1.41421
BP	GO:0061377	mammary gland lobule development	8/2423	18/18670	0.00103726	0.00875975	0.0064234	ESR1/AR/FOXB1/AREG/TNFRSF11A/TPH1/ERBB4/DDR1	8	1.41421
BP	GO:0150078	positive regulation of neuroinflammatory response	8/2423	18/18670	0.00103726	0.00875975	0.0064234	TREM2/IL6/MMP8/IL18/TAFA3/STAP1/TNF/IL1B	8	2.82843
BP	GO:1905276	regulation of epithelial tube formation	8/2423	18/18670	0.00103726	0.00875975	0.0064234	GDNF/PTK7/GATA3/SFRP1/FZD1/SFRP2/FZD2/VANGL2	8	2.12132
BP	GO:0001759	organ induction	9/2423	22/18670	0.00104068	0.00877614	0.00643542	AR/GDNF/FGF1/HOXA11/DKK1/FGF10/FGFR1/HOXC11/WNT2	9	1.66667
BP	GO:0030168	platelet activation	34/2423	153/18670	0.00105578	0.00887819	0.00651025	SAA1/GP9/GNA15/DGKA/VAV1/ENTPD2/C1QTNF1/LCK/PRKCQ/P2RX1/PIK3CG/TREML1/PLEK/PRKCB/IL6/TRPC3/FLNA/SYK/P2RY12/DGKK/SERPINE2/PDGFRA/PRKCG/TYRO3/COL1A2/TRPC7/COL1A1/COL3A1/UBASH3B/PDPN/PF4V1/ADRA2A/COMP/ITPR3	34	5.14496
BP	GO:0050729	positive regulation of inflammatory response	34/2423	153/18670	0.00105578	0.00887819	0.00651025	FABP4/KLKB1/TREM2/S100A9/LTA/ADAM8/FFAR2/PIK3CG/C2CD4A/CLEC7A/IL2/IL6/TLR7/MMP8/PTGER4/IL18/CCR7/ADORA2B/TAFA3/IL12B/PTGS2/OSM/CCN4/SNCA/TNFRSF11A/ABCC1/STAP1/TNF/IL1B/MAPK13/GBP5/NPY5R/TLR10/TAC1	34	5.14496
BP	GO:0045665	negative regulation of neuron differentiation	46/2423	225/18670	0.00107475	0.00902485	0.00661779	ASCL1/MT3/TNR/CNTN4/PMP22/HES4/JAG1/PLXNA3/MINAR1/HOXA2/SOX2/EPHA7/SEMA6D/NLGN3/PTPRO/RAP1GAP2/TLX2/CRMP1/SEMA3D/TRIM46/DPYSL3/OLIG2/SEMA4D/ID4/GLI3/INPP5J/CD38/SEMA4A/BCL11A/SPP1/ZNF536/DKK1/SLIT2/ISL2/SEMA6A/ZNF365/ISL1/LPAR1/SEMA3A/STMN2/NLGN1/SEMA3E/SEMA3C/BMP7/LBX1/SIX3	46	5.89768
BP	GO:0030510	regulation of BMP signaling pathway	23/2423	91/18670	0.00109085	0.00914706	0.00670741	GREM2/HJV/NBL1/GREM1/CRB2/SFRP1/SOST/DKK1/FZD1/SFRP4/CHRDL1/WNT1/TFAP2B/HTRA3/FOXD1/SFRP2/NOG/SULF1/SOX11/MSX2/CER1/ITGA3/SFRP5	23	3.96177
BP	GO:0001709	cell fate determination	13/2423	40/18670	0.001141	0.00954059	0.00699598	ASCL1/JAG1/HOXA2/GATA3/CYP26B1/ATOH1/NTF4/DSCAML1/WNT1/PRRX1/ISL1/MYOD1/LBX1	13	3.05085
BP	GO:0045124	regulation of bone resorption	13/2423	40/18670	0.001141	0.00954059	0.00699598	PDK4/ADAM8/TNFRSF11B/MC4R/IL6/SYK/CD38/TNFRSF11A/SPP1/UBASH3B/TMEM119/CLDN18/IL20RA	13	3.05085
BP	GO:0051048	negative regulation of secretion	48/2423	238/18670	0.00115177	0.00961704	0.00705204	C1QTNF3/CSN2/CIDEA/KCNB1/ADIPOQ/CARD17/LGALS9/IL13RA2/FFAR4/LILRB1/CBARP/CD84/TNFRSF21/IL10/SFRP1/ADORA1/PTGER4/FAM3D/OXTR/P2RY12/TIFAB/OSM/SNCA/PTPN22/NLRP7/SSC5D/HDAC9/TNF/CD22/TLR8/ABR/IL1B/PLA2R1/INHA/STXBP5L/SYT4/MTNR1B/LEP/FGF23/DRD2/NPY5R/IL11/LIF/ADRA2A/BANK1/CRHR1/CHGA/TFF2	48	5.48483
BP	GO:0003333	amino acid transmembrane transport	22/2423	86/18670	0.00116809	0.00972084	0.00712815	SLC1A2/SLC6A12/SLC25A15/SLC16A12/SLC7A8/SLC7A1/SLC38A1/SLC38A5/SLC17A8/SLC6A8/SLC6A5/SLC7A7/SLC1A5/KCNJ10/RGS2/SLC6A19/RGS4/PDPN/SLC6A6/SLC7A4/SLC6A14/SLC6A15	22	2.98481
BP	GO:0015696	ammonium transport	26/2423	108/18670	0.00116913	0.00972084	0.00712815	DRD1/SLC6A2/RHBG/SYT9/SLC22A1/CHRNA4/SLC25A47/GDNF/SNCG/LILRB1/SLC18A1/P2RX1/AQP1/FGF20/SYT3/SLC6A8/SLC44A4/SYK/SLC6A3/SNCA/CHRNA6/SYT4/DRD2/MAPK15/SYT8/SYT13	26	1.96116
BP	GO:0032526	response to retinoic acid	26/2423	108/18670	0.00116913	0.00972084	0.00712815	ASCL1/RXRG/PTK7/LTK/TEAD2/TBX1/HOXA2/AQP1/MYB/NTRK3/PTGES/CD38/TESC/DKK1/EPHA3/CYP26B1/TNC/WNT10B/FZD7/GJB3/COL1A1/LEP/RORB/WNT2/WNT9A/WNT7B	26	4.31455
BP	GO:0045471	response to ethanol	29/2423	125/18670	0.00117857	0.00978557	0.00717562	CYP2E1/IL13/ADH7/ADH6/ADIPOQ/CDO1/SLC2A4/SPI1/GATA3/IL2/NTRK3/CYBB/PENK/GRIN1/SLC6A3/CD27/G6PD/GRIN2A/GSTP1/TNC/RGS2/RGS4/CCL7/LEP/DRD2/APOBEC1/CRHR1/HTR3A/CLDN18	29	2.78543
BP	GO:0010771	negative regulation of cell morphogenesis involved in differentiation	24/2423	97/18670	0.00118547	0.00982907	0.00720752	MT3/TNR/PLXNA3/EPHA7/SEMA6D/NLGN3/PTPRO/TLX2/SEMA3D/TRIM46/SEMA4D/FBLN1/SEMA4A/SPP1/MELTF/SLIT2/SEMA6A/TACSTD2/SEMA3A/POSTN/NLGN1/SEMA3E/SEMA3C/EFNA5	24	4.08248
BP	GO:0043304	regulation of mast cell degranulation	11/2423	31/18670	0.00120231	0.00992702	0.00727934	IL13/LGALS9/IL13RA2/FGR/CD84/RAC2/ADORA2B/SYK/ADGRE2/UNC13D/CRHR1	11	2.7136
BP	GO:0045742	positive regulation of epidermal growth factor receptor signaling pathway	11/2423	31/18670	0.00120231	0.00992702	0.00727934	EPGN/FASLG/HAP1/ADORA1/NCF1/PLAUR/MMP9/TGFA/ADRA2A/EREG/AGR2	11	3.31662
BP	GO:0051482	positive regulation of cytosolic calcium ion concentration involved in phospholipase C-activating G protein-coupled signaling pathway	11/2423	31/18670	0.00120231	0.00992702	0.00727934	DRD1/GNA15/GPR20/GPR18/GRM1/GPR55/GPR174/P2RY10/LPAR1/HTR2C/LPAR3	11	2.7136
BP	GO:0002819	regulation of adaptive immune response	35/2423	160/18670	0.00120654	0.00994805	0.00729476	C4BPA/HPX/C4BPB/RIPK3/CD48/LTA/LILRB1/PRKCQ/IL12RB1/IL12A/CD1C/SASH3/GATA3/TNFSF13B/TGFB1/CCL19/IL2/IL10/IL6/JAK3/CR1/SAMSN1/PTPRC/IL18/IL7R/HAVCR2/IL12B/TNFRSF13C/CD1E/TNF/IL1B/CD80/CD1B/CD1A/FOXJ1	35	4.90189
BP	GO:0046887	positive regulation of hormone secretion	30/2423	131/18670	0.0012219	0.0100153	0.00734406	C1QTNF3/GCK/ADCY8/GLUL/RASL10B/GPLD1/PDX1/C1QTNF1/MYB/ILDR1/CD38/RETN/FOXL2/NKX6-1/SPP1/UCN3/CYP19A1/INHA/SOX4/FGFR1/GAL/LEP/GPR27/SOX11/DRD2/ISL1/TAC1/GIPR/SLC30A8/CFTR	30	3.28634
BP	GO:0098754	detoxification	30/2423	131/18670	0.0012219	0.0100153	0.00734406	MT1B/GSTM1/MT1X/MT1M/ADH4/MT2A/MT1G/MT3/MT1E/MT1H/HP/HBD/HBM/RGN/ABCG2/GSTZ1/S100A9/PTGS1/HBQ1/SOD3/DUOX1/PTGS2/APOA4/ALOX5AP/GPX8/TNF/GSTP1/HBE1/BMP7/DUOX2	30	-0.365148
BP	GO:0001976	neurological system process involved in regulation of systemic arterial blood pressure	6/2423	11/18670	0.00122315	0.0100153	0.00734406	ACE2/P2RX2/ADRA1A/ASIC2/TNNI3/DRD2	6	0
BP	GO:0045919	positive regulation of cytolysis	6/2423	11/18670	0.00122315	0.0100153	0.00734406	GPLD1/CFHR5/CFHR2/LILRB1/PGLYRP3/PGLYRP4	6	0
BP	GO:1902563	regulation of neutrophil activation	6/2423	11/18670	0.00122315	0.0100153	0.00734406	ITGB2/ITGAM/PTAFR/SYK/ABR/CD177	6	2.44949
BP	GO:0071248	cellular response to metal ion	40/2423	190/18670	0.00123636	0.0101095	0.00741314	CYP11B2/MT1B/CYP1A2/ACER1/CYP1A1/MT1X/ADCY8/FABP4/SYT9/MT1M/MT2A/MT1G/MT3/MT1E/GPLD1/MT1H/PPARGC1A/TRPM2/ECT2/CPNE4/IQGAP1/AQP1/SYT3/CYBB/HPCA/PTGS2/SNCA/RYR1/NCF1/ALOX5AP/SLC25A24/DPEP1/TFAP2A/ANK3/SYT4/RASAL1/MMP9/NLGN1/SYT8/SYT13	40	0.948683
BP	GO:0010171	body morphogenesis	15/2423	50/18670	0.00124283	0.0101484	0.00744166	MYH3/GREM2/MAB21L2/TGFB3/TBX1/TGFB1/PHLDB1/DLX5/PDGFRA/DKK1/MMP2/COL1A1/NOG/PAX9/STRA6	15	2.84019
BP	GO:0030879	mammary gland development	32/2423	143/18670	0.00129055	0.0105235	0.00771674	CSN2/ESR1/TBX3/CSN3/SERPINC1/AR/CDO1/FOXB1/CCL11/TGFB3/CAV3/GATA3/TGFB1/AREG/IGFBP5/OXTR/GLI3/SLC6A3/TNFRSF11A/TPH1/FGF10/CYP19A1/ERBB4/WNT2/GLI2/MSX2/DDR1/PRL/NRG3/ATP2C2/HOXB9/WNT7B	32	3.18198
BP	GO:0060411	cardiac septum morphogenesis	20/2423	76/18670	0.0013204	0.010752	0.00788433	TBX3/SLIT3/JAG1/TBX5/TBX1/TBX20/BMP5/TGFB2/SLIT2/FZD1/SOX4/NOG/FZD2/SOX11/MSX2/ISL1/VANGL2/NKX2-5/SEMA3C/BMP7	20	4.02492
BP	GO:0070374	positive regulation of ERK1 and ERK2 cascade	44/2423	215/18670	0.00133281	0.0108383	0.00794755	MT3/ADRA1A/HTR2B/CCL16/TREM2/LGALS9/FGF19/FFAR4/CCL11/GLIPR2/TGFB1/CCL19/FGF20/GPR183/RASGRP1/FPR2/PTPRC/P2RY6/HAVCR2/CCR7/MARCO/GPNMB/GPR55/PTPN22/PDGFRA/TNFRSF11A/APELA/CCL22/TNF/CCL26/FGF10/ERBB4/CCL7/FGF4/FGF23/ALKAL2/DRD2/NPY5R/ARHGAP8/HAND2/CALCR/HTR2C/ALKAL1/CHRNA7	44	5.4272
BP	GO:0006882	cellular zinc ion homeostasis	12/2423	36/18670	0.00136724	0.0110741	0.00812048	MT1B/MT1X/MT1M/MT2A/MT1G/MT3/MT1E/MT1H/SLC30A2/S100A9/LCK/SLC30A8	12	-1.73205
BP	GO:2000516	positive regulation of CD4-positive, alpha-beta T cell activation	12/2423	36/18670	0.00136724	0.0110741	0.00812048	LGALS9/CD86/NCKAP1L/PRKCQ/IL12RB1/SASH3/CCL19/MYB/IL18/IFNG/IL12B/CD80	12	3.4641
BP	GO:0001964	startle response	10/2423	27/18670	0.00137117	0.0110741	0.00812048	DRD1/CTNNA2/PENK/GRIN1/SLC6A3/SLITRK6/GRIN2A/DRD2/GRID2/NRXN1	10	1.89737
BP	GO:0032673	regulation of interleukin-4 production	10/2423	27/18670	0.00137117	0.0110741	0.00812048	LGALS9/CD86/PRKCQ/SASH3/GATA3/CD3E/HAVCR2/SYK/SCGB1A1/IRF4	10	3.16228
BP	GO:0036336	dendritic cell migration	10/2423	27/18670	0.00137117	0.0110741	0.00812048	CCR6/LGALS9/TRPM2/IL12A/PIK3CG/CCL19/GPR183/CCR5/CCR7/SLAMF8	10	3.16228
BP	GO:0072175	epithelial tube formation	30/2423	132/18670	0.00138872	0.0112006	0.00821321	MTHFD1/GDNF/PTK7/HNF1B/TEAD2/GATA3/TGFB1/SALL4/SFRP1/IRX2/TWIST1/PRICKLE1/BMP5/TGFB2/FGF10/FZD1/SOX4/CTHRC1/SFRP2/NOG/FZD2/FOLR1/SOX11/VANGL2/SPINT2/OVOL2/ALX1/BMP7/SPINT1/GRHL2	30	4.74693
BP	GO:0046888	negative regulation of hormone secretion	18/2423	66/18670	0.00145441	0.0117144	0.00859002	KCNB1/ADIPOQ/SFRP1/ADORA1/FAM3D/OSM/IL1B/INHA/STXBP5L/MTNR1B/LEP/FGF23/DRD2/IL11/LIF/ADRA2A/CRHR1/CHGA	18	3.29983
BP	GO:1904064	positive regulation of cation transmembrane transport	32/2423	144/18670	0.00145685	0.0117181	0.00859274	ACTN2/LRRC52/DRD1/IL13/FXYD1/KCNE2/RGN/TREM2/LRRC26/HAP1/NLGN3/CACNA2D1/CACNB3/CXCL9/ANK2/P2RY6/IFNG/FLNA/SNCA/TESC/CEMIP/G6PD/KCNH2/CD19/LRRC38/ANK3/GAL/STAC/STAC2/CALCR/WNK2/TRDN	32	3.18198
BP	GO:0006855	drug transmembrane transport	21/2423	82/18670	0.00147271	0.0118297	0.00867453	SLC1A2/SLC13A3/SLC13A5/SLC22A1/SLC47A1/SLC25A15/SLC16A12/AQP1/SLC7A1/SLC17A8/SLC6A8/SLC6A5/ABCC1/SLC1A5/KCNJ10/RGS2/RGS4/SLC13A1/FOLR1/SLC4A11/STRA6	21	1.52753
BP	GO:0003073	regulation of systemic arterial blood pressure	23/2423	93/18670	0.00149419	0.0119697	0.00877723	CYP11B2/ACE2/KLK3/KLK2/REN/MME/P2RX2/DRD5/RASL10B/AR/ADRA1A/CYP4A11/ASIC2/ADAMTS16/PTPRO/AVPR1B/ADORA1/OXTR/NPPB/TNNI3/DRD2/POSTN/KLK1	23	-0.208514
BP	GO:0046634	regulation of alpha-beta T cell activation	23/2423	93/18670	0.00149419	0.0119697	0.00877723	LGALS9/CD86/ZAP70/NCKAP1L/LILRB1/PRKCQ/IL12RB1/IL12A/SASH3/GATA3/CD3E/CCL19/IL2/MYB/JAK3/PTPRC/IL18/IFNG/GLI3/SYK/IL12B/CD80/IRF4	23	4.79583
BP	GO:0030856	regulation of epithelial cell differentiation	34/2423	156/18670	0.00150089	0.0120072	0.00880468	REG3A/ASCL1/IL13/TBX3/TMEM100/ADIPOQ/MYCL/GDNF/JAG1/GATA3/PRKX/CD24/IFNG/CTSK/KRT36/NKX6-1/TNF/IL1B/ATOH1/SFRP4/WNT10B/REG3G/AJAP1/ALOX15B/MMP9/MSX2/LIF/FOXN1/LHX1/OVOL2/FOXJ1/ESRP1/GRHL2/PROM1	34	3.08697
BP	GO:0032370	positive regulation of lipid transport	17/2423	61/18670	0.001506	0.0120144	0.00880998	ABCB4/ADIPOQ/CYP4A11/PON1/C1QTNF1/MYB/RETN/TNFRSF11A/PLTP/SPP1/CYP19A1/IL1B/PLA2R1/GAL/ABCA12/ATP8A2/TAC1	17	2.18282
BP	GO:0045123	cellular extravasation	17/2423	61/18670	0.001506	0.0120144	0.00880998	SELE/RIPK3/CCL28/ADAM8/PIK3CG/ITGA4/ADD2/SPN/PIK3CD/ITGB2/PTGER4/PTAFR/TNF/ABR/GCNT1/LEP/CD177	17	3.63803
BP	GO:0032753	positive regulation of interleukin-4 production	9/2423	23/18670	0.0015144	0.0120144	0.00880998	LGALS9/CD86/PRKCQ/SASH3/GATA3/CD3E/HAVCR2/SYK/IRF4	9	3
BP	GO:0050995	negative regulation of lipid catabolic process	9/2423	23/18670	0.0015144	0.0120144	0.00880998	CIDEA/GPLD1/APOC3/APOC1/PIK3CG/ADORA1/TNF/IL1B/ADRA2A	9	0.333333
BP	GO:0060445	branching involved in salivary gland morphogenesis	9/2423	23/18670	0.0015144	0.0120144	0.00880998	FGF7/TNF/FGF10/HGF/FGFR1/SEMA3A/SEMA3C/BMP7/LAMA1	9	3
BP	GO:0031960	response to corticosteroid	35/2423	162/18670	0.00151489	0.0120144	0.00880998	ALDH3A1/TAT/PCK2/PFKFB1/ADIPOQ/CPS1/CDO1/SLIT3/PDX1/AANAT/AQP1/TGFB1/AREG/IL10/IL6/NTRK3/PTAFR/CYBB/PTGS2/FIBIN/TRIM63/S100B/UCN3/TNF/GSTP1/SLIT2/COL1A1/SCGB1A1/ISL1/CALCR/MYOD1/SSTR3/ANXA3/NEFL/WNT7B	35	3.54965
BP	GO:0090092	regulation of transmembrane receptor protein serine/threonine kinase signaling pathway	48/2423	241/18670	0.00151601	0.0120144	0.00880998	CIDEA/GREM2/HJV/NBL1/TGFB3/GREM1/CAV3/CRB2/LEFTY2/GDF10/TGFB1/TBX20/SFRP1/EMILIN1/HTRA4/CHST11/SOST/CILP/BMP5/DKK1/TGFB2/FGF10/FZD1/RASL11B/INHA/SFRP4/CHRDL1/WNT1/TFAP2B/HTRA3/LEFTY1/FOXD1/SFRP2/NOG/FOLR1/SULF1/SOX11/DMRT1/BMP3/MSX2/CER1/FBN2/PMEPA1/ITGA3/OVOL2/BMP7/VEPH1/SFRP5	48	6.06218
BP	GO:0034310	primary alcohol catabolic process	7/2423	15/18670	0.001525	0.0120374	0.00882683	SULT1B1/ADH7/ALDH2/HAO1/SULT2A1/SULT1C4/ALDH3B2	7	-1.13389
BP	GO:0060134	prepulse inhibition	7/2423	15/18670	0.001525	0.0120374	0.00882683	DRD1/CTNNA2/GRIN1/SLC6A3/DRD2/GRID2/NRXN1	7	1.13389
BP	GO:0090177	establishment of planar polarity involved in neural tube closure	7/2423	15/18670	0.001525	0.0120374	0.00882683	PTK7/SFRP1/FZD1/CTHRC1/SFRP2/FZD2/VANGL2	7	2.64575
BP	GO:0006941	striated muscle contraction	37/2423	174/18670	0.00152882	0.0120514	0.00883712	ACE2/MYH3/CTNNA3/KCNJ8/ADRA1A/STRIT1/KCNE2/PDE5A/MYL2/CAV3/PIK3CG/CCDC78/MYH6/TNNI2/DSG2/CACNA2D1/ANK2/ADORA1/SCN2B/FLNA/KCNE4/TNNI3/MYH7/KCNH2/JSRP1/CHRNA1/SCN3B/CACNA1G/RGS2/STAC/STAC2/CHRND/ATP8A2/NKX2-5/TNNT1/CHGA/HCN4	37	3.78118
BP	GO:0060443	mammary gland morphogenesis	14/2423	46/18670	0.00153342	0.0120716	0.00885191	ESR1/TBX3/AR/CCL11/CAV3/TGFB1/AREG/IGFBP5/GLI3/FGF10/GLI2/MSX2/DDR1/NRG3	14	2.13809
BP	GO:0060113	inner ear receptor cell differentiation	16/2423	56/18670	0.00154081	0.0121136	0.00888277	CLRN1/USH2A/MYCL/JAG1/PDZD7/FGF20/SLITRK6/USH1G/ATOH1/FGFR1/CTHRC1/FZD2/MCOLN3/VANGL2/ESRP1/GABRA5	16	2.5
BP	GO:0045103	intermediate filament-based process	15/2423	51/18670	0.00155249	0.0121757	0.00892827	KRT2/PKP1/DES/KRT14/SYNC/EPPK1/KRT9/EVPL/NEFM/PRPH/KRT17/KRT16/ATP8A2/KRT20/NEFL	15	3.87298
BP	GO:0006939	smooth muscle contraction	26/2423	110/18670	0.00155281	0.0121757	0.00892827	DRD1/P2RX2/MLN/ADRA1A/HTR2B/P2RX3/GDNF/HTR7/P2RX1/GUCY1A1/ADORA1/PROK2/PTAFR/OXTR/ADORA2B/TIFAB/PTGS2/CD38/TNNI3/RGS2/SPHK1/SULF1/DRD2/TACR3/ADRA2A/COMP	26	2.35339
BP	GO:0002544	chronic inflammatory response	8/2423	19/18670	0.00158912	0.0124275	0.0091129	LTA/CCL11/IL10/PTGES/ADORA2B/TNF/CYP19A1/UNC13D	8	2.82843
BP	GO:0032930	positive regulation of superoxide anion generation	8/2423	19/18670	0.00158912	0.0124275	0.0091129	ITGB2/TGFB1/CLEC7A/ITGAM/FPR2/SYK/GSTP1/CD177	8	2.82843
BP	GO:0032970	regulation of actin filament-based process	71/2423	388/18670	0.00160865	0.0125463	0.0092	ACTN2/ODAM/CTNNA2/CTNNA3/LMOD2/RHOBTB1/COTL1/SH3BP1/CARMIL1/SPIRE1/CCL11/NCKAP1L/TRPM2/NEB/TGFB3/ECT2/CAV3/BAIAP2L2/HCK/LIMK1/PLEK/CORO1A/ADD2/SPTB/NCK2/CAPG/TGFB1/DSG2/RHOF/FSCN1/KIRREL1/MAGEL2/LIMCH1/RHOH/ANK2/PFN2/SFRP1/CARMIL2/ADORA1/PTGER4/NTRK3/CCR7/FLNA/ARHGAP28/PDGFRA/STAP1/FMN1/CCL26/EPHA3/SLIT2/DBN1/SCIN/SPTA1/RGS4/TMSB15B/CRACD/PLEKHH2/PDPN/TACSTD2/LPAR1/FHOD3/VANGL2/FMN2/SEMA3E/TAC1/A…	71	7.00201
BP	GO:0032496	response to lipopolysaccharide	62/2423	330/18670	0.00160947	0.0125463	0.0092	CYP1A2/CYP1A1/REN/IL13/SELE/PPARGC1A/CPS1/CARD17/TREM2/LGALS9/CD86/LTA/CNR2/DCN/FASLG/LILRB1/IL12A/HCK/TRIM6/PTGFR/TGFB1/CXCL9/IL10/IL6/CCR5/LDOC1/CSF2RB/PTGER4/IL18/PTGES/HAVCR2/CCR7/PTAFR/S100A14/ANKRD1/PENK/IL12B/PTGS2/SNCA/PTPN22/TNFRSF11A/NLRP7/CXCL3/STAP1/CXCL8/TNF/FGF10/ACOD1/GSTP1/ABR/IL1B/CD80/TNIP3/LOXL1/PF4V1/SCGB1A1/CXCL1/AICDA/CXCL6/TAC1/DEFA5/CXCL5	62	6.09601
BP	GO:0007189	adenylate cyclase-activating G protein-coupled receptor signaling pathway	31/2423	139/18670	0.00161167	0.0125463	0.0092	DRD1/ADCY8/DRD5/ADRA1A/LGR5/GCGR/PTGFR/ADGRG1/ADCY2/ADGRE5/CXCL9/MC4R/ADCY5/PTGER4/ADGRE1/GPR161/ADORA2B/ADGRE3/ADGRE2/ADGRB1/UCN3/APLP1/ADGRB2/ADGRB3/PTHLH/DRD2/GPR78/CALCR/ADRA2A/CRHR1/CHGA	31	3.4125
BP	GO:1902476	chloride transmembrane transport	22/2423	88/18670	0.00161279	0.0125463	0.0092	SLC12A1/FXYD1/SLC4A1/CLCN1/CLCA4/BEST1/GABRG1/CLCNKB/CLDN4/BEST3/CLIC6/GABRA4/GABRA2/GABRR1/GABRP/CLIC3/FXYD3/CLCA1/TTYH1/SLC26A9/CFTR/GABRA5	22	2.98481
BP	GO:0033006	regulation of mast cell activation involved in immune response	11/2423	32/18670	0.00161964	0.012583	0.00922694	IL13/LGALS9/IL13RA2/FGR/CD84/RAC2/ADORA2B/SYK/ADGRE2/UNC13D/CRHR1	11	2.7136
BP	GO:0070252	actin-mediated cell contraction	27/2423	116/18670	0.00162418	0.0126018	0.00924069	ACTN2/MYH3/CTNNA3/KCNJ8/KCNE2/NEB/MYL2/CAV3/MYH2/MYH6/TNNI2/DSG2/CACNA2D1/DES/ANK2/ADORA1/SCN2B/FLNA/KCNE4/TNNI3/MYH7/KCNH2/SCN3B/CACNA1G/PDPN/MYBPC2/TNNT1	27	3.27165
BP	GO:1903531	negative regulation of secretion by cell	43/2423	211/18670	0.00163523	0.0126709	0.00929137	C1QTNF3/CIDEA/KCNB1/ADIPOQ/CARD17/LGALS9/IL13RA2/FFAR4/LILRB1/CBARP/CD84/TNFRSF21/IL10/SFRP1/ADORA1/PTGER4/FAM3D/P2RY12/OSM/SNCA/PTPN22/NLRP7/SSC5D/HDAC9/TNF/CD22/TLR8/ABR/IL1B/INHA/STXBP5L/SYT4/MTNR1B/LEP/FGF23/DRD2/NPY5R/IL11/LIF/ADRA2A/BANK1/CRHR1/CHGA	43	5.33745
BP	GO:0001841	neural tube formation	25/2423	105/18670	0.00169778	0.0131384	0.0096342	MTHFD1/PTK7/TEAD2/TGFB1/SALL4/SFRP1/TWIST1/PRICKLE1/BMP5/TGFB2/FZD1/SOX4/CTHRC1/SFRP2/NOG/FZD2/FOLR1/SOX11/VANGL2/SPINT2/OVOL2/ALX1/BMP7/SPINT1/GRHL2	25	4.6
BP	GO:0045926	negative regulation of growth	49/2423	249/18670	0.00177487	0.0137078	0.0100518	MT1B/MT1X/NKD1/MT1M/MT2A/MT1G/MT3/MT1E/MT1H/TNR/PI16/SLIT3/PLXNA3/TBX5/MYL2/CAV3/MINAR1/EPHA7/CRYAB/STC2/SEMA6D/TGFB1/SEMA3D/TRIM46/SFRP1/SEMA4D/IGFBP5/RERG/SEMA4A/SERPINE2/BCL11A/NPPB/SPP1/G6PD/TGFB2/SLIT2/PLAC8/TMPRSS4/GAL/RGS2/RGS4/SEMA6A/SFRP2/ALOX15B/NOG/SEMA3A/KCNK2/SEMA3E/SEMA3C	49	4.14286
BP	GO:0031346	positive regulation of cell projection organization	70/2423	383/18670	0.00178358	0.0137078	0.0100518	CLRN1/CUX2/CPEB3/PTK7/LTK/S100A9/CARMIL1/PLXNA3/ANLN/TGFB3/HAP1/LIMK1/ISLR2/IQGAP1/KCTD17/CCL19/FSCN1/IL2/BDNF/CHODL/RAC2/SYT3/CNTN1/TENM3/CARMIL2/NTRK3/DPYSL3/SEMA4D/NEGR1/DZIP1/CCR7/ANKRD1/FOXO6/P2RY12/PLPPR5/ZNF804A/BMP5/EPHA3/SLIT2/DBN1/FZD1/GPC2/HGF/WNT1/FGFR1/RGS2/CRABP2/SYT4/RASAL1/L1CAM/PLXNB3/ALKAL2/SHOX2/UNC13A/LRP8/LPAR1/GRIP1/NTRK2/ATP8A2/STMN2/SLITRK1/ALKAL1/ITGA3/NLGN1/LPAR3/BMP7/EP…	70	7.64946
BP	GO:0048846	axon extension involved in axon guidance	12/2423	37/18670	0.00178757	0.0137078	0.0100518	SLIT3/PLXNA3/SLIT1/SEMA6D/SEMA3D/SEMA4D/SEMA4A/SLIT2/SEMA6A/SEMA3A/SEMA3E/SEMA3C	12	3.4641
BP	GO:0060323	head morphogenesis	12/2423	37/18670	0.00178757	0.0137078	0.0100518	MYH3/TGFB3/TBX1/TGFB1/DLX5/PDGFRA/DKK1/MMP2/COL1A1/NOG/PAX9/STRA6	12	2.88675
BP	GO:0071276	cellular response to cadmium ion	12/2423	37/18670	0.00178757	0.0137078	0.0100518	MT1B/CYP1A2/MT1X/MT1M/MT2A/MT1G/MT3/MT1E/MT1H/CYBB/NCF1/MMP9	12	-1.73205
BP	GO:0071542	dopaminergic neuron differentiation	12/2423	37/18670	0.00178757	0.0137078	0.0100518	RSPO2/VEGFD/FGF20/SFRP1/PITX3/DKK1/FZD1/EN1/WNT1/WNT2/LMX1B/SFRP2	12	2.3094
BP	GO:1902284	neuron projection extension involved in neuron projection guidance	12/2423	37/18670	0.00178757	0.0137078	0.0100518	SLIT3/PLXNA3/SLIT1/SEMA6D/SEMA3D/SEMA4D/SEMA4A/SLIT2/SEMA6A/SEMA3A/SEMA3E/SEMA3C	12	3.4641
BP	GO:0050679	positive regulation of epithelial cell proliferation	42/2423	206/18670	0.00182189	0.0139529	0.0102315	REG3A/ODAM/VEGFD/GLUL/AR/HTR2B/ANG/IGF1/EPGN/CCL11/TBX1/LAMB1/ITGA4/TGFB1/AREG/IL10/FGF7/SFRP1/FGFBP1/FGF1/DLX5/TWIST1/DLX6/APELA/PTPRN/BMP5/F3/CCL26/FGF10/FGFR1/REG3G/FZD7/HAS2/WNT2/CDH3/PLXNB3/NOG/SOX11/TGFA/EYA1/SCG2/MMP12	42	4.01189
BP	GO:0045453	bone resorption	17/2423	62/18670	0.00182813	0.0139703	0.0102442	PDK4/ADAM8/TNFRSF11B/RAC2/MC4R/IL6/LRRK1/CTSK/SYK/GPR55/CD38/TNFRSF11A/SPP1/UBASH3B/TMEM119/CLDN18/IL20RA	17	3.63803
BP	GO:0051260	protein homooligomerization	65/2423	351/18670	0.00182888	0.0139703	0.0102442	ACTN2/SLC1A2/ADCY8/DCXR/GLUL/CTH/GNMT/P2RX2/CRYAA/ACADL/SEPTIN4/KCNB1/ADIPOQ/P2RX3/SLC22A1/MIP/MAT1A/UPB1/RIPK3/C1QTNF2/TRPM2/C1QTNF1/ECT2/P2RX1/IKBKE/CRYAB/VWA2/KCNS2/KCTD17/CD3E/KCNA3/AQP10/ILDR1/DPYSL3/EMILIN1/PRTG/CD3G/TCL1A/RYR1/SLC1A5/TRIM72/ALOX5AP/CALHM1/HCN1/KCNS1/MPP2/MUC20/KCNG3/VSTM5/GBP5/TRPV5/KCNF1/KCTD19/PKM/PFKP/CD79A/HRK/KCNV1/KCND2/SCARA5/NLGN1/ITPR3/KCTD8/TRPA1/OLFM4	65	3.59701
BP	GO:0007215	glutamate receptor signaling pathway	24/2423	100/18670	0.00185318	0.0141366	0.0103661	ACTN2/RASGRF1/KCNB1/SSTR1/PPARGC1A/GRM6/GRM5/GRIA4/NLGN3/HOMER3/GRM1/IFNG/GRIN1/GRM3/GRIN2A/DLG3/GRM4/SHISA9/UNC13A/GRID2/GRIA2/ANXA3/NLGN1/NEFL	24	2.85774
BP	GO:0051153	regulation of striated muscle cell differentiation	27/2423	117/18670	0.00185542	0.0141366	0.0103661	IGF1/PI16/ANKRD2/NIBAN2/GREM1/CAV3/TBX1/TGFB1/CD53/BDNF/CXCL9/TRIM72/ADGRB1/G6PD/DKK1/HDAC9/CYP26B1/MMP14/RGS2/FZD7/RGS4/BHLHE41/TMEM119/SHOX2/MYOD1/CEACAM5/NKX2-5	27	4.81125
BP	GO:0010976	positive regulation of neuron projection development	54/2423	281/18670	0.00186541	0.0141762	0.0103952	CUX2/CPEB3/PTK7/LTK/S100A9/PLXNA3/LIMK1/ISLR2/IQGAP1/IL2/BDNF/CHODL/SYT3/CNTN1/TENM3/NTRK3/DPYSL3/SEMA4D/NEGR1/ANKRD1/FOXO6/PLPPR5/ZNF804A/BMP5/EPHA3/SLIT2/DBN1/FZD1/GPC2/HGF/FGFR1/RGS2/CRABP2/SYT4/RASAL1/L1CAM/PLXNB3/ALKAL2/SHOX2/UNC13A/LRP8/LPAR1/GRIP1/NTRK2/ATP8A2/STMN2/SLITRK1/ALKAL1/ITGA3/NLGN1/LPAR3/BMP7/EFNA5/NEFL	54	6.80414
BP	GO:0030100	regulation of endocytosis	54/2423	281/18670	0.00186541	0.0141762	0.0103952	SH3GL3/SELE/APOC3/APOA5/ADIPOQ/APOC1/C4BPA/C4BPB/SLC2A4/TREM2/PIP4P2/RAB31/FGR/NCKAP1L/LILRB1/GREM1/CAV3/IL2RB/HCK/BICD1/SIRPB1/TGFB1/CLEC7A/CCL19/PTX3/DOCK2/RSPO1/IL2RG/FPR2/SIRPG/PTPRC/IFNG/HPCA/SYK/SNCA/DNM1/CALY/APELA/STAP1/DKK1/TNF/CD22/ABR/EPHA3/IL1B/PRKCG/SFRP4/SPHK1/SYT4/CD177/DRD2/NLGN1/PROM2/SNAP91	54	4.89898
BP	GO:0033003	regulation of mast cell activation	13/2423	42/18670	0.00188564	0.0143072	0.0104913	IL13/LGALS9/CNR2/IL13RA2/FGR/CD84/RAC2/ADORA2B/SYK/ADGRE2/UNC13D/CRLF2/CRHR1	13	3.05085
BP	GO:0009074	aromatic amino acid family catabolic process	10/2423	28/18670	0.00188749	0.0143072	0.0104913	HPD/TAT/IDO2/HGD/UROC1/AADAT/HAAO/GSTZ1/AMDHD1/IL4I1	10	-2.52982
BP	GO:0051928	positive regulation of calcium ion transport	28/2423	123/18670	0.00191787	0.0145189	0.0106465	DRD1/CAMK2A/IL13/P2RX2/STRIT1/P2RX3/KCNE2/RGN/HAP1/GRM6/CACNA2D1/CACNB3/P2RX5/CXCL9/TRPC3/ANK2/P2RY6/GRIN1/SNCA/CEMIP/G6PD/CD19/STAC/STAC2/CALCR/TRDN/LPAR3/ATP2C2	28	2.26779
BP	GO:0046638	positive regulation of alpha-beta T cell differentiation	14/2423	47/18670	0.00192695	0.0145505	0.0106696	LGALS9/CD86/ZAP70/NCKAP1L/IL12RB1/SASH3/CCL19/MYB/IL18/IFNG/GLI3/SYK/IL12B/CD80	14	3.74166
BP	GO:0098868	bone growth	14/2423	47/18670	0.00192695	0.0145505	0.0106696	COL7A1/LEPR/POR/COL14A1/COL12A1/VWA2/COL6A2/COL6A3/LEP/MSX2/CER1/BNC2/COMP/MMP13	14	2.13809
BP	GO:0002456	T cell mediated immunity	25/2423	106/18670	0.00195318	0.0147297	0.0108011	RIPK3/JAG1/LILRB1/IL12RB1/IL12A/CD1C/SASH3/CD70/GATA3/MYO1G/ULBP2/ULBP3/IL6/PTPRC/IL18/IL7R/CD8A/IL12B/CD1E/IL1B/ULBP1/AIRE/CD1B/RAET1L/CD1A	25	5
BP	GO:0002449	lymphocyte mediated immunity	65/2423	352/18670	0.00196521	0.0148016	0.0108538	C8A/C6/C4BPA/HPX/C4BPB/APCS/RIPK3/CCR6/LGALS9/SLAMF6/VAV1/LTA/IL13RA2/JAG1/GZMB/KLRF2/LILRB1/IL12RB1/IL12A/CD1C/SASH3/CD70/GATA3/CORO1A/MYO1G/ULBP2/TGFB1/IL2/ULBP3/SH2D1A/IL10/IL6/CR1/RASGRP1/PTPRC/IL18/CRTAM/IL7R/HAVCR2/KLRC2/CD8A/KIR2DL4/IL12B/CD27/CD1E/TNF/TLR8/IL1B/CD19/SLAMF7/ULBP1/UNC13D/GAPT/AIRE/IGLL1/LEP/CD1B/RAET1L/AICDA/GCNT3/IGLL5/CD1A/CR2/SERPINB4/FOXJ1	65	6.57384
BP	GO:0016042	lipid catabolic process	62/2423	333/18670	0.0020129	0.0151257	0.0110915	CYP3A4/CYP1A2/ACER1/ABHD1/CIDEA/FABP4/MT3/ACADL/CYP39A1/GPLD1/AMACR/PCK2/LRCOL1/CYP7A1/APOC3/APOA5/ADIPOQ/CES5A/EHHADH/APOC1/HSD17B6/CYP4A11/CPS1/HAO1/SULT2A1/CES3/CES4A/GCDH/PLA2G4E/TRERF1/PIK3CG/PLBD1/FABP5/SMPDL3B/LIPH/ADORA1/CRABP1/CLPSL2/GLYATL2/TWIST1/APOA4/SPP1/TNF/CYP19A1/IL1B/CYP26B1/PLCD3/PLD4/SPHK1/FABP6/PLAAT1/PLA2G4D/LEP/PLA2G4A/NCEH1/FGF23/CLPSL1/PLA2G4F/ADRA2A/PLA2G2D/CLPS/CYP24A1	62	0.762001
BP	GO:0010769	regulation of cell morphogenesis involved in differentiation	57/2423	301/18670	0.00201335	0.0151257	0.0110915	UST/MT3/CUX2/TNR/CARMIL1/TBR1/PLXNA3/EPHA7/LIMK1/ISLR2/NEUROG3/SEMA6D/NLGN3/PTPRO/POU3F2/TLX2/SEMA3D/BDNF/TRIM46/CHODL/KEL/LRRC4C/NTRK3/SEMA4D/FLNA/GRIN1/FBLN1/SEMA4A/NKX6-1/SPP1/MELTF/SLIT2/DBN1/UNC13D/HAS2/OLFM1/CRABP2/ADGRB3/SEMA6A/PDPN/L1CAM/PLXNB3/TACSTD2/SHOX2/LRP8/SEMA3A/NTRK2/POSTN/SLITRK1/EPHB3/NLGN1/SEMA3E/LPAR3/SEMA3C/EFNA5/NEFL/OLFM4	57	6.49021
BP	GO:0003279	cardiac septum development	26/2423	112/18670	0.00204007	0.0152297	0.0111678	TBX3/PTK7/SLIT3/JAG1/TBX5/TBX1/GATA3/TBX20/SALL4/ANK2/BMP5/TGFB2/SLIT2/FZD1/SOX4/NOG/FZD2/SOX11/MSX2/ISL1/XIRP2/VANGL2/NKX2-5/STRA6/SEMA3C/BMP7	26	4.70679
BP	GO:0032411	positive regulation of transporter activity	26/2423	112/18670	0.00204007	0.0152297	0.0111678	ACTN2/LRRC52/KCNE2/RGN/PON1/TREM2/LRRC26/HAP1/NLGN3/CACNA2D1/CACNB3/ANK2/P2RY6/IFNG/PTAFR/TESC/LRRC38/ANK3/GAL/STAC/SYNGR3/STAC2/WNK2/TRDN/HTR3A/CFTR	26	3.13786
BP	GO:0042303	molting cycle	26/2423	112/18670	0.00204007	0.0152297	0.0111678	LGR5/DKK4/TERT/KRT14/FGF7/HPSE/IGFBP5/PTGS2/SOX21/DKK1/TNF/TGFB2/FGF10/WNT10A/WNT10B/GAL/HOXC13/CDH3/KRT17/MSX2/FOXN1/KRT16/KRT83/VANGL2/FOXE1/FA2H	26	3.92232
BP	GO:0042633	hair cycle	26/2423	112/18670	0.00204007	0.0152297	0.0111678	LGR5/DKK4/TERT/KRT14/FGF7/HPSE/IGFBP5/PTGS2/SOX21/DKK1/TNF/TGFB2/FGF10/WNT10A/WNT10B/GAL/HOXC13/CDH3/KRT17/MSX2/FOXN1/KRT16/KRT83/VANGL2/FOXE1/FA2H	26	3.92232
BP	GO:1903510	mucopolysaccharide metabolic process	26/2423	112/18670	0.00204007	0.0152297	0.0111678	UST/CSGALNACT1/DCN/OGN/TGFB1/CHST1/XYLT1/OMD/PRELP/CHST6/CHST11/ITIH6/CHST3/ACAN/CEMIP/B3GNT7/IL1B/HAS1/HGF/FMOD/B3GNT3/LUM/HAS2/CHST5/VCAN/ITIH5	26	4.70679
BP	GO:0006790	sulfur compound metabolic process	68/2423	372/18670	0.00204622	0.0152565	0.0111874	GSTM1/SULT4A1/GADL1/CTH/GNMT/GLYAT/UST/SULT1B1/AASS/ACSM5/PDK4/ACSM2A/ACSM2B/ACSL6/MTHFD1/ACSL5/BAAT/BHMT/SLC5A6/AADAT/ACSM6/GSTZ1/CPS1/SULT2A1/ADI1/MAT1A/CDO1/ACSM3/ACOT6/GCDH/CSGALNACT1/ACSS1/DCN/FAR1/OGN/PDP1/HS3ST5/CHST1/ACOT11/XYLT1/CHST8/PTGES/MICAL1/OMD/PRELP/CHST6/CHST11/SNCA/TKTL1/CHST3/ACAN/G6PD/GAL3ST4/GSTP1/B3GNT7/SULT1C4/DPEP1/FMOD/B3GNT3/LUM/HACD1/ELOVL7/CHST5/ELOVL4/VCAN/SCD5/GGT6/…	68	0.970143
BP	GO:0035588	G protein-coupled purinergic receptor signaling pathway	9/2423	24/18670	0.00214673	0.0158169	0.0115983	GPR171/ADCY5/ADORA1/P2RY6/PTAFR/ADORA2B/P2RY12/P2RY4/P2RY10	9	3
BP	GO:0042104	positive regulation of activated T cell proliferation	9/2423	24/18670	0.00214673	0.0158169	0.0115983	IGF1/IL12RB1/TNFSF9/IL2/CD24/IL18/IL12B/IL2RA/HHLA2	9	2.33333
BP	GO:0043302	positive regulation of leukocyte degranulation	9/2423	24/18670	0.00214673	0.0158169	0.0115983	IL13/FGR/ITGB2/ITGAM/PTAFR/ADORA2B/SYK/CD177/CRHR1	9	2.33333
BP	GO:0050857	positive regulation of antigen receptor-mediated signaling pathway	9/2423	24/18670	0.00214673	0.0158169	0.0115983	NFAM1/LCK/PRKCB/TESPA1/PTPRC/TRAT1/CCR7/KCNN4/STAP1	9	3
BP	GO:1901071	glucosamine-containing compound metabolic process	9/2423	24/18670	0.00214673	0.0158169	0.0115983	CHIA/CHST1/RENBP/CHST6/MGAT3/CHST3/CHST5/CHIT1/CHST4	9	3
BP	GO:0001914	regulation of T cell mediated cytotoxicity	11/2423	33/18670	0.0021481	0.0158169	0.0115983	RIPK3/LILRB1/IL12RB1/IL12A/CD1C/PTPRC/IL7R/IL12B/CD1E/CD1B/CD1A	11	3.31662
BP	GO:0019934	cGMP-mediated signaling	11/2423	33/18670	0.0021481	0.0158169	0.0115983	PDE11A/HTR2B/AQP1/PDE10A/PDZD3/CGAS/ADORA2B/NPPB/MTNR1B/RUNDC3A/HTR2C	11	2.11058
BP	GO:0042339	keratan sulfate metabolic process	11/2423	33/18670	0.0021481	0.0158169	0.0115983	OGN/CHST1/OMD/PRELP/CHST6/ACAN/B3GNT7/FMOD/B3GNT3/LUM/CHST5	11	3.31662
BP	GO:0060603	mammary gland duct morphogenesis	11/2423	33/18670	0.0021481	0.0158169	0.0115983	ESR1/TBX3/AR/CCL11/CAV3/TGFB1/AREG/FGF10/GLI2/MSX2/DDR1	11	1.50756
BP	GO:1901186	positive regulation of ERBB signaling pathway	11/2423	33/18670	0.0021481	0.0158169	0.0115983	EPGN/FASLG/HAP1/ADORA1/NCF1/PLAUR/MMP9/TGFA/ADRA2A/EREG/AGR2	11	3.31662
BP	GO:0006068	ethanol catabolic process	6/2423	12/18670	0.00217839	0.0159211	0.0116747	SULT1B1/ADH7/ALDH2/SULT2A1/SULT1C4/ALDH3B2	6	-0.816497
BP	GO:0038110	interleukin-2-mediated signaling pathway	6/2423	12/18670	0.00217839	0.0159211	0.0116747	IL2RB/IL2/JAK3/IL2RG/SYK/IL2RA	6	2.44949
BP	GO:0042340	keratan sulfate catabolic process	6/2423	12/18670	0.00217839	0.0159211	0.0116747	OGN/OMD/PRELP/ACAN/FMOD/LUM	6	2.44949
BP	GO:0042659	regulation of cell fate specification	6/2423	12/18670	0.00217839	0.0159211	0.0116747	AR/DKK1/FGFR1/FZD7/SFRP2/ESRP1	6	1.63299
BP	GO:0072540	T-helper 17 cell lineage commitment	6/2423	12/18670	0.00217839	0.0159211	0.0116747	SLAMF6/IL12RB1/LY9/IL6/IL12B/IRF4	6	2.44949
BP	GO:2001223	negative regulation of neuron migration	6/2423	12/18670	0.00217839	0.0159211	0.0116747	ADGRG1/NEXMIF/GPR173/ERBB4/COL3A1/NRG3	6	2.44949
BP	GO:0043406	positive regulation of MAP kinase activity	50/2423	258/18670	0.00224068	0.0163561	0.0119937	PROK1/SAA1/HTR2B/GADD45G/IGF1/MAP4K1/EPGN/MAP3K15/C1QTNF2/PDE5A/ADAM8/TGFB3/PIK3CG/IQGAP1/TGFB1/CCL19/GRM1/RASGRP1/FPR1/ADORA1/CD24/PTPRC/PROK2/NTRK3/FGF1/ADORA2B/SYK/ROR2/TNFRSF11A/NRK/MAPK10/DKK1/INAVA/TNF/FGF10/IL1B/MUC20/HGF/GRM4/FGFR1/MST1R/TGFA/LPAR1/ERN2/ADRA2A/VANGL2/BIRC7/CHRNA7/LPAR3/WNT7B	50	5.65685
BP	GO:0006040	amino sugar metabolic process	12/2423	38/18670	0.00230834	0.016788	0.0123104	CSGALNACT1/CHIA/CHST1/RENBP/CHST6/MGAT3/CHST3/UAP1L1/GFPT2/CHST5/CHIT1/CHST4	12	3.4641
BP	GO:0032094	response to food	12/2423	38/18670	0.00230834	0.016788	0.0123104	CYP1A1/MT3/G6PC/LRCOL1/CPS1/CLPSL2/G6PD/PRKCG/LEP/CLPSL1/GAST/CLPS	12	0.57735
BP	GO:0055069	zinc ion homeostasis	12/2423	38/18670	0.00230834	0.016788	0.0123104	MT1B/MT1X/MT1M/MT2A/MT1G/MT3/MT1E/MT1H/SLC30A2/S100A9/LCK/SLC30A8	12	-1.73205
BP	GO:0055067	monovalent inorganic cation homeostasis	33/2423	154/18670	0.0023354	0.0169639	0.0124394	CYP11B2/SLC12A1/SLC9C2/PDK4/SLC4A1/CYP4A11/ATP6V0E2/SLC4A8/FASLG/SLC9A5/SLC9A3/ADORA1/RAB39A/ATP6V1B1/SLAMF8/ATP6V0D2/NPPB/SCN7A/RAB38/KCNJ10/KCNH2/SLC9A4/ATP1A4/TFAP2B/DRD2/ATP1A3/SLC4A11/SLC9C1/CCKBR/ATP12A/TAC1/SLC4A3/CFTR	33	3.30748
BP	GO:0021915	neural tube development	34/2423	160/18670	0.00234196	0.0169907	0.012459	MTHFD1/PTK7/FOXB1/TEAD2/GSC/TGFB1/DACT1/SALL4/SFRP1/GPR161/GLI3/TWIST1/PRICKLE1/BMP5/TGFB2/FZD1/EN1/WNT1/SOX4/CTHRC1/GLI2/SFRP2/NOG/FZD2/FOLR1/SOX11/VANGL2/SPINT2/OVOL2/ALX1/SEMA3C/BMP7/SPINT1/GRHL2	34	5.48795
BP	GO:0001502	cartilage condensation	8/2423	20/18670	0.00234976	0.0170264	0.0124852	MGP/ROR2/ACAN/FGF4/BMPR1B/ALX1/COL11A1/BARX2	8	2.82843
BP	GO:0071320	cellular response to cAMP	15/2423	53/18670	0.00236688	0.0171295	0.0125608	AQP8/AQP9/ADIPOQ/CPS1/AANAT/PIK3CG/AQP1/IGFBP5/PTAFR/PENK/HCN1/WNT10B/SLC5A5/HCN4/CFTR	15	1.80739
BP	GO:0043616	keratinocyte proliferation	13/2423	43/18670	0.00238642	0.0172288	0.0126336	REG3A/KRT2/AREG/FGF7/EPPK1/BCL11B/SDR16C5/FGF10/REG3G/HAS2/CDH3/OVOL2/EREG	13	3.05085
BP	GO:0099054	presynapse assembly	13/2423	43/18670	0.00238642	0.0172288	0.0126336	NLGN3/SLITRK2/NTRK3/SNCA/NTNG2/GPC4/LRFN4/DKK1/FZD1/CBLN2/NRXN1/SLITRK1/NLGN1	13	3.60555
BP	GO:0060324	face development	14/2423	48/18670	0.00240059	0.0172675	0.012662	MYH3/TGFB3/TBX1/HOXB3/TGFB1/DLX5/PDGFRA/DKK1/MMP2/COL1A1/NOG/PAX9/STRA6/GRHL2	14	3.20713
BP	GO:0002295	T-helper cell lineage commitment	7/2423	16/18670	0.00240928	0.0172675	0.012662	SLAMF6/IL12RB1/LY9/SPN/IL6/IL12B/IRF4	7	2.64575
BP	GO:0007567	parturition	7/2423	16/18670	0.00240928	0.0172675	0.012662	CYP1A1/PTGFR/LDOC1/PTAFR/OXTR/NRK/CRHR1	7	1.88982
BP	GO:0019372	lipoxygenase pathway	7/2423	16/18670	0.00240928	0.0172675	0.012662	PON1/PTGS2/ALOX5AP/ALOX12B/ALOX15B/ALOX5/ALOXE3	7	1.88982
BP	GO:0051923	sulfation	7/2423	16/18670	0.00240928	0.0172675	0.012662	UST/SULT1B1/SULT2A1/HS3ST5/SULT1C4/CHST5/CHST4	7	0.377964
BP	GO:0060572	morphogenesis of an epithelial bud	7/2423	16/18670	0.00240928	0.0172675	0.012662	AR/FGF10/WNT2/GLI2/NOG/SULF1/BMP7	7	1.88982
BP	GO:0030148	sphingolipid biosynthetic process	24/2423	102/18670	0.00245801	0.0175742	0.0128869	ACER1/B3GALT1/CERKL/HACD4/ST8SIA2/ST8SIA1/P2RX1/GAL3ST1/DEGS2/PLPP2/ALOX12B/TNF/SPHK1/HACD1/ELOVL7/ELOVL4/ST6GALNAC5/SPTSSB/UGT8/B3GALT2/ALOXE3/SGPP2/ALDH3B2/FA2H	24	4.08248
BP	GO:2000379	positive regulation of reactive oxygen species metabolic process	24/2423	102/18670	0.00245801	0.0175742	0.0128869	ACE2/RGN/RIPK3/ITGB2/TGFB1/CLEC7A/PTX3/ITGAM/FPR2/MMP8/IFNG/SYK/GRIN1/PTGS2/SNCA/ADGRB1/TNF/ACOD1/GSTP1/IL1B/LEP/CD177/DUOXA1/DUOXA2	24	4.08248
BP	GO:0030166	proteoglycan biosynthetic process	18/2423	69/18670	0.00250038	0.017834	0.0130775	UST/IGF1/CSGALNACT1/DCN/HS3ST5/XYLT1/CHST8/CHST11/HS3ST1/CHST3/ACAN/GAL3ST4/HS6ST2/FOXL1/BMPR1B/VCAN/VANGL2/HS3ST6	18	3.29983
BP	GO:0070227	lymphocyte apoptotic process	18/2423	69/18670	0.00250038	0.017834	0.0130775	RAG1/RIPK3/LGALS9/FASLG/ADAM8/PRKCQ/TNFRSF21/IL2/IL10/JAK3/IL7R/GLI3/CD3G/CD27/IL2RA/PDCD1/BIRC7/LGALS14	18	3.77124
BP	GO:1904063	negative regulation of cation transmembrane transport	22/2423	91/18670	0.00254624	0.0181353	0.0132983	ACTN2/KCNE2/CAV3/CBARP/TGFB1/CACNB3/KEL/GEM/KCNE4/TWIST1/RRAD/KCNH2/SLN/ANK3/RGS2/RGS4/MTNR1B/MMP9/DRD2/ADRA2A/TRDN/CRHR1	22	3.83761
BP	GO:1903708	positive regulation of hemopoiesis	38/2423	185/18670	0.00254874	0.0181353	0.0132983	RAG1/TREM2/LGALS9/CD86/ZAP70/JAG1/NCKAP1L/ADAM8/IL12RB1/EVI2B/IL12A/SASH3/GATA3/TNFSF9/TGFB1/CCL19/IL2/MYB/TESPA1/RASGRP1/PTPRC/IL18/IL7R/IFNG/GLI3/SYK/LILRB4/ROR2/IL12B/TESC/CD27/IL2RA/TNF/CD80/MMP14/SCIN/GLI2/LIF	38	5.83997
BP	GO:0035296	regulation of tube diameter	31/2423	143/18670	0.00257859	0.0182817	0.0134057	DRD1/ACE2/DRD5/ADRA1A/HTR2B/CPS1/HTR7/ASIC2/KCNMB4/P2RX1/AVPR1B/GUCY1A1/FOXC2/KEL/ADORA1/PTAFR/OXTR/ADORA2B/UTS2/PTGS2/CD38/NPPB/HRH2/RGS2/UTS2B/MTNR1B/LEP/ADRA2A/COMP/CHGA/NTS	31	3.4125
BP	GO:0050880	regulation of blood vessel size	31/2423	143/18670	0.00257859	0.0182817	0.0134057	DRD1/ACE2/DRD5/ADRA1A/HTR2B/CPS1/HTR7/ASIC2/KCNMB4/P2RX1/AVPR1B/GUCY1A1/FOXC2/KEL/ADORA1/PTAFR/OXTR/ADORA2B/UTS2/PTGS2/CD38/NPPB/HRH2/RGS2/UTS2B/MTNR1B/LEP/ADRA2A/COMP/CHGA/NTS	31	3.4125
BP	GO:0097746	regulation of blood vessel diameter	31/2423	143/18670	0.00257859	0.0182817	0.0134057	DRD1/ACE2/DRD5/ADRA1A/HTR2B/CPS1/HTR7/ASIC2/KCNMB4/P2RX1/AVPR1B/GUCY1A1/FOXC2/KEL/ADORA1/PTAFR/OXTR/ADORA2B/UTS2/PTGS2/CD38/NPPB/HRH2/RGS2/UTS2B/MTNR1B/LEP/ADRA2A/COMP/CHGA/NTS	31	3.4125
BP	GO:0060135	maternal process involved in female pregnancy	17/2423	64/18670	0.0026474	0.0187471	0.013747	ESR1/DSG1/AR/LGALS9/AKR1B1/STC2/DSG2/LDOC1/HAVCR2/PTGS2/SPP1/RGS2/PTGIS/LIF/ITGA3/HMX3/MMP7	17	2.66789
BP	GO:0043523	regulation of neuron apoptotic process	42/2423	210/18670	0.00265341	0.0187672	0.0137618	ASCL1/MT3/KCNB1/RETREG1/PPARGC1A/GDNF/TERT/FOXB1/FASLG/ADAM8/TGFB3/EPHA7/GATA3/CORO1A/MYB/BDNF/FGF20/ITGAM/PITX3/PTPRZ1/GRIN1/SNCA/G6PD/EN2/TNF/TGFB2/SNCB/EN1/PRKCG/NTF4/GRM4/TFAP2A/TYRO3/TFAP2B/MTNR1B/FAIM2/EGLN3/ISL1/GRID2/NTRK2/NEFL/GABRA5	42	4.32049
BP	GO:0014020	primary neural tube formation	23/2423	97/18670	0.00269255	0.0190214	0.0139481	MTHFD1/PTK7/TEAD2/TGFB1/SALL4/SFRP1/TWIST1/PRICKLE1/BMP5/TGFB2/FZD1/CTHRC1/SFRP2/NOG/FZD2/FOLR1/VANGL2/SPINT2/OVOL2/ALX1/BMP7/SPINT1/GRHL2	23	4.3788
BP	GO:0034764	positive regulation of transmembrane transport	41/2423	204/18670	0.00269765	0.0190347	0.0139579	ACTN2/LRRC52/DRD1/SLC1A2/IL13/FXYD1/ADIPOQ/KCNE2/IGF1/RGN/TERT/TREM2/FGF19/C1QTNF2/LRRC26/HAP1/NLGN3/CACNA2D1/CACNB3/CXCL9/ANK2/P2RY6/IFNG/PTAFR/FLNA/SNCA/TESC/CEMIP/G6PD/KCNH2/CD19/LRRC38/ANK3/GAL/STAC/STAC2/CALCR/WNK2/TRDN/HTR3A/CFTR	41	2.9673
BP	GO:0002698	negative regulation of immune effector process	27/2423	120/18670	0.0027258	0.0192104	0.0140867	C4BPA/C4BPB/LGALS9/IL13RA2/LILRB1/TGFB3/CD84/TGFB1/IL2/IL10/FCRL3/JAK3/CR1/PTPRC/PGLYRP3/IL7R/HAVCR2/SLAMF8/KIR2DL4/IL2RA/TNF/CD22/TGFB2/ABR/PGLYRP4/SERPINB4/FOXJ1	27	4.42635
BP	GO:0030216	keratinocyte differentiation	57/2423	305/18670	0.00273032	0.0192194	0.0140933	REG3A/ACER1/KRTAP10-6/EXPH5/DSG1/LCE2D/JAG1/KRTAP5-1/KRT2/PKP1/DSG2/PI3/KRT14/KRTAP5-5/KRT23/CTSK/KRT9/KRT36/SPRR1A/BCL11B/KRT78/KRT5/KRT15/KRT6B/SPRR3/CYP26B1/KLK13/EVPL/REG3G/TGM5/SCEL/KRT13/CDH3/SPRR1B/ABCA12/ALOX15B/KRT7/KRT40/KRT28/KRT75/KRT17/MSX2/KRTAP4-1/DSC3/KRT79/FOXN1/KRT16/KRT83/KRTAP1-1/KRT4/OVOL2/KRT20/KRT80/EREG/GRHL2/PKP3/KRT19	57	5.9604
BP	GO:0042446	hormone biosynthetic process	21/2423	86/18670	0.00276995	0.0194572	0.0142677	CYP11B2/CYP3A4/TG/HSD11B1/SRD5A2/PPARGC1A/HSD17B6/POR/TRERF1/AKR1B1/AANAT/STC2/CHST8/IFNG/DUOX1/SLC44A4/BMP5/TNF/CYP19A1/IL1B/DUOX2	21	1.09109
BP	GO:0044272	sulfur compound biosynthetic process	39/2423	192/18670	0.00277705	0.0194572	0.0142677	GSTM1/CTH/UST/PDK4/ACSL6/MTHFD1/ACSL5/BHMT/GSTZ1/ADI1/MAT1A/CDO1/GCDH/CSGALNACT1/ACSS1/DCN/OGN/PDP1/CHST1/XYLT1/OMD/PRELP/CHST6/CHST11/SNCA/CHST3/ACAN/GSTP1/B3GNT7/FMOD/B3GNT3/LUM/HACD1/ELOVL7/CHST5/ELOVL4/VCAN/SCD5/GGT6	39	2.08167
BP	GO:0001658	branching involved in ureteric bud morphogenesis	16/2423	59/18670	0.00278054	0.0194572	0.0142677	GDNF/HNF1B/ADAMTS16/HOXB7/TGFB1/FGF1/GLI3/HOXA11/WNT1/FOXD1/NOG/TACSTD2/EYA1/LHX1/HOXD11/SIX2	16	3.5
BP	GO:0032732	positive regulation of interleukin-1 production	16/2423	59/18670	0.00278054	0.0194572	0.0142677	SAA1/LGALS9/PANX3/PYHIN1/PYDC1/CLEC7A/CCL19/HAVCR2/IFNG/NLRP7/MNDA/INAVA/TLR8/AIM2/ISL1/NLRP2	16	3.5
BP	GO:0043388	positive regulation of DNA binding	16/2423	59/18670	0.00278054	0.0194572	0.0142677	IGF1/NIBAN2/PYHIN1/PDX1/GATA3/TRIM6/TGFB1/MMP8/IFNG/TWIST1/PLAUR/MMP9/ISL1/HAND2/IRF4/HMGA2	16	3.5
BP	GO:0045444	fat cell differentiation	44/2423	223/18670	0.00279539	0.0195353	0.014325	C1QTNF3/FNDC5/FABP4/ADIG/ADIPOQ/ALDH6A1/PPARGC1A/SLC2A4/JAG1/FFAR4/FFAR2/KLF5/EGR2/GATA3/GDF10/TGFB1/MEDAG/MMP11/UCP1/IL6/SFRP1/ID4/PTGS2/CCN4/RETN/TPH1/GNB3/CTBP2/TNF/FGF10/PLAC8/WNT1/WNT10B/RGS2/TFAP2B/LEP/SFRP2/MSX2/GLIS1/IL11/C1QL4/HTR2C/ALOXE3/HMGA2	44	4.22116
BP	GO:0019228	neuronal action potential	11/2423	34/18670	0.0028082	0.0195353	0.014325	CACNA1I/DRD1/P2RX3/KCNMB4/P2RX1/SCN7A/CHRNA1/CACNA1G/ANK3/MTNR1B/KCND2	11	1.50756
BP	GO:0031128	developmental induction	11/2423	34/18670	0.0028082	0.0195353	0.014325	AR/GDNF/FGF1/HOXA11/DKK1/FGF10/WNT1/FGFR1/HOXC11/WNT2/SIX3	11	2.11058
BP	GO:0045066	regulatory T cell differentiation	11/2423	34/18670	0.0028082	0.0195353	0.014325	LGALS9/TGFB1/IL2/TNFRSF18/CR1/CTLA4/IFNG/LILRB4/IL2RA/FUT7/PLA2G2D	11	3.31662
BP	GO:0070050	neuron cellular homeostasis	11/2423	34/18670	0.0028082	0.0195353	0.014325	SLC6A2/HAAO/P2RX1/IL6/ADORA1/CALB1/P2RY4/CHRNA1/MAP1A/TYRO3/CALB2	11	2.11058
BP	GO:0042552	myelination	29/2423	132/18670	0.00283049	0.0196673	0.0144217	TG/BCAS1/PMP22/ADAM22/TSPAN2/EGR2/POU3F2/TNFRSF21/PLP1/GAL3ST1/TGFB1/ANK2/KEL/NTRK3/OLIG2/ID4/CNTNAP1/PTPRZ1/MARVELD1/S100B/KCNJ10/HGF/KLK6/ZNF488/TENM4/LPAR1/NTRK2/UGT8/FA2H	29	5.01377
BP	GO:0030832	regulation of actin filament length	37/2423	180/18670	0.0028409	0.0197164	0.0144578	ACTN2/CTNNA2/LMOD2/RHOBTB1/COTL1/SH3BP1/CARMIL1/SPIRE1/CCL11/NCKAP1L/NEB/BAIAP2L2/HCK/PLEK/CORO1A/ADD2/SPTB/NCK2/CAPG/KIRREL1/MAGEL2/PFN2/CARMIL2/CCR7/ARHGAP28/FMN1/CCL26/SLIT2/DBN1/SCIN/SPTA1/TMSB15B/CRACD/PLEKHH2/FHOD3/FMN2/ARHGAP40	37	4.76757
BP	GO:0006066	alcohol metabolic process	66/2423	364/18670	0.00288323	0.0199224	0.0146088	CYP11B2/CYP3A4/CYP1A2/ACER1/CYP1A1/ADH1B/SULT1B1/SEC14L2/ADH4/MOGAT2/ADH7/MT3/ACADL/CYP39A1/PCK2/SORD/ADH1C/APOF/CYP7A1/APOA5/ADH6/LEPR/IGF1/APOC1/RDH5/TTR/ALDH2/ADH1A/POR/HAO1/PON1/RDH16/SULT2A1/LCAT/TRERF1/AKR1B1/ACSS1/PLEK/P2RY6/DEGS2/IFNG/PTAFR/FGF1/INPP5J/ISYNA1/MIOX/SNCA/SDR16C5/APOA4/MYOF/GNB3/G6PD/BMP5/TNF/IL1B/SULT1C4/PLCD3/FGFR1/PLD4/SPHK1/MOXD1/LEP/NUDT11/SGPP2/CFTR/ALDH3B2	66	-0.246183
BP	GO:0035150	regulation of tube size	31/2423	144/18670	0.00288632	0.0199224	0.0146088	DRD1/ACE2/DRD5/ADRA1A/HTR2B/CPS1/HTR7/ASIC2/KCNMB4/P2RX1/AVPR1B/GUCY1A1/FOXC2/KEL/ADORA1/PTAFR/OXTR/ADORA2B/UTS2/PTGS2/CD38/NPPB/HRH2/RGS2/UTS2B/MTNR1B/LEP/ADRA2A/COMP/CHGA/NTS	31	3.4125
BP	GO:0010524	positive regulation of calcium ion transport into cytosol	15/2423	54/18670	0.00289076	0.0199224	0.0146088	DRD1/IL13/P2RX2/P2RX3/HAP1/P2RX5/CXCL9/TRPC3/P2RY6/GRIN1/SNCA/CEMIP/CD19/CALCR/TRDN	15	1.80739
BP	GO:0032663	regulation of interleukin-2 production	15/2423	54/18670	0.00289076	0.0199224	0.0146088	CD86/PRKCQ/SASH3/GATA3/CD3E/CLEC7A/HOMER3/PTPRC/HAVCR2/IL1A/IL1B/CD80/CARD11/IRF4/VTCN1	15	3.87298
BP	GO:0046164	alcohol catabolic process	15/2423	54/18670	0.00289076	0.0199224	0.0146088	SULT1B1/ADH4/ADH7/MT3/CYP39A1/SORD/CYP7A1/ALDH2/HAO1/SULT2A1/TRERF1/INPP5J/MIOX/SULT1C4/ALDH3B2	15	-1.29099
BP	GO:0070206	protein trimerization	15/2423	54/18670	0.00289076	0.0199224	0.0146088	C1QTNF3/SLC1A2/ADIPOQ/P2RX3/C1QTNF2/C1QTNF1/TRIM6/COL6A2/EMILIN1/TCL1A/SLC1A5/ALOX5AP/COL1A2/COL1A1/SCARA5	15	1.80739
BP	GO:0030049	muscle filament sliding	12/2423	39/18670	0.00294644	0.0202262	0.0148316	ACTN2/MYH3/NEB/MYL2/MYH2/MYH6/TNNI2/DES/TNNI3/MYH7/MYBPC2/TNNT1	12	2.3094
BP	GO:0033275	actin-myosin filament sliding	12/2423	39/18670	0.00294644	0.0202262	0.0148316	ACTN2/MYH3/NEB/MYL2/MYH2/MYH6/TNNI2/DES/TNNI3/MYH7/MYBPC2/TNNT1	12	2.3094
BP	GO:2000826	regulation of heart morphogenesis	12/2423	39/18670	0.00294644	0.0202262	0.0148316	JAG1/TBX5/FOXC2/TWIST1/DKK1/TGFB2/NOG/ISL1/HAND2/EYA1/SEMA3C/BMP7	12	3.4641
BP	GO:0051271	negative regulation of cellular component movement	69/2423	384/18670	0.00295911	0.0202262	0.0148316	ADIPOQ/RGN/PPARGC1A/SPRED1/SINHCAF/DNAJA4/JAG1/CCL28/PLXNA3/DCN/NBL1/APOD/TBX5/GREM1/GATA3/SEMA6D/PTPRO/ADGRG1/GPR18/TGFB1/NEXMIF/PADI2/SEMA3D/LIMCH1/EPPK1/PFN2/SFRP1/ADORA1/MMP28/PTGER4/DPYSL3/EMILIN1/SEMA4D/PODN/IGFBP5/SLAMF8/FBLN1/MITF/SEMA4A/STAP1/ADGRB1/BMP5/PKHD1/GPR173/CYP19A1/GSTP1/ABR/SLIT2/HAS1/DPEP1/GCSAM/ERBB4/COL3A1/SEMA6A/SFRP2/ALOX15B/PLXNB3/NOG/TACSTD2/SULF1/DRD2/SEMA3A/FRMD5/KRT1…	69	7.58431
BP	GO:2001259	positive regulation of cation channel activity	18/2423	70/18670	0.00296525	0.0202262	0.0148316	ACTN2/LRRC52/KCNE2/TREM2/LRRC26/HAP1/NLGN3/CACNA2D1/CACNB3/ANK2/P2RY6/IFNG/LRRC38/ANK3/GAL/STAC/STAC2/TRDN	18	2.82843
BP	GO:0035094	response to nicotine	14/2423	49/18670	0.00296612	0.0202262	0.0148316	IL13/CHRNA4/PDX1/PENK/CHRNA5/SLC6A3/CHRNA6/NKX6-1/TNF/CHRNA1/DRD2/CHRND/CHRNA7/PPP1R1B	14	2.67261
BP	GO:0050901	leukocyte tethering or rolling	9/2423	25/18670	0.00297243	0.0202262	0.0148316	SELE/CCL28/ITGA4/ADD2/SPN/PTAFR/TNF/GCNT1/LEP	9	2.33333
BP	GO:0060444	branching involved in mammary gland duct morphogenesis	9/2423	25/18670	0.00297243	0.0202262	0.0148316	ESR1/TBX3/AR/CCL11/CAV3/TGFB1/AREG/MSX2/DDR1	9	1
BP	GO:0060561	apoptotic process involved in morphogenesis	9/2423	25/18670	0.00297243	0.0202262	0.0148316	HNF1B/SPI1/CRYAB/FOXC2/TGFB2/FGF4/HAND2/NKX2-5/BMP7	9	3
BP	GO:0060571	morphogenesis of an epithelial fold	9/2423	25/18670	0.00297243	0.0202262	0.0148316	AR/BMP5/FGF10/WNT2/GLI2/NOG/SULF1/OVOL2/BMP7	9	2.33333
BP	GO:2000679	positive regulation of transcription regulatory region DNA binding	9/2423	25/18670	0.00297243	0.0202262	0.0148316	IGF1/NIBAN2/GATA3/TRIM6/TGFB1/IFNG/TWIST1/HAND2/HMGA2	9	2.33333
BP	GO:0014003	oligodendrocyte development	13/2423	44/18670	0.00299118	0.0203304	0.014908	ASCL1/PLP1/TGFB1/ID4/CNTNAP1/PRDM8/GSTP1/KCNJ10/ZNF488/SOX11/TENM4/LPAR1/FA2H	13	3.05085
BP	GO:0048708	astrocyte differentiation	20/2423	81/18670	0.00300507	0.0204014	0.0149601	DRD1/MT3/TREM2/ROR1/TSPAN2/POU3F2/PLP1/IL6/FPR2/NTRK3/ID4/IFNG/ROR2/SERPINE2/S100B/TNF/IL1B/BACE2/NOG/LIF	20	3.57771
BP	GO:0006026	aminoglycan catabolic process	17/2423	65/18670	0.00315962	0.021426	0.0157114	DCN/OGN/TGFB1/CHIA/HPSE/PGLYRP3/OMD/PRELP/ACAN/GPC4/CEMIP/GPC2/FMOD/LUM/CHIT1/VCAN/PGLYRP4	17	4.12311
BP	GO:0006720	isoprenoid metabolic process	30/2423	139/18670	0.00320864	0.0217087	0.0159187	CYP3A4/CYP1A2/CYP1A1/CYP2E1/UGT1A3/ADH1B/CYP2C9/ADH4/CYP2C8/ADH7/ADH1C/APOC3/ADH6/RDH5/TTR/ADH1A/RDH16/AKR1B1/UGT1A8/RBP2/CRABP1/SDR16C5/APOA4/GPC4/CYP26B1/GPC2/CRABP2/LRP8/STRA6/CLPS	30	-0.730297
BP	GO:0051588	regulation of neurotransmitter transport	30/2423	139/18670	0.00320864	0.0217087	0.0159187	DRD1/CAMK2A/SYT9/ADRA1A/CHRNA4/GDNF/SNCG/KCNMB4/LILRB1/P2RX1/APBA2/PRKCB/RIMS4/PFN2/ADORA2B/SNCAIP/CHRNA5/SV2A/SNCA/P2RY4/CHRNA6/PRKCG/RGS2/STXBP5L/RGS4/SYT4/DRD2/UNC13A/HTR2C/NLGN1	30	3.28634
BP	GO:0032414	positive regulation of ion transmembrane transporter activity	24/2423	104/18670	0.00322248	0.0217279	0.0159327	ACTN2/LRRC52/KCNE2/RGN/TREM2/LRRC26/HAP1/NLGN3/CACNA2D1/CACNB3/ANK2/P2RY6/IFNG/PTAFR/TESC/LRRC38/ANK3/GAL/STAC/STAC2/WNK2/TRDN/HTR3A/CFTR	24	3.26599
BP	GO:0046928	regulation of neurotransmitter secretion	24/2423	104/18670	0.00322248	0.0217279	0.0159327	DRD1/CAMK2A/SYT9/ADRA1A/CHRNA4/SNCG/KCNMB4/P2RX1/APBA2/PRKCB/RIMS4/PFN2/ADORA2B/SNCAIP/CHRNA5/SNCA/P2RY4/CHRNA6/PRKCG/STXBP5L/SYT4/DRD2/UNC13A/NLGN1	24	2.85774
BP	GO:0071887	leukocyte apoptotic process	24/2423	104/18670	0.00322248	0.0217279	0.0159327	RAG1/RIPK3/LGALS9/FASLG/ADAM8/LILRB1/PRKCQ/TNFRSF21/PIK3CD/CCL19/IL2/IL10/IL6/JAK3/CCR5/IL7R/CCR7/GLI3/CD3G/CD27/IL2RA/PDCD1/BIRC7/LGALS14	24	4.49073
BP	GO:0030509	BMP signaling pathway	33/2423	157/18670	0.00322642	0.0217297	0.0159341	TMEM100/GREM2/HJV/NBL1/GREM1/CRB2/MYH6/RUNX2/SFRP1/DLX5/ROR2/SOST/BMP5/DKK1/FZD1/SFRP4/CHRDL1/WNT1/TFAP2B/HTRA3/FOXD1/SFRP2/NOG/SULF1/SOX11/MSX2/CER1/BMPR1B/COMP/ITGA3/NKX2-5/BMP7/SFRP5	33	4.7001
BP	GO:0061387	regulation of extent of cell growth	25/2423	110/18670	0.00332834	0.0223907	0.0164188	MT3/TNR/PLXNA3/EPHA7/LIMK1/ISLR2/SEMA6D/SEMA3D/BDNF/TRIM46/NTRK3/SEMA4D/SEMA4A/NKX6-1/SPP1/DBN1/OLFM1/CRABP2/SEMA6A/L1CAM/SEMA3A/SEMA3E/LPAR3/SEMA3C/EFNA5	25	4.2
BP	GO:0009713	catechol-containing compound biosynthetic process	8/2423	21/18670	0.00336844	0.022507	0.0165041	DAO/GATA3/SLC6A3/SNCA/TGFB2/MOXD1/INSM1/HAND2	8	2.12132
BP	GO:0010893	positive regulation of steroid biosynthetic process	8/2423	21/18670	0.00336844	0.022507	0.0165041	CYP7A1/PPARGC1A/POR/CGA/IFNG/FGF1/TNF/IL1B	8	0
BP	GO:0017000	antibiotic biosynthetic process	8/2423	21/18670	0.00336844	0.022507	0.0165041	CYP1A2/CYP1A1/ACSS1/DUOX1/CYBB/DUOXA1/DUOXA2/DUOX2	8	1.41421
BP	GO:0042423	catecholamine biosynthetic process	8/2423	21/18670	0.00336844	0.022507	0.0165041	DAO/GATA3/SLC6A3/SNCA/TGFB2/MOXD1/INSM1/HAND2	8	2.12132
BP	GO:0098743	cell aggregation	8/2423	21/18670	0.00336844	0.022507	0.0165041	MGP/ROR2/ACAN/FGF4/BMPR1B/ALX1/COL11A1/BARX2	8	2.82843
BP	GO:1903055	positive regulation of extracellular matrix organization	8/2423	21/18670	0.00336844	0.022507	0.0165041	TGFB1/FSCN1/IL6/CARMIL2/PHLDB1/EMILIN1/MELTF/PDPN	8	2.82843
BP	GO:0003209	cardiac atrium morphogenesis	10/2423	30/18670	0.00338604	0.0225736	0.0165529	TBX5/MYH6/TBX20/TGFB2/SOX4/WNT2/NOG/SHOX2/ISL1/NKX2-5	10	3.16228
BP	GO:0050869	negative regulation of B cell activation	10/2423	30/18670	0.00338604	0.0225736	0.0165529	TNFRSF21/IL10/SFRP1/SAMSN1/CTLA4/MNDA/TNFRSF13B/INHA/BANK1/FOXJ1	10	3.16228
BP	GO:0030279	negative regulation of ossification	20/2423	82/18670	0.00349938	0.0232798	0.0170708	RANBP3L/GREM1/HOXA2/GDF10/TGFB1/AREG/SFRP1/SEMA4D/IGFBP5/KREMEN2/TWIST1/SOST/TPH1/DKK1/TNF/RORB/NOG/RFLNA/FGF23/HAND2	20	4.02492
BP	GO:1904427	positive regulation of calcium ion transmembrane transport	18/2423	71/18670	0.00349984	0.0232798	0.0170708	DRD1/IL13/KCNE2/RGN/HAP1/CACNA2D1/CACNB3/CXCL9/ANK2/P2RY6/SNCA/CEMIP/G6PD/CD19/STAC/STAC2/CALCR/TRDN	18	2.35702
BP	GO:0046456	icosanoid biosynthetic process	15/2423	55/18670	0.00350652	0.0232981	0.0170841	CYP2C9/CYP2C8/PTGS1/FABP5/PTGES/SYK/PTGS2/ALOX5AP/IL1B/PTGIS/PLA2G4A/PTGDS/ALOX5/PLA2G4F/GGT6	15	2.84019
BP	GO:0034763	negative regulation of transmembrane transport	28/2423	128/18670	0.0035318	0.0234397	0.017188	ACTN2/KCNE2/CAV3/CBARP/TGFB1/PRKCB/FABP5/CACNB3/KEL/GEM/KCNE4/TWIST1/RRAD/TNF/IL1B/KCNH2/SLN/ANK3/RGS2/RGS4/MTNR1B/LEP/MMP9/DRD2/ADRA2A/TRDN/ANO9/CRHR1	28	4.53557
BP	GO:0006766	vitamin metabolic process	29/2423	134/18670	0.00356681	0.0235927	0.0173002	CYP3A4/CYP1A1/AOX1/MTHFD1/RGN/SLC5A6/CTRB1/HAAO/VNN2/SLC52A1/MTHFD2/SLC52A3/RBP2/CRABP1/IFNG/ALDH1L2/SLC2A1/PLTP/ABCC1/TKTL1/TNF/IL1B/CYP26B1/FGFR1/FOLR1/FGF23/CYP24A1/TCN1/PRSS1	29	2.41404
BP	GO:0007272	ensheathment of neurons	29/2423	134/18670	0.00356681	0.0235927	0.0173002	TG/BCAS1/PMP22/ADAM22/TSPAN2/EGR2/POU3F2/TNFRSF21/PLP1/GAL3ST1/TGFB1/ANK2/KEL/NTRK3/OLIG2/ID4/CNTNAP1/PTPRZ1/MARVELD1/S100B/KCNJ10/HGF/KLK6/ZNF488/TENM4/LPAR1/NTRK2/UGT8/FA2H	29	5.01377
BP	GO:0008366	axon ensheathment	29/2423	134/18670	0.00356681	0.0235927	0.0173002	TG/BCAS1/PMP22/ADAM22/TSPAN2/EGR2/POU3F2/TNFRSF21/PLP1/GAL3ST1/TGFB1/ANK2/KEL/NTRK3/OLIG2/ID4/CNTNAP1/PTPRZ1/MARVELD1/S100B/KCNJ10/HGF/KLK6/ZNF488/TENM4/LPAR1/NTRK2/UGT8/FA2H	29	5.01377
BP	GO:0061337	cardiac conduction	31/2423	146/18670	0.00359658	0.0236264	0.0173249	ACE2/CTNNA3/CACNG1/FXYD1/KCNE2/ABCC9/ATP2A3/DSG2/CACNA2D1/CACNB3/ANK2/SCN2B/FLNA/KCNE4/KCNIP1/RYR1/CACNB1/FXYD2/KCNK15/KCNH2/SCN3B/CACNA1G/ATP1A4/ATP1A3/CACNG6/TRDN/KCND2/FXYD3/ITPR3/NKX2-5/HCN4	31	3.4125
BP	GO:0035589	G protein-coupled purinergic nucleotide receptor signaling pathway	6/2423	13/18670	0.00360382	0.0236264	0.0173249	GPR171/P2RY6/PTAFR/P2RY12/P2RY4/P2RY10	6	2.44949
BP	GO:0042908	xenobiotic transport	6/2423	13/18670	0.00360382	0.0236264	0.0173249	SLC47A1/NR1I2/SLC18A1/SLC2A1/ABCC1/SLC6A6	6	0.816497
BP	GO:0045059	positive thymic T cell selection	6/2423	13/18670	0.00360382	0.0236264	0.0173249	ZAP70/CD3E/DOCK2/PTPRC/CD3G/FOXN1	6	2.44949
BP	GO:0045779	negative regulation of bone resorption	6/2423	13/18670	0.00360382	0.0236264	0.0173249	TNFRSF11B/IL6/CD38/UBASH3B/TMEM119/CLDN18	6	2.44949
BP	GO:0070208	protein heterotrimerization	6/2423	13/18670	0.00360382	0.0236264	0.0173249	ADIPOQ/C1QTNF2/C1QTNF1/COL6A2/COL1A2/COL1A1	6	1.63299
BP	GO:0071352	cellular response to interleukin-2	6/2423	13/18670	0.00360382	0.0236264	0.0173249	IL2RB/IL2/JAK3/IL2RG/SYK/IL2RA	6	2.44949
BP	GO:0090179	planar cell polarity pathway involved in neural tube closure	6/2423	13/18670	0.00360382	0.0236264	0.0173249	PTK7/SFRP1/FZD1/SFRP2/FZD2/VANGL2	6	2.44949
BP	GO:0003230	cardiac atrium development	11/2423	35/18670	0.00362232	0.0236598	0.0173494	TBX5/MYH6/TBX20/ANK2/TGFB2/SOX4/WNT2/NOG/SHOX2/ISL1/NKX2-5	11	3.31662
BP	GO:0045104	intermediate filament cytoskeleton organization	14/2423	50/18670	0.00363629	0.0236598	0.0173494	KRT2/PKP1/DES/KRT14/EPPK1/KRT9/EVPL/NEFM/PRPH/KRT17/KRT16/ATP8A2/KRT20/NEFL	14	3.74166
BP	GO:0060425	lung morphogenesis	14/2423	50/18670	0.00363629	0.0236598	0.0173494	RSPO2/FGF7/HHIP/TNF/FGF10/TNC/WNT2/NOG/SOX11/LIF/VANGL2/LAMA1/GRHL2/WNT7B	14	3.20713
BP	GO:0030540	female genitalia development	7/2423	17/18670	0.00364089	0.0236598	0.0173494	ESR1/TBX3/FGF10/CYP19A1/TYRO3/LHX1/STRA6	7	1.13389
BP	GO:0042268	regulation of cytolysis	7/2423	17/18670	0.00364089	0.0236598	0.0173494	GPLD1/CFHR5/CFHR2/LILRB1/TGFB1/PGLYRP3/PGLYRP4	7	0.377964
BP	GO:0043373	CD4-positive, alpha-beta T cell lineage commitment	7/2423	17/18670	0.00364089	0.0236598	0.0173494	SLAMF6/IL12RB1/LY9/SPN/IL6/IL12B/IRF4	7	2.64575
BP	GO:0045072	regulation of interferon-gamma biosynthetic process	7/2423	17/18670	0.00364089	0.0236598	0.0173494	LILRB1/CLEC7A/TLR7/IL12B/TNFRSF13C/TLR8/INHA	7	2.64575
BP	GO:0050665	hydrogen peroxide biosynthetic process	7/2423	17/18670	0.00364089	0.0236598	0.0173494	CYP1A2/CYP1A1/DUOX1/CYBB/DUOXA1/DUOXA2/DUOX2	7	1.13389
BP	GO:0006637	acyl-CoA metabolic process	24/2423	105/18670	0.00367424	0.0238242	0.01747	GLYAT/AASS/ACSM5/PDK4/ACSM2A/ACSM2B/ACSL6/ACSL5/BAAT/AADAT/ACSM6/GSTZ1/ACSM3/ACOT6/GCDH/ACSS1/FAR1/PDP1/ACOT11/SNCA/HACD1/ELOVL7/ELOVL4/SCD5	24	-1.22474
BP	GO:0035383	thioester metabolic process	24/2423	105/18670	0.00367424	0.0238242	0.01747	GLYAT/AASS/ACSM5/PDK4/ACSM2A/ACSM2B/ACSL6/ACSL5/BAAT/AADAT/ACSM6/GSTZ1/ACSM3/ACOT6/GCDH/ACSS1/FAR1/PDP1/ACOT11/SNCA/HACD1/ELOVL7/ELOVL4/SCD5	24	-1.22474
BP	GO:0051932	synaptic transmission, GABAergic	13/2423	45/18670	0.00371513	0.0238867	0.0175158	ADRA1A/CNR2/HAP1/ADORA1/GABRG1/OXTR/GABRA4/GABRA2/DRD2/NPY5R/NLGN1/TAC1/GABRA5	13	3.05085
BP	GO:1903557	positive regulation of tumor necrosis factor superfamily cytokine production	21/2423	88/18670	0.00371555	0.0238867	0.0175158	LGALS9/CD86/ADAM8/CD2/SASH3/SPN/CLEC7A/CCL19/RASGRP1/TNFRSF8/PTPRC/MMP8/HAVCR2/IFNG/PTAFR/CYBB/SYK/IL12B/TWIST1/LEP/ISL1	21	4.58258
BP	GO:2000177	regulation of neural precursor cell proliferation	21/2423	88/18670	0.00371555	0.0238867	0.0175158	ASCL1/ADGRG1/TGFB1/CIP2A/SMARCD3/SHCBP1/LHX5/PITX3/PTPRZ1/GLI3/FLNA/GLI1/RASSF10/GLI2/DRD2/INSM1/VAX1/LHX1/SPINT2/SPINT1/SIX3	21	4.14614
BP	GO:0007618	mating	12/2423	40/18670	0.00372019	0.0238867	0.0175158	EDDM3A/DRD1/DRD5/P2RX1/PI3/OXTR/GRIN1/SERPINE2/OR2H2/NHLH2/TAC1/PPP1R1B	12	1.73205
BP	GO:0014046	dopamine secretion	12/2423	40/18670	0.00372019	0.0238867	0.0175158	SYT9/CHRNA4/GDNF/SNCG/FGF20/SYT3/SNCA/CHRNA6/SYT4/DRD2/SYT8/SYT13	12	1.73205
BP	GO:0014059	regulation of dopamine secretion	12/2423	40/18670	0.00372019	0.0238867	0.0175158	SYT9/CHRNA4/GDNF/SNCG/FGF20/SYT3/SNCA/CHRNA6/SYT4/DRD2/SYT8/SYT13	12	1.73205
BP	GO:0035315	hair cell differentiation	12/2423	40/18670	0.00372019	0.0238867	0.0175158	CLRN1/USH2A/MYCL/JAG1/PDZD7/SLC44A4/SLITRK6/ATOH1/FGFR1/MCOLN3/PITX2/ESRP1	12	1.73205
BP	GO:0051931	regulation of sensory perception	12/2423	40/18670	0.00372019	0.0238867	0.0175158	SMR3A/SMR3B/OPRPN/TMEM100/TAFA4/P2RX3/GRM1/FABP5/CACNB3/IL10/ADORA1/PTAFR	12	0
BP	GO:0072210	metanephric nephron development	12/2423	40/18670	0.00372019	0.0238867	0.0175158	ADIPOQ/GDNF/IRX2/PDGFRA/NPHS2/FMN1/KIF26B/TFAP2B/FOXD1/LIF/LHX1/SIX2	12	2.3094
BP	GO:0006029	proteoglycan metabolic process	22/2423	94/18670	0.0038994	0.0250102	0.0183396	UST/IGF1/CSGALNACT1/DCN/HS3ST5/XYLT1/CHST8/HPSE/ADAMTS12/CHST11/HS3ST1/CHST3/ACAN/GAL3ST4/HS6ST2/FOXL1/SULF1/BMPR1B/VCAN/VANGL2/COL11A1/HS3ST6	22	3.83761
BP	GO:0042113	B cell activation	57/2423	310/18670	0.00393087	0.0251848	0.0184677	IL13/CHRNA4/RAG1/CCR6/ITM2A/ZAP70/NFAM1/NCKAP1L/SASH3/CD70/DOCK10/ITGA4/TNFRSF21/PIK3CD/IKZF3/TNFSF13B/TGFB1/PRKCB/IL2/IL10/GPR183/FCRL3/IL6/JAK3/SFRP1/SAMSN1/PTPRC/CTLA4/IL7R/SLAMF8/SYK/CD38/CD27/MNDA/LAX1/FCRL1/TNFRSF13C/HDAC9/CD22/TNFRSF13B/CARD11/CXCR5/MMP14/INHA/MS4A1/CD19/GAPT/IGLL1/IL11/AICDA/MZB1/CD79A/IGLL5/BANK1/CR2/FOXJ1/CDH17	57	6.75512
BP	GO:0006575	cellular modified amino acid metabolic process	40/2423	202/18670	0.00395589	0.0253177	0.0185651	GSTM1/TG/GNMT/PRODH/SULT1B1/ACADL/MTHFD1/DMGDH/BBOX1/BHMT/SLC5A6/GSTZ1/POR/CGA/VNN2/PLA2G4E/GATA3/OSBPL10/MTHFD2/PTGES/SLC6A8/DUOX1/ALDH1L2/G6PD/GSTP1/DPEP1/CKMT1A/PLA2G4D/SLC5A5/PLA2G4A/EGLN3/FOLR1/PLA2G4F/PLA2G2D/CKMT1B/FOXE1/DUOXA1/DUOXA2/GGT6/DUOX2	40	1.89737
BP	GO:0050921	positive regulation of chemotaxis	29/2423	135/18670	0.00399197	0.025495	0.0186951	VEGFD/TREM2/CCR6/LGALS9/STX3/SMOC2/NCKAP1L/IL12A/TGFB1/CCL19/ARTN/CCR4/RAC2/IL6/FPR2/NTRK3/CCR7/S100A14/P2RY12/CXCL8/F3/CCL26/FGF10/SLIT2/FGFR1/CCL7/CXCL14/LPAR1/SCG2	29	5.01377
BP	GO:0090303	positive regulation of wound healing	16/2423	61/18670	0.00399652	0.025495	0.0186951	REG3A/PLG/SMOC2/PLEK/CLEC7A/FOXC2/HPSE/DUOX1/CCN4/INSL3/F3/REG3G/PDPN/MYOD1/ADRA2A/DUOX2	16	3
BP	GO:2000514	regulation of CD4-positive, alpha-beta T cell activation	16/2423	61/18670	0.00399652	0.025495	0.0186951	LGALS9/CD86/NCKAP1L/PRKCQ/IL12RB1/SASH3/GATA3/CCL19/IL2/MYB/JAK3/IL18/IFNG/IL12B/CD80/IRF4	16	4
BP	GO:0042481	regulation of odontogenesis	9/2423	26/18670	0.00402948	0.0256225	0.0187886	RSPO2/ODAPH/TNFRSF11B/TGFB1/RUNX2/WNT10A/TFAP2A/AMTN/PAX9	9	2.33333
BP	GO:0048843	negative regulation of axon extension involved in axon guidance	9/2423	26/18670	0.00402948	0.0256225	0.0187886	PLXNA3/SEMA6D/SEMA3D/SEMA4D/SEMA4A/SEMA6A/SEMA3A/SEMA3E/SEMA3C	9	3
BP	GO:0055083	monovalent inorganic anion homeostasis	9/2423	26/18670	0.00402948	0.0256225	0.0187886	SLC12A1/FASLG/SLC34A3/CA12/ATP6V1B1/SFRP4/TFAP2B/FGF23/SLC34A2	9	2.33333
BP	GO:0002824	positive regulation of adaptive immune response based on somatic recombination of immune receptors built from immunoglobulin superfamily domains	23/2423	100/18670	0.00405281	0.0257156	0.0188569	HPX/LTA/PRKCQ/IL12RB1/IL12A/CD1C/SASH3/GATA3/TNFSF13B/TGFB1/CCL19/IL2/IL6/PTPRC/IL18/IL12B/TNFRSF13C/CD1E/TNF/IL1B/CD80/CD1B/CD1A	23	4.3788
BP	GO:0022600	digestive system process	23/2423	100/18670	0.00405281	0.0257156	0.0188569	MOGAT2/APOA5/AQP1/KCNN4/OXTR/TIFAB/APOA4/INAVA/FGF10/HRH2/SLC9A4/CRACD/LEP/GCNT3/ADRA2A/VSIG1/CCKBR/TAC1/MUC2/SLC5A1/TFF1/TFF2/MUC6	23	3.96177
BP	GO:0051235	maintenance of location	60/2423	330/18670	0.00407752	0.0258446	0.0189515	DRD1/CIDEA/IL13/APOC4/HTR2B/SLC30A2/FITM1/JPH1/S100A9/JPH3/TRPM2/FASLG/NBL1/LCK/FFAR2/RASA3/HAP1/IKBKE/CORO1A/TGFB1/CCL19/CXCL9/IL10/HILPDA/IL6/CCR5/ANK2/PTPRC/P2RY6/DZIP1/CCR7/FLNA/SNCA/SUN3/RYR1/CEMIP/TNF/IL1B/DBN1/JSRP1/SCIN/CD19/MDFI/ANK3/MCOLN2/TMSB15B/UBASH3B/LEP/DRD2/CER1/FBN2/MCOLN3/FTHL17/HTR2C/TRDN/IGSF11/ITPR3/TRPA1/SLC30A8/SMIM22	60	5.93857
BP	GO:0002286	T cell activation involved in immune response	24/2423	106/18670	0.00417796	0.026453	0.0193976	LGALS9/SLAMF6/CD86/LILRB1/IL12RB1/CD1C/GATA3/CLEC4E/LY9/SPN/CCL19/IL2/MYB/GPR183/IL6/JAK3/PTGER4/IL18/HAVCR2/IFNG/IL12B/SEMA4A/CD80/IRF4	24	4.89898
BP	GO:0032615	interleukin-12 production	15/2423	56/18670	0.00422568	0.0267265	0.0195982	LGALS9/LILRB1/CLEC7A/CCL19/IL10/JAK3/IFNG/CCR7/SYK/IL12B/TIGIT/LTB/TLR8/LEP/ISL1	15	3.87298
BP	GO:0048593	camera-type eye morphogenesis	25/2423	112/18670	0.00427715	0.0270187	0.0198124	COL8A1/JAG1/CABP4/TENM3/PITX3/GLI3/CALB1/TWIST1/HCN1/PTF1A/TFAP2A/TFAP2B/FOXF2/RORB/COL8A2/WNT2/SOX11/WNT9A/LHX1/ATP8A2/STRA6/BMP7/PITX2/SIX3/PROM1	25	5
BP	GO:0061053	somite development	21/2423	89/18670	0.004281	0.0270187	0.0198124	NKD1/RIPPLY1/MTHFD1/FOXB1/CRB2/FOXC2/SFRP1/MEOX1/ROR2/DKK1/HES7/WNT1/RIPPLY2/DMRT2/SFRP2/NOG/SOX11/DLL3/LHX1/CDX2/SEMA3C	21	3.27327
BP	GO:0005996	monosaccharide metabolic process	54/2423	292/18670	0.00434277	0.0273794	0.0200769	C1QTNF3/GCK/DCXR/UGT1A3/GNMT/PPP1R3G/PDK4/UGT1A4/GPLD1/OTOG/G6PC/PCK2/UGT2B7/GCGR/SORD/PFKFB1/LEPR/ALDOB/ADIPOQ/IGF1/RGN/PPARGC1A/PGM5/BRS3/C1QTNF2/AKR1B1/PDX1/C1QTNF1/APOD/PGM2L1/UGT1A8/FABP5/HK3/CHST1/FUT8/UGT1A5/SLC2A1/TKTL1/GNB3/G6PD/RUBCNL/TNF/OTOGL/FUT9/FUT7/FUT4/TFAP2B/PFKFB3/LEP/PKM/PFKP/PMAIP1/ENO2/UGT1A10	54	1.08866
BP	GO:0090288	negative regulation of cellular response to growth factor stimulus	34/2423	166/18670	0.00434903	0.0273896	0.0200844	CIDEA/GREM2/HJV/NIBAN2/ADGRA2/DCN/NBL1/TGFB3/GREM1/GATA3/TGFB1/SFRP1/EMILIN1/HTRA4/ADAMTS12/CHST11/SOST/DKK1/SLIT2/FZD1/SHISA2/RASL11B/CHRDL1/WNT1/HTRA3/SEMA6A/SFRP2/NOG/SULF1/CER1/FBN2/PMEPA1/CREB3L1/VEPH1	34	4.80196
BP	GO:0014013	regulation of gliogenesis	27/2423	124/18670	0.00440675	0.0277237	0.0203294	TERT/TREM2/LTA/TNFRSF21/TGFB1/MYB/GPR183/IL6/NTRK3/OLIG2/PITX3/ID4/PTPRZ1/P2RY12/SERPINE2/STAP1/NKX6-1/TNF/IL1B/ZNF488/NOG/SOX11/TENM4/ZNF365/LIF/LIN28A/SPINT1	27	4.81125
BP	GO:0007566	embryo implantation	14/2423	51/18670	0.00442475	0.0277498	0.0203486	STC2/FBLN1/PTGS2/APELA/SPP1/ACOD1/IL1B/PTGIS/MMP2/SCGB1A1/MMP9/DDR1/LIF/HMX3	14	3.74166
BP	GO:0045668	negative regulation of osteoblast differentiation	14/2423	51/18670	0.00442475	0.0277498	0.0203486	RANBP3L/GREM1/HOXA2/GDF10/AREG/SFRP1/SEMA4D/IGFBP5/TWIST1/TNF/RORB/NOG/FGF23/HAND2	14	3.20713
BP	GO:2000300	regulation of synaptic vesicle exocytosis	19/2423	78/18670	0.00442497	0.0277498	0.0203486	DRD1/CAMK2A/SYT9/ADRA1A/CHRNA4/P2RX1/APBA2/PRKCB/RIMS4/PFN2/ADORA2B/CHRNA5/P2RY4/CHRNA6/PRKCG/STXBP5L/SYT4/DRD2/NLGN1	19	2.06474
BP	GO:0048747	muscle fiber development	17/2423	67/18670	0.00443114	0.0277591	0.0203554	P2RX2/NIBAN2/NEB/MYL2/MYH6/KEL/NEBL/MYOF/RYR1/HDAC9/WNT10B/MYBPC2/SHOX2/MYOD1/COMP/DNER/UCHL1	17	3.63803
BP	GO:0014065	phosphatidylinositol 3-kinase signaling	31/2423	148/18670	0.00444983	0.0278173	0.020398	HTR2B/IGF1/LTK/DCN/FGR/PIK3CG/GATA3/PIK3CD/IER3/RASGRP1/NTRK3/SEMA4D/IL18/OSM/TWIST1/SERPINE2/PDGFRA/IGF1R/FBXL2/NCF1/TNF/TGFB2/CEP55/HGF/FGFR1/NYAP2/TYRO3/ERBB4/LEP/PTPN13/NTRK2	31	4.84934
BP	GO:0035148	tube formation	31/2423	148/18670	0.00444983	0.0278173	0.020398	MTHFD1/GDNF/PTK7/HNF1B/TEAD2/GATA3/TGFB1/SALL4/SFRP1/HOXA1/IRX2/TWIST1/PRICKLE1/BMP5/TGFB2/FGF10/FZD1/SOX4/CTHRC1/SFRP2/NOG/FZD2/FOLR1/SOX11/VANGL2/SPINT2/OVOL2/ALX1/BMP7/SPINT1/GRHL2	31	4.84934
BP	GO:0022604	regulation of cell morphogenesis	83/2423	484/18670	0.00452599	0.0282636	0.0207253	UST/MT3/CUX2/TNR/CARMIL1/TBR1/PLXNA3/FGR/CCL11/FMNL2/EPHA7/HCK/LIMK1/ISLR2/NEUROG3/CORO1A/SEMA6D/NLGN3/PTPRO/POU3F2/FBLIM1/TLX2/ITGB2/FMNL1/ZNF135/RHOF/SEMA3D/ERMN/BDNF/TRIM46/CHODL/WTIP/SYT3/RHOH/KEL/LRRC4C/NTRK3/FGD3/SEMA4D/FLNA/GRIN1/FBLN1/SEMA4A/MYO10/BCL11A/NKX6-1/SPP1/MELTF/S100B/SLIT2/DBN1/SPTA1/UNC13D/HAS2/OLFM1/CRABP2/SYT4/ADGRB3/CCL7/SEMA6A/RASAL1/PDPN/L1CAM/PLXNB3/TACSTD2/SHOX2/UNC13A/…	83	8.23232
BP	GO:0014075	response to amine	13/2423	46/18670	0.00457459	0.028477	0.0208818	DRD1/DRD5/CPS1/CNR2/RGS17/OXTR/GRIN1/HDAC9/GRIN2A/RGS2/RGS4/DRD2/PPP1R1B	13	1.94145
BP	GO:0022602	ovulation cycle process	13/2423	46/18670	0.00457459	0.028477	0.0208818	ESR1/SLIT3/TGFB3/PTX3/RETN/PDGFRA/PTPRN/TGFB2/SLIT2/LEP/NPY5R/BMPR1B/EREG	13	3.05085
BP	GO:0099172	presynapse organization	13/2423	46/18670	0.00457459	0.028477	0.0208818	NLGN3/SLITRK2/NTRK3/SNCA/NTNG2/GPC4/LRFN4/DKK1/FZD1/CBLN2/NRXN1/SLITRK1/NLGN1	13	3.60555
BP	GO:0010573	vascular endothelial growth factor production	11/2423	36/18670	0.00461455	0.0286354	0.0209979	ADAMTS3/ADGRG1/TGFB1/IL6/HPSE/ADORA2B/IL1A/PTGS2/IL1B/SULF1/ISL1	11	3.31662
BP	GO:0071634	regulation of transforming growth factor beta production	11/2423	36/18670	0.00461455	0.0286354	0.0209979	IL13/LGALS9/MYB/CD24/PTGS2/TGFB2/LUM/CDH3/ITGB6/ITGB8/SERPINB7	11	2.7136
BP	GO:0090322	regulation of superoxide metabolic process	11/2423	36/18670	0.00461455	0.0286354	0.0209979	RGN/ITGB2/TGFB1/CLEC7A/ITGAM/FPR2/SYK/TNF/GSTP1/CD177/BMP7	11	2.7136
BP	GO:0050873	brown fat cell differentiation	12/2423	41/18670	0.00464932	0.0288209	0.021134	FNDC5/FABP4/ADIG/ADIPOQ/ALDH6A1/PPARGC1A/SLC2A4/UCP1/PTGS2/PLAC8/RGS2/LEP	12	-0.57735
BP	GO:0008064	regulation of actin polymerization or depolymerization	36/2423	179/18670	0.00465949	0.0288236	0.0211359	ACTN2/CTNNA2/LMOD2/RHOBTB1/COTL1/SH3BP1/CARMIL1/SPIRE1/CCL11/NCKAP1L/BAIAP2L2/HCK/PLEK/CORO1A/ADD2/SPTB/NCK2/CAPG/KIRREL1/MAGEL2/PFN2/CARMIL2/CCR7/ARHGAP28/FMN1/CCL26/SLIT2/DBN1/SCIN/SPTA1/TMSB15B/CRACD/PLEKHH2/FHOD3/FMN2/ARHGAP40	36	4.66667
BP	GO:0008361	regulation of cell size	36/2423	179/18670	0.00465949	0.0288236	0.0211359	SLC12A1/MT3/TNR/VAV1/PLXNA3/CAV3/EPHA7/LIMK1/ISLR2/PLEK/SEMA6D/RAP1GAP2/AQP1/SEMA3D/BDNF/TRIM46/KEL/NTRK3/SEMA4D/IL7R/KCNN4/SEMA4A/GNB3/NKX6-1/SPP1/DBN1/OLFM1/CRABP2/SEMA6A/L1CAM/SCTR/SEMA3A/SEMA3E/LPAR3/SEMA3C/EFNA5	36	5
BP	GO:0097756	negative regulation of blood vessel diameter	20/2423	84/18670	0.00469219	0.0288245	0.0211366	ACE2/DRD5/ADRA1A/HTR2B/HTR7/ASIC2/KCNMB4/P2RX1/AVPR1B/KEL/ADORA1/PTAFR/OXTR/PTGS2/CD38/HRH2/LEP/ADRA2A/COMP/CHGA	20	2.68328
BP	GO:1902803	regulation of synaptic vesicle transport	20/2423	84/18670	0.00469219	0.0288245	0.0211366	DRD1/CAMK2A/SYT9/ADRA1A/CHRNA4/SLC2A4/P2RX1/APBA2/PRKCB/RIMS4/PFN2/ADORA2B/CHRNA5/P2RY4/CHRNA6/PRKCG/STXBP5L/SYT4/DRD2/NLGN1	20	1.78885
BP	GO:0021516	dorsal spinal cord development	8/2423	22/18670	0.00469859	0.0288245	0.0211366	ASCL1/LHX3/GDNF/LHX5/HOXB8/WNT1/LHX1/LBX1	8	0.707107
BP	GO:0031342	negative regulation of cell killing	8/2423	22/18670	0.00469859	0.0288245	0.0211366	IL13/LGALS9/LILRB1/PTPRC/IL7R/HAVCR2/KIR2DL4/SERPINB4	8	2.12132
BP	GO:0032928	regulation of superoxide anion generation	8/2423	22/18670	0.00469859	0.0288245	0.0211366	ITGB2/TGFB1/CLEC7A/ITGAM/FPR2/SYK/GSTP1/CD177	8	2.82843
BP	GO:0042359	vitamin D metabolic process	8/2423	22/18670	0.00469859	0.0288245	0.0211366	CYP3A4/CYP1A1/IFNG/TNF/IL1B/FGFR1/FGF23/CYP24A1	8	1.41421
BP	GO:0060065	uterus development	8/2423	22/18670	0.00469859	0.0288245	0.0211366	ESR1/GATA3/HOXA11/FOXL2/TGFB2/CYP19A1/LHX1/STRA6	8	2.12132
BP	GO:0090189	regulation of branching involved in ureteric bud morphogenesis	8/2423	22/18670	0.00469859	0.0288245	0.0211366	GDNF/HNF1B/HOXB7/TGFB1/NOG/TACSTD2/LHX1/SIX2	8	2.12132
BP	GO:0003018	vascular process in circulatory system	35/2423	173/18670	0.00473112	0.0289641	0.0212389	DRD1/ACE2/DRD5/ADRA1A/HTR2B/CPS1/HTR7/ASIC2/KCNMB4/P2RX1/C2CD4A/TGFB1/AVPR1B/GUCY1A1/FOXC2/KEL/ADORA1/PTAFR/OXTR/ADORA2B/UTS2/PTGS2/CD38/NPPB/ABR/SLIT2/HRH2/RGS2/UTS2B/MTNR1B/LEP/ADRA2A/COMP/CHGA/NTS	35	3.88771
BP	GO:0055002	striated muscle cell development	35/2423	173/18670	0.00473112	0.0289641	0.0212389	ACTN2/MYH3/TBX3/P2RX2/ADRA1A/IGF1/LMOD2/PGM5/PI16/NIBAN2/NEB/MYL2/CAV3/MYH6/KEL/NEBL/ANKRD1/PDGFRA/MYOF/RYR1/G6PD/HDAC9/WNT10B/RGS2/RGS4/MYBPC2/SHOX2/FHOD3/MYOD1/COMP/NKX2-5/TNNT1/DNER/KRT19/UCHL1	35	3.21159
BP	GO:0032623	interleukin-2 production	16/2423	62/18670	0.00475074	0.0290541	0.021305	CD86/PRKCQ/SASH3/GATA3/CD3E/CLEC7A/HOMER3/PTPRC/IL18/HAVCR2/IL1A/IL1B/CD80/CARD11/IRF4/VTCN1	16	4
BP	GO:0007626	locomotory behavior	39/2423	198/18670	0.0048241	0.0294723	0.0216116	DRD1/ADCY8/OTOG/CHRNA4/TNR/GDNF/SNCG/ADAM22/GRM6/GRM5/APBA2/GRM1/ADCY5/NEGR1/PITX3/PENK/CALB1/GRIN1/HOXB8/SLC6A3/SNCA/SLITRK6/CACNA1B/KCNJ10/PAK6/GAD1/EN1/NTF4/SNAP25/DRD2/SEZ6L/MCOLN3/HTR2C/DMBX1/KCND2/CRHR1/PPP1R1B/PAK5/UCHL1	39	4.32346
BP	GO:1901379	regulation of potassium ion transmembrane transport	21/2423	90/18670	0.00491605	0.0300031	0.0220009	ACTN2/LRRC52/KCNE2/TREM2/LRRC26/CAV3/KCNS2/ANK2/KEL/FLNA/KCNE4/KCNIP1/KCNS1/KCNH2/LRRC38/ANK3/GAL/RGS4/MTNR1B/DPP10/WNK2	21	3.27327
BP	GO:0031424	keratinization	43/2423	224/18670	0.00519162	0.0316523	0.0232102	KRTAP10-6/DSG1/LCE2D/KRTAP5-1/KRT2/PKP1/DSG2/PI3/KRT14/KRTAP5-5/KRT23/KRT9/KRT36/SPRR1A/KRT78/KRT5/KRT15/KRT6B/SPRR3/CYP26B1/KLK13/EVPL/TGM5/KRT13/CDH3/SPRR1B/ABCA12/KRT7/KRT40/KRT28/KRT75/KRT17/KRTAP4-1/DSC3/KRT79/KRT16/KRT83/KRTAP1-1/KRT4/KRT20/KRT80/PKP3/KRT19	43	5.64245
BP	GO:0010812	negative regulation of cell-substrate adhesion	17/2423	68/18670	0.00520885	0.0316921	0.0232394	PLG/JAG1/APOD/PTPRO/NEXMIF/FBLN1/MELTF/MMP14/WNT1/AJAP1/FZD7/COL1A1/TACSTD2/POSTN/SEMA3E/EFNA5/MMP12	17	3.63803
BP	GO:0033627	cell adhesion mediated by integrin	17/2423	68/18670	0.00520885	0.0316921	0.0232394	NCKAP1L/PIK3CG/ITGA4/CD3E/ITGB2/NEXMIF/FOXC2/SYK/P2RY12/TESC/TGFB2/COL16A1/SFRP2/ITGB6/ITGB4/ITGB8/MUC1	17	4.12311
BP	GO:0001660	fever generation	5/2423	10/18670	0.00524387	0.0317096	0.0232522	IL1A/PTGS2/TNFRSF11A/TNF/IL1B	5	2.23607
BP	GO:0001787	natural killer cell proliferation	5/2423	10/18670	0.00524387	0.0317096	0.0232522	IL18/IL12B/PTPN22/ELF4/LEP	5	2.23607
BP	GO:0003149	membranous septum morphogenesis	5/2423	10/18670	0.00524387	0.0317096	0.0232522	TGFB2/FZD1/NOG/FZD2/VANGL2	5	2.23607
BP	GO:0060600	dichotomous subdivision of an epithelial terminal unit	5/2423	10/18670	0.00524387	0.0317096	0.0232522	AREG/FOXD1/SEMA3A/VANGL2/SEMA3C	5	2.23607
BP	GO:0072610	interleukin-12 secretion	5/2423	10/18670	0.00524387	0.0317096	0.0232522	LGALS9/LILRB1/CCL19/CCR7/TLR8	5	2.23607
BP	GO:2001225	regulation of chloride transport	5/2423	10/18670	0.00524387	0.0317096	0.0232522	GRM5/PTAFR/ANO9/PRKG2/CFTR	5	2.23607
BP	GO:0001911	negative regulation of leukocyte mediated cytotoxicity	7/2423	18/18670	0.00529774	0.0319375	0.0234193	LGALS9/LILRB1/PTPRC/IL7R/HAVCR2/KIR2DL4/SERPINB4	7	2.64575
BP	GO:0010832	negative regulation of myotube differentiation	7/2423	18/18670	0.00529774	0.0319375	0.0234193	ANKRD2/BDNF/TRIM72/BHLHE41/TMEM119/CEACAM5/NKX2-5	7	2.64575
BP	GO:0070633	transepithelial transport	7/2423	18/18670	0.00529774	0.0319375	0.0234193	RHBG/GPLD1/AQP1/BEST1/P2RY6/P2RY4/CFTR	7	1.13389
BP	GO:0030514	negative regulation of BMP signaling pathway	14/2423	52/18670	0.00534603	0.0320979	0.0235369	GREM2/HJV/NBL1/GREM1/SFRP1/SOST/DKK1/FZD1/CHRDL1/WNT1/HTRA3/SFRP2/NOG/CER1	14	2.67261
BP	GO:0032653	regulation of interleukin-10 production	14/2423	52/18670	0.00534603	0.0320979	0.0235369	TREM2/LGALS9/LILRB1/SASH3/TNFRSF21/CLEC7A/JAK3/MMP8/SYK/IL12B/TIGIT/INAVA/HGF/IRF4	14	3.74166
BP	GO:0048168	regulation of neuronal synaptic plasticity	14/2423	52/18670	0.00534603	0.0320979	0.0235369	RASGRF1/CAMK2A/JPH3/EGR2/GRM5/GRIN1/SNCA/S100B/KCNJ10/DBN1/SYT4/SHISA9/DRD2/UNC13A	14	2.67261
BP	GO:2000179	positive regulation of neural precursor cell proliferation	14/2423	52/18670	0.00534603	0.0320979	0.0235369	ASCL1/ADGRG1/CIP2A/SMARCD3/LHX5/PITX3/GLI3/FLNA/GLI1/RASSF10/GLI2/DRD2/INSM1/LHX1	14	3.20713
BP	GO:0008543	fibroblast growth factor receptor signaling pathway	25/2423	114/18670	0.00544241	0.0326435	0.023937	SPRED1/FGF19/SMOC2/GATA3/IQGAP1/SHCBP1/RUNX2/FGF20/FGF7/FGFBP1/FGF1/HHIP/ANOS1/FGF10/SHISA2/FGFR1/FLRT2/FGF4/NOG/SULF1/FGF23/GALNT3/CREB3L1/FGF5/ESRP1	25	5
BP	GO:0006953	acute-phase response	13/2423	47/18670	0.00558693	0.0332375	0.0243726	REG3A/SAA2/SAA1/HP/APCS/SAA4/IL6/IL1A/PTGS2/TNFRSF11A/TNF/IL1B/REG3G	13	0.27735
BP	GO:0060351	cartilage development involved in endochondral bone morphogenesis	13/2423	47/18670	0.00558693	0.0332375	0.0243726	COL7A1/POR/COL14A1/COL12A1/VWA2/COL6A2/HOXA11/COL6A3/COL1A1/CER1/SHOX2/COMP/MMP13	13	2.49615
BP	GO:0070231	T cell apoptotic process	13/2423	47/18670	0.00558693	0.0332375	0.0243726	RAG1/RIPK3/LGALS9/FASLG/ADAM8/PRKCQ/JAK3/IL7R/GLI3/CD27/IL2RA/PDCD1/LGALS14	13	3.05085
BP	GO:0099601	regulation of neurotransmitter receptor activity	18/2423	74/18670	0.00560111	0.0332375	0.0243726	ACTN2/RASGRF1/PPARGC1A/GRIA4/NLGN3/IFNG/GRIN1/GRIN2A/DLG3/LYPD6/SHISA9/GRIA2/NPTX2/ANXA3/NLGN1/NEFL/NPTX1/LYPD6B	18	2.82843
BP	GO:0022408	negative regulation of cell-cell adhesion	36/2423	181/18670	0.00560567	0.0332375	0.0243726	ADIPOQ/TNR/PLG/LGALS9/CD86/JAG1/CCL28/PDE5A/LILRB1/C1QTNF1/SPN/TNFRSF21/TGFB1/NEXMIF/IL2/IL10/JAK3/CTLA4/HAVCR2/GLI3/GPNMB/SERPINE2/TIGIT/PTPN22/MUC21/LAX1/IL2RA/CD80/WNT1/UBASH3B/SCGB1A1/EPCAM/PLA2G2D/SPINT2/FOXJ1/VTCN1	36	5
BP	GO:0035418	protein localization to synapse	16/2423	63/18670	0.00561697	0.0332375	0.0243726	STX3/ASIC2/ADAM22/KIF5C/GRIN1/GPC4/MAPK10/RAB27B/GRIN2A/MAP1A/KIF5A/SNAP25/PCLO/GRIP1/NRXN1/NLGN1	16	4
BP	GO:0007501	mesodermal cell fate specification	6/2423	14/18670	0.00562006	0.0332375	0.0243726	HOXA11/DKK1/FGFR1/SFRP2/EYA1/SIX2	6	2.44949
BP	GO:0021527	spinal cord association neuron differentiation	6/2423	14/18670	0.00562006	0.0332375	0.0243726	ASCL1/LHX3/LHX5/WNT1/LHX1/LBX1	6	0.816497
BP	GO:0042487	regulation of odontogenesis of dentin-containing tooth	6/2423	14/18670	0.00562006	0.0332375	0.0243726	RSPO2/ODAPH/TNFRSF11B/RUNX2/WNT10A/AMTN	6	1.63299
BP	GO:0070669	response to interleukin-2	6/2423	14/18670	0.00562006	0.0332375	0.0243726	IL2RB/IL2/JAK3/IL2RG/SYK/IL2RA	6	2.44949
BP	GO:0072498	embryonic skeletal joint development	6/2423	14/18670	0.00562006	0.0332375	0.0243726	HOXA11/HOXC11/NOG/SHOX2/WNT9A/BMP7	6	2.44949
BP	GO:0090178	regulation of establishment of planar polarity involved in neural tube closure	6/2423	14/18670	0.00562006	0.0332375	0.0243726	PTK7/SFRP1/FZD1/SFRP2/FZD2/VANGL2	6	2.44949
BP	GO:1901386	negative regulation of voltage-gated calcium channel activity	6/2423	14/18670	0.00562006	0.0332375	0.0243726	CBARP/CACNB3/GEM/RRAD/DRD2/CRHR1	6	2.44949
BP	GO:1904889	regulation of excitatory synapse assembly	6/2423	14/18670	0.00562006	0.0332375	0.0243726	NTRK3/SEMA4A/LRFN4/VSTM5/GRID2/NRXN1	6	2.44949
BP	GO:0060606	tube closure	21/2423	91/18670	0.00562699	0.0332453	0.0243783	MTHFD1/PTK7/TEAD2/TGFB1/SALL4/SFRP1/TWIST1/PRICKLE1/TGFB2/FGF10/FZD1/CTHRC1/SFRP2/NOG/FZD2/FOLR1/VANGL2/SPINT2/ALX1/SPINT1/GRHL2	21	4.14614
BP	GO:0042744	hydrogen peroxide catabolic process	10/2423	32/18670	0.0057015	0.0336184	0.0246519	MT3/HP/HBD/HBM/HBQ1/DUOX1/SNCA/APOA4/HBE1/DUOX2	10	0.632456
BP	GO:0071295	cellular response to vitamin	10/2423	32/18670	0.0057015	0.0336184	0.0246519	SFRP1/PENK/PHEX/TNC/COL1A1/LEP/FOLR1/FGF23/POSTN/CYP24A1	10	3.16228
BP	GO:0015701	bicarbonate transport	12/2423	42/18670	0.0057548	0.0338652	0.0248329	CA4/CA14/SLC4A1/CA5A/SLC4A8/AQP1/CA12/SLC4A11/SLC26A9/SLC4A3/CFTR/CA9	12	1.1547
BP	GO:0030517	negative regulation of axon extension	12/2423	42/18670	0.0057548	0.0338652	0.0248329	MT3/TNR/PLXNA3/SEMA6D/SEMA3D/TRIM46/SEMA4D/SEMA4A/SEMA6A/SEMA3A/SEMA3E/SEMA3C	12	2.3094
BP	GO:0048709	oligodendrocyte differentiation	22/2423	97/18670	0.00580573	0.0339572	0.0249003	ASCL1/TSPAN2/NLGN3/TNFRSF21/PLP1/TGFB1/OLIG2/ID4/CNTNAP1/PTPRZ1/GLI3/PRDM8/NKX6-1/GSTP1/KCNJ10/ZNF488/SOX11/TENM4/ZNF365/LPAR1/NTRK2/FA2H	22	4.26401
BP	GO:0050728	negative regulation of inflammatory response	34/2423	169/18670	0.00580655	0.0339572	0.0249003	C1QTNF3/SAA1/NLRP6/ADIPOQ/IGF1/APCS/CNR2/FFAR4/APOD/GATA3/IL2/SMPDL3B/IL10/FPR2/ADORA1/PTPRC/PTGER4/SLAMF8/TAFA3/IL12B/NLRP7/IL2RA/CYP19A1/ACOD1/GSTP1/ABR/SIGLEC10/HGF/PTGIS/TYRO3/NPY5R/ISL1/IL22RA2/TNFAIP6	34	3.77297
BP	GO:0060538	skeletal muscle organ development	34/2423	169/18670	0.00580655	0.0339572	0.0249003	P2RX2/HLF/ANKRD2/NIBAN2/DCN/KLF5/EGR2/TBX1/TGFB1/KEL/POPDC3/ANKRD1/ASB2/TWIST1/RYR1/PITX1/ANKRD33/FOXL2/S100B/DKK1/HDAC9/BASP1/CYP26B1/CHRNA1/MYH15/WNT10B/MSC/SOX11/SHOX2/VAX1/CHRND/MYOD1/STRA6/DNER	34	5.14496
BP	GO:0033280	response to vitamin D	11/2423	37/18670	0.00581058	0.0339572	0.0249003	STC2/TGFB1/SFRP1/PENK/PTGS2/PHEX/SPP1/TNC/FGF23/BMP7/CYP24A1	11	3.31662
BP	GO:0045730	respiratory burst	11/2423	37/18670	0.00581058	0.0339572	0.0249003	PIK3CG/HCK/PIK3CD/CLEC7A/RAC2/NCF2/CD24/SLAMF8/CYBB/NCF1/JCHAIN	11	3.31662
BP	GO:0046006	regulation of activated T cell proliferation	11/2423	37/18670	0.00581058	0.0339572	0.0249003	IGF1/RIPK3/LGALS9/IL12RB1/TNFSF9/IL2/CD24/IL18/IL12B/IL2RA/HHLA2	11	2.7136
BP	GO:0086010	membrane depolarization during action potential	11/2423	37/18670	0.00581058	0.0339572	0.0249003	CACNA1I/CAV3/CACNA2D1/ANK2/SCN2B/SCN7A/KCNH2/SCN3B/CACNA1G/ANK3/HCN4	11	2.7136
BP	GO:0070509	calcium ion import	19/2423	80/18670	0.00593076	0.0346253	0.0253903	CACNA1I/GCK/STRIT1/TRPM2/CAV3/GRM6/CACNA2D1/FAM155A/FCRL3/MCUB/CACNA1B/FAM155B/MS4A1/SLN/CACNA1G/TRPV5/CALCR/TRPV6/ATP2C2	19	2.9824
BP	GO:0032652	regulation of interleukin-1 production	23/2423	103/18670	0.00594435	0.0346364	0.0253984	SAA1/IGF1/CARD17/TREM2/LGALS9/PANX3/PYHIN1/PYDC1/CLEC7A/CCL19/IL10/HAVCR2/IFNG/CCR7/NLRP7/MNDA/INAVA/TLR8/GSTP1/SPHK1/AIM2/ISL1/NLRP2	23	3.96177
BP	GO:0034766	negative regulation of ion transmembrane transport	23/2423	103/18670	0.00594435	0.0346364	0.0253984	ACTN2/KCNE2/CAV3/CBARP/TGFB1/CACNB3/KEL/GEM/KCNE4/TWIST1/RRAD/KCNH2/SLN/ANK3/RGS2/RGS4/MTNR1B/MMP9/DRD2/ADRA2A/TRDN/ANO9/CRHR1	23	3.96177
BP	GO:1905952	regulation of lipid localization	32/2423	157/18670	0.00597627	0.0347881	0.0255096	REN/CIDEA/APOC4/ABCB4/APOC3/APOA5/ADIPOQ/APOC1/CYP4A11/FITM1/PON1/C1QTNF1/IKBKE/MYB/HILPDA/IL6/SYK/RETN/TNFRSF11A/PLTP/APOA4/SPP1/TNF/CYP19A1/IL1B/PLA2R1/GAL/LEP/ABCA12/ATP8A2/TAC1/CRHR1	32	1.76777
BP	GO:0031345	negative regulation of cell projection organization	37/2423	188/18670	0.00600888	0.0349436	0.0256236	MT3/TNR/PMP22/PLXNA3/MINAR1/EPHA7/SEMA6D/NLGN3/PTPRO/RAP1GAP2/ODF2L/TLX2/CRMP1/SEMA3D/TRIM46/PFN2/DPYSL3/SEMA4D/INPP5J/CD38/SEMA4A/BCL11A/STAP1/SPP1/DKK1/SLIT2/SEMA6A/PLXNB3/TACSTD2/ZNF365/LPAR1/SEMA3A/STMN2/ITGA3/NLGN1/SEMA3E/SEMA3C	37	5.42517
BP	GO:0007178	transmembrane receptor protein serine/threonine kinase signaling pathway	62/2423	349/18670	0.00601618	0.0349517	0.0256296	CIDEA/TMEM100/GREM2/HJV/NBL1/TGFB3/GREM1/CAV3/CRB2/LEFTY2/MYH6/GDF10/TGFB1/TBX20/RUNX2/LTBP2/FUT8/SFRP1/EMILIN1/DUSP15/HTRA4/DLX5/ROR2/CHST11/SOST/CILP/BMP5/DKK1/TGFB2/FGF10/FZD1/RASL11B/INHA/SFRP4/CHRDL1/FMOD/WNT1/COL1A2/TFAP2B/COL3A1/HTRA3/LEFTY1/FOXD1/SFRP2/NOG/FOLR1/SULF1/SOX11/DMRT1/BMP3/MSX2/CER1/FBN2/PMEPA1/BMPR1B/COMP/ITGA3/OVOL2/NKX2-5/BMP7/VEPH1/SFRP5	62	6.85801
BP	GO:0030073	insulin secretion	40/2423	207/18670	0.00610033	0.0353491	0.025921	GCK/ADCY8/GLUL/SYT9/GPLD1/KCNB1/PDX1/HNF1B/MC4R/ADCY5/SFRP1/FAM3D/IFNG/CD38/GPR119/SLC2A1/PTPRN/NKX6-1/UCN3/TNF/IL1B/SOX4/GAL/STXBP5L/TFAP2B/MTNR1B/LEP/SNAP25/GPR27/DRD2/ISL1/PCLO/ADRA2A/ITPR3/GIPR/EPHA5/CHGA/SLC30A8/CFTR/EFNA5	40	4.42719
BP	GO:0007605	sensory perception of sound	30/2423	145/18670	0.00610249	0.0353491	0.025921	P2RX2/CLRN1/OTOG/USH2A/ASIC2/PDZD7/ROR1/TBX1/COL11A2/OTOF/SLC17A8/SLC52A3/HOXA1/ATP6V1B1/POU3F4/SLITRK6/CEMIP/PAX3/OTOGL/USH1G/DCDC2/CHRNA9/TFAP2A/FGFR1/COL1A1/EPYC/EYA1/COL11A1/GABRA5/MYO3A	30	4.01663
BP	GO:0007612	learning	30/2423	145/18670	0.00610249	0.0353491	0.025921	DRD1/DRD5/TNR/RAG1/FOXB1/JPH3/TBR1/GRM5/NLGN3/GRIN1/PTGS2/DKK1/SLC24A2/GRIN2A/PAK6/EN1/HRH2/MAP1A/ADGRB3/SNAP25/DRD2/NTRK2/NRXN1/NPTX2/TAC1/CRHR1/STRA6/PPP1R1B/GABRA5/PAK5	30	4.01663
BP	GO:0032612	interleukin-1 production	25/2423	115/18670	0.00611727	0.0354	0.0259583	SAA1/IGF1/CARD17/TREM2/LGALS9/PANX3/PYHIN1/PYDC1/CLEC7A/CCL19/IL10/HAVCR2/IFNG/CCR7/NLRP7/MNDA/INAVA/TLR8/GSTP1/IL1B/SPHK1/GBP5/AIM2/ISL1/NLRP2	25	4.2
BP	GO:0001942	hair follicle development	20/2423	86/18670	0.0062022	0.0358215	0.0262674	LGR5/DKK4/FGF7/HPSE/IGFBP5/SOX21/DKK1/TNF/TGFB2/FGF10/WNT10A/WNT10B/GAL/HOXC13/CDH3/KRT17/MSX2/FOXN1/VANGL2/FOXE1	20	3.57771
BP	GO:0070542	response to fatty acid	20/2423	86/18670	0.0062022	0.0358215	0.0262674	PDK4/ADIPOQ/PPARGC1A/CPS1/PON1/PDX1/FFAR2/AANAT/PTGFR/CCL19/UCP1/SFRP1/PTGER4/P2RY6/CCR7/PTAFR/PTGS2/P2RY4/TNC/GIPR	20	2.23607
BP	GO:0030539	male genitalia development	8/2423	23/18670	0.00639683	0.036802	0.0269864	TBX3/SRD5A2/AR/ROR2/PDGFRA/BMP5/FGF10/SYCP2	8	0.707107
BP	GO:0051043	regulation of membrane protein ectodomain proteolysis	8/2423	23/18670	0.00639683	0.036802	0.0269864	GPLD1/ADAM8/IL10/IFNG/TNF/TIMP2/IL1B/ADRA2A	8	2.12132
BP	GO:0071294	cellular response to zinc ion	8/2423	23/18670	0.00639683	0.036802	0.0269864	MT1B/MT1X/MT1M/MT2A/MT1G/MT3/MT1E/MT1H	8	-2.82843
BP	GO:0086012	membrane depolarization during cardiac muscle cell action potential	8/2423	23/18670	0.00639683	0.036802	0.0269864	CAV3/CACNA2D1/ANK2/SCN2B/SCN3B/CACNA1G/ANK3/HCN4	8	2.82843
BP	GO:0045744	negative regulation of G protein-coupled receptor signaling pathway	14/2423	53/18670	0.00641547	0.0368302	0.027007	HTR2B/BICD1/PLEK/SNCA/DNM1/APELA/BECN2/CXCL8/APLP1/RGS2/RGS4/RGS13/DRD2/GIPR	14	3.20713
BP	GO:0070228	regulation of lymphocyte apoptotic process	14/2423	53/18670	0.00641547	0.0368302	0.027007	RAG1/RIPK3/LGALS9/ADAM8/PRKCQ/IL2/IL10/JAK3/IL7R/CD3G/CD27/PDCD1/BIRC7/LGALS14	14	3.20713
BP	GO:1904894	positive regulation of STAT cascade	21/2423	92/18670	0.00642039	0.0368302	0.027007	IL13/IGF1/HPX/AKR1B1/IL12A/IL2/TNFRSF18/IL10/IL6/IL18/IL7R/IFNG/IL12B/OSM/TNF/ERBB4/LEP/CRLF2/ISL1/LIF/PRL	21	3.27327
BP	GO:0050848	regulation of calcium-mediated signaling	22/2423	98/18670	0.00659041	0.0377689	0.0276954	P2RX2/TMEM100/P2RX3/IGF1/RGN/TREM2/JPH1/ZAP70/JPH3/HAP1/PLEK/CD3E/HOMER3/P2RX5/P2RY6/TRAT1/SYK/TNF/CD22/C10orf71/JSRP1/TRDN	22	2.55841
BP	GO:0000187	activation of MAPK activity	31/2423	152/18670	0.00667381	0.0381729	0.0279917	PROK1/SAA1/IGF1/MAP4K1/EPGN/C1QTNF2/TGFB3/CCL19/GRM1/FPR1/PTPRC/PROK2/NTRK3/FGF1/ADORA2B/SYK/MAPK10/INAVA/TNF/FGF10/IL1B/MUC20/HGF/GRM4/TGFA/LPAR1/ERN2/BIRC7/CHRNA7/LPAR3/WNT7B	31	4.49013
BP	GO:0001890	placenta development	31/2423	152/18670	0.00667381	0.0381729	0.0279917	LHX3/MME/ETNK2/ANG/DCN/STC2/IL10/LDOC1/PTGS2/PLAC1/APELA/NRK/SPP1/BMP5/PLCD3/MDFI/PTGIS/GJB3/LEP/WNT2/LIF/SPINT2/CDX2/ITGB8/NDP/OVOL2/BMP7/SPINT1/GRHL2/KRT19/WNT7B	31	4.13092
BP	GO:0007218	neuropeptide signaling pathway	23/2423	104/18670	0.00671723	0.0383842	0.0281466	GRPR/GALR3/SSTR1/PRLHR/PROK2/PENK/PMCH/NPPB/SORCS1/PCSK1N/GAL/RXFP4/TYRO3/GPR1/NPY5R/PNOC/NPFFR1/KISS1R/NXPH4/SSTR3/GPR84/TAC1/CRHR1	23	3.54475
BP	GO:0045834	positive regulation of lipid metabolic process	30/2423	146/18670	0.00675057	0.0385375	0.028259	GPLD1/HSD17B13/CYP7A1/APOA5/HTR2B/ADIPOQ/RGN/APOC1/PPARGC1A/POR/CGA/C1QTNF2/FGR/TGFB1/CCL19/FPR2/ADORA1/IFNG/CCR7/FGF1/P2RY12/PTGS2/TWIST1/PDGFRA/APOA4/TNF/RAB38/IL1B/CD19/HTR2C	30	1.46059
BP	GO:0002711	positive regulation of T cell mediated immunity	13/2423	48/18670	0.00677042	0.0385764	0.0282875	IL12RB1/IL12A/CD1C/SASH3/GATA3/IL6/PTPRC/IL18/IL12B/CD1E/IL1B/CD1B/CD1A	13	3.60555
BP	GO:0043268	positive regulation of potassium ion transport	13/2423	48/18670	0.00677042	0.0385764	0.0282875	ACTN2/LRRC52/DRD1/TREM2/LRRC26/ANK2/ADORA1/FLNA/KCNH2/LRRC38/GAL/ADRA2A/WNK2	13	1.94145
BP	GO:1902932	positive regulation of alcohol biosynthetic process	9/2423	28/18670	0.00700287	0.039786	0.0291745	CYP7A1/POR/P2RY6/IFNG/PTAFR/FGF1/SNCA/TNF/IL1B	9	1.66667
BP	GO:1903792	negative regulation of anion transport	9/2423	28/18670	0.00700287	0.039786	0.0291745	ADORA1/PLA2R1/SFRP4/RGS2/RGS4/LEP/NPY5R/ANO9/PRKG2	9	3
BP	GO:2000463	positive regulation of excitatory postsynaptic potential	9/2423	28/18670	0.00700287	0.039786	0.0291745	CUX2/NLGN3/CACNB3/GRIN1/RGS4/NRXN1/CHRNA7/NLGN1/IGSF11	9	2.33333
BP	GO:0031667	response to nutrient levels	84/2423	499/18670	0.00703678	0.0399403	0.0292877	CYP1A1/ALDH3A1/ASCL1/GLUL/P2RX2/SERPINC1/MT3/PDK4/G6PC/PCK2/KCNB1/LRCOL1/GCGR/SORD/PFKFB1/ADIPOQ/P2RX3/SSTR1/PPARGC1A/CPS1/POR/PON1/LTA/PDX1/CCL28/P2RX1/TNFRSF11B/STC2/CD3E/TGFB1/CACNB3/P2RX5/ASNS/UCP1/MC4R/TRPC3/SFRP1/CLPSL2/NUPR2/CYBB/HPCA/PENK/GRIN1/P2RY12/PTGS2/SLC2A1/P2RY4/PHEX/BCL11A/SPP1/G6PD/BECN2/UCN3/GSTP1/IL1B/CYP26B1/PRKCG/TNC/PCSK1N/SLC6A19/COL1A1/LEP/SFRP2/MYH13/FOLR1/FGF23/SCTR/CLP…	84	4.36436
BP	GO:0006775	fat-soluble vitamin metabolic process	12/2423	43/18670	0.00705868	0.0400262	0.0293507	CYP3A4/CYP1A1/RBP2/CRABP1/IFNG/PLTP/TNF/IL1B/CYP26B1/FGFR1/FGF23/CYP24A1	12	2.3094
BP	GO:0051781	positive regulation of cell division	20/2423	87/18670	0.00709428	0.0401337	0.0294295	PROK1/VEGFD/HTR2B/TGFB3/ECT2/TGFB1/KIF23/FGF7/FGF1/IL1A/OSM/TGFB2/IL1B/CXCR5/FGF4/DRD2/TGFA/FGF5/MACC1/EREG	20	3.1305
BP	GO:0001756	somitogenesis	17/2423	70/18670	0.00709798	0.0401337	0.0294295	NKD1/RIPPLY1/FOXB1/CRB2/FOXC2/SFRP1/MEOX1/ROR2/DKK1/HES7/RIPPLY2/DMRT2/SFRP2/DLL3/LHX1/CDX2/SEMA3C	17	3.15296
BP	GO:0050766	positive regulation of phagocytosis	17/2423	70/18670	0.00709798	0.0401337	0.0294295	TREM2/RAB31/NCKAP1L/IL2RB/SIRPB1/CLEC7A/PTX3/DOCK2/IL2RG/FPR2/SIRPG/PTPRC/IFNG/STAP1/TNF/ABR/IL1B	17	4.12311
BP	GO:0050954	sensory perception of mechanical stimulus	33/2423	165/18670	0.00712103	0.0402257	0.0294969	P2RX2/CLRN1/OTOG/USH2A/ASIC2/PDZD7/ROR1/TBX1/COL11A2/OTOF/CACNB3/SLC17A8/SLC52A3/HOXA1/ATP6V1B1/SERPINE2/POU3F4/SLITRK6/CEMIP/PAX3/OTOGL/USH1G/DCDC2/CHRNA9/TFAP2A/FGFR1/COL1A1/EPYC/EYA1/COL11A1/TRPA1/GABRA5/MYO3A	33	4.35194
BP	GO:0021885	forebrain cell migration	15/2423	59/18670	0.00712971	0.0402363	0.0295047	DRD1/TNR/FOXB1/LAMB1/POU3F2/ADGRG1/GLI3/P2RY12/ARX/SLIT2/TYRO3/DRD2/SEMA3A/NRG3/CDK5R2	15	2.84019
BP	GO:0042692	muscle cell differentiation	67/2423	385/18670	0.00716678	0.040407	0.0296299	ACTN2/CTNNA2/MYH3/CTH/TBX3/P2RX2/ADRA1A/IGF1/LMOD2/PGM5/PI16/ANKRD2/NIBAN2/NEB/KLF5/TBX5/MYL2/GREM1/CAV3/TBX1/MYH6/TGFB1/SMARCD3/CD53/MYEF2/BDNF/CXCL9/ANK2/KEL/IGFBP5/POPDC3/NEBL/ANKRD1/PDGFRA/MYOF/RYR1/TRIM72/ADGRB1/G6PD/DKK1/HDAC9/FGF10/CYP26B1/MMP14/WNT1/WNT10B/RGS2/FZD7/ADAM12/RGS4/ADGRB3/BHLHE41/TMEM119/MYBPC2/SHOX2/FHOD3/MYOD1/COMP/CEACAM5/NKX2-5/TNNT1/DNER/SPEG/BARX2/EREG/KRT19/UCHL1	67	5.74196
BP	GO:0008154	actin polymerization or depolymerization	40/2423	209/18670	0.00719757	0.040509	0.0297047	ACTN2/CTNNA2/ANG/LMOD2/RHOBTB1/COTL1/SH3BP1/CARMIL1/SPIRE1/CCL11/NCKAP1L/WIPF1/BAIAP2L2/HCK/PLEK/CORO1A/ADD2/SPTB/NCK2/CAPG/KIRREL1/MAGEL2/PFN2/CARMIL2/MICAL1/CCR7/ARHGAP28/FMN1/GAS7/CCL26/SLIT2/DBN1/SCIN/SPTA1/TMSB15B/CRACD/PLEKHH2/FHOD3/FMN2/ARHGAP40	40	4.74342
BP	GO:0002707	negative regulation of lymphocyte mediated immunity	11/2423	38/18670	0.00723742	0.040509	0.0297047	C4BPA/C4BPB/LGALS9/LILRB1/CR1/PTPRC/IL7R/HAVCR2/KIR2DL4/SERPINB4/FOXJ1	11	2.11058
BP	GO:0015804	neutral amino acid transport	11/2423	38/18670	0.00723742	0.040509	0.0297047	SLC7A8/SLC38A1/SLC38A5/SLC6A5/SLC1A5/RGS2/SLC6A19/RGS4/SLC6A17/LEP/SLC6A15	11	3.31662
BP	GO:0071604	transforming growth factor beta production	11/2423	38/18670	0.00723742	0.040509	0.0297047	IL13/LGALS9/MYB/CD24/PTGS2/TGFB2/LUM/CDH3/ITGB6/ITGB8/SERPINB7	11	2.7136
BP	GO:0086091	regulation of heart rate by cardiac conduction	11/2423	38/18670	0.00723742	0.040509	0.0297047	CTNNA3/KCNE2/DSG2/CACNA2D1/ANK2/SCN2B/KCNE4/KCNH2/SCN3B/CACNA1G/HCN4	11	2.11058
BP	GO:0010837	regulation of keratinocyte proliferation	10/2423	33/18670	0.00724646	0.040509	0.0297047	REG3A/AREG/FGF7/EPPK1/BCL11B/FGF10/REG3G/HAS2/CDH3/OVOL2	10	2.52982
BP	GO:0014072	response to isoquinoline alkaloid	10/2423	33/18670	0.00724646	0.040509	0.0297047	ADCY8/PITX3/PENK/GRIN1/PRKCG/RGS4/DRD2/TACR3/TAC1/PPP1R1B	10	2.52982
BP	GO:0043278	response to morphine	10/2423	33/18670	0.00724646	0.040509	0.0297047	ADCY8/PITX3/PENK/GRIN1/PRKCG/RGS4/DRD2/TACR3/TAC1/PPP1R1B	10	2.52982
BP	GO:0070232	regulation of T cell apoptotic process	10/2423	33/18670	0.00724646	0.040509	0.0297047	RAG1/RIPK3/LGALS9/ADAM8/PRKCQ/JAK3/IL7R/CD27/PDCD1/LGALS14	10	2.52982
BP	GO:0007589	body fluid secretion	21/2423	93/18670	0.00730311	0.0407872	0.0299087	CSN2/CSN3/SERPINC1/NLRP6/CDO1/FOXB1/AQP1/ADORA1/KCNN4/OXTR/TIFAB/SLC6A3/NPPB/ALOX12B/JHY/FGF10/ERBB4/DDR1/PRL/TAC1/AGR2	21	2.4004
BP	GO:0051648	vesicle localization	55/2423	306/18670	0.00731016	0.0407881	0.0299093	DRD1/CAMK2A/DYNC1I1/COL7A1/SYT9/ADRA1A/CHRNA4/SLC2A4/STX3/P2RX1/KIF5C/PIK3CG/HAP1/ITGA4/NLGN3/APBA2/PRKCB/OTOF/KIF23/AREG/TRIM46/RIMS4/RASGRP1/PFN2/ADORA2B/CHRNA5/SV2A/SNCA/DNM1/P2RY4/CHRNA6/SNPH/UNC13C/CTBP2/RAB27B/PRKCG/SYNDIG1/DOC2A/STXBP5L/SYT4/KIF5A/CDH3/SNAP25/FOLR1/DRD2/TGFA/AP3B2/UNC13A/PCLO/MAPK15/NLGN1/SYT8/CADPS/SNAP91/BICDL2	55	5.25876
BP	GO:0045807	positive regulation of endocytosis	31/2423	153/18670	0.00735529	0.0410013	0.0300656	SELE/APOA5/TREM2/RAB31/NCKAP1L/GREM1/CAV3/IL2RB/BICD1/SIRPB1/CLEC7A/CCL19/PTX3/DOCK2/IL2RG/FPR2/SIRPG/PTPRC/IFNG/SYK/SNCA/DNM1/CALY/APELA/STAP1/TNF/ABR/IL1B/SFRP4/DRD2/NLGN1	31	4.84934
BP	GO:0001710	mesodermal cell fate commitment	7/2423	19/18670	0.0074611	0.0412801	0.0302701	FOXC2/HOXA11/DKK1/FGFR1/SFRP2/EYA1/SIX2	7	2.64575
BP	GO:0002363	alpha-beta T cell lineage commitment	7/2423	19/18670	0.0074611	0.0412801	0.0302701	SLAMF6/IL12RB1/LY9/SPN/IL6/IL12B/IRF4	7	2.64575
BP	GO:0006044	N-acetylglucosamine metabolic process	7/2423	19/18670	0.0074611	0.0412801	0.0302701	CHST1/RENBP/CHST6/MGAT3/CHST3/CHST5/CHST4	7	2.64575
BP	GO:0042693	muscle cell fate commitment	7/2423	19/18670	0.0074611	0.0412801	0.0302701	TBX3/MYL2/TBX1/DKK1/FGF10/MYOD1/NKX2-5	7	1.88982
BP	GO:0046641	positive regulation of alpha-beta T cell proliferation	7/2423	19/18670	0.0074611	0.0412801	0.0302701	LGALS9/ZAP70/CD3E/PTPRC/IL18/SYK/IL12B	7	2.64575
BP	GO:0051546	keratinocyte migration	7/2423	19/18670	0.0074611	0.0412801	0.0302701	KRT2/FGF7/EPPK1/FGF10/HAS2/MMP9/KRT16	7	2.64575
BP	GO:0060973	cell migration involved in heart development	7/2423	19/18670	0.0074611	0.0412801	0.0302701	TBX5/TWIST1/FOLR1/HAND2/SEMA3C/BMP7/PITX2	7	2.64575
BP	GO:1902074	response to salt	7/2423	19/18670	0.0074611	0.0412801	0.0302701	TGFB1/PITX3/HPCA/PHEX/MAPK13/FGF23/NEFL	7	2.64575
BP	GO:0042310	vasoconstriction	18/2423	76/18670	0.00750358	0.0414764	0.030414	ACE2/DRD5/ADRA1A/HTR2B/HTR7/ASIC2/KCNMB4/P2RX1/AVPR1B/KEL/PTAFR/OXTR/PTGS2/CD38/HRH2/LEP/ADRA2A/COMP	18	2.35702
BP	GO:0002821	positive regulation of adaptive immune response	23/2423	105/18670	0.00757075	0.0418086	0.0306577	HPX/LTA/PRKCQ/IL12RB1/IL12A/CD1C/SASH3/GATA3/TNFSF13B/TGFB1/CCL19/IL2/IL6/PTPRC/IL18/IL12B/TNFRSF13C/CD1E/TNF/IL1B/CD80/CD1B/CD1A	23	4.3788
BP	GO:0007498	mesoderm development	28/2423	135/18670	0.00760717	0.0419706	0.0307765	TBX3/TEAD2/TBX1/CRB2/MIXL1/HCK/IKZF3/TLX2/IKZF1/TBX20/FOXC2/HOXA11/APELA/DKK1/HES7/FGFR1/SFRP2/NOG/ITGB4/CER1/DLL3/EYA1/LHX1/TSPY10/ITGA3/SIX2/BMP7/HMGA2	28	4.91354
BP	GO:0030042	actin filament depolymerization	14/2423	54/18670	0.00764912	0.0421236	0.0308886	ACTN2/LMOD2/SH3BP1/CARMIL1/PLEK/ADD2/SPTB/CAPG/CARMIL2/MICAL1/SCIN/SPTA1/CRACD/PLEKHH2	14	2.67261
BP	GO:0032655	regulation of interleukin-12 production	14/2423	54/18670	0.00764912	0.0421236	0.0308886	LGALS9/LILRB1/CLEC7A/CCL19/IL10/JAK3/IFNG/CCR7/SYK/IL12B/TIGIT/LTB/TLR8/ISL1	14	3.74166
BP	GO:0050854	regulation of antigen receptor-mediated signaling pathway	16/2423	65/18670	0.00773244	0.0425428	0.031196	NFAM1/LCK/PRKCB/UBASH3A/TESPA1/FCRL3/PTPRC/TRAT1/CCR7/KCNN4/LILRB4/PTPN22/STAP1/CD22/CD19/GCSAM	16	4
BP	GO:0007519	skeletal muscle tissue development	32/2423	160/18670	0.00795612	0.0437328	0.0320687	P2RX2/HLF/ANKRD2/NIBAN2/DCN/KLF5/EGR2/TBX1/TGFB1/KEL/POPDC3/ANKRD1/ASB2/TWIST1/RYR1/PITX1/ANKRD33/FOXL2/S100B/DKK1/HDAC9/CYP26B1/CHRNA1/MYH15/WNT10B/MSC/SOX11/SHOX2/VAX1/CHRND/MYOD1/DNER	32	4.94975
BP	GO:0022404	molting cycle process	20/2423	88/18670	0.00808802	0.0442933	0.0324797	LGR5/DKK4/FGF7/HPSE/IGFBP5/SOX21/DKK1/TNF/TGFB2/FGF10/WNT10A/WNT10B/GAL/HOXC13/CDH3/KRT17/MSX2/FOXN1/VANGL2/FOXE1	20	3.57771
BP	GO:0022405	hair cycle process	20/2423	88/18670	0.00808802	0.0442933	0.0324797	LGR5/DKK4/FGF7/HPSE/IGFBP5/SOX21/DKK1/TNF/TGFB2/FGF10/WNT10A/WNT10B/GAL/HOXC13/CDH3/KRT17/MSX2/FOXN1/VANGL2/FOXE1	20	3.57771
BP	GO:0061097	regulation of protein tyrosine kinase activity	20/2423	88/18670	0.00808802	0.0442933	0.0324797	ADRA1A/EPGN/GRM5/NCK2/BDNF/ADORA1/CD24/PTPRC/FCGR1A/STAP1/NCF1/DLG3/GPRC5A/ALKAL2/TGFA/LRP8/NTRK2/ADRA2A/ALKAL1/EREG	20	4.02492
BP	GO:0098773	skin epidermis development	20/2423	88/18670	0.00808802	0.0442933	0.0324797	LGR5/DKK4/FGF7/HPSE/IGFBP5/SOX21/DKK1/TNF/TGFB2/FGF10/WNT10A/WNT10B/GAL/HOXC13/CDH3/KRT17/MSX2/FOXN1/VANGL2/FOXE1	20	3.57771
BP	GO:1903034	regulation of response to wounding	35/2423	179/18670	0.00817997	0.0447555	0.0328186	REG3A/SERPINC1/TNR/F11/PLG/KLKB1/APCS/SMOC2/C1QTNF1/PRKCQ/PLEK/CLEC7A/FOXC2/IL10/EPPK1/NTRK3/HPSE/DUOX1/SYK/CCN4/SERPINE2/PDGFRA/SPP1/INSL3/F3/SIGLEC10/REG3G/AJAP1/PLAUR/FAP/UBASH3B/PDPN/MYOD1/ADRA2A/DUOX2	35	3.54965
BP	GO:0071241	cellular response to inorganic substance	41/2423	217/18670	0.00820801	0.0448674	0.0329007	CYP11B2/MT1B/CYP1A2/ACER1/CYP1A1/MT1X/ADCY8/FABP4/SYT9/MT1M/MT2A/MT1G/MT3/MT1E/GPLD1/MT1H/PPARGC1A/TRPM2/ECT2/CPNE4/IQGAP1/AQP1/MMP3/SYT3/CYBB/HPCA/PTGS2/SNCA/RYR1/NCF1/ALOX5AP/SLC25A24/DPEP1/TFAP2A/ANK3/SYT4/RASAL1/MMP9/NLGN1/SYT8/SYT13	41	1.09322
BP	GO:0061041	regulation of wound healing	30/2423	148/18670	0.00821879	0.0448849	0.0329135	REG3A/SERPINC1/F11/PLG/KLKB1/APCS/SMOC2/C1QTNF1/PRKCQ/PLEK/CLEC7A/FOXC2/EPPK1/HPSE/DUOX1/SYK/CCN4/SERPINE2/PDGFRA/INSL3/F3/REG3G/AJAP1/PLAUR/FAP/UBASH3B/PDPN/MYOD1/ADRA2A/DUOX2	30	3.28634
BP	GO:0050795	regulation of behavior	17/2423	71/18670	0.00823072	0.0449086	0.0329309	HTR2B/LEPR/RAG1/MC4R/ADORA1/HOXA1/PENK/RETN/RXFP4/MTNR1B/PTGDS/DRD2/TACR3/NRXN1/NLGN1/CRHR1/STRA6	17	2.66789
BP	GO:0007216	G protein-coupled glutamate receptor signaling pathway	6/2423	15/18670	0.00835009	0.0451027	0.0330732	GRM6/GRM5/HOMER3/GRM1/GRM3/GRM4	6	2.44949
BP	GO:0007512	adult heart development	6/2423	15/18670	0.00835009	0.0451027	0.0330732	ADRA1A/MYH6/APELA/MYH7/HAND2/NKX2-5	6	1.63299
BP	GO:0032274	gonadotropin secretion	6/2423	15/18670	0.00835009	0.0451027	0.0330732	TBX3/NIBAN2/FOXL2/INHA/LEP/FOXD1	6	1.63299
BP	GO:0032352	positive regulation of hormone metabolic process	6/2423	15/18670	0.00835009	0.0451027	0.0330732	PPARGC1A/POR/GATA3/IFNG/TNF/IL1B	6	0.816497
BP	GO:0033604	negative regulation of catecholamine secretion	6/2423	15/18670	0.00835009	0.0451027	0.0330732	P2RY12/SYT4/DRD2/ADRA2A/CRHR1/CHGA	6	2.44949
BP	GO:0043517	positive regulation of DNA damage response, signal transduction by p53 class mediator	6/2423	15/18670	0.00835009	0.0451027	0.0330732	SPRED1/PYHIN1/SPRED3/ANKRD1/PLA2R1/PMAIP1	6	2.44949
BP	GO:0045410	positive regulation of interleukin-6 biosynthetic process	6/2423	15/18670	0.00835009	0.0451027	0.0330732	CLEC7A/PTAFR/SYK/TNF/IL1B/EREG	6	2.44949
BP	GO:0051044	positive regulation of membrane protein ectodomain proteolysis	6/2423	15/18670	0.00835009	0.0451027	0.0330732	GPLD1/ADAM8/IFNG/TNF/IL1B/ADRA2A	6	1.63299
BP	GO:0072283	metanephric renal vesicle morphogenesis	6/2423	15/18670	0.00835009	0.0451027	0.0330732	GDNF/FMN1/KIF26B/LIF/LHX1/SIX2	6	1.63299
BP	GO:0098719	sodium ion import across plasma membrane	6/2423	15/18670	0.00835009	0.0451027	0.0330732	SLC9C2/SLC9A5/SLC9A3/SLC9A4/SLC9C1/HCN4	6	1.63299
BP	GO:2000095	regulation of Wnt signaling pathway, planar cell polarity pathway	6/2423	15/18670	0.00835009	0.0451027	0.0330732	NKD1/DACT1/SFRP1/MLLT3/DKK1/SFRP2	6	1.63299
BP	GO:0001659	temperature homeostasis	34/2423	173/18670	0.00836825	0.0451596	0.0331149	DRD1/CIDEA/IL13/FABP4/ACADL/LEPR/ADIPOQ/GADD45G/PPARGC1A/FFAR4/TRPM2/FABP5/FOXC2/UCP1/ACOT11/ADORA1/IL18/OXTR/SYK/IL1A/PTGS2/TNFRSF11A/IGF1R/KSR2/TNF/IL1B/PLAC8/SLN/WNT10B/LEP/DRD2/HOXC10/MFAP2/IRF4	34	2.74398
BP	GO:0006063	uronic acid metabolic process	8/2423	24/18670	0.00852188	0.0452261	0.0331636	DCXR/UGT1A3/UGT1A4/UGT2B7/SORD/UGT1A8/UGT1A5/UGT1A10	8	-0.707107
BP	GO:0019585	glucuronate metabolic process	8/2423	24/18670	0.00852188	0.0452261	0.0331636	DCXR/UGT1A3/UGT1A4/UGT2B7/SORD/UGT1A8/UGT1A5/UGT1A10	8	-0.707107
BP	GO:0062009	secondary palate development	8/2423	24/18670	0.00852188	0.0452261	0.0331636	TGFB3/TBX1/COL11A2/TGFB2/FZD1/FZD2/SOX11/FOXE1	8	2.82843
BP	GO:1903010	regulation of bone development	8/2423	24/18670	0.00852188	0.0452261	0.0331636	RGN/POR/LILRB1/GREM1/GLI3/TMEM119/RFLNA/CLDN18	8	1.41421
BP	GO:0014066	regulation of phosphatidylinositol 3-kinase signaling	26/2423	124/18670	0.00854642	0.0452261	0.0331636	IGF1/DCN/FGR/PIK3CG/PIK3CD/IER3/RASGRP1/NTRK3/SEMA4D/IL18/OSM/TWIST1/SERPINE2/PDGFRA/IGF1R/FBXL2/NCF1/TNF/TGFB2/CEP55/HGF/FGFR1/ERBB4/LEP/PTPN13/NTRK2	26	4.70679
BP	GO:0035051	cardiocyte differentiation	33/2423	167/18670	0.00855081	0.0452261	0.0331636	ACTN2/TBX3/ADRA1A/IGF1/PI16/JAG1/NEB/TBX5/MYL2/GREM1/CAV3/MYH6/TGFB1/NEBL/TWIST1/PRICKLE1/PDGFRA/G6PD/DKK1/TGFB2/RGS2/FZD7/RGS4/MYBPC2/FOLR1/TENM4/ISL1/FHOD3/HAND2/NKX2-5/SEMA3C/BMP7/PITX2	33	4.35194
BP	GO:0098693	regulation of synaptic vesicle cycle	24/2423	112/18670	0.00855821	0.0452261	0.0331636	DRD1/CAMK2A/SYT9/ADRA1A/CHRNA4/SLC2A4/P2RX1/NLGN3/APBA2/PRKCB/RIMS4/PFN2/ADORA2B/CHRNA5/SNCA/DNM1/P2RY4/CHRNA6/PRKCG/STXBP5L/SYT4/DRD2/NRXN1/NLGN1	24	2.44949
BP	GO:0003416	endochondral bone growth	12/2423	44/18670	0.008584	0.0452261	0.0331636	COL7A1/POR/COL14A1/COL12A1/VWA2/COL6A2/COL6A3/MSX2/CER1/BNC2/COMP/MMP13	12	2.3094
BP	GO:0044060	regulation of endocrine process	12/2423	44/18670	0.008584	0.0452261	0.0331636	C1QTNF3/REN/C1QTNF1/RETN/FOXL2/IL1B/INHA/FGFR1/GAL/LEP/TAC1/CRHR1	12	2.3094
BP	GO:1902667	regulation of axon guidance	12/2423	44/18670	0.008584	0.0452261	0.0331636	TBR1/PLXNA3/SEMA6D/PTPRO/SEMA3D/SEMA4D/SEMA4A/SLIT2/SEMA6A/SEMA3A/SEMA3E/SEMA3C	12	3.4641
BP	GO:0006558	L-phenylalanine metabolic process	5/2423	11/18670	0.00859448	0.0452261	0.0331636	HPD/TAT/HGD/GSTZ1/IL4I1	5	-1.34164
BP	GO:0006559	L-phenylalanine catabolic process	5/2423	11/18670	0.00859448	0.0452261	0.0331636	HPD/TAT/HGD/GSTZ1/IL4I1	5	-1.34164
BP	GO:0006681	galactosylceramide metabolic process	5/2423	11/18670	0.00859448	0.0452261	0.0331636	B3GALT1/GAL3ST1/UGT8/B3GALT2/FA2H	5	1.34164
BP	GO:0019371	cyclooxygenase pathway	5/2423	11/18670	0.00859448	0.0452261	0.0331636	PTGS1/PTGES/PTGS2/PTGIS/PTGDS	5	2.23607
BP	GO:0032060	bleb assembly	5/2423	11/18670	0.00859448	0.0452261	0.0331636	PMP22/ANLN/EMP3/LPAR1/LPAR3	5	2.23607
BP	GO:0033089	positive regulation of T cell differentiation in thymus	5/2423	11/18670	0.00859448	0.0452261	0.0331636	ADAM8/TESPA1/RASGRP1/IL7R/GLI2	5	2.23607
BP	GO:0046886	positive regulation of hormone biosynthetic process	5/2423	11/18670	0.00859448	0.0452261	0.0331636	PPARGC1A/POR/IFNG/TNF/IL1B	5	0.447214
BP	GO:0048672	positive regulation of collateral sprouting	5/2423	11/18670	0.00859448	0.0452261	0.0331636	BDNF/SEMA4D/CRABP2/LPAR3/EFNA5	5	2.23607
BP	GO:0051583	dopamine uptake involved in synaptic transmission	5/2423	11/18670	0.00859448	0.0452261	0.0331636	DRD1/SLC6A2/GDNF/SNCA/DRD2	5	-0.447214
BP	GO:0051934	catecholamine uptake involved in synaptic transmission	5/2423	11/18670	0.00859448	0.0452261	0.0331636	DRD1/SLC6A2/GDNF/SNCA/DRD2	5	-0.447214
BP	GO:0052697	xenobiotic glucuronidation	5/2423	11/18670	0.00859448	0.0452261	0.0331636	UGT1A3/UGT1A4/UGT1A8/UGT1A5/UGT1A10	5	0.447214
BP	GO:0060272	embryonic skeletal joint morphogenesis	5/2423	11/18670	0.00859448	0.0452261	0.0331636	HOXA11/HOXC11/NOG/SHOX2/BMP7	5	2.23607
BP	GO:0072310	glomerular epithelial cell development	5/2423	11/18670	0.00859448	0.0452261	0.0331636	ADIPOQ/JAG1/IQGAP1/NPHS2/FOXJ1	5	1.34164
BP	GO:1902221	erythrose 4-phosphate/phosphoenolpyruvate family amino acid metabolic process	5/2423	11/18670	0.00859448	0.0452261	0.0331636	HPD/TAT/HGD/GSTZ1/IL4I1	5	-1.34164
BP	GO:1902222	erythrose 4-phosphate/phosphoenolpyruvate family amino acid catabolic process	5/2423	11/18670	0.00859448	0.0452261	0.0331636	HPD/TAT/HGD/GSTZ1/IL4I1	5	-1.34164
BP	GO:1903011	negative regulation of bone development	5/2423	11/18670	0.00859448	0.0452261	0.0331636	RGN/LILRB1/GREM1/RFLNA/CLDN18	5	1.34164
BP	GO:1904321	response to forskolin	5/2423	11/18670	0.00859448	0.0452261	0.0331636	ADCY8/ADCY2/ADCY5/CFTR/EFNA5	5	1.34164
BP	GO:1904322	cellular response to forskolin	5/2423	11/18670	0.00859448	0.0452261	0.0331636	ADCY8/ADCY2/ADCY5/CFTR/EFNA5	5	1.34164
BP	GO:0055001	muscle cell development	36/2423	186/18670	0.00869918	0.0457364	0.0335378	ACTN2/MYH3/TBX3/P2RX2/ADRA1A/IGF1/LMOD2/PGM5/PI16/NIBAN2/NEB/MYL2/CAV3/MYH6/ANK2/KEL/NEBL/ANKRD1/PDGFRA/MYOF/RYR1/G6PD/HDAC9/WNT10B/RGS2/RGS4/MYBPC2/SHOX2/FHOD3/MYOD1/COMP/NKX2-5/TNNT1/DNER/KRT19/UCHL1	36	3.33333
BP	GO:0030072	peptide hormone secretion	46/2423	250/18670	0.00875872	0.0460085	0.0337374	GCK/ADCY8/GLUL/RASL10B/SYT9/GPLD1/KCNB1/PDX1/HNF1B/FFAR2/MC4R/IL6/ADCY5/SFRP1/ILDR1/FAM3D/IFNG/CD38/GPR119/SLC2A1/PTPRN/NKX6-1/UCN3/TNF/IL1B/SOX4/GAL/STXBP5L/TFAP2B/MTNR1B/LEP/SNAP25/GPR27/DRD2/ISL1/PCLO/ADRA2A/HTR2C/ITPR3/CRHR1/GIPR/EPHA5/CHGA/SLC30A8/CFTR/EFNA5	46	4.71814
BP	GO:0010977	negative regulation of neuron projection development	31/2423	155/18670	0.00889183	0.046625	0.0341895	MT3/TNR/PMP22/PLXNA3/MINAR1/EPHA7/SEMA6D/NLGN3/PTPRO/RAP1GAP2/TLX2/CRMP1/SEMA3D/TRIM46/DPYSL3/SEMA4D/INPP5J/CD38/SEMA4A/BCL11A/SPP1/DKK1/SLIT2/SEMA6A/ZNF365/LPAR1/SEMA3A/STMN2/NLGN1/SEMA3E/SEMA3C	31	4.84934
BP	GO:1901861	regulation of muscle tissue development	31/2423	155/18670	0.00889183	0.046625	0.0341895	IGF1/PPARGC1A/PI16/NIBAN2/TBX5/GREM1/CAV3/TBX1/TGFB1/TBX20/FGF20/IGFBP5/TWIST1/G6PD/S100B/DKK1/HDAC9/GLI1/CYP26B1/WNT10B/FGFR1/RGS2/FZD7/ERBB4/RGS4/WNT2/NOG/SHOX2/MYOD1/KCNK2/NKX2-5	31	4.84934
BP	GO:0051930	regulation of sensory perception of pain	11/2423	39/18670	0.00892316	0.0467479	0.0342796	SMR3A/SMR3B/OPRPN/TMEM100/TAFA4/P2RX3/GRM1/FABP5/IL10/ADORA1/PTAFR	11	-0.301511
BP	GO:0071277	cellular response to calcium ion	19/2423	83/18670	0.00895064	0.046809	0.0343244	ACER1/ADCY8/SYT9/GPLD1/TRPM2/ECT2/CPNE4/IQGAP1/SYT3/HPCA/RYR1/ALOX5AP/SLC25A24/DPEP1/SYT4/RASAL1/NLGN1/SYT8/SYT13	19	2.52357
BP	GO:2000106	regulation of leukocyte apoptotic process	19/2423	83/18670	0.00895064	0.046809	0.0343244	RAG1/RIPK3/LGALS9/ADAM8/LILRB1/PRKCQ/PIK3CD/CCL19/IL2/IL10/JAK3/CCR5/IL7R/CCR7/CD3G/CD27/PDCD1/BIRC7/LGALS14	19	3.90007
BP	GO:0001818	negative regulation of cytokine production	53/2423	296/18670	0.00898154	0.0468539	0.0343573	C1QTNF3/CIDEA/IL13/ADIPOQ/IGF1/CARD17/TREM2/LGALS9/FFAR4/NCKAP1L/LILRB1/TGFB3/APOD/IL12A/CD84/GATA3/IKBKE/TNFRSF21/GPR18/TGFB1/HOMER3/IL10/IL6/JAK3/CD24/PTPRC/MMP8/PTGER4/PGLYRP3/HAVCR2/IFNG/GPNMB/IL12B/TWIST1/TIGIT/PTPN22/NLRP7/SSC5D/HDAC9/TNF/TGFB2/ACOD1/TLR8/GSTP1/INHA/HGF/FGFR1/CDH3/SCGB1A1/PGLYRP4/BANK1/CHRNA7/FOXJ1	53	5.9065
BP	GO:1905207	regulation of cardiocyte differentiation	16/2423	66/18670	0.00900643	0.0468539	0.0343573	IGF1/PI16/TBX5/GREM1/CAV3/TGFB1/PRICKLE1/G6PD/DKK1/TGFB2/RGS2/FZD7/RGS4/NKX2-5/SEMA3C/BMP7	16	3.5
BP	GO:0010575	positive regulation of vascular endothelial growth factor production	9/2423	29/18670	0.0090067	0.0468539	0.0343573	TGFB1/IL6/HPSE/ADORA2B/IL1A/PTGS2/IL1B/SULF1/ISL1	9	3
BP	GO:0021602	cranial nerve morphogenesis	9/2423	29/18670	0.0090067	0.0468539	0.0343573	PLXNA3/EGR2/TBX1/HOXB3/HOXA1/GLI3/TIFAB/TFAP2A/SEMA3A	9	3
BP	GO:0055075	potassium ion homeostasis	9/2423	29/18670	0.0090067	0.0468539	0.0343573	CYP11B2/SLC12A1/ATP6V1B1/KCNJ10/KCNH2/ATP1A4/TFAP2B/ATP1A3/ATP12A	9	1.66667
BP	GO:0060536	cartilage morphogenesis	9/2423	29/18670	0.0090067	0.0468539	0.0343573	RSPO2/COL7A1/COL14A1/COL12A1/VWA2/COL6A2/COL6A3/HAND2/WNT7B	9	1.66667
BP	GO:0002011	morphogenesis of an epithelial sheet	14/2423	55/18670	0.00906367	0.0469851	0.0344535	JAG1/TBX20/CARMIL2/FLNA/BMP5/COL5A1/PDPN/SOX11/MSX2/DDR1/VANGL2/BMP7/LAMA1/MMP12	14	3.74166
BP	GO:0003229	ventricular cardiac muscle tissue development	14/2423	55/18670	0.00906367	0.0469851	0.0344535	TBX3/TBX5/MYL2/MYH6/TGFB1/DSG2/FOXC2/TNNI3/TGFB2/MYH7/NOG/ISL1/NKX2-5/COL11A1	14	3.20713
BP	GO:0032613	interleukin-10 production	14/2423	55/18670	0.00906367	0.0469851	0.0344535	TREM2/LGALS9/LILRB1/SASH3/TNFRSF21/CLEC7A/JAK3/MMP8/SYK/IL12B/TIGIT/INAVA/HGF/IRF4	14	3.74166
BP	GO:0098900	regulation of action potential	14/2423	55/18670	0.00906367	0.0469851	0.0344535	CTNNA3/ADRA1A/KCNB1/CNR2/CAV3/DSG2/CACNA2D1/CACNB3/ANK2/FLNA/ANK3/MTNR1B/TAC1/HCN4	14	2.13809
BP	GO:0060795	cell fate commitment involved in formation of primary germ layer	10/2423	34/18670	0.00909573	0.04711	0.0345451	HNF1B/SOX2/FOXC2/HOXA11/DKK1/FGFR1/FZD7/SFRP2/EYA1/SIX2	10	3.16228
BP	GO:0040013	negative regulation of locomotion	68/2423	396/18670	0.00918885	0.0475507	0.0348682	ADIPOQ/RGN/PPARGC1A/SPRED1/SINHCAF/DNAJA4/JAG1/CCL28/PLXNA3/DCN/NBL1/APOD/TBX5/GREM1/GATA3/SEMA6D/PTPRO/ADGRG1/GPR18/TGFB1/NEXMIF/PADI2/SEMA3D/LIMCH1/EPPK1/PFN2/SFRP1/ADORA1/MMP28/PTGER4/DPYSL3/EMILIN1/SEMA4D/PODN/IGFBP5/SLAMF8/FBLN1/MITF/SEMA4A/STAP1/ADGRB1/BMP5/GPR173/CYP19A1/GSTP1/ABR/SLIT2/HAS1/DPEP1/GCSAM/ERBB4/COL3A1/SEMA6A/SFRP2/ALOX15B/PLXNB3/NOG/TACSTD2/SULF1/DRD2/SEMA3A/FRMD5/KRT16/MAPK…	68	7.5186
BP	GO:0060048	cardiac muscle contraction	28/2423	137/18670	0.00931008	0.048107	0.0352762	ACE2/CTNNA3/KCNJ8/ADRA1A/KCNE2/PDE5A/MYL2/CAV3/PIK3CG/MYH6/TNNI2/DSG2/CACNA2D1/ANK2/ADORA1/SCN2B/FLNA/KCNE4/TNNI3/MYH7/KCNH2/SCN3B/CACNA1G/RGS2/NKX2-5/TNNT1/CHGA/HCN4	28	3.40168
BP	GO:0034330	cell junction organization	52/2423	290/18670	0.00932072	0.048107	0.0352762	ACTN2/CDH22/ACE2/DSG1/ANG/CDH26/SH3BP1/TGFB3/APOD/ECT2/FRMPD2/NECTIN4/PTPRO/FBLIM1/IQGAP1/TGFB1/PKP1/DSG2/FSCN1/KRT14/LIMCH1/ANK2/SFRP1/CNTNAP1/FLNA/KRT5/FMN1/INAVA/TNF/TGFB2/EPHA3/MMP14/GPBAR1/CLDN6/POF1B/COL16A1/CDH18/CDH3/CDH6/CD177/CTNND2/CADM3/ITGB4/CDH11/XIRP2/UGT8/EFNA5/LAMC2/GRHL2/PKP3/CDH17/CDH10	52	5.82435
BP	GO:0051650	establishment of vesicle localization	52/2423	290/18670	0.00932072	0.048107	0.0352762	DRD1/CAMK2A/DYNC1I1/COL7A1/SYT9/ADRA1A/CHRNA4/SLC2A4/STX3/P2RX1/KIF5C/HAP1/ITGA4/APBA2/PRKCB/OTOF/KIF23/AREG/TRIM46/RIMS4/RASGRP1/PFN2/ADORA2B/CHRNA5/SV2A/SNCA/DNM1/P2RY4/CHRNA6/SNPH/UNC13C/CTBP2/RAB27B/PRKCG/DOC2A/STXBP5L/SYT4/KIF5A/CDH3/SNAP25/FOLR1/DRD2/TGFA/AP3B2/UNC13A/PCLO/MAPK15/NLGN1/SYT8/CADPS/SNAP91/BICDL2	52	4.9923
BP	GO:1990138	neuron projection extension	33/2423	168/18670	0.00935012	0.0482166	0.0353566	MT3/TNR/SLIT3/PLXNA3/SLIT1/LIMK1/ISLR2/ITGA4/SEMA6D/NLGN3/IQGAP1/SEMA3D/TRIM46/SYT3/NTRK3/SEMA4D/SEMA4A/BCL11A/NKX6-1/SLIT2/DBN1/DCLK1/OLFM1/SYT4/SEMA6A/RASAL1/L1CAM/DDR1/UNC13A/SEMA3A/POSTN/SEMA3E/SEMA3C	33	5.04825
BP	GO:0030183	B cell differentiation	27/2423	131/18670	0.00941349	0.0485012	0.0355652	RAG1/ITM2A/NFAM1/NCKAP1L/DOCK10/ITGA4/IKZF3/IL10/GPR183/FCRL3/JAK3/SFRP1/PTPRC/SLAMF8/SYK/CD27/HDAC9/CARD11/MMP14/INHA/MS4A1/CD19/IL11/AICDA/CD79A/CR2/CDH17	27	4.81125
BP	GO:0019226	transmission of nerve impulse	17/2423	72/18670	0.00950383	0.0488816	0.0358442	CACNA1I/DRD1/DRD5/P2RX3/CLCN1/TNR/KCNMB4/P2RX1/NTRK3/CNTNAP1/SCN7A/CHRNA1/CACNA1G/ANK3/MTNR1B/NTRK2/KCND2	17	1.21268
BP	GO:0061180	mammary gland epithelium development	17/2423	72/18670	0.00950383	0.0488816	0.0358442	ESR1/TBX3/AR/FOXB1/CCL11/CAV3/GATA3/TGFB1/AREG/FGF10/ERBB4/WNT2/GLI2/MSX2/DDR1/ATP2C2/WNT7B	17	2.66789
BP	GO:0015718	monocarboxylic acid transport	32/2423	162/18670	0.00955624	0.0490659	0.0359793	SLCO1B3/SLC16A11/SLC6A13/SLC27A5/AQP9/THRSP/SLC6A12/FABP4/ABCB11/ABCB4/SLC10A1/SLC5A6/CYP4A11/SLCO1A2/SLC16A12/SLCO3A1/EMB/SLC16A3/SLC10A4/SYK/SV2A/TNFRSF11A/SLC10A2/IL1B/PLA2R1/LCN1/LEP/PLA2G4A/DRD2/PLA2G4F/PLA2G2D/STRA6	32	0.353553
BP	GO:0030833	regulation of actin filament polymerization	32/2423	162/18670	0.00955624	0.0490659	0.0359793	CTNNA2/LMOD2/RHOBTB1/COTL1/CARMIL1/SPIRE1/CCL11/NCKAP1L/BAIAP2L2/HCK/CORO1A/ADD2/SPTB/NCK2/CAPG/KIRREL1/MAGEL2/PFN2/CARMIL2/CCR7/ARHGAP28/FMN1/CCL26/SLIT2/DBN1/SCIN/SPTA1/TMSB15B/CRACD/FHOD3/FMN2/ARHGAP40	32	4.59619
BP	GO:0045216	cell-cell junction organization	31/2423	156/18670	0.00975389	0.0500373	0.0366916	CDH22/ACE2/DSG1/CDH26/TGFB3/ECT2/FRMPD2/PTPRO/TGFB1/PKP1/DSG2/FSCN1/ANK2/CNTNAP1/TNF/TGFB2/GPBAR1/CLDN6/POF1B/CDH18/CDH3/CDH6/CD177/CTNND2/CDH11/XIRP2/UGT8/GRHL2/PKP3/CDH17/CDH10	31	4.49013
BP	GO:0006027	glycosaminoglycan catabolic process	15/2423	61/18670	0.00982512	0.0503155	0.0368956	DCN/OGN/TGFB1/HPSE/PGLYRP3/OMD/PRELP/ACAN/GPC4/CEMIP/GPC2/FMOD/LUM/VCAN/PGLYRP4	15	3.87298
BP	GO:0034113	heterotypic cell-cell adhesion	15/2423	61/18670	0.00982512	0.0503155	0.0368956	CTNNA3/ADIPOQ/ITGAD/LCK/CD2/GLDN/ITGA4/ITGB2/DSG2/IL10/PTPRC/TNF/IL1B/BMP7/CEACAM6	15	2.84019
BP	GO:0008306	associative learning	18/2423	78/18670	0.00989615	0.0505917	0.0370982	DRD1/DRD5/TNR/RAG1/FOXB1/TBR1/NLGN3/GRIN1/GRIN2A/HRH2/MAP1A/SNAP25/DRD2/NPTX2/TAC1/CRHR1/PPP1R1B/GABRA5	18	2.35702
BP	GO:0072347	response to anesthetic	18/2423	78/18670	0.00989615	0.0505917	0.0370982	DRD1/ADCY8/DRD5/PITX3/OXTR/HPCA/PENK/GRIN1/SLC6A3/SNCA/PRKCG/RGS4/DRD2/TACR3/TAC1/CRHR1/HTR3A/PPP1R1B	18	2.82843
BP	GO:0043154	negative regulation of cysteine-type endopeptidase activity involved in apoptotic process	19/2423	84/18670	0.0101954	0.0518107	0.037992	MT3/RAG1/POR/TNFAIP8/BIRC3/CRYAB/AQP1/MICAL1/PTGS2/SNCA/CD27/DPEP1/HGF/PLAUR/TFAP2B/SFRP2/MMP9/WNT9A/BIRC7	19	2.9824
BP	GO:0033630	positive regulation of cell adhesion mediated by integrin	7/2423	20/18670	0.0102134	0.0518107	0.037992	NCKAP1L/CD3E/FOXC2/SYK/P2RY12/TGFB2/SFRP2	7	2.64575
BP	GO:0043369	CD4-positive or CD8-positive, alpha-beta T cell lineage commitment	7/2423	20/18670	0.0102134	0.0518107	0.037992	SLAMF6/IL12RB1/LY9/SPN/IL6/IL12B/IRF4	7	2.64575
BP	GO:0043931	ossification involved in bone maturation	7/2423	20/18670	0.0102134	0.0518107	0.037992	IGF1/GREM1/XYLT1/SEMA4D/RYR1/LEP/RFLNA	7	1.88982
BP	GO:0048670	regulation of collateral sprouting	7/2423	20/18670	0.0102134	0.0518107	0.037992	EPHA7/BDNF/SEMA4D/SPP1/CRABP2/LPAR3/EFNA5	7	2.64575
BP	GO:0060602	branch elongation of an epithelium	7/2423	20/18670	0.0102134	0.0518107	0.037992	ESR1/HNF1B/TGFB1/AREG/FGF1/FGF10/TNC	7	1.88982
BP	GO:0098698	postsynaptic specialization assembly	7/2423	20/18670	0.0102134	0.0518107	0.037992	NTRK3/NTNG2/LRFN4/GAP43/GRID2/NRXN1/NLGN1	7	2.64575
BP	GO:1901881	positive regulation of protein depolymerization	7/2423	20/18670	0.0102134	0.0518107	0.037992	ACTN2/CARMIL1/PLEK/CARMIL2/SLN/CRACD/STMN2	7	1.88982
BP	GO:1903978	regulation of microglial cell activation	7/2423	20/18670	0.0102134	0.0518107	0.037992	TREM2/IL6/PTPRC/MMP8/TAFA3/STAP1/SPHK1	7	2.64575
BP	GO:0030048	actin filament-based movement	28/2423	138/18670	0.0102718	0.0520623	0.0381766	ACTN2/MYH3/CTNNA3/KCNJ8/KCNE2/NEB/WIPF1/MYL2/CAV3/MYH2/MYH6/TNNI2/DSG2/CACNA2D1/DES/ANK2/ADORA1/SCN2B/FLNA/KCNE4/TNNI3/MYH7/KCNH2/SCN3B/CACNA1G/PDPN/MYBPC2/TNNT1	28	3.40168
BP	GO:0002526	acute inflammatory response	41/2423	220/18670	0.0103431	0.052379	0.0384088	REG3A/SAA2/CFHR4/HPR/SAA1/SERPINC1/C8A/CFHR5/C6/HP/C4BPA/CFHR2/KLKB1/C4BPB/APCS/SAA4/ADAM8/FFAR2/PIK3CG/GATA3/C2CD4A/IL6/CR1/ADORA1/PTGES/CCR7/IL1A/PTGS2/OSM/CR1L/TNFRSF11A/TNF/F3/GSTP1/IL1B/CD19/REG3G/TREM1/NPY5R/TAC1/CR2	41	1.40556
BP	GO:0050678	regulation of epithelial cell proliferation	65/2423	378/18670	0.0103595	0.0524173	0.0384368	REG3A/ODAM/VEGFD/GLUL/AR/HTR2B/ANG/IGF1/RGN/EPGN/CCL11/UHRF1/TBX1/SOX2/LAMB1/GATA3/ITGA4/TGFB1/AREG/IL10/FGF7/EPPK1/SFRP1/FGFBP1/SERPINB5/FGF1/DLX5/BCL11B/TWIST1/DLX6/APELA/PTPRN/BMP5/TNF/TGFB2/F3/GLI1/CCL26/FGF10/WNT10B/FGFR1/REG3G/FZD7/HAS2/LEP/WNT2/CDH3/SFRP2/PLXNB3/NOG/TACSTD2/SULF1/SOX11/TGFA/ISL1/EYA1/PRL/SCG2/KRT4/A4GNT/OVOL2/SGPP2/EREG/NKX2-8/MMP12	65	5.82963
BP	GO:0001843	neural tube closure	20/2423	90/18670	0.0104131	0.0526433	0.0386026	MTHFD1/PTK7/TEAD2/TGFB1/SALL4/SFRP1/TWIST1/PRICKLE1/TGFB2/FZD1/CTHRC1/SFRP2/NOG/FZD2/FOLR1/VANGL2/SPINT2/ALX1/SPINT1/GRHL2	20	4.02492
BP	GO:0048738	cardiac muscle tissue development	43/2423	233/18670	0.0104276	0.0526717	0.0386234	ACTN2/TBX3/ADRA1A/IGF1/PI16/NEB/TBX5/MYL2/GREM1/CAV3/MYH6/TGFB1/DSG2/TBX20/FOXC2/FGF20/NEBL/ANKRD1/SGCG/PDGFRA/G6PD/TNNI3/BMP5/DKK1/TGFB2/GLI1/MYH7/FGFR1/RGS2/FZD7/ERBB4/RGS4/WNT2/MYBPC2/NOG/TENM4/ISL1/FHOD3/XIRP2/KCNK2/NKX2-5/BMP7/COL11A1	43	5.33745
BP	GO:0030858	positive regulation of epithelial cell differentiation	16/2423	67/18670	0.0104418	0.0526968	0.0386418	IL13/TMEM100/ADIPOQ/GDNF/CD24/NKX6-1/ATOH1/SFRP4/WNT10B/ALOX15B/LIF/FOXN1/LHX1/OVOL2/FOXJ1/PROM1	16	2
BP	GO:1903555	regulation of tumor necrosis factor superfamily cytokine production	32/2423	163/18670	0.0104503	0.0526968	0.0386418	CIDEA/ADIPOQ/IGF1/TREM2/LGALS9/CD86/ADAM8/LILRB1/CD2/SASH3/SPN/GPR18/CLEC7A/CCL19/IL10/RASGRP1/TNFRSF8/PTPRC/MMP8/HAVCR2/IFNG/PTAFR/GPNMB/CYBB/SYK/IL12B/TWIST1/PTPN22/GSTP1/LEP/ISL1/CHRNA7	32	4.59619
BP	GO:0090101	negative regulation of transmembrane receptor protein serine/threonine kinase signaling pathway	26/2423	126/18670	0.0105235	0.0530204	0.0388791	CIDEA/GREM2/HJV/NBL1/TGFB3/GREM1/TGFB1/TBX20/SFRP1/EMILIN1/HTRA4/CHST11/SOST/CILP/DKK1/FZD1/RASL11B/CHRDL1/WNT1/HTRA3/SFRP2/NOG/CER1/FBN2/PMEPA1/VEPH1	26	3.92232
BP	GO:0010522	regulation of calcium ion transport into cytosol	22/2423	102/18670	0.0106445	0.0535844	0.0392927	DRD1/IL13/P2RX2/P2RX3/JPH1/JPH3/HAP1/CORO1A/TGFB1/P2RX5/CXCL9/TRPC3/ANK2/P2RY6/GRIN1/SNCA/CEMIP/JSRP1/CD19/UBASH3B/CALCR/TRDN	22	2.98481
BP	GO:0022029	telencephalon cell migration	14/2423	56/18670	0.0106763	0.0536992	0.0393768	DRD1/TNR/FOXB1/LAMB1/POU3F2/ADGRG1/GLI3/P2RY12/ARX/SLIT2/DRD2/SEMA3A/NRG3/CDK5R2	14	2.67261
BP	GO:0050796	regulation of insulin secretion	34/2423	176/18670	0.0108513	0.0545327	0.0399881	GCK/ADCY8/GLUL/SYT9/GPLD1/KCNB1/PDX1/ADCY5/SFRP1/FAM3D/IFNG/CD38/SLC2A1/NKX6-1/UCN3/TNF/IL1B/SOX4/STXBP5L/TFAP2B/MTNR1B/LEP/SNAP25/GPR27/DRD2/ISL1/ADRA2A/ITPR3/GIPR/EPHA5/CHGA/SLC30A8/CFTR/EFNA5	34	3.77297
BP	GO:0019835	cytolysis	11/2423	40/18670	0.0108967	0.0547145	0.0401214	GPLD1/C8A/CFHR5/C6/CFHR2/GZMB/LILRB1/TGFB1/PGLYRP3/REG3G/PGLYRP4	11	0.301511
BP	GO:0006688	glycosphingolipid biosynthetic process	8/2423	25/18670	0.0111334	0.055714	0.0408543	B3GALT1/ST8SIA2/ST8SIA1/GAL3ST1/ST6GALNAC5/UGT8/B3GALT2/FA2H	8	2.12132
BP	GO:0007214	gamma-aminobutyric acid signaling pathway	8/2423	25/18670	0.0111334	0.055714	0.0408543	GABBR2/GPR156/GABRG1/GABRA4/GABRA2/GABRR1/GABBR1/GABRA5	8	2.12132
BP	GO:0050927	positive regulation of positive chemotaxis	8/2423	25/18670	0.0111334	0.055714	0.0408543	VEGFD/ARTN/CCR4/NTRK3/CXCL8/F3/FGF10/SCG2	8	2.12132
BP	GO:0072677	eosinophil migration	8/2423	25/18670	0.0111334	0.055714	0.0408543	CCL16/CCL11/ADAM8/PTGER4/CCL22/CCL26/CCL7/SCG2	8	2.12132
BP	GO:0002701	negative regulation of production of molecular mediator of immune response	10/2423	35/18670	0.0112851	0.0562829	0.0412714	IL13RA2/LILRB1/TGFB3/TGFB1/IL10/FCRL3/JAK3/TNF/CD22/TGFB2	10	3.16228
BP	GO:0014904	myotube cell development	10/2423	35/18670	0.0112851	0.0562829	0.0412714	P2RX2/IGF1/NIBAN2/KEL/RYR1/HDAC9/WNT10B/SHOX2/MYOD1/DNER	10	1.89737
BP	GO:0045622	regulation of T-helper cell differentiation	10/2423	35/18670	0.0112851	0.0562829	0.0412714	CD86/IL12RB1/CCL19/IL2/MYB/JAK3/IL18/IL12B/CD80/IRF4	10	3.16228
BP	GO:0048333	mesodermal cell differentiation	10/2423	35/18670	0.0112851	0.0562829	0.0412714	FOXC2/HOXA11/DKK1/FGFR1/SFRP2/ITGB4/EYA1/ITGA3/SIX2/HMGA2	10	3.16228
BP	GO:0021696	cerebellar cortex morphogenesis	9/2423	30/18670	0.0114156	0.0568378	0.0416783	TRNP1/LHX5/SERPINE2/GLI1/GLI2/FAIM2/ZNF365/GRID2/LHX1	9	3
BP	GO:0048265	response to pain	9/2423	30/18670	0.0114156	0.0568378	0.0416783	SLC6A2/P2RX2/P2RX3/LPAR5/CACNA1B/PRKCG/TAC1/CRHR1/TRPA1	9	1
BP	GO:0060393	regulation of pathway-restricted SMAD protein phosphorylation	15/2423	62/18670	0.0114446	0.0569296	0.0417457	TGFB3/GREM1/LEFTY2/GDF10/TGFB1/EMILIN1/BMP5/DKK1/TGFB2/INHA/LEFTY1/NOG/BMP3/PMEPA1/BMP7	15	3.87298
BP	GO:0007015	actin filament organization	68/2423	400/18670	0.0114629	0.0569296	0.0417457	ACTN2/CTNNA2/CLRN1/ANG/LMOD2/RHOBTB1/COTL1/SH3BP1/CARMIL1/SPIRE1/CCL11/NCKAP1L/NEB/TGFB3/WIPF1/CAV3/BAIAP2L2/HCK/LIMK1/PLEK/CORO1A/ADD2/SPTB/NCK2/CAPG/RHOF/FSCN1/KIRREL1/ERMN/MAGEL2/LIMCH1/RAC2/RHOH/FSCN2/PFN2/SFRP1/CARMIL2/PTGER4/DPYSL3/MICAL1/NEBL/CCR7/FLNA/ARHGAP28/FMN1/CORO6/GAS7/EFS/CCL26/SLIT2/DBN1/FHDC1/SCIN/SPTA1/RGS4/TMSB15B/CRACD/POF1B/PLEKHH2/MYBPC2/TACSTD2/RFLNA/LPAR1/FHOD3/FMN2/TAC1/…	68	6.791
BP	GO:0010876	lipid localization	68/2423	400/18670	0.0114629	0.0569296	0.0417457	SLCO1B3/SLC27A5/AQP9/REN/CIDEA/THRSP/CFHR4/FABP4/ABCB11/APOC4/ABCB4/APOF/SLC10A1/APOC3/APOA5/APOL5/ADIPOQ/ABCA8/LPA/APOC1/CYP4A11/SLCO1A2/FITM1/PON1/LCAT/C1QTNF1/FFAR2/SPNS3/APOD/SLCO3A1/IKBKE/MYB/OSBPL10/HILPDA/IL6/ATP10B/KCNN4/SLC10A4/GULP1/SYK/RETN/TNFRSF11A/PLTP/APOA4/ABCC1/SLC10A2/SPP1/TNF/CYP19A1/GRAMD1B/IL1B/PLA2R1/LCN1/GAL/PRELID3A/FABP6/LEP/ABCA12/PLA2G4A/DRD2/PLA2G4F/ATP8A2/PLA2G2D/TAC1…	68	2.18282
BP	GO:0032147	activation of protein kinase activity	58/2423	333/18670	0.0114917	0.0570252	0.0418158	PROK1/ADCY8/SAA1/MT3/GADD45G/ANG/IGF1/MAP4K1/EPGN/RIPK3/MAP3K15/C1QTNF2/CLSPN/NCKAP1L/TGFB3/GREM1/ECT2/CARD14/CCL19/GRM1/ADCY2/ADCY5/FPR1/ADORA1/PTPRC/PROK2/NTRK3/IL18/FGF1/ADORA2B/SYK/IL12B/NRK/MAPK10/INAVA/TNF/TGFB2/FGF10/IL1B/PAK6/MUC20/HGF/GRM4/GPRC5A/LEP/DRD2/SBK2/TGFA/LPAR1/ERN2/ADRA2A/NRG3/BIRC7/CHRNA7/LPAR3/EFNA5/PAK5/WNT7B	58	5.77748
BP	GO:0030834	regulation of actin filament depolymerization	13/2423	51/18670	0.0115424	0.0571327	0.0418946	ACTN2/LMOD2/SH3BP1/CARMIL1/PLEK/ADD2/SPTB/CAPG/CARMIL2/SCIN/SPTA1/CRACD/PLEKHH2	13	2.49615
BP	GO:0045599	negative regulation of fat cell differentiation	13/2423	51/18670	0.0115424	0.0571327	0.0418946	ADIPOQ/JAG1/GATA3/TGFB1/MMP11/IL6/ID4/CCN4/TNF/WNT1/WNT10B/MSX2/C1QL4	13	3.05085
BP	GO:0048146	positive regulation of fibroblast proliferation	13/2423	51/18670	0.0115424	0.0571327	0.0418946	ESR1/IL13/IGF1/AQP1/TGFB1/MYB/PDGFRA/FGF10/S100A6/WNT1/SPHK1/WNT2/EREG	13	1.94145
BP	GO:0010811	positive regulation of cell-substrate adhesion	25/2423	121/18670	0.0117685	0.0582033	0.0426796	ECM2/COL8A1/CARMIL1/SMOC2/CCL28/ABI3BP/IQGAP1/CD3E/EGFL6/EDIL3/FBLN2/EMILIN2/SFRP1/EMILIN1/CCR7/FLNA/FMN1/CCDC80/UNC13D/HAS2/COL16A1/ITGA3/OLFM4/CEACAM6/AGR2	25	4.6
BP	GO:0010927	cellular component assembly involved in morphogenesis	24/2423	115/18670	0.011861	0.0586122	0.0429795	ACTN2/MYH3/SPACA1/LMOD2/PGM5/PMP22/NEB/MYL2/CAV3/MYH6/ANK2/PHLDB1/CNTNAP1/NEBL/ANKRD1/PDGFRA/CCDC136/MYBPC2/TENM4/FHOD3/UGT8/NKX2-5/TNNT1/KRT19	24	2.85774
BP	GO:0006493	protein O-linked glycosylation	23/2423	109/18670	0.0119143	0.0586808	0.0430298	MUCL1/GALNT13/GALNT6/MUC15/MUC12/TMTC2/B3GNT8/MUC21/GALNT7/B3GNT7/MUC20/B3GNT3/GCNT1/MUC5B/GALNT3/GCNT3/A4GNT/MUC1/MUC2/MUC5AC/GALNT5/CHST4/MUC6	23	4.79583
BP	GO:0034116	positive regulation of heterotypic cell-cell adhesion	6/2423	16/18670	0.0119146	0.0586808	0.0430298	LCK/IL10/TNF/IL1B/BMP7/CEACAM6	6	2.44949
BP	GO:0060413	atrial septum morphogenesis	6/2423	16/18670	0.0119146	0.0586808	0.0430298	TBX5/TBX20/TGFB2/SOX4/ISL1/NKX2-5	6	2.44949
BP	GO:0061548	ganglion development	6/2423	16/18670	0.0119146	0.0586808	0.0430298	ASCL1/UNC5C/RGS4/INSM1/SEMA3A/TUBB3	6	1.63299
BP	GO:0071902	positive regulation of protein serine/threonine kinase activity	58/2423	334/18670	0.0121955	0.0600145	0.0440078	PROK1/SAA1/HTR2B/ADIPOQ/GADD45G/IGF1/MAP4K1/EPGN/MAP3K15/C1QTNF2/PDE5A/ADAM8/TGFB3/PIK3CG/IQGAP1/TGFB1/CCL19/CCND2/GRM1/RASGRP1/FPR1/ADORA1/CD24/PTPRC/PROK2/NTRK3/IFNG/FGF1/ADORA2B/SYK/ROR2/TCL1A/SNCA/TNFRSF11A/NRK/CEMIP/MAPK10/DKK1/INAVA/TNF/FGF10/IL1B/MUC20/HGF/GRM4/FGFR1/MST1R/TGFA/LPAR1/ERN2/ADRA2A/VANGL2/BIRC7/CHRNA7/CDK5R2/LPAR3/HMGA2/WNT7B	58	6.0401
BP	GO:0002460	adaptive immune response based on somatic recombination of immune receptors built from immunoglobulin superfamily domains	62/2423	361/18670	0.012365	0.060798	0.0445824	C8A/C6/C4BPA/HPX/C4BPB/APCS/RIPK3/CCR6/SLAMF6/LTA/IL13RA2/JAG1/LILRB1/PRKCQ/IL12RB1/IL12A/CD1C/SASH3/CD70/GATA3/LY9/SPN/MYO1G/ULBP2/TNFSF13B/TGFB1/CCL19/IL2/ULBP3/IL10/IL6/JAK3/CR1/PTPRC/IL18/IL7R/HAVCR2/CD8A/IL12B/SEMA4A/CD27/TNFRSF13C/CD1E/TNF/TLR8/IL1B/CD80/CD19/ULBP1/UNC13D/GAPT/AIRE/IGLL1/CD1B/RAET1L/AICDA/GCNT3/IRF4/IGLL5/CD1A/CR2/FOXJ1	62	6.35001
BP	GO:0002437	inflammatory response to antigenic stimulus	12/2423	46/18670	0.0123945	0.0608418	0.0446144	SERPINC1/NLRP6/PNMA1/LTA/GATA3/IL10/RASGRP1/CCR7/IL12B/IL2RA/TNF/NPY5R	12	2.3094
BP	GO:0007157	heterophilic cell-cell adhesion via plasma membrane cell adhesion molecules	12/2423	46/18670	0.0123945	0.0608418	0.0446144	REG3A/SELE/AMIGO2/CRB2/NECTIN4/TENM3/CADM3/TENM4/GRID2/CEACAM5/NLGN1/CEACAM6	12	2.3094
BP	GO:0033865	nucleoside bisphosphate metabolic process	28/2423	140/18670	0.0124379	0.0609036	0.0446597	SULT4A1/GLYAT/SULT1B1/AASS/ACSM5/PDK4/ACSM2A/ACSM2B/ACSL6/ACSL5/BAAT/AADAT/ACSM6/GSTZ1/SULT2A1/ACSM3/ACOT6/GCDH/ACSS1/FAR1/PDP1/ACOT11/SNCA/SULT1C4/HACD1/ELOVL7/ELOVL4/SCD5	28	-1.51186
BP	GO:0033875	ribonucleoside bisphosphate metabolic process	28/2423	140/18670	0.0124379	0.0609036	0.0446597	SULT4A1/GLYAT/SULT1B1/AASS/ACSM5/PDK4/ACSM2A/ACSM2B/ACSL6/ACSL5/BAAT/AADAT/ACSM6/GSTZ1/SULT2A1/ACSM3/ACOT6/GCDH/ACSS1/FAR1/PDP1/ACOT11/SNCA/SULT1C4/HACD1/ELOVL7/ELOVL4/SCD5	28	-1.51186
BP	GO:0034032	purine nucleoside bisphosphate metabolic process	28/2423	140/18670	0.0124379	0.0609036	0.0446597	SULT4A1/GLYAT/SULT1B1/AASS/ACSM5/PDK4/ACSM2A/ACSM2B/ACSL6/ACSL5/BAAT/AADAT/ACSM6/GSTZ1/SULT2A1/ACSM3/ACOT6/GCDH/ACSS1/FAR1/PDP1/ACOT11/SNCA/SULT1C4/HACD1/ELOVL7/ELOVL4/SCD5	28	-1.51186
BP	GO:0014015	positive regulation of gliogenesis	17/2423	74/18670	0.0125179	0.0611942	0.0448728	TREM2/LTA/TGFB1/MYB/IL6/OLIG2/PTPRZ1/P2RY12/SERPINE2/NKX6-1/TNF/IL1B/ZNF488/TENM4/ZNF365/LIF/SPINT1	17	4.12311
BP	GO:1903036	positive regulation of response to wounding	17/2423	74/18670	0.0125179	0.0611942	0.0448728	REG3A/PLG/SMOC2/PLEK/CLEC7A/FOXC2/NTRK3/HPSE/DUOX1/CCN4/INSL3/F3/REG3G/PDPN/MYOD1/ADRA2A/DUOX2	17	3.15296
BP	GO:0009612	response to mechanical stimulus	39/2423	210/18670	0.012839	0.0627121	0.0459859	IL13/P2RX3/ASIC2/DCN/PDZD7/CAV3/AQP1/TGFB1/CACNB3/ASNS/TNFRSF8/TLR7/PTGER4/ANKRD1/TIFAB/PTGS2/SERPINE2/RETN/SLC2A1/SOST/SLITRK6/TLR8/IL1B/MMP14/CHRNA9/TNC/CASP5/SCEL/COL1A1/COL3A1/DRD2/POSTN/ATP8A2/NRXN1/KCNK2/STRA6/COL11A1/MMP7/TRPA1	39	5.60449
BP	GO:0019318	hexose metabolic process	45/2423	249/18670	0.0128989	0.0629527	0.0461623	C1QTNF3/GCK/DCXR/GNMT/PPP1R3G/PDK4/GPLD1/G6PC/PCK2/GCGR/SORD/PFKFB1/LEPR/ALDOB/ADIPOQ/IGF1/RGN/PPARGC1A/PGM5/BRS3/C1QTNF2/AKR1B1/PDX1/C1QTNF1/APOD/PGM2L1/FABP5/HK3/CHST1/FUT8/TKTL1/GNB3/G6PD/RUBCNL/TNF/FUT9/FUT7/FUT4/TFAP2B/PFKFB3/LEP/PKM/PFKP/PMAIP1/ENO2	45	1.0435
BP	GO:0032760	positive regulation of tumor necrosis factor production	19/2423	86/18670	0.0130983	0.0629592	0.0461671	LGALS9/CD2/SASH3/SPN/CLEC7A/CCL19/RASGRP1/TNFRSF8/PTPRC/MMP8/HAVCR2/IFNG/PTAFR/CYBB/SYK/IL12B/TWIST1/LEP/ISL1	19	4.3589
BP	GO:0050817	coagulation	59/2423	342/18670	0.0131718	0.0629592	0.0461671	P2RX2/SAA1/GP9/SERPINC1/P2RX3/SLC4A1/HBD/F11/PLG/F9/KLKB1/C4BPB/GNA15/DGKA/CARMIL1/VAV1/F13A1/ENTPD2/C1QTNF1/LCK/PRKCQ/P2RX1/PIK3CG/GATA3/TREML1/PLEK/PRKCB/P2RX5/HS3ST5/IL6/TRPC3/HPSE/MICAL1/FLNA/SYK/P2RY12/FBLN1/TFPI2/DGKK/SERPINE2/PDGFRA/F3/PRKCG/TYRO3/COL1A2/PLAUR/TRPC7/ANXA8/COL1A1/FAP/COL3A1/UBASH3B/PDPN/PF4V1/CD177/HBE1/ADRA2A/COMP/ITPR3	59	4.55661
BP	GO:0002551	mast cell chemotaxis	5/2423	12/18670	0.0131774	0.0629592	0.0461671	VEGFD/CCL11/PIK3CD/RAC2/CHGA	5	1.34164
BP	GO:0007320	insemination	5/2423	12/18670	0.0131774	0.0629592	0.0461671	EDDM3A/P2RX1/OXTR/SERPINE2/TAC1	5	1.34164
BP	GO:0010896	regulation of triglyceride catabolic process	5/2423	12/18670	0.0131774	0.0629592	0.0461671	GPLD1/APOC3/APOA5/PIK3CG/APOA4	5	-0.447214
BP	GO:0015816	glycine transport	5/2423	12/18670	0.0131774	0.0629592	0.0461671	SLC38A5/SLC6A5/RGS2/RGS4/SLC6A17	5	2.23607
BP	GO:0019374	galactolipid metabolic process	5/2423	12/18670	0.0131774	0.0629592	0.0461671	B3GALT1/GAL3ST1/UGT8/B3GALT2/FA2H	5	1.34164
BP	GO:0021559	trigeminal nerve development	5/2423	12/18670	0.0131774	0.0629592	0.0461671	PLXNA3/TIFAB/TFAP2A/ISL1/SEMA3A	5	2.23607
BP	GO:0031282	regulation of guanylate cyclase activity	5/2423	12/18670	0.0131774	0.0629592	0.0461671	RCVRN/PDZD3/HPCA/ADORA2B/GUCA2A	5	2.23607
BP	GO:0032230	positive regulation of synaptic transmission, GABAergic	5/2423	12/18670	0.0131774	0.0629592	0.0461671	ADRA1A/HAP1/OXTR/NLGN1/TAC1	5	1.34164
BP	GO:0033700	phospholipid efflux	5/2423	12/18670	0.0131774	0.0629592	0.0461671	APOC3/APOA5/APOC1/APOA4/ABCA12	5	-0.447214
BP	GO:0045416	positive regulation of interleukin-8 biosynthetic process	5/2423	12/18670	0.0131774	0.0629592	0.0461671	CLEC7A/TLR7/SYK/TNF/TLR8	5	2.23607
BP	GO:0046541	saliva secretion	5/2423	12/18670	0.0131774	0.0629592	0.0461671	AQP1/KCNN4/TIFAB/FGF10/TAC1	5	2.23607
BP	GO:0051956	negative regulation of amino acid transport	5/2423	12/18670	0.0131774	0.0629592	0.0461671	ADORA1/RGS2/RGS4/LEP/NPY5R	5	2.23607
BP	GO:0055062	phosphate ion homeostasis	5/2423	12/18670	0.0131774	0.0629592	0.0461671	SLC34A3/SFRP4/TFAP2B/FGF23/SLC34A2	5	2.23607
BP	GO:0060394	negative regulation of pathway-restricted SMAD protein phosphorylation	5/2423	12/18670	0.0131774	0.0629592	0.0461671	GREM1/EMILIN1/DKK1/NOG/PMEPA1	5	2.23607
BP	GO:0072505	divalent inorganic anion homeostasis	5/2423	12/18670	0.0131774	0.0629592	0.0461671	SLC34A3/SFRP4/TFAP2B/FGF23/SLC34A2	5	2.23607
BP	GO:0072506	trivalent inorganic anion homeostasis	5/2423	12/18670	0.0131774	0.0629592	0.0461671	SLC34A3/SFRP4/TFAP2B/FGF23/SLC34A2	5	2.23607
BP	GO:0097531	mast cell migration	5/2423	12/18670	0.0131774	0.0629592	0.0461671	VEGFD/CCL11/PIK3CD/RAC2/CHGA	5	1.34164
BP	GO:0099150	regulation of postsynaptic specialization assembly	5/2423	12/18670	0.0131774	0.0629592	0.0461671	NTRK3/LRFN4/GAP43/GRID2/NRXN1	5	2.23607
BP	GO:0150052	regulation of postsynapse assembly	5/2423	12/18670	0.0131774	0.0629592	0.0461671	NTRK3/LRFN4/GAP43/GRID2/NRXN1	5	2.23607
BP	GO:1901387	positive regulation of voltage-gated calcium channel activity	5/2423	12/18670	0.0131774	0.0629592	0.0461671	KCNE2/CACNA2D1/CACNB3/STAC/STAC2	5	1.34164
BP	GO:1905522	negative regulation of macrophage migration	5/2423	12/18670	0.0131774	0.0629592	0.0461671	MMP28/EMILIN1/SLAMF8/STAP1/CYP19A1	5	2.23607
BP	GO:2001053	regulation of mesenchymal cell apoptotic process	5/2423	12/18670	0.0131774	0.0629592	0.0461671	HNF1B/TBX1/POU3F4/MSX2/BMP7	5	2.23607
BP	GO:0030890	positive regulation of B cell proliferation	11/2423	41/18670	0.0131874	0.0629592	0.0461671	IL13/NCKAP1L/SASH3/TNFSF13B/IL2/GPR183/FCRL3/PTPRC/CD38/TNFRSF13C/CARD11	11	2.7136
BP	GO:0040019	positive regulation of embryonic development	11/2423	41/18670	0.0131874	0.0629592	0.0461671	AR/IGF1/GDNF/NIBAN2/GATA3/PHLDB1/WNT1/WNT2/DMRT2/TENM4/LHX1	11	1.50756
BP	GO:0050798	activated T cell proliferation	11/2423	41/18670	0.0131874	0.0629592	0.0461671	IGF1/RIPK3/LGALS9/IL12RB1/TNFSF9/IL2/CD24/IL18/IL12B/IL2RA/HHLA2	11	2.7136
BP	GO:2000117	negative regulation of cysteine-type endopeptidase activity	20/2423	92/18670	0.0132448	0.0631824	0.0463307	CSN2/MT3/RAG1/POR/TNFAIP8/BIRC3/CRYAB/AQP1/MICAL1/PTGS2/SNCA/CD27/DPEP1/HGF/PLAUR/TFAP2B/SFRP2/MMP9/WNT9A/BIRC7	20	2.68328
BP	GO:0046686	response to cadmium ion	15/2423	63/18670	0.0132657	0.0632312	0.0463666	MT1B/CYP1A2/MT1X/MT1M/MT2A/MT1G/MT3/MT1E/MT1H/SORD/HAAO/TERT/CYBB/NCF1/MMP9	15	-2.32379
BP	GO:0006885	regulation of pH	21/2423	98/18670	0.0133139	0.0634096	0.0464974	SLC9C2/PDK4/SLC4A1/ATP6V0E2/SLC4A8/FASLG/SLC9A5/SLC9A3/RAB39A/ATP6V1B1/SLAMF8/ATP6V0D2/RAB38/SLC9A4/ATP1A4/SLC4A11/SLC9C1/CCKBR/ATP12A/SLC4A3/CFTR	21	2.83683
BP	GO:2000146	negative regulation of cell motility	60/2423	349/18670	0.0134007	0.0637717	0.0467629	ADIPOQ/RGN/PPARGC1A/SPRED1/SINHCAF/DNAJA4/JAG1/CCL28/DCN/NBL1/APOD/TBX5/GREM1/GATA3/SEMA6D/ADGRG1/GPR18/TGFB1/NEXMIF/PADI2/LIMCH1/EPPK1/PFN2/SFRP1/ADORA1/MMP28/PTGER4/DPYSL3/EMILIN1/PODN/IGFBP5/SLAMF8/FBLN1/MITF/STAP1/ADGRB1/BMP5/GPR173/CYP19A1/GSTP1/ABR/SLIT2/HAS1/DPEP1/GCSAM/ERBB4/COL3A1/SFRP2/ALOX15B/PLXNB3/NOG/TACSTD2/SULF1/DRD2/SEMA3A/FRMD5/KRT16/MAPK15/NRG3/SPINT2	60	6.97137
BP	GO:0003179	heart valve morphogenesis	13/2423	52/18670	0.0136078	0.0642707	0.0471288	SLIT3/JAG1/TBX5/GATA3/TGFB1/TBX20/EMILIN1/TWIST1/TGFB2/SLIT2/SOX4/OLFM1/STRA6	13	3.60555
BP	GO:0032731	positive regulation of interleukin-1 beta production	13/2423	52/18670	0.0136078	0.0642707	0.0471288	LGALS9/PYHIN1/PYDC1/CLEC7A/CCL19/IFNG/NLRP7/MNDA/INAVA/TLR8/AIM2/ISL1/NLRP2	13	3.60555
BP	GO:0055078	sodium ion homeostasis	13/2423	52/18670	0.0136078	0.0642707	0.0471288	CYP11B2/SLC12A1/CYP4A11/ADORA1/ATP6V1B1/NPPB/SCN7A/ATP1A4/TFAP2B/DRD2/ATP1A3/ATP12A/TAC1	13	1.94145
BP	GO:2000677	regulation of transcription regulatory region DNA binding	13/2423	52/18670	0.0136078	0.0642707	0.0471288	IGF1/NIBAN2/GATA3/TRIM6/TGFB1/IFNG/TWIST1/ANKRD33/SOX11/MSX2/HAND2/LIF/HMGA2	13	3.05085
BP	GO:0002115	store-operated calcium entry	7/2423	21/18670	0.0136358	0.0642707	0.0471288	CD84/CRACR2B/STC2/HOMER3/ORAI2/GRAMD2A/MS4A1	7	2.64575
BP	GO:0003283	atrial septum development	7/2423	21/18670	0.0136358	0.0642707	0.0471288	TBX5/TBX20/ANK2/TGFB2/SOX4/ISL1/NKX2-5	7	2.64575
BP	GO:0010310	regulation of hydrogen peroxide metabolic process	7/2423	21/18670	0.0136358	0.0642707	0.0471288	MT3/HP/MMP3/RAC2/SNCA/DUOXA1/DUOXA2	7	1.13389
BP	GO:0014821	phasic smooth muscle contraction	7/2423	21/18670	0.0136358	0.0642707	0.0471288	DRD1/P2RX2/HTR2B/P2RX3/GDNF/TIFAB/DRD2	7	-1.13389
BP	GO:0015874	norepinephrine transport	7/2423	21/18670	0.0136358	0.0642707	0.0471288	SLC6A2/KCNB1/SLC22A1/OXTR/P2RY12/SNCA/ADRA2A	7	0.377964
BP	GO:0030277	maintenance of gastrointestinal epithelium	7/2423	21/18670	0.0136358	0.0642707	0.0471288	INAVA/CRACD/VSIG1/MUC2/TFF1/TFF2/MUC6	7	2.64575
BP	GO:0060713	labyrinthine layer morphogenesis	7/2423	21/18670	0.0136358	0.0642707	0.0471288	IL10/BMP5/SPINT2/BMP7/SPINT1/GRHL2/WNT7B	7	2.64575
BP	GO:0061213	positive regulation of mesonephros development	7/2423	21/18670	0.0136358	0.0642707	0.0471288	GDNF/GATA3/HOXB7/TGFB1/BASP1/NOG/LHX1	7	1.88982
BP	GO:0007596	blood coagulation	58/2423	336/18670	0.0137105	0.0645712	0.0473492	P2RX2/SAA1/GP9/SERPINC1/P2RX3/SLC4A1/HBD/F11/PLG/F9/KLKB1/C4BPB/GNA15/DGKA/CARMIL1/VAV1/F13A1/ENTPD2/C1QTNF1/LCK/PRKCQ/P2RX1/PIK3CG/GATA3/TREML1/PLEK/PRKCB/P2RX5/IL6/TRPC3/HPSE/MICAL1/FLNA/SYK/P2RY12/FBLN1/TFPI2/DGKK/SERPINE2/PDGFRA/F3/PRKCG/TYRO3/COL1A2/PLAUR/TRPC7/ANXA8/COL1A1/FAP/COL3A1/UBASH3B/PDPN/PF4V1/CD177/HBE1/ADRA2A/COMP/ITPR3	58	4.46442
BP	GO:0050771	negative regulation of axonogenesis	16/2423	69/18670	0.0138505	0.0649217	0.0476061	MT3/TNR/PLXNA3/EPHA7/SEMA6D/PTPRO/SEMA3D/TRIM46/SEMA4D/SEMA4A/SPP1/SLIT2/SEMA6A/SEMA3A/SEMA3E/SEMA3C	16	3
BP	GO:0055008	cardiac muscle tissue morphogenesis	16/2423	69/18670	0.0138505	0.0649217	0.0476061	MYL2/MYH6/TGFB1/TBX20/FOXC2/ANKRD1/TNNI3/TGFB2/MYH7/WNT2/MYBPC2/NOG/ISL1/XIRP2/NKX2-5/COL11A1	16	4
BP	GO:0003091	renal water homeostasis	10/2423	36/18670	0.0138507	0.0649217	0.0476061	CYP11B2/ADCY8/CYP4A11/AKR1B1/AQP1/ADCY2/ADCY5/ATP6V1B1/HAS2/TFAP2B	10	1.26491
BP	GO:0003417	growth plate cartilage development	10/2423	36/18670	0.0138507	0.0649217	0.0476061	COL7A1/POR/COL14A1/COL12A1/VWA2/COL6A2/COL6A3/CER1/COMP/MMP13	10	1.89737
BP	GO:0032733	positive regulation of interleukin-10 production	10/2423	36/18670	0.0138507	0.0649217	0.0476061	TREM2/LGALS9/SASH3/CLEC7A/SYK/IL12B/TIGIT/INAVA/HGF/IRF4	10	3.16228
BP	GO:0060428	lung epithelium development	10/2423	36/18670	0.0138507	0.0649217	0.0476061	ASCL1/IL13/FGF7/FGF10/WNT2/STRA6/FOXJ1/GRHL2/AGR2/WNT7B	10	1.89737
BP	GO:0002888	positive regulation of myeloid leukocyte mediated immunity	9/2423	31/18670	0.014275	0.0663016	0.048618	IL13/FGR/ITGB2/ITGAM/PTAFR/ADORA2B/SYK/CD177/CRHR1	9	2.33333
BP	GO:0033198	response to ATP	9/2423	31/18670	0.014275	0.0663016	0.048618	P2RX2/P2RX3/P2RX1/P2RX5/TRPC3/P2RY12/PTGS2/P2RY4/IL1B	9	1.66667
BP	GO:0034694	response to prostaglandin	9/2423	31/18670	0.014275	0.0663016	0.048618	AANAT/PTGFR/CCL19/SFRP1/PTGER4/P2RY6/CCR7/P2RY4/TNC	9	3
BP	GO:0060292	long-term synaptic depression	9/2423	31/18670	0.014275	0.0663016	0.048618	DRD1/ADCY8/DRD5/KCNB1/ADORA1/CD38/GRID2IP/SLC24A2/GRID2	9	0.333333
BP	GO:1903319	positive regulation of protein maturation	9/2423	31/18670	0.014275	0.0663016	0.048618	C6/KLKB1/ADAM8/SPON1/MELTF/IL1B/MMP14/SOX4/ASTL	9	1.66667
BP	GO:0003281	ventricular septum development	17/2423	75/18670	0.014283	0.0663016	0.048618	TBX3/PTK7/SLIT3/TBX5/GATA3/SALL4/TGFB2/SLIT2/FZD1/SOX4/NOG/FZD2/SOX11/XIRP2/VANGL2/NKX2-5/STRA6	17	3.63803
BP	GO:0001916	positive regulation of T cell mediated cytotoxicity	8/2423	26/18670	0.0142907	0.0663016	0.048618	IL12RB1/IL12A/CD1C/PTPRC/IL12B/CD1E/CD1B/CD1A	8	2.82843
BP	GO:0002360	T cell lineage commitment	8/2423	26/18670	0.0142907	0.0663016	0.048618	SLAMF6/IL12RB1/LY9/SPN/IL6/IL12B/FOXN1/IRF4	8	2.82843
BP	GO:0033561	regulation of water loss via skin	8/2423	26/18670	0.0142907	0.0663016	0.048618	ACER1/ALOX12B/CLDN4/CYP26B1/ABCA12/KRT16/ALOXE3/FA2H	8	2.12132
BP	GO:0043567	regulation of insulin-like growth factor receptor signaling pathway	8/2423	26/18670	0.0142907	0.0663016	0.048618	AR/IGF1/IGFBP5/TRIM72/CILP/BMP5/WNT1/CDH3	8	1.41421
BP	GO:0045992	negative regulation of embryonic development	8/2423	26/18670	0.0142907	0.0663016	0.048618	GATA3/GPR161/DKK1/COL5A1/FZD7/SFRP2/SULF1/BMP7	8	2.82843
BP	GO:0050926	regulation of positive chemotaxis	8/2423	26/18670	0.0142907	0.0663016	0.048618	VEGFD/ARTN/CCR4/NTRK3/CXCL8/F3/FGF10/SCG2	8	2.12132
BP	GO:1900120	regulation of receptor binding	8/2423	26/18670	0.0142907	0.0663016	0.048618	GREM2/ADIPOQ/BDNF/IL10/LDOC1/CRTAC1/NOG/MMP9	8	1.41421
BP	GO:0022037	metencephalon development	23/2423	111/18670	0.0147348	0.0683084	0.0500896	ASCL1/SSTR1/PPARGC1A/HAP1/CD3E/TRNP1/LHX5/CNTN1/GRIN1/SERPINE2/GLI1/EN1/PTF1A/WNT1/GLI2/FAIM2/ZNF365/SEZ6L/LPAR1/GRID2/LHX1/SSTR3/CDK5R2	23	3.54475
BP	GO:0014068	positive regulation of phosphatidylinositol 3-kinase signaling	19/2423	87/18670	0.0147759	0.0684456	0.0501902	IGF1/DCN/FGR/PIK3CG/PIK3CD/NTRK3/SEMA4D/IL18/OSM/PDGFRA/IGF1R/NCF1/TNF/TGFB2/HGF/FGFR1/ERBB4/LEP/NTRK2	19	3.90007
BP	GO:0021700	developmental maturation	50/2423	284/18670	0.0148002	0.0685043	0.0502333	ASCL1/REN/SEPTIN4/ANG/IGF1/TCP11/CCR6/GREM1/GATA3/GLDN/CLEC7A/CCL19/RUNX2/FEV/XYLT1/TRIP13/SEMA4D/GRIN1/TUBB8/PTPRN/RYR1/BCL11A/NKX6-1/G6PD/UNC13C/TFCP2L1/TGFB2/RAB38/WNT1/WNT10B/FGFR1/GAL/MMP2/SYT4/ADGRB3/LEP/CDH3/RFLNA/MSX2/SEZ6L/UNC13A/NRXN1/PAEP/CDK5R2/TDRD5/HOXB13/EREG/CFTR/NEFL/SIX3	50	5.37401
BP	GO:0033273	response to vitamin	20/2423	93/18670	0.0148727	0.0687862	0.0504399	CYP1A1/ASCL1/PDX1/STC2/TGFB1/SFRP1/PENK/PTGS2/PHEX/SPP1/GSTP1/CYP26B1/TNC/COL1A1/LEP/FOLR1/FGF23/POSTN/BMP7/CYP24A1	20	3.57771
BP	GO:0030838	positive regulation of actin filament polymerization	21/2423	99/18670	0.0148899	0.0688122	0.050459	CTNNA2/LMOD2/RHOBTB1/CARMIL1/SPIRE1/CCL11/NCKAP1L/BAIAP2L2/HCK/CORO1A/NCK2/KIRREL1/MAGEL2/PFN2/CARMIL2/CCR7/FMN1/CCL26/SCIN/CRACD/FMN2	21	3.27327
BP	GO:1900449	regulation of glutamate receptor signaling pathway	15/2423	64/18670	0.0153042	0.0706714	0.0518224	ACTN2/RASGRF1/PPARGC1A/GRIA4/NLGN3/IFNG/GRIN1/GRIN2A/DLG3/SHISA9/UNC13A/GRIA2/ANXA3/NLGN1/NEFL	15	2.32379
BP	GO:0006638	neutral lipid metabolic process	26/2423	130/18670	0.0155874	0.0719231	0.0527402	CYP2E1/SLC27A5/THRSP/FABP4/MOGAT2/GPLD1/G6PC/PCK2/APOC3/APOA5/ANG/RGN/APOC1/AGMO/CPS1/DGKA/CAV3/PIK3CG/FABP5/DGAT2L6/DGKK/SNCA/APOA4/GNB3/FABP6/APOBEC1	26	-0.784465
BP	GO:0010470	regulation of gastrulation	11/2423	42/18670	0.0158248	0.0729616	0.0535017	ADIPOQ/CRB2/IL10/PHLDB1/DKK1/COL5A1/FGFR1/FZD7/SFRP2/TENM4/LHX1	11	2.7136
BP	GO:0002709	regulation of T cell mediated immunity	16/2423	70/18670	0.0158512	0.0730267	0.0535495	RIPK3/LILRB1/IL12RB1/IL12A/CD1C/SASH3/GATA3/IL6/PTPRC/IL18/IL7R/IL12B/CD1E/IL1B/CD1B/CD1A	16	4
BP	GO:0033002	muscle cell proliferation	43/2423	239/18670	0.0159156	0.0732093	0.0536833	IL13/ADIPOQ/ANG/IGF1/PPARGC1A/TERT/AKR1B1/TGFB3/APOD/TBX5/IL12A/OGN/TBX20/MYB/FOXC2/PDE1A/FGF20/IL10/IL6/P2RY6/IL18/IGFBP5/IFNG/PTAFR/IL12B/PTGS2/CCN4/TNF/TGFB2/GLI1/GSTP1/FGFR1/VIPR2/ERBB4/MMP2/WNT2/NOG/TENM4/MMP9/NPY5R/KCNK2/NKX2-5/EREG	43	4.72746
BP	GO:0051402	neuron apoptotic process	43/2423	239/18670	0.0159156	0.0732093	0.0536833	ASCL1/MT3/KCNB1/RETREG1/PPARGC1A/GDNF/TERT/FOXB1/FASLG/ADAM8/TGFB3/EPHA7/GATA3/CORO1A/TNFRSF21/MYB/BDNF/FGF20/ITGAM/PITX3/PTPRZ1/GRIN1/SNCA/G6PD/EN2/TNF/TGFB2/SNCB/EN1/PRKCG/NTF4/GRM4/TFAP2A/TYRO3/TFAP2B/MTNR1B/FAIM2/EGLN3/ISL1/GRID2/NTRK2/NEFL/GABRA5	43	4.42246
BP	GO:0021879	forebrain neuron differentiation	13/2423	53/18670	0.0159453	0.0732321	0.0537	DRD1/ASCL1/TBR1/PLXNA3/LHX5/DLX5/ARX/BCL11B/SLIT2/ERBB4/DRD2/SEMA3A/LHX8	13	2.49615
BP	GO:0060563	neuroepithelial cell differentiation	13/2423	53/18670	0.0159453	0.0732321	0.0537	ASCL1/CLRN1/MYCL/JAG1/PDZD7/SLITRK6/ATOH1/SOX4/FGFR1/SOX11/INSM1/MCOLN3/ESRP1	13	1.94145
BP	GO:0071706	tumor necrosis factor superfamily cytokine production	32/2423	168/18670	0.0160037	0.0734433	0.0538549	CIDEA/ADIPOQ/IGF1/TREM2/LGALS9/CD86/ADAM8/LILRB1/CD2/SASH3/SPN/GPR18/CLEC7A/CCL19/IL10/RASGRP1/TNFRSF8/PTPRC/MMP8/HAVCR2/IFNG/PTAFR/GPNMB/CYBB/SYK/IL12B/TWIST1/PTPN22/GSTP1/LEP/ISL1/CHRNA7	32	4.59619
BP	GO:0050868	negative regulation of T cell activation	23/2423	112/18670	0.016331	0.0747508	0.0548137	LGALS9/CD86/PDE5A/LILRB1/SPN/TNFRSF21/TGFB1/IL2/IL10/JAK3/CTLA4/HAVCR2/GLI3/GPNMB/TIGIT/PTPN22/LAX1/IL2RA/CD80/SCGB1A1/PLA2G2D/FOXJ1/VTCN1	23	4.79583
BP	GO:1990748	cellular detoxification	23/2423	112/18670	0.016331	0.0747508	0.0548137	GSTM1/ADH4/MT3/HP/HBD/HBM/RGN/ABCG2/GSTZ1/S100A9/PTGS1/HBQ1/SOD3/DUOX1/PTGS2/APOA4/ALOX5AP/GPX8/TNF/GSTP1/HBE1/BMP7/DUOX2	23	1.04257
BP	GO:0006586	indolalkylamine metabolic process	6/2423	17/18670	0.0164275	0.0747508	0.0548137	IDO2/AADAT/HAAO/GCDH/AANAT/TPH1	6	-0.816497
BP	GO:0017121	phospholipid scrambling	6/2423	17/18670	0.0164275	0.0747508	0.0548137	SLC4A1/PLSCR2/XKR6/ANO4/XKR4/ANO9	6	1.63299
BP	GO:0030322	stabilization of membrane potential	6/2423	17/18670	0.0164275	0.0747508	0.0548137	KCNK10/KCNN4/KCNK9/KCNK15/KCNK12/KCNK2	6	2.44949
BP	GO:0035988	chondrocyte proliferation	6/2423	17/18670	0.0164275	0.0747508	0.0548137	MMP14/MMP16/BMPR1B/COMP/SIX2/HMGA2	6	2.44949
BP	GO:0036149	phosphatidylinositol acyl-chain remodeling	6/2423	17/18670	0.0164275	0.0747508	0.0548137	PLA2G4E/PLBD1/PLA2G4D/PLA2G4A/PLA2G4F/PLA2G2D	6	2.44949
BP	GO:0051709	regulation of killing of cells of other organism	6/2423	17/18670	0.0164275	0.0747508	0.0548137	CLEC7A/PGLYRP3/IFNG/SYK/PGLYRP4/CXCL6	6	2.44949
BP	GO:0090185	negative regulation of kidney development	6/2423	17/18670	0.0164275	0.0747508	0.0548137	ADIPOQ/HNF1B/GATA3/TACSTD2/MMP9/BMP7	6	1.63299
BP	GO:1904948	midbrain dopaminergic neuron differentiation	6/2423	17/18670	0.0164275	0.0747508	0.0548137	SFRP1/DKK1/FZD1/WNT1/WNT2/SFRP2	6	2.44949
BP	GO:1905331	negative regulation of morphogenesis of an epithelium	6/2423	17/18670	0.0164275	0.0747508	0.0548137	NKD1/GATA3/TNF/TACSTD2/SULF1/BMP7	6	1.63299
BP	GO:1901606	alpha-amino acid catabolic process	22/2423	106/18670	0.016498	0.0750141	0.0550068	GLUL/HPD/PRODH/AASS/TAT/IDO2/GLS2/HGD/DAO/ALDH6A1/UROC1/AADAT/GPT2/HAAO/GSTZ1/AMDHD1/MAT1A/CDO1/GCDH/GAD1/IL4I1/GAD2	22	-3.41121
BP	GO:2001023	regulation of response to drug	21/2423	100/18670	0.0166095	0.0754631	0.055336	DRD1/SYT9/CHRNA4/GDNF/SNCG/FGF20/IL10/SYT3/RETN/SNCA/CHRNA6/HGF/GABRA4/GAL/RGS2/RGS4/SYT4/DRD2/SYT8/HMGA2/SYT13	21	2.83683
BP	GO:0021587	cerebellum morphogenesis	10/2423	37/18670	0.0168285	0.0762823	0.0559368	TRNP1/LHX5/SERPINE2/GLI1/WNT1/GLI2/FAIM2/ZNF365/GRID2/LHX1	10	3.16228
BP	GO:0032941	secretion by tissue	10/2423	37/18670	0.0168285	0.0762823	0.0559368	NLRP6/AQP1/ADORA1/KCNN4/TIFAB/ALOX12B/JHY/FGF10/TAC1/AGR2	10	2.52982
BP	GO:1905314	semi-lunar valve development	10/2423	37/18670	0.0168285	0.0762823	0.0559368	SLIT3/JAG1/GATA3/TGFB1/TBX20/EMILIN1/TWIST1/TGFB2/SLIT2/STRA6	10	3.16228
BP	GO:0032890	regulation of organic acid transport	14/2423	59/18670	0.0168806	0.0764598	0.0560669	ACE2/CYP4A11/ADORA1/SYK/SV2A/SNCA/TNFRSF11A/IL1B/PLA2R1/RGS2/RGS4/SYT4/LEP/NPY5R	14	2.67261
BP	GO:0048634	regulation of muscle organ development	30/2423	156/18670	0.0169445	0.0766908	0.0562363	IGF1/PI16/NIBAN2/TBX5/GREM1/CAV3/TBX1/TGFB1/TBX20/FGF20/TIFAB/TWIST1/G6PD/S100B/DKK1/HDAC9/GLI1/CYP26B1/WNT10B/FGFR1/RGS2/FZD7/ERBB4/RGS4/WNT2/NOG/SHOX2/MYOD1/KCNK2/NKX2-5	30	5.11208
BP	GO:1901214	regulation of neuron death	54/2423	313/18670	0.0170666	0.0771841	0.056598	ASCL1/IL13/MT3/KCNB1/RETREG1/PPARGC1A/GDNF/TERT/FOXB1/FASLG/ADAM8/TGFB3/EPHA7/GATA3/CORO1A/ITGB2/MYB/BDNF/FGF20/IL10/ITGAM/ADORA1/PITX3/IFNG/PTPRZ1/GPNMB/GRIN1/SNCA/G6PD/EN2/DKK1/TNF/TGFB2/SNCB/FZD1/EN1/PRKCG/NTF4/GRM4/WNT1/TFAP2A/TYRO3/TFAP2B/MTNR1B/FAIM2/EGLN3/ISL1/GRID2/NTRK2/CHRNA7/CRHR1/CHGA/NEFL/GABRA5	54	5.17115
BP	GO:0009311	oligosaccharide metabolic process	12/2423	48/18670	0.0173811	0.078487	0.0575534	B3GALT1/ST8SIA2/B3GALNT1/ST6GALNAC1/FUT8/SLC2A1/GAL3ST4/ST6GAL2/FUT3/ST6GALNAC5/B3GALT2/B3GALT5	12	2.88675
BP	GO:0016339	calcium-dependent cell-cell adhesion via plasma membrane cell adhesion molecules	12/2423	48/18670	0.0173811	0.078487	0.0575534	CDH22/DSG1/CDH26/PCDHB10/PCDHB6/CDH18/CDH3/CDH6/CDH11/NLGN1/CDH17/CDH10	12	2.3094
BP	GO:0009063	cellular amino acid catabolic process	25/2423	125/18670	0.0174616	0.0787686	0.0577599	GADL1/GLUL/HPD/CTH/PRODH/AASS/TAT/IDO2/GLS2/HGD/DAO/ALDH6A1/UROC1/AADAT/GPT2/HAAO/GSTZ1/AMDHD1/MAT1A/CDO1/GCDH/BCAT1/GAD1/IL4I1/GAD2	25	-3.4
BP	GO:0002548	monocyte chemotaxis	15/2423	65/18670	0.0175757	0.0787686	0.0577599	CCL16/CCL11/NBL1/GREM1/PTPRO/CCL19/IL6/FPR2/SLAMF8/S100A14/TNFRSF11A/CCL22/CCL26/SLIT2/CCL7	15	3.35659
BP	GO:0051148	negative regulation of muscle cell differentiation	15/2423	65/18670	0.0175757	0.0787686	0.0577599	PI16/ANKRD2/CAV3/BDNF/TRIM72/G6PD/DKK1/RGS2/FZD7/RGS4/BHLHE41/TMEM119/CEACAM5/NKX2-5/EREG	15	3.87298
BP	GO:0060389	pathway-restricted SMAD protein phosphorylation	15/2423	65/18670	0.0175757	0.0787686	0.0577599	TGFB3/GREM1/LEFTY2/GDF10/TGFB1/EMILIN1/BMP5/DKK1/TGFB2/INHA/LEFTY1/NOG/BMP3/PMEPA1/BMP7	15	3.87298
BP	GO:0072678	T cell migration	15/2423	65/18670	0.0175757	0.0787686	0.0577599	RIPK3/CCR6/ZAP70/ADAM8/GPR15/APOD/PIK3CG/ITGA4/CXCR3/SPN/PIK3CD/MYO1G/GPR183/CCL26/AIRE	15	3.87298
BP	GO:0030041	actin filament polymerization	34/2423	182/18670	0.0176269	0.0787686	0.0577599	CTNNA2/ANG/LMOD2/RHOBTB1/COTL1/CARMIL1/SPIRE1/CCL11/NCKAP1L/BAIAP2L2/HCK/CORO1A/ADD2/SPTB/NCK2/CAPG/KIRREL1/MAGEL2/PFN2/CARMIL2/CCR7/ARHGAP28/FMN1/GAS7/CCL26/SLIT2/DBN1/SCIN/SPTA1/TMSB15B/CRACD/FHOD3/FMN2/ARHGAP40	34	4.45896
BP	GO:0032228	regulation of synaptic transmission, GABAergic	9/2423	32/18670	0.0176298	0.0787686	0.0577599	ADRA1A/CNR2/HAP1/ADORA1/OXTR/DRD2/NPY5R/NLGN1/TAC1	9	2.33333
BP	GO:0032814	regulation of natural killer cell activation	9/2423	32/18670	0.0176298	0.0787686	0.0577599	IL12A/RASGRP1/PGLYRP3/IL18/HAVCR2/IL12B/PTPN22/LEP/PGLYRP4	9	3
BP	GO:0042491	inner ear auditory receptor cell differentiation	9/2423	32/18670	0.0176298	0.0787686	0.0577599	CLRN1/MYCL/JAG1/PDZD7/SLITRK6/ATOH1/FGFR1/MCOLN3/ESRP1	9	1.66667
BP	GO:0045589	regulation of regulatory T cell differentiation	9/2423	32/18670	0.0176298	0.0787686	0.0577599	LGALS9/TGFB1/IL2/TNFRSF18/CR1/CTLA4/IFNG/LILRB4/IL2RA	9	3
BP	GO:0048741	skeletal muscle fiber development	9/2423	32/18670	0.0176298	0.0787686	0.0577599	P2RX2/NIBAN2/KEL/RYR1/HDAC9/WNT10B/SHOX2/MYOD1/DNER	9	2.33333
BP	GO:0048841	regulation of axon extension involved in axon guidance	9/2423	32/18670	0.0176298	0.0787686	0.0577599	PLXNA3/SEMA6D/SEMA3D/SEMA4D/SEMA4A/SEMA6A/SEMA3A/SEMA3E/SEMA3C	9	3
BP	GO:0051968	positive regulation of synaptic transmission, glutamatergic	9/2423	32/18670	0.0176298	0.0787686	0.0577599	DRD1/GLUL/TNR/NLGN3/OXTR/ROR2/PTGS2/NRXN1/NLGN1	9	1
BP	GO:0060317	cardiac epithelial to mesenchymal transition	9/2423	32/18670	0.0176298	0.0787686	0.0577599	TMEM100/JAG1/TWIST1/TGFB2/HAS2/OLFM1/WNT2/NOG/MSX2	9	2.33333
BP	GO:0046677	response to antibiotic	56/2423	327/18670	0.0176499	0.0787989	0.0577821	CYP1A1/CYP2E1/ADCY8/IL13/ADH7/ADH6/HP/ADIPOQ/CDO1/SLC2A4/CRIP1/RIPK3/TRPM2/ECT2/SPI1/GATA3/CRYAB/AQP1/CCR4/IL2/MYB/ADCY2/AREG/IL10/IL6/ADCY5/NTRK3/CYBB/PENK/GRIN1/SLC6A3/CD27/G6PD/GRIN2A/GSTP1/MAPK13/TNC/HGF/RGS2/SPHK1/RGS4/COL1A1/CCL7/LEP/PLA2G4A/SCGB1A1/DRD2/APOBEC1/PLA2G4F/CRHR1/HTR3A/CLDN18/TRPA1/CFTR/EFNA5/NEFL	56	4.8107
BP	GO:0010842	retina layer formation	7/2423	22/18670	0.0178065	0.07914	0.0580323	CALB1/PTF1A/TFAP2A/TFAP2B/LHX1/ATP8A2/PROM1	7	2.64575
BP	GO:0033622	integrin activation	7/2423	22/18670	0.0178065	0.07914	0.0580323	PLEK/FBLIM1/PTGER4/P2RY12/COL16A1/MZB1/CDH17	7	2.64575
BP	GO:0035809	regulation of urine volume	7/2423	22/18670	0.0178065	0.07914	0.0580323	SLC4A1/AKR1B1/NPPB/HAS2/TFAP2B/TRPV5/DRD2	7	1.88982
BP	GO:0045624	positive regulation of T-helper cell differentiation	7/2423	22/18670	0.0178065	0.07914	0.0580323	CD86/IL12RB1/CCL19/MYB/IL18/IL12B/CD80	7	2.64575
BP	GO:0072643	interferon-gamma secretion	7/2423	22/18670	0.0178065	0.07914	0.0580323	LGALS9/LILRB1/CD2/GATA3/RASGRP1/PTPN22/VTCN1	7	2.64575
BP	GO:1901798	positive regulation of signal transduction by p53 class mediator	7/2423	22/18670	0.0178065	0.07914	0.0580323	SPRED1/PYHIN1/SPRED3/ANKRD1/CHD5/PLA2R1/PMAIP1	7	2.64575
BP	GO:0090276	regulation of peptide hormone secretion	38/2423	208/18670	0.0178245	0.0791607	0.0580474	GCK/ADCY8/GLUL/RASL10B/SYT9/GPLD1/KCNB1/PDX1/FFAR2/ADCY5/SFRP1/ILDR1/FAM3D/IFNG/CD38/SLC2A1/NKX6-1/UCN3/TNF/IL1B/SOX4/STXBP5L/TFAP2B/MTNR1B/LEP/SNAP25/GPR27/DRD2/ISL1/ADRA2A/HTR2C/ITPR3/GIPR/EPHA5/CHGA/SLC30A8/CFTR/EFNA5	38	3.89331
BP	GO:0030534	adult behavior	28/2423	144/18670	0.0178728	0.0793155	0.0581609	DRD1/SLC1A2/OTOG/CHRNA4/GDNF/SNCG/BRS3/ADAM22/NLGN3/ATP6V1B1/GRIN1/HOXB8/CHRNA5/SNCA/SLITRK5/SLITRK6/KCNJ10/EN1/NTF4/LEP/DRD2/SEZ6L/NRXN1/DMBX1/SLITRK1/CRHR1/PPP1R1B/UCHL1	28	3.40168
BP	GO:0002825	regulation of T-helper 1 type immune response	8/2423	27/18670	0.0180515	0.0795266	0.0583157	IL12RB1/CCL19/JAK3/IL18/HAVCR2/IL12B/IL1B/CD80	8	2.82843
BP	GO:0007176	regulation of epidermal growth factor-activated receptor activity	8/2423	27/18670	0.0180515	0.0795266	0.0583157	EPGN/NCK2/ADORA1/NCF1/GPRC5A/TGFA/ADRA2A/EREG	8	2.82843
BP	GO:0015721	bile acid and bile salt transport	8/2423	27/18670	0.0180515	0.0795266	0.0583157	SLCO1B3/SLC27A5/AQP9/ABCB11/SLC10A1/SLCO1A2/SLC10A4/SLC10A2	8	-1.41421
BP	GO:0045932	negative regulation of muscle contraction	8/2423	27/18670	0.0180515	0.0795266	0.0583157	PDE5A/PIK3CG/GUCY1A1/ADORA1/ADORA2B/PTGS2/RGS2/TNNT1	8	2.82843
BP	GO:0046885	regulation of hormone biosynthetic process	8/2423	27/18670	0.0180515	0.0795266	0.0583157	PPARGC1A/POR/TRERF1/STC2/IFNG/BMP5/TNF/IL1B	8	1.41421
BP	GO:0048799	animal organ maturation	8/2423	27/18670	0.0180515	0.0795266	0.0583157	IGF1/GREM1/GATA3/XYLT1/SEMA4D/RYR1/LEP/RFLNA	8	2.12132
BP	GO:0072378	blood coagulation, fibrin clot formation	8/2423	27/18670	0.0180515	0.0795266	0.0583157	GP9/SERPINC1/F11/F9/KLKB1/F13A1/FBLN1/F3	8	-0.707107
BP	GO:0098810	neurotransmitter reuptake	8/2423	27/18670	0.0180515	0.0795266	0.0583157	DRD1/SLC6A2/SLC1A2/GDNF/SLC18A1/SNCA/KCNJ10/DRD2	8	0
BP	GO:1905208	negative regulation of cardiocyte differentiation	8/2423	27/18670	0.0180515	0.0795266	0.0583157	PI16/CAV3/PRICKLE1/G6PD/DKK1/RGS2/FZD7/RGS4	8	2.82843
BP	GO:0043200	response to amino acid	23/2423	113/18670	0.0180605	0.0795266	0.0583157	SLC1A2/PPARGC1A/CPS1/CPEB3/CDO1/PDX1/ASNS/CYBB/HPCA/GRIN1/PDGFRA/GPRC6A/BCL11A/TNF/GSTP1/COL1A2/MMP2/COL1A1/COL3A1/COL16A1/NTRK2/SST/CPEB1	23	2.71069
BP	GO:0042531	positive regulation of tyrosine phosphorylation of STAT protein	16/2423	71/18670	0.0180681	0.0795266	0.0583157	IL13/IGF1/HPX/IL12A/IL2/TNFRSF18/IL6/IL18/IFNG/IL12B/OSM/TNF/ERBB4/LEP/ISL1/LIF	16	2.5
BP	GO:0007599	hemostasis	58/2423	341/18670	0.0181862	0.0799868	0.0586532	P2RX2/SAA1/GP9/SERPINC1/P2RX3/SLC4A1/HBD/F11/PLG/F9/KLKB1/C4BPB/GNA15/DGKA/CARMIL1/VAV1/F13A1/ENTPD2/C1QTNF1/LCK/PRKCQ/P2RX1/PIK3CG/GATA3/TREML1/PLEK/PRKCB/P2RX5/IL6/TRPC3/HPSE/MICAL1/FLNA/SYK/P2RY12/FBLN1/TFPI2/DGKK/SERPINE2/PDGFRA/F3/PRKCG/TYRO3/COL1A2/PLAUR/TRPC7/ANXA8/COL1A1/FAP/COL3A1/UBASH3B/PDPN/PF4V1/CD177/HBE1/ADRA2A/COMP/ITPR3	58	4.46442
BP	GO:0048332	mesoderm morphogenesis	17/2423	77/18670	0.0183905	0.0808253	0.059268	TBX3/CRB2/TLX2/TBX20/FOXC2/HOXA11/APELA/DKK1/FGFR1/SFRP2/NOG/ITGB4/EYA1/ITGA3/SIX2/BMP7/HMGA2	17	3.63803
BP	GO:0110053	regulation of actin filament organization	46/2423	261/18670	0.0184321	0.0809481	0.0593581	ACTN2/CTNNA2/LMOD2/RHOBTB1/COTL1/SH3BP1/CARMIL1/SPIRE1/CCL11/NCKAP1L/TGFB3/BAIAP2L2/HCK/LIMK1/PLEK/CORO1A/ADD2/SPTB/NCK2/CAPG/KIRREL1/MAGEL2/LIMCH1/PFN2/SFRP1/CARMIL2/PTGER4/CCR7/FLNA/ARHGAP28/FMN1/CCL26/SLIT2/DBN1/SCIN/SPTA1/RGS4/TMSB15B/CRACD/PLEKHH2/TACSTD2/LPAR1/FHOD3/FMN2/TAC1/ARHGAP40	46	5.60279
BP	GO:0032611	interleukin-1 beta production	21/2423	101/18670	0.018481	0.0811026	0.0594714	IGF1/CARD17/TREM2/LGALS9/PYHIN1/PYDC1/CLEC7A/CCL19/IFNG/CCR7/NLRP7/MNDA/INAVA/TLR8/GSTP1/IL1B/SPHK1/GBP5/AIM2/ISL1/NLRP2	21	4.14614
BP	GO:0046470	phosphatidylcholine metabolic process	18/2423	83/18670	0.0185709	0.081398	0.059688	GPLD1/APOA5/APOC1/PON1/LCAT/PLA2G4E/PLBD1/FABP5/SLC44A4/APOA4/RAB38/MBOAT2/PLAAT1/PLA2G4D/PCYT1B/PLA2G4A/PLA2G4F/PLA2G2D	18	1.88562
BP	GO:0051353	positive regulation of oxidoreductase activity	13/2423	54/18670	0.0185758	0.081398	0.059688	HTR2B/RGN/POR/GDNF/TERT/RIPK3/PDP1/IFNG/SNCA/TNF/IL1B/CDH3/FGF23	13	0.83205
BP	GO:0007193	adenylate cyclase-inhibiting G protein-coupled receptor signaling pathway	19/2423	89/18670	0.0186332	0.0814084	0.0596956	ADCY8/GRM6/ADCY2/ADCY5/FPR2/ADORA1/MARCO/FLNA/P2RY12/GRM3/INSL3/GRM4/RGS2/RGS1/GABBR1/DRD2/LPAR1/PSAPL1/ADRA2A	19	3.90007
BP	GO:0032410	negative regulation of transporter activity	19/2423	89/18670	0.0186332	0.0814084	0.0596956	ACTN2/KCNE2/CAV3/CBARP/CACNB3/GEM/KCNE4/TWIST1/SNCA/RRAD/SLN/ANK3/MTNR1B/MMP9/DRD2/ADRA2A/TRDN/ANO9/CRHR1	19	3.44124
BP	GO:0046427	positive regulation of JAK-STAT cascade	19/2423	89/18670	0.0186332	0.0814084	0.0596956	IL13/IGF1/HPX/AKR1B1/IL12A/IL2/TNFRSF18/IL10/IL6/IL18/IFNG/IL12B/OSM/TNF/ERBB4/LEP/ISL1/LIF/PRL	19	2.9824
BP	GO:0097306	cellular response to alcohol	19/2423	89/18670	0.0186332	0.0814084	0.0596956	ADCY8/GPLD1/CYP7A1/MAP4K1/SPI1/PTGFR/ADCY2/ADCY5/SFRP1/PTGER4/P2RY6/CYBB/P2RY4/GRAMD1B/TNC/CCL7/LRP8/CFTR/EFNA5	19	2.9824
BP	GO:0031279	regulation of cyclase activity	11/2423	43/18670	0.0188381	0.0821825	0.0602633	GABBR2/DRD5/GALR3/RCVRN/PDZD3/HPCA/ADORA2B/GRM3/TIMP2/GUCA2A/CRHR1	11	1.50756
BP	GO:0042088	T-helper 1 type immune response	11/2423	43/18670	0.0188381	0.0821825	0.0602633	IL12RB1/IL12A/SPN/CCL19/JAK3/IL18/HAVCR2/IL12B/SEMA4A/IL1B/CD80	11	3.31662
BP	GO:0031334	positive regulation of protein complex assembly	47/2423	268/18670	0.0188652	0.0822401	0.0603055	ESR1/CTNNA2/TPPP2/LMOD2/RHOBTB1/CARMIL1/SPIRE1/CCL11/NCKAP1L/HNF1B/CAV3/BAIAP2L2/HCK/PLEK/CORO1A/NCK2/TGFB1/CLEC7A/MMP3/FSCN1/KIRREL1/TPPP3/MAGEL2/PFN2/CARMIL2/IFNG/CCR7/SYK/P2RY12/MITF/TWIST1/TCL1A/FMN1/TNF/CCL26/MMP1/SCIN/WNT10B/GBP5/CRACD/JCHAIN/AIM2/PMAIP1/HRK/FMN2/NKX2-5/CDH17	47	5.397
BP	GO:1901605	alpha-amino acid metabolic process	40/2423	222/18670	0.0190581	0.0824963	0.0604934	GLUL/HPD/CTH/GNMT/GLYAT/PRODH/AASS/TAT/IDO2/GLYATL1/GLS2/MTHFD1/HGD/DAO/BAAT/ALDH6A1/UROC1/BHMT/AADAT/GPT2/HAAO/GSTZ1/CPS1/AMDHD1/ADI1/MAT1A/CDO1/GCDH/ASNS/SLC6A8/SLC7A7/BCAT1/GAD1/DPEP1/CKMT1A/GFPT2/EGLN3/IL4I1/GAD2/CKMT1B	40	-2.52982
BP	GO:0006909	phagocytosis	62/2423	369/18670	0.0191264	0.0824963	0.0604934	TAFA4/LEPR/ADIPOQ/C4BPA/RHOBTB1/C4BPB/TREM2/SH3BP1/PIP4P2/RAB31/VAV1/FGR/ICAM5/NCKAP1L/WIPF1/IL2RB/HCK/LIMK1/MYH2/ICAM3/CORO1A/SIRPB1/MYO1G/ITGB2/TGFB1/CLEC7A/PTX3/DOCK2/ITGAM/IL2RG/FPR2/ADORA1/NCF2/RAB39A/SIRPG/PTPRC/P2RY6/IFNG/MARCO/GULP1/SYK/CD3G/MYO10/FCGR1A/STAP1/ADGRB1/SRPX/TNF/ABR/IL1B/XKR6/PRKCG/UNC13D/PLD4/SPHK1/IGLL1/TYRO3/PLPP4/LEP/XKR4/IGLL5/ANXA3	62	6.35001
BP	GO:0006006	glucose metabolic process	38/2423	209/18670	0.0191402	0.0824963	0.0604934	C1QTNF3/GCK/DCXR/GNMT/PPP1R3G/PDK4/GPLD1/G6PC/PCK2/GCGR/SORD/PFKFB1/LEPR/ALDOB/ADIPOQ/IGF1/RGN/PPARGC1A/PGM5/BRS3/C1QTNF2/PDX1/C1QTNF1/APOD/PGM2L1/FABP5/HK3/TKTL1/GNB3/G6PD/RUBCNL/TNF/TFAP2B/LEP/PKM/PFKP/PMAIP1/ENO2	38	0
BP	GO:0002430	complement receptor mediated signaling pathway	5/2423	13/18670	0.0191609	0.0824963	0.0604934	GPLD1/CR1/FPR1/FPR2/CR2	5	1.34164
BP	GO:0031223	auditory behavior	5/2423	13/18670	0.0191609	0.0824963	0.0604934	TIFAB/SLITRK6/DRD2/NRXN1/STRA6	5	2.23607
BP	GO:0033623	regulation of integrin activation	5/2423	13/18670	0.0191609	0.0824963	0.0604934	PLEK/FBLIM1/PTGER4/P2RY12/CDH17	5	2.23607
BP	GO:0038065	collagen-activated signaling pathway	5/2423	13/18670	0.0191609	0.0824963	0.0604934	OSCAR/SYK/COL1A1/UBASH3B/DDR1	5	2.23607
BP	GO:0042415	norepinephrine metabolic process	5/2423	13/18670	0.0191609	0.0824963	0.0604934	AKR1B1/GATA3/MOXD1/INSM1/HAND2	5	2.23607
BP	GO:0042761	very long-chain fatty acid biosynthetic process	5/2423	13/18670	0.0191609	0.0824963	0.0604934	TECRL/HACD4/HACD1/ELOVL7/ELOVL4	5	1.34164
BP	GO:0043568	positive regulation of insulin-like growth factor receptor signaling pathway	5/2423	13/18670	0.0191609	0.0824963	0.0604934	AR/IGF1/IGFBP5/WNT1/CDH3	5	0.447214
BP	GO:0045078	positive regulation of interferon-gamma biosynthetic process	5/2423	13/18670	0.0191609	0.0824963	0.0604934	CLEC7A/TLR7/IL12B/TNFRSF13C/TLR8	5	2.23607
BP	GO:0046415	urate metabolic process	5/2423	13/18670	0.0191609	0.0824963	0.0604934	SLC22A12/SLC22A11/G6PC/ABCG2/CARMIL1	5	-1.34164
BP	GO:0061052	negative regulation of cell growth involved in cardiac muscle cell development	5/2423	13/18670	0.0191609	0.0824963	0.0604934	PI16/CAV3/G6PD/RGS2/RGS4	5	2.23607
BP	GO:0061478	response to platelet aggregation inhibitor	5/2423	13/18670	0.0191609	0.0824963	0.0604934	ADCY8/ADCY2/ADCY5/CFTR/EFNA5	5	1.34164
BP	GO:0072182	regulation of nephron tubule epithelial cell differentiation	5/2423	13/18670	0.0191609	0.0824963	0.0604934	GATA3/CD24/LIF/LHX1/PROM1	5	2.23607
BP	GO:0097152	mesenchymal cell apoptotic process	5/2423	13/18670	0.0191609	0.0824963	0.0604934	HNF1B/TBX1/POU3F4/MSX2/BMP7	5	2.23607
BP	GO:1900025	negative regulation of substrate adhesion-dependent cell spreading	5/2423	13/18670	0.0191609	0.0824963	0.0604934	FBLN1/MELTF/TACSTD2/POSTN/EFNA5	5	2.23607
BP	GO:0048511	rhythmic process	51/2423	295/18670	0.0192661	0.0828324	0.0607399	SOX14/PROK1/ESR1/HLF/ADIPOQ/PPARGC1A/HTR7/SLIT3/HNF1B/TGFB3/EGR2/AANAT/PTX3/MAGEL2/ADORA1/PROK2/NTRK3/ID4/OXTR/TWIST1/RETN/PDGFRA/TNFRSF11A/PTPRN/TPH1/MAPK10/CLDN4/TGFB2/HES7/SLIT2/HAS1/PRKCG/TYRO3/HAS2/MTNR1B/SPSB4/LEP/RORB/BHLHE41/PTGDS/DRD2/NPY5R/BMPR1B/NTRK2/KCND2/NHLH2/NLGN1/PASD1/MMP7/EREG/SIX3	51	5.46109
BP	GO:0016054	organic acid catabolic process	48/2423	275/18670	0.0192809	0.0828324	0.0607399	ABHD1/DCXR/GADL1/GLUL/HPD/CTH/PRODH/AASS/TAT/IDO2/ACADL/CYP39A1/GLS2/AMACR/PCK2/SORD/HGD/DAO/ADIPOQ/ALDH6A1/EHHADH/UROC1/AADAT/GPT2/CYP4A11/LDHD/HAAO/GSTZ1/HAO1/PON1/AMDHD1/SULT2A1/MAT1A/CDO1/GCDH/TGFB1/RENBP/CRABP1/GLYATL2/TWIST1/ALDH1L2/BCAT1/CEMIP/CYP26B1/GAD1/LEP/IL4I1/GAD2	48	-3.17543
BP	GO:0046395	carboxylic acid catabolic process	48/2423	275/18670	0.0192809	0.0828324	0.0607399	ABHD1/DCXR/GADL1/GLUL/HPD/CTH/PRODH/AASS/TAT/IDO2/ACADL/CYP39A1/GLS2/AMACR/PCK2/SORD/HGD/DAO/ADIPOQ/ALDH6A1/EHHADH/UROC1/AADAT/GPT2/CYP4A11/LDHD/HAAO/GSTZ1/HAO1/PON1/AMDHD1/SULT2A1/MAT1A/CDO1/GCDH/TGFB1/RENBP/CRABP1/GLYATL2/TWIST1/ALDH1L2/BCAT1/CEMIP/CYP26B1/GAD1/LEP/IL4I1/GAD2	48	-3.17543
BP	GO:0003014	renal system process	24/2423	120/18670	0.0195711	0.0839573	0.0615647	CYP11B2/ADCY8/REN/ADRA1A/ADIPOQ/SLC4A1/CYP4A11/AKR1B1/PTPRO/AQP1/ADCY2/ADCY5/ADORA1/ATP6V1B1/NPPB/CLDN4/HAS2/TFAP2B/TRPV5/JCHAIN/SULF1/DRD2/ITGA3/TAC1	24	2.04124
BP	GO:0072089	stem cell proliferation	24/2423	120/18670	0.0195711	0.0839573	0.0615647	ASCL1/TBX3/TERT/TGFB1/SMARCD3/ARTN/PTPRC/ID4/GLI3/FBLN1/HHIP/WNT1/WNT10B/FGFR1/SFRP2/SOX11/DRD2/VAX1/EPCAM/OVOL2/SIX2/HMGA2/SIX3/WNT7B	24	3.67423
BP	GO:0006959	humoral immune response	60/2423	356/18670	0.0197025	0.0844598	0.0619332	REG3A/KLK3/CFHR4/C8A/CFHR5/C6/C4BPA/CFHR2/HPX/C4BPB/APCS/TREM2/CCR6/KLK7/S100A9/LTA/CFD/GATA3/TNFRSF21/SH2D1A/PI3/CXCL9/GPR183/IL6/CR1/PTPRC/PGLYRP3/IFNG/CCR7/CR1L/CXCL3/CXCL8/TNF/ACOD1/IL1B/MS4A1/CD19/BPIFA2/REG3G/AIRE/IGLL1/TREM1/PDCD1/PF4V1/JCHAIN/POU2AF1/CXCL1/MNX1/BPIFB1/PGLYRP4/IGLL5/CXCL6/CR2/CHGA/BPIFA1/FOXJ1/DEFA5/DMBT1/PRSS2/CXCL5	60	4.90578
BP	GO:0002688	regulation of leukocyte chemotaxis	23/2423	114/18670	0.0199303	0.0853744	0.0626038	VEGFD/CCR6/LGALS9/NCKAP1L/NBL1/GREM1/IL12A/GPR18/CCL19/PADI2/RAC2/IL6/FPR2/MMP28/CCR7/SLAMF8/S100A14/STAP1/CXCL8/CYP19A1/SLIT2/CCL7/CXCL14	23	4.3788
BP	GO:0021872	forebrain generation of neurons	15/2423	66/18670	0.0200961	0.0860223	0.0630789	DRD1/ASCL1/TBR1/PLXNA3/LHX5/GLI3/DLX5/ARX/BCL11B/SLIT2/FGFR1/ERBB4/DRD2/SEMA3A/LHX8	15	2.84019
BP	GO:0007190	activation of adenylate cyclase activity	10/2423	38/18670	0.0202539	0.0865101	0.0634367	DRD1/ADCY8/DRD5/LGR5/ADCY2/ADCY5/ADORA2B/VIPR2/CRHR1/GIPR	10	0.632456
BP	GO:0010831	positive regulation of myotube differentiation	10/2423	38/18670	0.0202539	0.0865101	0.0634367	NIBAN2/CAV3/TBX1/CD53/CXCL9/ADGRB1/CYP26B1/MMP14/SHOX2/MYOD1	10	3.16228
BP	GO:1901021	positive regulation of calcium ion transmembrane transporter activity	10/2423	38/18670	0.0202539	0.0865101	0.0634367	KCNE2/RGN/HAP1/CACNA2D1/CACNB3/ANK2/P2RY6/STAC/STAC2/TRDN	10	1.89737
BP	GO:0071715	icosanoid transport	12/2423	49/18670	0.0203769	0.0869102	0.06373	CYP4A11/SLCO3A1/SYK/TNFRSF11A/ABCC1/IL1B/PLA2R1/LEP/PLA2G4A/DRD2/PLA2G4F/PLA2G2D	12	2.88675
BP	GO:1901571	fatty acid derivative transport	12/2423	49/18670	0.0203769	0.0869102	0.06373	CYP4A11/SLCO3A1/SYK/TNFRSF11A/ABCC1/IL1B/PLA2R1/LEP/PLA2G4A/DRD2/PLA2G4F/PLA2G2D	12	2.88675
BP	GO:0021549	cerebellum development	21/2423	102/18670	0.0205127	0.0873326	0.0640398	SSTR1/PPARGC1A/HAP1/CD3E/TRNP1/LHX5/CNTN1/SERPINE2/GLI1/EN1/PTF1A/WNT1/GLI2/FAIM2/ZNF365/SEZ6L/LPAR1/GRID2/LHX1/SSTR3/CDK5R2	21	3.7097
BP	GO:0032272	negative regulation of protein polymerization	16/2423	72/18670	0.020515	0.0873326	0.0640398	LMOD2/CARMIL1/ADD2/SPTB/CAPG/PFN2/CARMIL2/INPP5J/SNCA/SLIT2/SCIN/SPTA1/TMSB15B/CRACD/FHOD3/STMN2	16	3.5
BP	GO:0050864	regulation of B cell activation	34/2423	184/18670	0.0205202	0.0873326	0.0640398	IL13/NFAM1/NCKAP1L/SASH3/TNFRSF21/IKZF3/TNFSF13B/TGFB1/IL2/IL10/GPR183/FCRL3/IL6/SFRP1/SAMSN1/PTPRC/CTLA4/SLAMF8/SYK/CD38/CD27/MNDA/TNFRSF13C/CD22/TNFRSF13B/CARD11/MMP14/INHA/CD19/IGLL1/MZB1/IGLL5/BANK1/FOXJ1	34	5.48795
BP	GO:0016202	regulation of striated muscle tissue development	29/2423	152/18670	0.0206109	0.0876556	0.0642766	IGF1/PI16/NIBAN2/TBX5/GREM1/CAV3/TBX1/TGFB1/TBX20/FGF20/TWIST1/G6PD/S100B/DKK1/HDAC9/GLI1/CYP26B1/WNT10B/FGFR1/RGS2/FZD7/ERBB4/RGS4/WNT2/NOG/SHOX2/MYOD1/KCNK2/NKX2-5	29	5.01377
BP	GO:0008589	regulation of smoothened signaling pathway	17/2423	78/18670	0.0207578	0.0880903	0.0645954	POR/CD3E/GLIS2/RUNX2/GAS1/SFRP1/GPR161/GLI3/SERPINE2/HHIP/GLI1/FGF10/DCDC2/PRRX1/RFX4/SHOX2/WNT9A	17	3.63803
BP	GO:0032413	negative regulation of ion transmembrane transporter activity	17/2423	78/18670	0.0207578	0.0880903	0.0645954	ACTN2/KCNE2/CAV3/CBARP/CACNB3/GEM/KCNE4/RRAD/SLN/ANK3/MTNR1B/MMP9/DRD2/ADRA2A/TRDN/ANO9/CRHR1	17	3.15296
BP	GO:0043407	negative regulation of MAP kinase activity	17/2423	78/18670	0.0207578	0.0880903	0.0645954	ADIPOQ/SPRED1/DUSP2/CAV3/SFRP1/SPRED3/PTPN22/LAX1/GSTP1/IL1B/RGS2/DUSP4/RGS4/SFRP2/SERPINB3/BMP7/UCHL1	17	3.63803
BP	GO:0032651	regulation of interleukin-1 beta production	19/2423	90/18670	0.0208329	0.0882503	0.0647127	IGF1/CARD17/TREM2/LGALS9/PYHIN1/PYDC1/CLEC7A/CCL19/IFNG/CCR7/NLRP7/MNDA/INAVA/TLR8/GSTP1/SPHK1/AIM2/ISL1/NLRP2	19	3.90007
BP	GO:0046889	positive regulation of lipid biosynthetic process	18/2423	84/18670	0.0208551	0.0882503	0.0647127	GPLD1/HSD17B13/CYP7A1/APOA5/HTR2B/RGN/PPARGC1A/POR/CGA/FPR2/IFNG/FGF1/PTGS2/APOA4/TNF/RAB38/IL1B/HTR2C	18	0
BP	GO:0048144	fibroblast proliferation	18/2423	84/18670	0.0208551	0.0882503	0.0647127	ESR1/IL13/IGF1/LTA/AQP1/TGFB1/MYB/SFRP1/PDGFRA/FGF10/S100A6/GSTP1/WNT1/SPHK1/WNT2/C1QL4/EREG/WNT7B	18	2.82843
BP	GO:0060420	regulation of heart growth	18/2423	84/18670	0.0208551	0.0882503	0.0647127	IGF1/PI16/TBX5/CAV3/MYH6/TBX20/FGF20/G6PD/GLI1/BASP1/FGFR1/RGS2/ERBB4/RGS4/WNT2/NOG/KCNK2/NKX2-5	18	3.77124
BP	GO:0032368	regulation of lipid transport	25/2423	127/18670	0.0210261	0.0889103	0.0651967	REN/ABCB4/APOC3/APOA5/ADIPOQ/APOC1/CYP4A11/PON1/C1QTNF1/MYB/SYK/RETN/TNFRSF11A/PLTP/APOA4/SPP1/CYP19A1/IL1B/PLA2R1/GAL/LEP/ABCA12/ATP8A2/TAC1/CRHR1	25	1.8
BP	GO:0048675	axon extension	24/2423	121/18670	0.0215017	0.0907545	0.066549	MT3/TNR/SLIT3/PLXNA3/SLIT1/LIMK1/ISLR2/SEMA6D/NLGN3/SEMA3D/TRIM46/NTRK3/SEMA4D/SEMA4A/NKX6-1/SLIT2/DBN1/DCLK1/OLFM1/SEMA6A/L1CAM/SEMA3A/SEMA3E/SEMA3C	24	4.08248
BP	GO:0046633	alpha-beta T cell proliferation	9/2423	33/18670	0.0215235	0.0907545	0.066549	LGALS9/ZAP70/CD3E/DOCK2/PTPRC/IL18/SYK/IL12B/ELF4	9	3
BP	GO:0051955	regulation of amino acid transport	9/2423	33/18670	0.0215235	0.0907545	0.066549	ACE2/ADORA1/SV2A/SNCA/RGS2/RGS4/SYT4/LEP/NPY5R	9	2.33333
BP	GO:1901380	negative regulation of potassium ion transmembrane transport	9/2423	33/18670	0.0215235	0.0907545	0.066549	ACTN2/KCNE2/CAV3/KEL/KCNE4/KCNH2/ANK3/RGS4/MTNR1B	9	1.66667
BP	GO:0006665	sphingolipid metabolic process	30/2423	159/18670	0.0216878	0.0913821	0.0670092	ACER1/B3GALT1/CERKL/HACD4/ST8SIA2/ST8SIA1/P2RX1/B3GALNT1/GAL3ST1/SMPDL3B/DEGS2/PLPP2/ALOX12B/TNF/FUT7/SPHK1/HACD1/ELOVL7/ELOVL4/FUT3/PSAPL1/ST6GALNAC5/SPTSSB/UGT8/ITGB8/B3GALT2/ALOXE3/SGPP2/ALDH3B2/FA2H	30	4.74693
BP	GO:0046660	female sex differentiation	23/2423	115/18670	0.0219476	0.0922061	0.0676134	ESR1/TBX3/ANG/SLIT3/PTX3/SFRP1/RETN/PDGFRA/PTPRN/FOXL2/FGF10/CYP19A1/SLIT2/MMP14/INHA/TYRO3/LEP/PCYT1B/BMPR1B/LHX1/LHX8/STRA6/EREG	23	3.54475
BP	GO:0003414	chondrocyte morphogenesis involved in endochondral bone morphogenesis	6/2423	18/18670	0.0219924	0.0922061	0.0676134	COL7A1/COL14A1/COL12A1/VWA2/COL6A2/COL6A3	6	1.63299
BP	GO:0003429	growth plate cartilage chondrocyte morphogenesis	6/2423	18/18670	0.0219924	0.0922061	0.0676134	COL7A1/COL14A1/COL12A1/VWA2/COL6A2/COL6A3	6	1.63299
BP	GO:0045683	negative regulation of epidermis development	6/2423	18/18670	0.0219924	0.0922061	0.0676134	REG3A/DKK4/REG3G/CDH3/MSX2/GRHL2	6	0.816497
BP	GO:0072077	renal vesicle morphogenesis	6/2423	18/18670	0.0219924	0.0922061	0.0676134	GDNF/FMN1/KIF26B/LIF/LHX1/SIX2	6	1.63299
BP	GO:0090171	chondrocyte morphogenesis	6/2423	18/18670	0.0219924	0.0922061	0.0676134	COL7A1/COL14A1/COL12A1/VWA2/COL6A2/COL6A3	6	1.63299
BP	GO:0090330	regulation of platelet aggregation	6/2423	18/18670	0.0219924	0.0922061	0.0676134	C1QTNF1/PRKCQ/SYK/SERPINE2/UBASH3B/PDPN	6	2.44949
BP	GO:0003197	endocardial cushion development	11/2423	44/18670	0.0222562	0.0930484	0.0682311	TMEM100/JAG1/TBX5/TBX20/TWIST1/BMP5/TGFB2/NOG/MSX2/ISL1/BMP7	11	2.7136
BP	GO:0044331	cell-cell adhesion mediated by cadherin	11/2423	44/18670	0.0222562	0.0930484	0.0682311	CDH22/PLG/CDH26/NEXMIF/CDH18/CDH3/CDH6/CDH11/EPCAM/CDH17/CDH10	11	2.11058
BP	GO:0046189	phenol-containing compound biosynthetic process	11/2423	44/18670	0.0222562	0.0930484	0.0682311	DAO/GATA3/SLC6A3/SNCA/OCA2/TPH1/TGFB2/MOXD1/CDH3/INSM1/HAND2	11	2.7136
BP	GO:0060412	ventricular septum morphogenesis	11/2423	44/18670	0.0222562	0.0930484	0.0682311	TBX3/SLIT3/TGFB2/SLIT2/FZD1/SOX4/NOG/FZD2/SOX11/VANGL2/NKX2-5	11	2.7136
BP	GO:0003170	heart valve development	14/2423	61/18670	0.0223353	0.0931571	0.0683108	SLIT3/JAG1/TBX5/GATA3/TGFB1/TBX20/EMILIN1/TWIST1/TGFB2/SLIT2/SOX4/OLFM1/SHOX2/STRA6	14	3.74166
BP	GO:0051261	protein depolymerization	22/2423	109/18670	0.0223549	0.0931571	0.0683108	ACTN2/LMOD2/SH3BP1/CARMIL1/HDGFL3/KIF18A/KIF2C/PLEK/ADD2/KIF18B/SPTB/CAPG/CARMIL2/MICAL1/STMN3/SLN/SCIN/MAP1A/SPTA1/CRACD/PLEKHH2/STMN2	22	3.83761
BP	GO:0062013	positive regulation of small molecule metabolic process	29/2423	153/18670	0.0223751	0.0931571	0.0683108	GCK/PPP1R3G/GPLD1/CYP7A1/PFKFB1/APOA5/ADIPOQ/IGF1/RGN/PPARGC1A/POR/TREM2/C1QTNF2/RCVRN/P2RY6/IFNG/PTAFR/FGF1/ADORA2B/PTGS2/TWIST1/SNCA/APOA4/TNF/IL1B/HAS2/PFKFB3/GUCA2A/PMAIP1	29	1.29987
BP	GO:0032355	response to estradiol	26/2423	134/18670	0.0224229	0.0931571	0.0683108	CYP1A2/ESR1/SSTR1/PPARGC1A/KIF18A/CRYAB/PTGFR/TGFB1/AREG/IL10/SFRP1/OXTR/PENK/PTGS2/CD38/FGF10/GSTP1/COL1A1/LEP/MSX2/ARNT2/MYOD1/TACR3/POSTN/SSTR3/BMP7	26	3.53009
BP	GO:0001516	prostaglandin biosynthetic process	8/2423	28/18670	0.022471	0.0931571	0.0683108	PTGS1/FABP5/PTGES/PTGS2/IL1B/PTGIS/PTGDS/PLA2G4F	8	2.82843
BP	GO:0001958	endochondral ossification	8/2423	28/18670	0.022471	0.0931571	0.0683108	CSGALNACT1/RUNX2/DLX5/MMP14/COL1A1/MMP16/TMEM119/MMP13	8	2.82843
BP	GO:0003180	aortic valve morphogenesis	8/2423	28/18670	0.022471	0.0931571	0.0683108	SLIT3/JAG1/GATA3/TGFB1/TBX20/EMILIN1/TWIST1/SLIT2	8	2.82843
BP	GO:0008209	androgen metabolic process	8/2423	28/18670	0.022471	0.0931571	0.0683108	CYP3A4/ESR1/SRD5A2/UGT2B7/PPARGC1A/HSD17B6/SPP1/CYP19A1	8	-1.41421
BP	GO:0032770	positive regulation of monooxygenase activity	8/2423	28/18670	0.022471	0.0931571	0.0683108	HTR2B/POR/GDNF/TERT/IFNG/TNF/IL1B/CDH3	8	0
BP	GO:0036075	replacement ossification	8/2423	28/18670	0.022471	0.0931571	0.0683108	CSGALNACT1/RUNX2/DLX5/MMP14/COL1A1/MMP16/TMEM119/MMP13	8	2.82843
BP	GO:0046457	prostanoid biosynthetic process	8/2423	28/18670	0.022471	0.0931571	0.0683108	PTGS1/FABP5/PTGES/PTGS2/IL1B/PTGIS/PTGDS/PLA2G4F	8	2.82843
BP	GO:0085029	extracellular matrix assembly	8/2423	28/18670	0.022471	0.0931571	0.0683108	TGFB1/MFAP4/EMILIN1/ANTXR1/QSOX1/HAS1/HAS2/COL1A2	8	2.82843
BP	GO:0007229	integrin-mediated signaling pathway	21/2423	103/18670	0.022713	0.0939872	0.0689195	ITGAD/VAV1/FGR/HCK/ITGA4/PLEK/ITGB2/PLP1/FUT8/ITGAM/FYB1/FLNA/SYK/COL3A1/COL16A1/CD177/ITGB6/ITGB4/ITGA3/ITGB8/CDH17	21	4.58258
BP	GO:0016338	calcium-independent cell-cell adhesion via plasma membrane cell-adhesion molecules	7/2423	23/18670	0.0227982	0.0939872	0.0689195	CLDN2/CLDN8/CLDN11/CLDN4/CLDN6/CLDN18/CLDN10	7	1.13389
BP	GO:0034695	response to prostaglandin E	7/2423	23/18670	0.0227982	0.0939872	0.0689195	AANAT/CCL19/SFRP1/PTGER4/P2RY6/CCR7/P2RY4	7	2.64575
BP	GO:0061436	establishment of skin barrier	7/2423	23/18670	0.0227982	0.0939872	0.0689195	ALOX12B/CLDN4/CYP26B1/ABCA12/KRT16/ALOXE3/FA2H	7	2.64575
BP	GO:0070977	bone maturation	7/2423	23/18670	0.0227982	0.0939872	0.0689195	IGF1/GREM1/XYLT1/SEMA4D/RYR1/LEP/RFLNA	7	1.88982
BP	GO:0089718	amino acid import across plasma membrane	7/2423	23/18670	0.0227982	0.0939872	0.0689195	SLC1A2/SLC7A1/SLC6A5/SLC1A5/KCNJ10/RGS2/RGS4	7	1.88982
BP	GO:2000050	regulation of non-canonical Wnt signaling pathway	7/2423	23/18670	0.0227982	0.0939872	0.0689195	NKD1/DACT1/SFRP1/MLLT3/DKK1/SFRP4/SFRP2	7	1.88982
BP	GO:2000726	negative regulation of cardiac muscle cell differentiation	7/2423	23/18670	0.0227982	0.0939872	0.0689195	PI16/CAV3/G6PD/DKK1/RGS2/FZD7/RGS4	7	2.64575
BP	GO:0120162	positive regulation of cold-induced thermogenesis	20/2423	97/18670	0.0230088	0.0947891	0.0695075	IL13/FABP4/ACADL/LEPR/ADIPOQ/GADD45G/PPARGC1A/FFAR4/FABP5/UCP1/IL18/OXTR/SYK/IGF1R/KSR2/PLAC8/SLN/LEP/MFAP2/IRF4	20	1.34164
BP	GO:0061351	neural precursor cell proliferation	28/2423	147/18670	0.023067	0.094963	0.0696351	ASCL1/POU3F2/ADGRG1/TGFB1/CIP2A/SMARCD3/ARTN/SHCBP1/TRNP1/LHX5/PITX3/ID4/PTPRZ1/GLI3/FLNA/ARX/HHIP/DBN1/RASSF10/WNT1/FGFR1/WNT2/DRD2/INSM1/VAX1/SPINT2/SPINT1/SIX3	28	4.91354
BP	GO:0030239	myofibril assembly	16/2423	73/18670	0.0232059	0.0952697	0.0698599	ACTN2/MYH3/LMOD2/PGM5/NEB/MYL2/CAV3/MYH6/NEBL/ANKRD1/PDGFRA/MYBPC2/FHOD3/NKX2-5/TNNT1/KRT19	16	2
BP	GO:0045685	regulation of glial cell differentiation	16/2423	73/18670	0.0232059	0.0952697	0.0698599	TNFRSF21/TGFB1/IL6/NTRK3/OLIG2/ID4/PTPRZ1/SERPINE2/NKX6-1/ZNF488/NOG/TENM4/ZNF365/LIF/LIN28A/SPINT1	16	4
BP	GO:0061844	antimicrobial humoral immune response mediated by antimicrobial peptide	16/2423	73/18670	0.0232059	0.0952697	0.0698599	REG3A/KLK3/KLK7/S100A9/CXCL9/PGLYRP3/CXCL3/CXCL8/REG3G/PF4V1/CXCL1/PGLYRP4/CXCL6/BPIFA1/DEFA5/CXCL5	16	3
BP	GO:1903524	positive regulation of blood circulation	16/2423	73/18670	0.0232059	0.0952697	0.0698599	ACE2/ADRA1A/AVPR1B/PTAFR/OXTR/PTGS2/CD38/APELA/TGFB2/HRH2/SCN3B/RGS2/RGS4/TACR3/NKX2-5/CHGA	16	3
BP	GO:0050772	positive regulation of axonogenesis	18/2423	85/18670	0.0233483	0.095788	0.07024	PLXNA3/LIMK1/ISLR2/BDNF/CHODL/NTRK3/SEMA4D/SLIT2/DBN1/CRABP2/L1CAM/PLXNB3/SHOX2/NTRK2/SLITRK1/LPAR3/EFNA5/NEFL	18	4.24264
BP	GO:0032680	regulation of tumor necrosis factor production	30/2423	160/18670	0.0234819	0.0962692	0.0705929	CIDEA/ADIPOQ/IGF1/TREM2/LGALS9/LILRB1/CD2/SASH3/SPN/GPR18/CLEC7A/CCL19/IL10/RASGRP1/TNFRSF8/PTPRC/MMP8/HAVCR2/IFNG/PTAFR/GPNMB/CYBB/SYK/IL12B/TWIST1/PTPN22/GSTP1/LEP/ISL1/CHRNA7	30	4.38178
BP	GO:0019730	antimicrobial humoral response	24/2423	122/18670	0.0235771	0.0965925	0.0708299	REG3A/KLK3/KLK7/S100A9/PI3/CXCL9/PGLYRP3/CXCL3/CXCL8/ACOD1/BPIFA2/REG3G/PF4V1/JCHAIN/CXCL1/BPIFB1/PGLYRP4/CXCL6/CHGA/BPIFA1/DEFA5/DMBT1/PRSS2/CXCL5	24	4.08248
BP	GO:0014009	glial cell proliferation	12/2423	50/18670	0.0237397	0.0971916	0.0712693	LEPR/TERT/TREM2/LTA/MYB/AREG/IL6/PENK/TNF/IL1B/SOX4/SOX11	12	2.3094
BP	GO:0051180	vitamin transport	10/2423	39/18670	0.024161	0.0988482	0.072484	SLC5A6/AFM/SLC52A1/SLC52A3/SLC2A1/ABCC1/SLC35F3/FOLR1/STRA6/TCN1	10	1.89737
CC	GO:0062023	collagen-containing extracellular matrix	130/2551	406/19717	4.81023e-24	2.91981e-21	2.2684e-21	CBLN4/ZP2/COL7A1/AZGP1/SERPINC1/APOC3/SPARCL1/ADIPOQ/USH2A/ANG/ECM2/CHADL/TNR/PLG/F9/HPX/A1BG/APCS/LGALS9/COL8A1/S100A9/ADAMTS3/SMOC2/F13A1/ENTPD2/COL14A1/DCN/COL12A1/TGFB3/GREM1/MGP/LAMB1/COL11A2/LEFTY2/MMP23B/VWA2/ABI3BP/GDF10/OGN/TGFB1/COL24A1/LTBP2/EGFL6/P3H2/COL6A2/EDIL3/FBLN2/EMILIN2/ADAMTS2/AEBP1/SOD3/COL6A5/SFRP1/MMP28/COL28A1/EFEMP1/MMP8/MFAP4/EMILIN1/OMD/PODN/PTPRZ1/MFAP5/PRELP/FBLN1/SE…	130	8.24435
CC	GO:0097060	synaptic membrane	104/2551	432/19717	1.36683e-10	4.14832e-08	3.22284e-08	ACTN2/DRD1/SLC6A2/SLC1A2/CAMK2A/ADCY8/CTNNA2/GABBR2/ADRA1A/KCNB1/P2RX3/CHRNA4/LRRTM4/CPEB3/DLGAP2/STX3/ADAM22/P2RX1/EPHA7/GRM6/GRM5/CRYAB/GRIA4/NLGN3/PTPRO/CLSTN2/HOMER3/GRM1/FABP5/KCNA3/CNTN1/ANK2/RIMS4/LRRC4C/ADORA1/SLC16A3/GABRG1/NTRK3/CNTNAP1/SNCAIP/GRIN1/CHRNA5/SLC6A3/SLC6A5/IGSF9B/DNM1/GRM3/P2RY4/CHRNA6/NTNG2/ADGRB1/GPC4/LRFN4/GRID2IP/SNPH/UNC13C/MPP2/GRIN2A/DBN1/DLG3/CHRNA1/CHRNA9/PRKCG/SR…	104	7.2563
CC	GO:1902495	transmembrane transporter complex	83/2551	324/19717	4.22593e-10	8.55047e-08	6.64287e-08	LRRC52/CACNA1I/KCNJ8/CACNG1/KCNB1/FXYD1/CLCN1/CHRNA4/KCNE2/ABCC9/LRRC8B/KCNMB4/LRRC26/CNGB3/GRIA4/KCNS2/CACNA2D1/BEST1/CACNB3/KCNQ2/KCNA3/TRPC3/SCN2B/GABRG1/KCNQ3/KCNN4/GRIN1/KCNE4/CHRNA5/MCUB/KCNIP1/RYR1/CHRNA6/CACNB1/FXYD2/CLCNKB/HCN1/CACNA1B/SCN7A/KCNQ5/CLDN4/KCNS1/GRIN2A/BEST3/DLG3/KCNH2/CHRNA1/CHRNA9/KCNG3/CLIC6/SCN3B/CATSPERB/LRRC38/CACNA1G/GABRA4/ATP1A4/GABRA2/TRPC7/GABRR1/SNAP25/GABRP/KCN…	83	6.91515
CC	GO:1990351	transporter complex	83/2551	332/19717	1.49662e-09	2.27112e-07	1.76444e-07	LRRC52/CACNA1I/KCNJ8/CACNG1/KCNB1/FXYD1/CLCN1/CHRNA4/KCNE2/ABCC9/LRRC8B/KCNMB4/LRRC26/CNGB3/GRIA4/KCNS2/CACNA2D1/BEST1/CACNB3/KCNQ2/KCNA3/TRPC3/SCN2B/GABRG1/KCNQ3/KCNN4/GRIN1/KCNE4/CHRNA5/MCUB/KCNIP1/RYR1/CHRNA6/CACNB1/FXYD2/CLCNKB/HCN1/CACNA1B/SCN7A/KCNQ5/CLDN4/KCNS1/GRIN2A/BEST3/DLG3/KCNH2/CHRNA1/CHRNA9/KCNG3/CLIC6/SCN3B/CATSPERB/LRRC38/CACNA1G/GABRA4/ATP1A4/GABRA2/TRPC7/GABRR1/SNAP25/GABRP/KCN…	83	6.91515
CC	GO:0034702	ion channel complex	77/2551	301/19717	1.92339e-09	2.335e-07	1.81406e-07	LRRC52/CACNA1I/KCNJ8/CACNG1/KCNB1/CLCN1/CHRNA4/KCNE2/ABCC9/LRRC8B/KCNMB4/LRRC26/GRIA4/KCNS2/CACNA2D1/BEST1/CACNB3/KCNQ2/KCNA3/TRPC3/SCN2B/GABRG1/KCNQ3/KCNN4/GRIN1/KCNE4/CHRNA5/MCUB/KCNIP1/RYR1/CHRNA6/CACNB1/CLCNKB/HCN1/CACNA1B/SCN7A/KCNQ5/CLDN4/KCNS1/GRIN2A/BEST3/DLG3/KCNH2/CHRNA1/CHRNA9/KCNG3/CLIC6/SCN3B/CATSPERB/LRRC38/CACNA1G/GABRA4/GABRA2/TRPC7/GABRR1/SNAP25/GABRP/KCNF1/SHISA9/CLIC3/CHRND/LRR…	77	6.72367
CC	GO:0044420	extracellular matrix component	24/2551	51/19717	2.93423e-09	2.96846e-07	2.3062e-07	COL7A1/TNR/COL8A1/COL14A1/COL12A1/LAMB1/COL11A2/MFAP4/EMILIN1/PTPRZ1/MFAP5/FBLN1/ACAN/COL5A1/TNC/LUM/COL1A2/COL1A1/COL3A1/FBN2/MFAP2/LAMA1/COL11A1/LAMC2	24	4.08248
CC	GO:0005581	collagen trimer	32/2551	87/19717	1.4147e-08	1.22674e-06	9.53059e-07	C1QTNF3/COL7A1/ADIPOQ/COL8A1/C1QTNF2/COL14A1/DCN/COL12A1/C1QTNF1/COL11A2/GLDN/COL24A1/C1QTNF7/COL6A2/EMILIN2/COL6A5/COL28A1/EMILIN1/MARCO/COL6A3/COL5A1/LUM/COL1A2/COL1A1/COL3A1/COL16A1/COL8A2/CTHRC1/C1QL4/COL9A2/COL11A1/COL10A1	32	4.59619
CC	GO:0009897	external side of plasma membrane	90/2551	393/19717	3.09577e-08	2.34892e-06	1.82487e-06	IL13/CA4/AZGP1/SLC22A11/GFRA1/LEPR/ACKR2/CHRNA4/PLG/BTNL9/SLC2A4/CCR6/CD86/CXCR6/IL13RA2/FASLG/LILRB1/IL12RB1/CSF2RA/P2RX1/IL2RB/CD1C/CD2/CXCR3/ULBP2/CD3E/ITGB2/CD5/CCR4/ULBP3/XCR1/CXCL9/ITGAM/CCR5/IL2RG/CD24/PTPRC/ADGRE1/CTLA4/IL7R/CCR7/CD8A/P2RY12/IL12B/ANTXR1/CD3G/SERPINE2/ICOS/PDGFRA/TNFRSF11A/CD27/GPC4/SSC5D/IL2RA/CSF3R/TNFRSF13C/PKHD1/CD1E/TNF/F3/TLR8/CD80/CXCR5/BTN1A1/MS4A1/CD19/ULBP1/IGLL…	90	7.16783
CC	GO:0005911	cell-cell junction	99/2551	459/19717	1.48362e-07	1.00062e-05	7.77381e-06	CDH22/HEPACAM/CTNNA2/ABCB11/DSG1/CTNNA3/ABCB4/FXYD1/CLDN2/CLDN8/PGM5/MIP/CDH26/PTK7/STX3/PMP22/SH3BP1/PANX3/ZAP70/VAV1/AKR1B1/FAT2/ECT2/CAV3/CD2/BAIAP2L2/FRMPD2/NECTIN4/NHS/ITK/CORO1A/GJB4/IQGAP1/CD3E/PKP1/DSG2/CD53/PLXDC1/FSCN1/DES/KIRREL1/THEMIS/WTIP/MXRA8/ANK2/PDZD3/EPPK1/CLDN11/ILDR1/CNTNAP1/OXTR/CNKSR1/FLNA/SV2A/SLC2A1/S100A11/NPHS2/CLMP/ADGRB1/PCDHGA12/CLDN4/DBN1/DLG3/PCDH9/PRKCG/EVPL/SAPCD…	99	7.53778
CC	GO:0098793	presynapse	104/2551	491/19717	1.85667e-07	1.127e-05	8.75569e-06	SH3GL3/DRD1/SLC6A2/SLC1A2/ADCY8/CTNNA2/GLUL/MME/SYT9/MT3/ADRA1A/SEPTIN4/P2RX3/USH2A/CHRNA4/SLC2A4/STX3/SLC18A1/CABP4/ROR1/P2RX1/CBARP/HAP1/GRM6/NLGN3/APBA2/PRSS12/PRKCB/OTOF/BDNF/KCNA3/SLC17A8/CNTN1/RIMS4/PFN2/ADORA1/ATP6V1B1/MICAL1/CNTNAP1/KCNK9/PENK/CALB1/SNCAIP/GRIN1/SV2A/SLC6A3/SLC6A5/SNCA/DNM1/GRM3/P2RY4/PTPRN/ZNF804A/CHRNA6/NTNG2/GPC4/CACNA1B/SNPH/UNC13C/CTBP2/UCN3/RAB27B/GRIN2A/AMPH/KCNJ10…	104	7.06018
CC	GO:0045211	postsynaptic membrane	75/2551	323/19717	2.39228e-07	1.3201e-05	1.02559e-05	ACTN2/DRD1/CAMK2A/ADCY8/CTNNA2/GABBR2/ADRA1A/KCNB1/CHRNA4/LRRTM4/CPEB3/DLGAP2/ADAM22/P2RX1/EPHA7/GRM5/GRIA4/NLGN3/PTPRO/CLSTN2/HOMER3/GRM1/FABP5/KCNA3/CNTN1/ANK2/LRRC4C/ADORA1/SLC16A3/GABRG1/NTRK3/GRIN1/CHRNA5/SLC6A3/IGSF9B/DNM1/GRM3/CHRNA6/ADGRB1/LRFN4/GRID2IP/GRIN2A/DBN1/DLG3/CHRNA1/CHRNA9/ANK1/SYNDIG1/MUSK/GABRA4/ANK3/SSPN/GABRA2/ERBB4/GABRR1/GABBR1/GABRP/FAIM2/SHISA9/SH2D5/DRD2/CHRND/GRIP1/DR…	75	5.88897
CC	GO:0099240	intrinsic component of synaptic membrane	45/2551	164/19717	5.2172e-07	2.55592e-05	1.9857e-05	DRD1/SLC1A2/ADCY8/ADRA1A/P2RX3/CHRNA4/ADAM22/P2RX1/EPHA7/NLGN3/PTPRO/CLSTN2/KCNA3/CNTN1/LRRC4C/ADORA1/SLC16A3/NTRK3/GRIN1/SLC6A3/SLC6A5/GRM3/P2RY4/CHRNA6/NTNG2/GPC4/LRFN4/GRIN2A/CHRNA1/CHRNA9/GABRA4/ERBB4/NTNG1/CADM3/SHISA9/DRD2/CHRND/GRID2/NRXN1/SLITRK1/KCND2/NLGN1/HTR3A/GABRA5/CDH10	45	4.91935
CC	GO:0016324	apical plasma membrane	73/2551	318/19717	5.49242e-07	2.55592e-05	1.9857e-05	AQP6/SLC12A1/SLC14A2/SLC22A12/ADCY8/CD300LG/P2RX2/CA4/DSG1/SLC22A11/OTOG/ABCB4/FXYD1/USH2A/PAPPA2/CYP4A11/MIP/STX3/JAG1/SLC34A3/CRB2/NHS/PTPRO/SI/AQP1/DSG2/CLCA4/CACNB3/SLC9A3/ANK2/AQP10/SLC52A3/P2RY6/ATP6V1B1/DUOX1/SLC44A4/OXTR/KCNE4/UPK1A/SLC2A1/P2RY4/ATP6V0D2/SLC10A2/CLDN4/PKHD1/UPK1B/RAB27B/MUC20/DPEP1/SAPCD2/SLC9A4/IGSF5/AJAP1/SLC6A19/MTCL1/TRPV5/PDPN/FOLR1/EPCAM/VANGL2/CEACAM5/KCNK2/MUC1/SL…	73	4.5646
CC	GO:0031225	anchored component of membrane	46/2551	170/19717	6.05515e-07	2.55592e-05	1.9857e-05	RHBG/CA4/TECTB/GFRA1/HJV/CD48/CNTN4/VNN2/CD2/ULBP2/ULBP3/SMPDL3B/GAS1/CNTN1/CD24/LY6K/NEGR1/SPACA4/NTNG2/LSAMP/GPC4/MELTF/PKHD1/RAB27B/GPC2/DPEP1/ULBP1/PLAUR/NTM/NTNG1/CD177/LYPD6/FOLR1/RAET1L/IZUMO1R/PRSS41/GAD2/CEACAM5/GP2/PRSS21/GFRA3/EFNA5/CEACAM6/LYPD6B/PRSS22/CEACAM7	46	5.30791
CC	GO:0043025	neuronal cell body	103/2551	497/19717	6.31612e-07	2.55592e-05	1.9857e-05	SLC6A2/ASCL1/ADCY8/GLUL/MME/P2RX2/TMEM100/KCNB1/P2RX3/USH2A/ANG/CHRNA4/PPARGC1A/SNCG/BRS3/ASIC2/SLC4A8/CNR2/TRPM2/TGFB3/APOD/KIF5C/EPHA7/ITGA4/CRYAB/GRIA4/TGFB1/CCR4/PLXDC1/PDE1C/PDE1A/ERMN/NRSN2/SLC17A8/UNC5C/PDE10A/ADORA1/NGB/PITX3/KCNN4/CYBB/HPCA/PENK/CALB1/FLNA/SNCAIP/ROR2/PCSK2/NRSN1/SV2A/SLC6A3/IGSF9B/MYO10/SNCA/PTPRN/ZNF804A/NCF1/MAPK10/CACNA1B/SNPH/S100B/CD22/TGFB2/TIMP2/DLG3/INHA/MAP1A/S…	103	7.58704
CC	GO:0005796	Golgi lumen	32/2551	102/19717	9.52701e-07	3.61431e-05	2.80796e-05	CGA/F9/MUCL1/DCN/OGN/TGFB1/MMP11/MUC15/MUC12/SOD3/OMD/PRELP/MUC21/HS3ST1/ACAN/GPC4/MUC20/MMP14/GPC2/FMOD/WNT1/LUM/MUC5B/MMP16/FGF23/VCAN/MUC1/MUC2/MUC5AC/DEFA5/MUC6/WNT7B	32	4.94975
CC	GO:0098982	GABA-ergic synapse	25/2551	71/19717	1.35857e-06	4.8509e-05	3.76867e-05	DRD1/ADRA1A/NLGN3/PTPRO/SLITRK2/GUCY1A1/CALB1/SV2A/IGSF9B/ACAN/LRFN4/CTBP2/GABRA4/ERBB4/SLC6A17/GABRR1/GABBR1/DRD2/GAP43/NRXN1/SLITRK1/KCND2/EFNA5/GABRA5/CDH10	25	4.2
CC	GO:0042734	presynaptic membrane	43/2551	161/19717	2.02355e-06	6.82386e-05	5.30146e-05	DRD1/SLC6A2/SLC1A2/ADCY8/CTNNA2/ADRA1A/P2RX3/CHRNA4/STX3/P2RX1/GRM6/KCNA3/CNTN1/RIMS4/ADORA1/CNTNAP1/SNCAIP/SLC6A3/SLC6A5/DNM1/GRM3/P2RY4/CHRNA6/NTNG2/GPC4/SNPH/UNC13C/GRIN2A/GRM4/ERBB4/GABBR1/SNAP25/NTNG1/CADM3/DRD2/UNC13A/NRXN1/GAD2/KCTD8/HTR3A/SNAP91/GABRA5/CDH10	43	4.11746
CC	GO:0099699	integral component of synaptic membrane	41/2551	152/19717	2.64009e-06	8.42675e-05	6.54675e-05	DRD1/SLC1A2/ADCY8/ADRA1A/P2RX3/CHRNA4/ADAM22/P2RX1/EPHA7/NLGN3/PTPRO/CLSTN2/KCNA3/LRRC4C/ADORA1/SLC16A3/NTRK3/GRIN1/SLC6A3/SLC6A5/GRM3/P2RY4/CHRNA6/LRFN4/GRIN2A/CHRNA1/CHRNA9/GABRA4/ERBB4/CADM3/SHISA9/DRD2/CHRND/GRID2/NRXN1/SLITRK1/KCND2/NLGN1/HTR3A/GABRA5/CDH10	41	4.52904
CC	GO:0016323	basolateral plasma membrane	53/2551	217/19717	2.77652e-06	8.42675e-05	6.54675e-05	SLCO1B3/RHBG/SLC27A5/ADCY8/CTNNA2/AQP9/CD300LG/SLC10A1/LEPR/SLC22A1/SLC4A1/CLDN8/FRMPD2/AQP1/SLC7A8/BEST1/OTOF/ANK2/EPPK1/ADORA1/P2RY6/ATP6V1B1/P2RY12/CD38/SLC2A1/P2RY4/SLC7A7/ABCC1/CLDN4/KCNJ10/DLG3/MUC20/ANK1/SLC9A4/ANK3/AJAP1/ERBB4/PDPN/TACSTD2/FOLR1/TGFA/EPCAM/ADRA2A/SLC4A11/VANGL2/VSIG1/CEACAM5/ITGA3/ATP12A/PROM2/CDH17/KCNJ16/CA9	53	3.98346
CC	GO:0045177	apical part of cell	81/2551	384/19717	4.83159e-06	0.000139656	0.000108499	AQP6/SLC12A1/SLC14A2/SLC22A12/ADCY8/AQP8/REN/CD300LG/P2RX2/CA4/ABCB11/DSG1/SLC22A11/OTOG/ABCB4/FXYD1/USH2A/PAPPA2/CYP4A11/MIP/STX3/JAG1/SLC34A3/CRB2/NHS/PTPRO/SI/AQP1/DSG2/CLCA4/CACNB3/SLC9A3/ANK2/AQP10/PDZD3/SLC52A3/P2RY6/ATP6V1B1/DUOX1/SLC44A4/OXTR/KCNE4/UPK1A/SLC2A1/P2RY4/ATP6V0D2/SLC10A2/CLDN4/PKHD1/UPK1B/RAB27B/MUC20/DPEP1/SAPCD2/SLC9A4/IGSF5/AJAP1/SLC6A19/MTCL1/FAP/TRPV5/PDPN/FOLR1/EPCAM/VA…	81	4.55556
CC	GO:0034364	high-density lipoprotein particle	13/2551	26/19717	5.54329e-06	0.000152944	0.000118823	SAA2/HPR/SAA1/APOC4/APOF/APOC3/APOA5/APOC1/PON1/LCAT/SAA4/PLTP/APOA4	13	-2.49615
CC	GO:0008076	voltage-gated potassium channel complex	27/2551	87/19717	8.22798e-06	0.000211251	0.000164121	LRRC52/KCNJ8/KCNB1/KCNE2/KCNMB4/LRRC26/KCNS2/KCNQ2/KCNA3/KCNQ3/KCNN4/KCNE4/KCNIP1/HCN1/KCNQ5/KCNS1/KCNH2/KCNG3/LRRC38/SNAP25/KCNF1/DPP10/KCNV1/KCND2/KCNK2/HCN4/KCNJ16	27	3.65655
CC	GO:0098936	intrinsic component of postsynaptic membrane	34/2551	122/19717	8.51475e-06	0.000211251	0.000164121	DRD1/ADRA1A/ADAM22/P2RX1/EPHA7/NLGN3/PTPRO/CLSTN2/KCNA3/CNTN1/LRRC4C/ADORA1/SLC16A3/NTRK3/GRIN1/SLC6A3/GRM3/CHRNA6/LRFN4/GRIN2A/CHRNA1/CHRNA9/GABRA4/ERBB4/SHISA9/DRD2/CHRND/GRID2/SLITRK1/KCND2/NLGN1/HTR3A/GABRA5/CDH10	34	5.14496
CC	GO:0099055	integral component of postsynaptic membrane	33/2551	117/19717	8.70063e-06	0.000211251	0.000164121	DRD1/ADRA1A/ADAM22/P2RX1/EPHA7/NLGN3/PTPRO/CLSTN2/KCNA3/LRRC4C/ADORA1/SLC16A3/NTRK3/GRIN1/SLC6A3/GRM3/CHRNA6/LRFN4/GRIN2A/CHRNA1/CHRNA9/GABRA4/ERBB4/SHISA9/DRD2/CHRND/GRID2/SLITRK1/KCND2/NLGN1/HTR3A/GABRA5/CDH10	33	5.04825
[truncated: 376 more rows]
